# Supplementary material for: From electronic structure to model application for alkyl cyclohexane combustion chemistry: H-atom abstraction reactions by HȮ2radical
Source: Royal Society of Chemistry journal article supplement (doi:10.1039/d2cp03726b), 2023-01-01
Supplement: d2cp03726b2.dat [file d2cp03726b2.dat]

H2O2                    H   2O   2              200.000 3000.000 1000.000      1 !\Author: KPS/SNE/SJK !\Comment: [H2O2] [-CONSULT MESSPF FOR LEVELS OF THEORY]
+3.79009831E+00+5.34065163E-03-2.18630261E-06+4.34355035E-10-3.41610208E-14    2
-1.75854860E+04+5.51786581E+00+4.53907123E+00-3.27236173E-03+2.26213550E-05    3
-2.69858051E-08+1.04423820E-11-1.75374400E+04+3.07424633E+00+0.00000000E+00    4
HO2                     H   1O   2              200.000 3000.000 1000.000      1 !\Author: KPS/SNE/SJK !\Comment: [HO2] [-CONSULT MESSPF FOR LEVELS OF THEORY]
+3.40257058E+00+3.46439351E-03-1.50861515E-06+3.24632409E-10-2.79481294E-14    2
+1.63310099E+02+7.00692897E+00+4.43619827E+00-5.74386345E-03+2.26753092E-05    3
-2.50871165E-08+9.37450569E-12+1.44949230E+02+3.10314611E+00+0.00000000E+00    4
MCH                     C   7H  14              200.000 3000.000 1000.000      1 !\Author: KPS/SNE/SJK !\Comment: [MCH] [-CONSULT MESSPF FOR LEVELS OF THEORY]
+2.90274953E+00+6.62467427E-02-3.35855865E-05+8.21530120E-09-7.87324645E-13    2
-2.34370666E+04+4.44407887E+00+2.74214349E+00+1.33970978E-02+1.54132993E-04    3
-2.14645126E-07+8.73647744E-11-2.13398109E+04+1.67926457E+01+0.00000000E+00    4
MP1                     C   7H  13              200.000 3000.000 1000.000      1 !\Author: KPS/SNE/SJK !\Comment: [MP1] [-CONSULT MESSPF FOR LEVELS OF THEORY]
+4.30975245E+00+6.09443331E-02-3.08108680E-05+7.52113755E-09-7.19711752E-13    2
+1.34005870E+03-4.58040777E-01+3.22523769E+00+1.74793856E-02+1.31427159E-04    3
-1.88185115E-07+7.72979752E-11+3.40073032E+03+1.51104510E+01+0.00000000E+00    4
MP2                     C   7H  13              200.000 3000.000 1000.000      1 !\Author: KPS/SNE/SJK !\Comment: [MP2] [-CONSULT MESSPF FOR LEVELS OF THEORY]
+3.35085454E+00+6.25303940E-02-3.18006105E-05+7.79757908E-09-7.48713732E-13    2
-5.88754306E+02+4.99262882E+00+4.42418862E+00+7.75766346E-03+1.52228287E-04    3
-2.06352209E-07+8.30715734E-11+1.15470064E+03+1.07647723E+01+0.00000000E+00    4
MP3                     C   7H  13              200.000 3000.000 1000.000      1 !\Author: KPS/SNE/SJK !\Comment: [MP3] [-CONSULT MESSPF FOR LEVELS OF THEORY]
+4.54686326E+00+6.08256691E-02-3.08109130E-05+7.53246075E-09-7.21625410E-13    2
+5.14167025E+01-1.81967421E+00+2.73947690E+00+2.05050949E-02+1.26208510E-04    3
-1.84293060E-07+7.62124324E-11+2.24885090E+03+1.71844965E+01+0.00000000E+00    4
MP4                     C   7H  13              200.000 3000.000 1000.000      1 !\Author: KPS/SNE/SJK !\Comment: [MP4] [-CONSULT MESSPF FOR LEVELS OF THEORY]
+4.57634530E+00+6.07891796E-02-3.07892864E-05+7.52620274E-09-7.20930031E-13    2
-8.58968547E+01-1.90213964E+00+2.89604043E+00+2.00449206E-02+1.26670743E-04    3
-1.84401698E-07+7.61715051E-11+2.08334911E+03+1.64720974E+01+0.00000000E+00    4
MP5                     C   7H  13              200.000 3000.000 1000.000      1 !\Author: KPS/SNE/SJK !\Comment: [MP5] [-CONSULT MESSPF FOR LEVELS OF THEORY]
+4.54811792E+00+6.08266321E-02-3.08095967E-05+7.53130631E-09-7.21420153E-13    2
-3.87132644E+01-1.79883079E+00+2.91207023E+00+1.96116178E-02+1.27962057E-04    3
-1.85822214E-07+7.67115079E-11+2.13275125E+03+1.64247147E+01+0.00000000E+00    4

ECH                     C   8H  16              200.000 3000.000 1000.000      1 !\Author: KPS/SNE/SJK !\Comment: [ECH] [-CONSULT MESSPF FOR LEVELS OF THEORY]
+4.00970426E+00+7.46899563E-02-3.78372461E-05+9.24908786E-09-8.85885113E-13    2
-2.64778109E+04+5.41161534E-01+4.45400502E+00+1.21212692E-02+1.79151918E-04    3
-2.46251350E-07+9.97497740E-11-2.42195122E+04+1.15540431E+01+0.00000000E+00    4
EP1                     C   8H  15              200.000 3000.000 1000.000      1 !\Author: KPS/SNE/SJK !\Comment: [EP1] [-CONSULT MESSPF FOR LEVELS OF THEORY]
+5.94016880E+00+6.87861613E-02-3.47609964E-05+8.48201958E-09-8.11352374E-13    2
-2.34831903E+03-7.74846836E+00+5.05415025E+00+1.43520678E-02+1.64930961E-04    3
-2.31296972E-07+9.45957935E-11+5.40790038E+01+9.03458953E+00+0.00000000E+00    4
EP2                     C   8H  15              200.000 3000.000 1000.000      1 !\Author: KPS/SNE/SJK !\Comment: [EP2] [-CONSULT MESSPF FOR LEVELS OF THEORY]
+4.26782225E+00+7.08573749E-02-3.58574175E-05+8.75700248E-09-8.38084306E-13    2
-3.00527959E+03+2.33418716E+00+6.40403234E+00+2.58537746E-03+1.87827710E-04    3
-2.49646313E-07+1.00015890E-10-1.13716639E+03+4.92814887E+00+0.00000000E+00    4
EP3                     C   8H  15              200.000 3000.000 1000.000      1 !\Author: KPS/SNE/SJK !\Comment: [EP3] [-CONSULT MESSPF FOR LEVELS OF THEORY]
+4.49702263E+00+7.07028262E-02-3.58226854E-05+8.75701836E-09-8.38749233E-13    2
-3.65226186E+03+9.99804620E-01+6.19117064E+00+3.62253297E-03+1.87547404E-04    3
-2.50987719E-07+1.00922043E-10-1.67893406E+03+5.83367390E+00+0.00000000E+00    4
EP4                     C   8H  15              200.000 3000.000 1000.000      1 !\Author: KPS/SNE/SJK !\Comment: [EP4] [-CONSULT MESSPF FOR LEVELS OF THEORY]
+5.73282144E+00+6.92218106E-02-3.50608543E-05+8.57094266E-09-8.21097262E-13    2
-3.16771811E+03-6.32399279E+00+3.81531376E+00+2.17899025E-02+1.47941265E-04    3
-2.14364326E-07+8.84614683E-11-6.57658685E+02+1.48436443E+01+0.00000000E+00    4
EP5                     C   8H  15              200.000 3000.000 1000.000      1 !\Author: KPS/SNE/SJK !\Comment: [EP5] [-CONSULT MESSPF FOR LEVELS OF THEORY]
+5.74382936E+00+6.91633725E-02-3.50089836E-05+8.55339554E-09-8.19010701E-13    2
-3.20009002E+03-6.28770206E+00+4.49615488E+00+1.94949124E-02+1.50360402E-04    3
-2.14985226E-07+8.82663597E-11-8.40399466E+02+1.15562263E+01+0.00000000E+00    4
EP6                     C   8H  15              200.000 3000.000 1000.000      1 !\Author: KPS/SNE/SJK !\Comment: [EP6] [-CONSULT MESSPF FOR LEVELS OF THEORY]
+5.61349807E+00+6.93369156E-02-3.51050592E-05+8.57821107E-09-8.21472667E-13    2
-3.08727368E+03-5.37515621E+00+4.73587166E+00+1.74113292E-02+1.55245942E-04    3
-2.19718535E-07+8.99274844E-11-7.72792945E+02+1.08490338E+01+0.00000000E+00    4

nPCH                    C   9H  18              200.000 3000.000 1000.000      1 !\Author: KPS/SNE/SJK !\Comment: [NPCH] [-CONSULT MESSPF FOR LEVELS OF THEORY]
+5.32176406E+00+8.29245133E-02-4.19897421E-05+1.02601721E-08-9.82460102E-13    2
-2.98576193E+04-4.76961474E+00+4.61591204E+00+2.23656367E-02+1.77356713E-04    3
-2.51808927E-07+1.03004912E-10-2.72680138E+04+1.23514103E+01+0.00000000E+00    4
nP1                     C   9H  17              200.000 3000.000 1000.000      1 !\Author: KPS/SNE/SJK !\Comment: [NP1] [-CONSULT MESSPF FOR LEVELS OF THEORY]
+7.02332769E+00+7.70499921E-02-3.88264560E-05+9.45058119E-09-9.02132860E-13    2
-5.19395467E+03-1.17278539E+01+8.68019518E+00+7.22903548E-03+1.94328017E-04    3
-2.61740744E-07+1.05298808E-10-3.10085853E+03-6.08249590E+00+0.00000000E+00    4
nP2                     C   9H  17              200.000 3000.000 1000.000      1 !\Author: KPS/SNE/SJK !\Comment: [NP2] [-CONSULT MESSPF FOR LEVELS OF THEORY]
+5.92872659E+00+7.88535897E-02-3.99656645E-05+9.77286319E-09-9.36304376E-13    2
-6.85273794E+03-5.64671035E+00+6.58000120E+00+9.47213744E-03+1.99740411E-04    3
-2.72334780E-07+1.10195441E-10-4.41474987E+03+5.63580318E+00+0.00000000E+00    4
nP3                     C   9H  17              200.000 3000.000 1000.000      1 !\Author: KPS/SNE/SJK !\Comment: [NP3] [-CONSULT MESSPF FOR LEVELS OF THEORY]
+5.57568504E+00+7.93028336E-02-4.02127387E-05+9.83783898E-09-9.42954526E-13    2
-6.51457934E+03-3.04686063E+00+6.05821919E+00+1.02557503E-02+1.99649021E-04    3
-2.72957858E-07+1.10555531E-10-4.02826493E+03+9.12672552E+00+0.00000000E+00    4
nP4                     C   9H  17              200.000 3000.000 1000.000      1 !\Author: KPS/SNE/SJK !\Comment: [NP4] [-CONSULT MESSPF FOR LEVELS OF THEORY]
+6.85258200E+00+7.75713275E-02-3.92286852E-05+9.57662960E-09-9.16368685E-13    2
-7.41914970E+03-9.91643225E+00+4.18206143E+00+2.90222093E-02+1.54326361E-04    3
-2.28767374E-07+9.50922274E-11-4.60813713E+03+1.57483175E+01+0.00000000E+00    4
nP5                     C   9H  17              200.000 3000.000 1000.000      1 !\Author: KPS/SNE/SJK !\Comment: [NP5] [-CONSULT MESSPF FOR LEVELS OF THEORY]
+7.12120844E+00+7.72225056E-02-3.90356818E-05+9.52623999E-09-9.11290423E-13    2
-6.55560132E+03-1.08804381E+01+5.86455989E+00+1.89721212E-02+1.77244324E-04    3
-2.51213071E-07+1.03055047E-10-3.87553580E+03+8.83208300E+00+0.00000000E+00    4
nP6                     C   9H  17              200.000 3000.000 1000.000      1 !\Author: KPS/SNE/SJK !\Comment: [NP6] [-CONSULT MESSPF FOR LEVELS OF THEORY]
+7.87377781E+00+7.62773329E-02-3.85228340E-05+9.39565121E-09-8.98537721E-13    2
-6.55708364E+03-1.67850658E+01+5.24763973E-01+6.53465631E-02+5.95836763E-05    3
-1.30093082E-07+5.87634696E-11-3.50507297E+03+2.74383808E+01+0.00000000E+00    4
nP7                     C   9H  17              200.000 3000.000 1000.000      1 !\Author: KPS/SNE/SJK !\Comment: [NP7] [-CONSULT MESSPF FOR LEVELS OF THEORY]
+6.90653296E+00+7.75909405E-02-3.92639818E-05+9.58949775E-09-9.17895176E-13    2
-6.52069144E+03-1.06856961E+01+4.80159246E+00+2.79831671E-02+1.52913765E-04    3
-2.24822764E-07+9.30293336E-11-3.85749359E+03+1.20242309E+01+0.00000000E+00    4

iPCH                    C   9H  18              200.000 3000.000 1000.000      1 !\Author: KPS/SNE/SJK !\Comment: [IPCH] [-CONSULT MESSPF FOR LEVELS OF THEORY]
+4.77582624E+00+8.36554548E-02-4.24035778E-05+1.03699331E-08-9.93619367E-13    2
-3.02643389E+04-2.98711040E+00+3.08349825E+00+2.57234813E-02+1.75439132E-04    3
-2.52765423E-07+1.03923327E-10-2.74198114E+04+1.91962439E+01+0.00000000E+00    4
iP1                     C   9H  17              200.000 3000.000 1000.000      1 !\Author: KPS/SNE/SJK !\Comment: [IP1] [-CONSULT MESSPF FOR LEVELS OF THEORY]
+6.64386723E+00+7.78132819E-02-3.93586914E-05+9.61123404E-09-9.19988837E-13    2
-5.95000423E+03-1.06440964E+01+4.08537491E+00+2.70533480E-02+1.60532898E-04    3
-2.35286346E-07+9.74044272E-11-3.08256323E+03+1.48949038E+01+0.00000000E+00    4
iP2                     C   9H  17              200.000 3000.000 1000.000      1 !\Author: KPS/SNE/SJK !\Comment: [IP2] [-CONSULT MESSPF FOR LEVELS OF THEORY]
+4.19361978E+00+8.08735085E-02-4.09970756E-05+1.00261345E-08-9.60618660E-13    2
-7.69397685E+03+3.68479277E+00+6.74556136E+00+5.32747502E-03+2.04361107E-04    3
-2.72134797E-07+1.08836222E-10-5.67809788E+03+5.52798065E+00+0.00000000E+00    4
iP3                     C   9H  17              200.000 3000.000 1000.000      1 !\Author: KPS/SNE/SJK !\Comment: [IP3] [-CONSULT MESSPF FOR LEVELS OF THEORY]
+5.56692493E+00+7.91729123E-02-4.00932352E-05+9.79849558E-09-9.38419287E-13    2
-7.82669480E+03-3.82055644E+00+4.28836331E+00+2.16004294E-02+1.73631869E-04    3
-2.47676860E-07+1.01662876E-10-5.15501346E+03+1.58961595E+01+0.00000000E+00    4
iP4                     C   9H  17              200.000 3000.000 1000.000      1 !\Author: KPS/SNE/SJK !\Comment: [IP4] [-CONSULT MESSPF FOR LEVELS OF THEORY]
+6.77790442E+00+7.79651396E-02-3.95565275E-05+9.68249068E-09-9.28510285E-13    2
-7.23784507E+03-1.16781712E+01+3.03310550E+00+3.30606705E-02+1.48994273E-04    3
-2.25232685E-07+9.40851333E-11-4.16501315E+03+1.93706998E+01+0.00000000E+00    4
iP5                     C   9H  17              200.000 3000.000 1000.000      1 !\Author: KPS/SNE/SJK !\Comment: [IP5] [-CONSULT MESSPF FOR LEVELS OF THEORY]
+6.47184271E+00+7.81704203E-02-3.95944898E-05+9.67835342E-09-9.27082274E-13    2
-7.01043263E+03-9.32936759E+00+3.41264355E+00+3.15057859E-02+1.49719707E-04    3
-2.24105056E-07+9.32659637E-11-4.11640550E+03+1.81899088E+01+0.00000000E+00    4
iP6                     C   9H  17              200.000 3000.000 1000.000      1 !\Author: KPS/SNE/SJK !\Comment: [IP6] [-CONSULT MESSPF FOR LEVELS OF THEORY]
+6.45663093E+00+7.82043426E-02-3.96152804E-05+9.68363175E-09-9.27562229E-13    2
-6.96021237E+03-9.49794001E+00+3.33010118E+00+3.13592762E-02+1.50991018E-04    3
-2.25953210E-07+9.40745771E-11-4.03779978E+03+1.84363585E+01+0.00000000E+00    4

sBCH                    C  10H  20              200.000 3000.000 1000.000      1 !\Author: KPS/SNE/SJK !\Comment: [sBCH] [-CONSULT MESSPF FOR LEVELS OF THEORY]
+6.90906835E+00+9.06784258E-02-4.58170325E-05+1.11741014E-08-1.06826769E-12    2
-3.34210075E+04-1.29166791E+01+2.80597698E+00+4.46095437E-02+1.50310146E-04    3
-2.34481932E-07+9.86325613E-11-3.01853585E+04+2.03919021E+01+0.00000000E+00    4
sBP1                    C  10H  19              200.000 3000.000 1000.000      1 !\Author: KPS/SNE/SJK !\Comment: [sBP1] [-CONSULT MESSPF FOR LEVELS OF THEORY]
+8.01384556E+00+8.57544457E-02-4.32627477E-05+1.05407473E-08-1.00705112E-12    2
-9.13536931E+03-1.58838682E+01+6.07105687E+00+2.96672416E-02+1.70240249E-04    3
-2.48334811E-07+1.02395503E-10-6.27826548E+03+7.31336044E+00+0.00000000E+00    4
sBP2                    C  10H  19              200.000 3000.000 1000.000      1 !\Author: KPS/SNE/SJK !\Comment: [sBP2] [-CONSULT MESSPF FOR LEVELS OF THEORY]
+7.23781151E+00+8.70603099E-02-4.40969419E-05+1.07779713E-08-1.03225985E-12    2
-1.05995656E+04-1.18599559E+01+5.94621144E+00+2.09745376E-02+1.99864089E-04    3
-2.82622799E-07+1.15784852E-10-7.59865291E+03+9.76333682E+00+0.00000000E+00    4
sBP3                    C  10H  19              200.000 3000.000 1000.000      1 !\Author: KPS/SNE/SJK !\Comment: [sBP3] [-CONSULT MESSPF FOR LEVELS OF THEORY]
+1.09974826E+01+8.15117929E-02-4.07446639E-05+9.84783768E-09-9.34459178E-13    2
-9.97330247E+03-3.38353775E+01+2.06929353E+00+5.17120152E-02+1.43157686E-04    3
-2.42629955E-07+1.06368950E-10-5.78724159E+03+2.30203827E+01+0.00000000E+00    4
sBP4                    C  10H  19              200.000 3000.000 1000.000      1 !\Author: KPS/SNE/SJK !\Comment: [sBP4] [-CONSULT MESSPF FOR LEVELS OF THEORY]
+5.23342560E+00+8.92615932E-02-4.51702688E-05+1.10314737E-08-1.05580166E-12    2
-1.09531576E+04+6.68587638E-01+7.70930577E+00+3.15037019E-03+2.39142128E-04    3
-3.18581111E-07+1.27879729E-10-8.52818525E+03+5.15781674E+00+0.00000000E+00    4
sBP5                    C  10H  19              200.000 3000.000 1000.000      1 !\Author: KPS/SNE/SJK !\Comment: [sBP5] [-CONSULT MESSPF FOR LEVELS OF THEORY]
+7.92263541E+00+8.60174725E-02-4.34768830E-05+1.06106105E-08-1.01515616E-12    2
-1.16675182E+04-1.54608583E+01+3.57300737E+00+4.67918914E-02+1.28926577E-04    3
-2.06055458E-07+8.68226616E-11-8.57396609E+03+1.78717271E+01+0.00000000E+00    4
sBP6                    C  10H  19              200.000 3000.000 1000.000      1 !\Author: KPS/SNE/SJK !\Comment: [sBP6] [-CONSULT MESSPF FOR LEVELS OF THEORY]
+8.05388897E+00+8.62610856E-02-4.37516976E-05+1.07061313E-08-1.02640814E-12    2
-1.03664002E+04-1.64748515E+01+5.00464696E+00+3.12916310E-02+1.74582303E-04    3
-2.57204575E-07+1.06568994E-10-7.15183517E+03+1.27957383E+01+0.00000000E+00    4
sBP7                    C  10H  19              200.000 3000.000 1000.000      1 !\Author: KPS/SNE/SJK !\Comment: [sBP7] [-CONSULT MESSPF FOR LEVELS OF THEORY]
+8.42084502E+00+8.54842849E-02-4.31724043E-05+1.05237762E-08-1.00561686E-12    2
-1.01978029E+04-1.86197696E+01+5.94025013E+00+2.69253265E-02+1.85130201E-04    3
-2.69360402E-07+1.11615509E-10-7.09177798E+03+8.06267300E+00+0.00000000E+00    4
sBP8                    C  10H  19              200.000 3000.000 1000.000      1 !\Author: KPS/SNE/SJK !\Comment: [sBP8] [-CONSULT MESSPF FOR LEVELS OF THEORY]
+9.10546718E+00+8.44050181E-02-4.25190561E-05+1.03449950E-08-9.87131211E-13    2
-1.03487063E+04-2.26548702E+01+1.37323914E+00+6.16100379E-02+1.02510268E-04    3
-1.87880218E-07+8.27359668E-11-6.75041238E+03+2.61820836E+01+0.00000000E+00    4

iBCH                    C  10H  20              200.000 3000.000 1000.000      1 !\Author: KPS/SNE/SJK !\Comment: [iBCH] [-CONSULT MESSPF FOR LEVELS OF THEORY]
+7.51089917E+00+9.03349267E-02-4.58132320E-05+1.12098330E-08-1.07468348E-12    2
-3.45630480E+04-1.70566558E+01+8.80659047E-01+5.88614408E-02+1.18657707E-04    3
-2.04302513E-07+8.80704496E-11-3.09706514E+04+2.75326021E+01+0.00000000E+00    4
iBP1                    C  10H  19              200.000 3000.000 1000.000      1 !\Author: KPS/SNE/SJK !\Comment: [iBP1] [-CONSULT MESSPF FOR LEVELS OF THEORY]
+9.08716666E+00+8.41832170E-02-4.23362946E-05+1.02894257E-08-9.81095497E-13    2
-9.76189919E+03-2.24110041E+01+5.22045880E+00+3.99493632E-02+1.45532588E-04    3
-2.24878791E-07+9.44188007E-11-6.68915024E+03+9.13811156E+00+0.00000000E+00    4
iBP2                    C  10H  19              200.000 3000.000 1000.000      1 !\Author: KPS/SNE/SJK !\Comment: [iBP2] [-CONSULT MESSPF FOR LEVELS OF THEORY]
+6.21608017E+00+8.81772909E-02-4.46343272E-05+1.09022212E-08-1.04349638E-12    2
-1.19566724E+04-5.62138428E+00+7.25140050E+00+1.21741877E-02+2.15498369E-04    3
-2.94417471E-07+1.19111282E-10-9.40237263E+03+4.89816725E+00+0.00000000E+00    4
iBP3                    C  10H  19              200.000 3000.000 1000.000      1 !\Author: KPS/SNE/SJK !\Comment: [iBP3] [-CONSULT MESSPF FOR LEVELS OF THEORY]
+7.45124426E+00+8.67529056E-02-4.39353639E-05+1.07398109E-08-1.02883804E-12    2
-1.11473342E+04-1.25915130E+01+5.08839435E+00+2.36911498E-02+1.97824498E-04    3
-2.83163591E-07+1.16539307E-10-7.87800585E+03+1.44880647E+01+0.00000000E+00    4
iBP4                    C  10H  19              200.000 3000.000 1000.000      1 !\Author: KPS/SNE/SJK !\Comment: [iBP4] [-CONSULT MESSPF FOR LEVELS OF THEORY]
+8.06490468E+00+8.59971831E-02-4.35244184E-05+1.06329088E-08-1.01807043E-12    2
-1.22847949E+04-1.58537569E+01+4.63064244E+00+2.84819269E-02+1.88294010E-04    3
-2.75850985E-07+1.14596913E-10-8.86773747E+03+1.60662133E+01+0.00000000E+00    4
iBP5                    C  10H  19              200.000 3000.000 1000.000      1 !\Author: KPS/SNE/SJK !\Comment: [iBP5] [-CONSULT MESSPF FOR LEVELS OF THEORY]
+8.40448230E+00+8.55409385E-02-4.32594040E-05+1.05609978E-08-1.01060763E-12    2
-1.09848763E+04-1.84530386E+01+5.56386964E+00+3.18891939E-02+1.68657220E-04    3
-2.48984070E-07+1.03110192E-10-7.89515937E+03+9.34747314E+00+0.00000000E+00    4
iBP6                    C  10H  19              200.000 3000.000 1000.000      1 !\Author: KPS/SNE/SJK !\Comment: [iBP6] [-CONSULT MESSPF FOR LEVELS OF THEORY]
+9.32116797E+00+8.45365601E-02-4.27687740E-05+1.04452681E-08-9.99932502E-13    2
-1.13977596E+04-2.43801963E+01+8.79536643E-01+6.64110176E-02+9.00414666E-05    3
-1.74019204E-07+7.72214731E-11-7.69160024E+03+2.75857552E+01+0.00000000E+00    4
iBP7                    C  10H  19              200.000 3000.000 1000.000      1 !\Author: KPS/SNE/SJK !\Comment: [iBP7] [-CONSULT MESSPF FOR LEVELS OF THEORY]
+9.50482035E+00+8.42051842E-02-4.25626401E-05+1.03894353E-08-9.94308622E-13    2
-1.11534020E+04-2.50997370E+01-4.72526294E-01+8.33936443E-02+4.03920137E-05    3
-1.18667526E-07+5.58968860E-11-7.53583515E+03+3.19517336E+01+0.00000000E+00    4
