# Supplementary material for: From electronic structure to model application for alkyl cyclohexane combustion chemistry: H-atom abstraction reactions by HȮ2radical
Source: Royal Society of Chemistry journal article supplement (doi:10.1039/d2cp03726b), 2023-01-01
Supplement: d2cp03726b3.pdf [file d2cp03726b3.pdf]

## *Supplementary Material*

# **From electronic structure to model application for alkyl cyclohexanes combustion chemistry: H-atom abstraction reactions by $\text{HO}_2$ radical**

Mingxia Liu<sup>1</sup>, Xin Hui<sup>2</sup>, Xin Xue<sup>2</sup>, Yuzhen Lin<sup>2</sup>, Chong-Wen Zhou<sup>\*1,3</sup>

<sup>1</sup>*School of Energy and Power Engineering, Beihang University, Beijing 100191, PR China*

<sup>2</sup>*National Key Laboratory of Science and Technology on Aero-Engine Aero-thermodynamics, Research Institute of  
Aero-Engine, Beihang University, Beijing, 100191, PR China*

<sup>3</sup>*Combustion Chemistry Centre, School of Chemistry, Ryan Institute, National University of Ireland, Galway,  
Galway H91 TK33, Ireland.*

E-mail address: [chongwen.zhou@universityofgalway.ie](mailto:chongwen.zhou@universityofgalway.ie) (C.-W. Zhou)

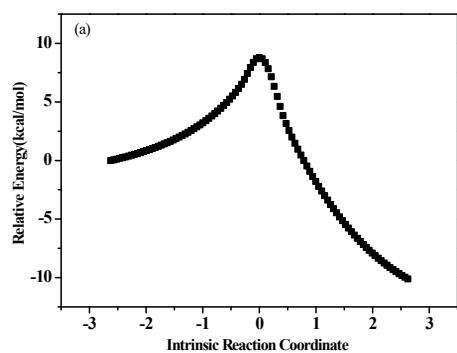

(a)  $\text{MCH} + \text{HO}_2 \rightarrow \text{MP1} + \text{H}_2\text{O}_2$

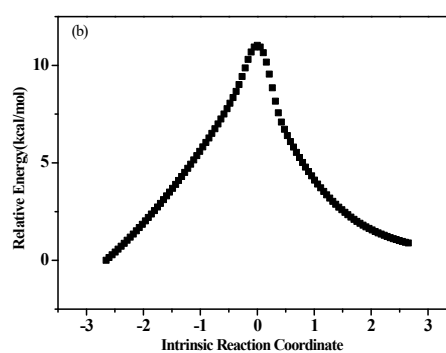

(b)  $\text{MCH} + \text{HO}_2 \rightarrow \text{MP2} + \text{H}_2\text{O}_2$

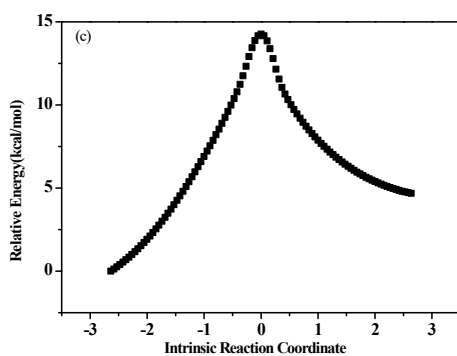

(c)  $\text{MCH} + \text{HO}_2 \rightarrow \text{MP3} + \text{H}_2\text{O}_2$

Fig. S 1. The representative IRC profiles for reactions of  $\text{MCH} + \text{HO}_2 \rightarrow \text{MP1} + \text{H}_2\text{O}_2$  (a, primary carbon site),  $\text{MCH} + \text{HO}_2 \rightarrow \text{MP2} + \text{H}_2\text{O}_2$  (b, tertiary carbon site),  $\text{MCH} + \text{HO}_2 \rightarrow \text{MP3} + \text{H}_2\text{O}_2$  (c, secondary carbon site).

Table S 1

Early or late transition states for these investigated reactions.

| Reactions                                                  | $D_{C-H}(R)$ | $D_{H-O}(P)$ | $D_{C-H}(TS)$ | $D_{H-O}(TS)$ | $\gamma$ | Type  |
|------------------------------------------------------------|--------------|--------------|---------------|---------------|----------|-------|
| MCH+HO <sub>2</sub> = MP1+H <sub>2</sub> O <sub>2</sub>    | 1.09         | 0.96         | 1.34          | 1.18          | 1.14     | Late  |
| MCH+HO <sub>2</sub> = MP2+H <sub>2</sub> O <sub>2</sub>    | 1.10         | 0.96         | 1.29          | 1.23          | 0.70     | Early |
| MCH+HO <sub>2</sub> = MP3+H <sub>2</sub> O <sub>2</sub>    | 1.10         | 0.96         | 1.31          | 1.22          | 0.81     | Early |
| MCH+HO <sub>2</sub> = MP4+H <sub>2</sub> O <sub>2</sub>    | 1.10         | 0.96         | 1.31          | 1.21          | 0.84     | Early |
| MCH+HO <sub>2</sub> = MP5+H <sub>2</sub> O <sub>2</sub>    | 1.10         | 0.96         | 1.31          | 1.21          | 0.84     | Early |
| ECH+HO <sub>2</sub> = EP1+ H <sub>2</sub> O <sub>2</sub>   | 1.09         | 0.96         | 1.34          | 1.18          | 1.14     | Late  |
| ECH+HO <sub>2</sub> = EP2+ H <sub>2</sub> O <sub>2</sub>   | 1.10         | 0.96         | 1.31          | 1.21          | 0.84     | Early |
| ECH+HO <sub>2</sub> = EP3+ H <sub>2</sub> O <sub>2</sub>   | 1.10         | 0.96         | 1.29          | 1.24          | 0.68     | Early |
| ECH+HO <sub>2</sub> = EP4+ H <sub>2</sub> O <sub>2</sub>   | 1.10         | 0.96         | 1.31          | 1.22          | 0.81     | Early |
| ECH+HO <sub>2</sub> = EP5+ H <sub>2</sub> O <sub>2</sub>   | 1.10         | 0.96         | 1.31          | 1.22          | 0.81     | Early |
| ECH+HO <sub>2</sub> = EP6+ H <sub>2</sub> O <sub>2</sub>   | 1.10         | 0.96         | 1.31          | 1.21          | 0.84     | Early |
| nPCH+HO <sub>2</sub> = nP1+ H <sub>2</sub> O <sub>2</sub>  | 1.09         | 0.96         | 1.34          | 1.18          | 1.14     | Late  |
| nPCH+HO <sub>2</sub> = nP2+ H <sub>2</sub> O <sub>2</sub>  | 1.09         | 0.96         | 1.31          | 1.20          | 0.92     | Early |
| nPCH+HO <sub>2</sub> = nP3+ H <sub>2</sub> O <sub>2</sub>  | 1.10         | 0.96         | 1.31          | 1.22          | 0.81     | Early |
| nPCH+HO <sub>2</sub> = nP4+ H <sub>2</sub> O <sub>2</sub>  | 1.10         | 0.96         | 1.29          | 1.24          | 0.68     | Early |
| nPCH+HO <sub>2</sub> = nP5+ H <sub>2</sub> O <sub>2</sub>  | 1.10         | 0.96         | 1.31          | 1.22          | 0.81     | Early |
| nPCH+HO <sub>2</sub> = nP6+ H <sub>2</sub> O <sub>2</sub>  | 1.10         | 0.96         | 1.31          | 1.22          | 0.81     | Early |
| nPCH+HO <sub>2</sub> = nP7+ H <sub>2</sub> O <sub>2</sub>  | 1.10         | 0.96         | 1.31          | 1.21          | 0.84     | Early |
| iPCH+HO <sub>2</sub> = iP1+ H <sub>2</sub> O <sub>2</sub>  | 1.09         | 0.96         | 1.34          | 1.18          | 1.14     | Late  |
| iPCH+HO <sub>2</sub> = iP2+ H <sub>2</sub> O <sub>2</sub>  | 1.10         | 0.96         | 1.29          | 1.24          | 0.68     | Early |
| iPCH+HO <sub>2</sub> = iP3+ H <sub>2</sub> O <sub>2</sub>  | 1.10         | 0.96         | 1.29          | 1.24          | 0.68     | Early |
| iPCH+HO <sub>2</sub> = iP4+ H <sub>2</sub> O <sub>2</sub>  | 1.10         | 0.96         | 1.31          | 1.22          | 0.81     | Early |
| iPCH+HO <sub>2</sub> = iP5+ H <sub>2</sub> O <sub>2</sub>  | 1.10         | 0.96         | 1.31          | 1.22          | 0.81     | Early |
| iPCH+HO <sub>2</sub> = iP6+ H <sub>2</sub> O <sub>2</sub>  | 1.10         | 0.96         | 1.31          | 1.22          | 0.81     | Early |
| iBCH+HO <sub>2</sub> = iBP1+ H <sub>2</sub> O <sub>2</sub> | 1.09         | 0.96         | 1.33          | 1.19          | 1.04     | Late  |
| iBCH+HO <sub>2</sub> = iBP2+ H <sub>2</sub> O <sub>2</sub> | 1.10         | 0.96         | 1.29          | 1.23          | 0.70     | Early |
| iBCH+HO <sub>2</sub> = iBP3+ H <sub>2</sub> O <sub>2</sub> | 1.10         | 0.96         | 1.31          | 1.21          | 0.84     | Early |
| iBCH+HO <sub>2</sub> = iBP4+ H <sub>2</sub> O <sub>2</sub> | 1.10         | 0.96         | 1.30          | 1.23          | 0.74     | Early |
| iBCH+HO <sub>2</sub> = iBP5+ H <sub>2</sub> O <sub>2</sub> | 1.10         | 0.96         | 1.31          | 1.22          | 0.81     | Early |
| iBCH+HO <sub>2</sub> = iBP6+ H <sub>2</sub> O <sub>2</sub> | 1.10         | 0.96         | 1.31          | 1.22          | 0.81     | Early |
| iBCH+HO <sub>2</sub> = iBP7+ H <sub>2</sub> O <sub>2</sub> | 1.10         | 0.96         | 1.31          | 1.21          | 0.84     | Early |
| sBCH+HO <sub>2</sub> = sBP1+ H <sub>2</sub> O <sub>2</sub> | 1.09         | 0.96         | 1.33          | 1.19          | 1.04     | Late  |
| sBCH+HO <sub>2</sub> = sBP2+ H <sub>2</sub> O <sub>2</sub> | 1.09         | 0.96         | 1.32          | 1.21          | 0.92     | Early |
| sBCH+HO <sub>2</sub> = sBP3+ H <sub>2</sub> O <sub>2</sub> | 1.09         | 0.96         | 1.34          | 1.19          | 1.09     | Late  |
| sBCH+HO <sub>2</sub> = sBP4+ H <sub>2</sub> O <sub>2</sub> | 1.10         | 0.96         | 1.28          | 1.25          | 0.62     | Early |
| sBCH+HO <sub>2</sub> = sBP5+ H <sub>2</sub> O <sub>2</sub> | 1.10         | 0.96         | 1.30          | 1.24          | 0.71     | Early |
| sBCH+HO <sub>2</sub> = sBP6+ H <sub>2</sub> O <sub>2</sub> | 1.10         | 0.96         | 1.31          | 1.21          | 0.84     | Early |
| sBCH+HO <sub>2</sub> = sBP7+ H <sub>2</sub> O <sub>2</sub> | 1.10         | 0.96         | 1.30          | 1.22          | 0.77     | Early |
| sBCH+HO <sub>2</sub> = sBP8+ H <sub>2</sub> O <sub>2</sub> | 1.09         | 0.96         | 1.31          | 1.22          | 0.85     | Early |

Table S 2

The influence of tunneling effect on the rate constants at 500-2000 K.

| T(K) | MCH+HO <sub>2</sub> →MP1+H <sub>2</sub> O <sub>2</sub> |          |        | MCH+HO <sub>2</sub> →MP2+H <sub>2</sub> O <sub>2</sub> |          |        | MCH+HO <sub>2</sub> →MP3+H <sub>2</sub> O <sub>2</sub> |          |        |
|------|--------------------------------------------------------|----------|--------|--------------------------------------------------------|----------|--------|--------------------------------------------------------|----------|--------|
|      | K1                                                     | K1'      | K1/K1' | K2                                                     | K2'      | K2/K2' | K3                                                     | K3'      | K3/K3' |
| 500  | 7.02E+02                                               | 2.80E+02 | 2.5    | 1.91E+05                                               | 9.39E+04 | 2.0    | 5.77E+04                                               | 2.67E+04 | 2.2    |
| 600  | 2.69E+04                                               | 1.43E+04 | 1.9    | 2.64E+06                                               | 1.62E+06 | 1.6    | 1.15E+06                                               | 6.74E+05 | 1.7    |
| 700  | 4.12E+05                                               | 2.61E+05 | 1.6    | 1.92E+07                                               | 1.34E+07 | 1.4    | 1.09E+07                                               | 7.40E+06 | 1.5    |
| 800  | 3.48E+06                                               | 2.46E+06 | 1.4    | 9.17E+07                                               | 6.98E+07 | 1.3    | 6.39E+07                                               | 4.74E+07 | 1.3    |
| 900  | 1.94E+07                                               | 1.48E+07 | 1.3    | 3.27E+08                                               | 2.64E+08 | 1.2    | 2.67E+08                                               | 2.11E+08 | 1.3    |
| 1000 | 8.04E+07                                               | 6.50E+07 | 1.2    | 9.42E+08                                               | 7.95E+08 | 1.2    | 8.75E+08                                               | 7.22E+08 | 1.2    |
| 1100 | 2.67E+08                                               | 2.23E+08 | 1.2    | 2.31E+09                                               | 2.01E+09 | 1.2    | 2.39E+09                                               | 2.05E+09 | 1.2    |
| 1200 | 7.43E+08                                               | 6.44E+08 | 1.2    | 5.03E+09                                               | 4.47E+09 | 1.1    | 5.68E+09                                               | 5.00E+09 | 1.1    |
| 1300 | 1.81E+09                                               | 1.60E+09 | 1.1    | 9.90E+09                                               | 8.97E+09 | 1.1    | 1.21E+10                                               | 1.08E+10 | 1.1    |
| 1400 | 3.96E+09                                               | 3.56E+09 | 1.1    | 1.80E+10                                               | 1.66E+10 | 1.1    | 2.34E+10                                               | 2.14E+10 | 1.1    |
| 1500 | 7.91E+09                                               | 7.22E+09 | 1.1    | 3.07E+10                                               | 2.85E+10 | 1.1    | 4.23E+10                                               | 3.91E+10 | 1.1    |
| 1600 | 1.47E+10                                               | 1.35E+10 | 1.1    | 4.96E+10                                               | 4.65E+10 | 1.1    | 7.18E+10                                               | 6.68E+10 | 1.1    |
| 1700 | 2.56E+10                                               | 2.39E+10 | 1.1    | 7.65E+10                                               | 7.22E+10 | 1.1    | 1.16E+11                                               | 1.09E+11 | 1.1    |
| 1800 | 4.25E+10                                               | 4.00E+10 | 1.1    | 1.14E+11                                               | 1.08E+11 | 1.0    | 1.79E+11                                               | 1.70E+11 | 1.1    |
| 1900 | 6.73E+10                                               | 6.38E+10 | 1.1    | 1.63E+11                                               | 1.56E+11 | 1.0    | 2.66E+11                                               | 2.53E+11 | 1.0    |
| 2000 | 1.03E+11                                               | 9.75E+10 | 1.1    | 2.27E+11                                               | 2.19E+11 | 1.0    | 3.83E+11                                               | 3.67E+11 | 1.0    |

KX(X=1-3) represents rate constants with tunneling correction.

KX'(X=1-3) represents rate constants without tunneling correction.

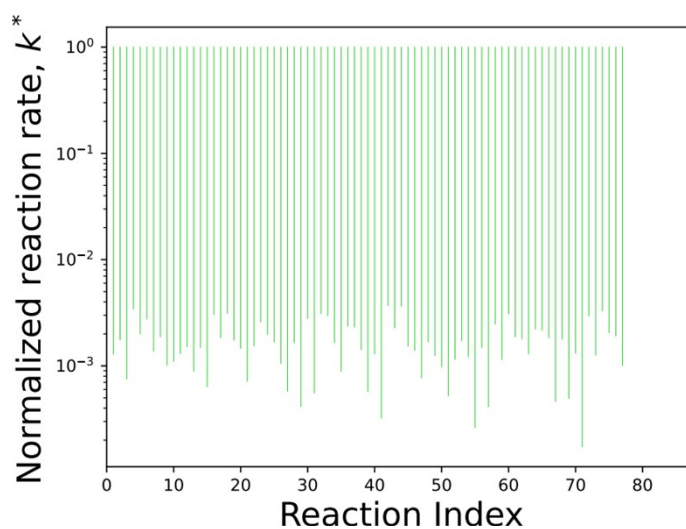

Fig. S 2. The maximum ratio of the rate coefficient to its collision limit.

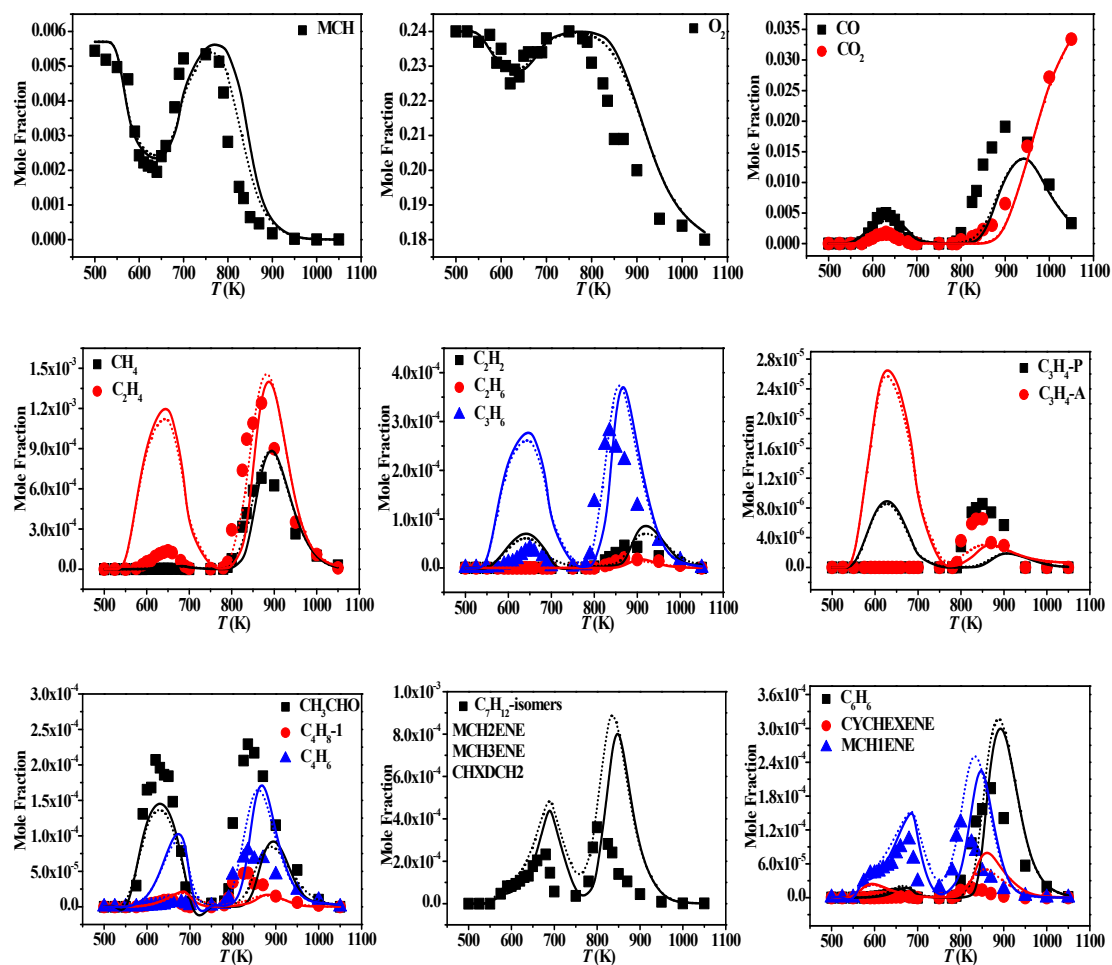

Fig. S 3. Speciation results comparison for the conditions of 0.57% MCH, 24.0% O<sub>2</sub>, 75.43% He,  $\varphi = 0.25$ ,  $p = 1.06$  bar, and at a residence time of 2 s. Symbols: JSR experimental measurements <sup>1</sup>; Simulations from the literature <sup>1</sup> (Dotted lines: the previous model, Solid lines: the updated model).

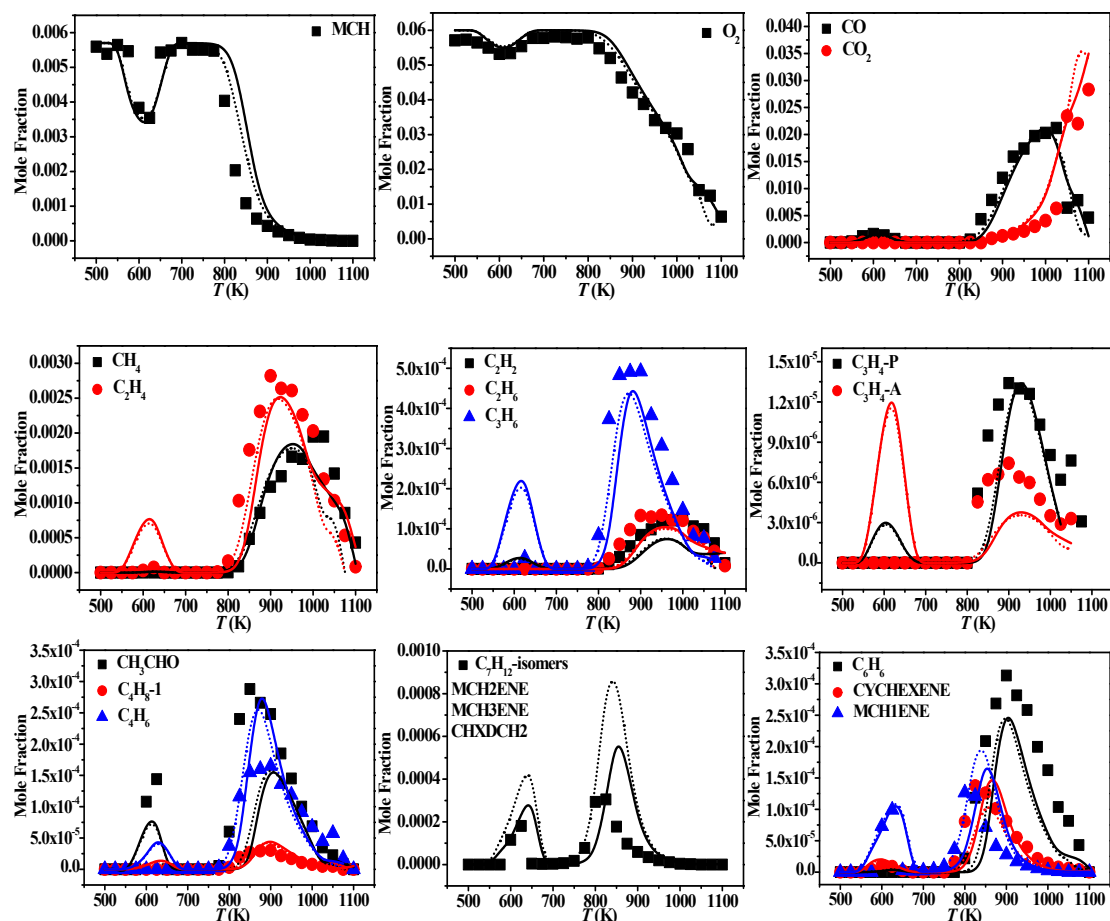

Fig. S 4. Speciation results comparison for the conditions of 0.57% MCH, 6.0% O<sub>2</sub>, 93.43% He,  $\varphi = 1.0$ ,  $p = 1.06$  bar, and at a residence time of 2 s. Symbols: JSR experimental measurements <sup>1</sup>; Simulations from the literature <sup>1</sup> (Dotted lines: the previous model, Solid lines: the updated model).

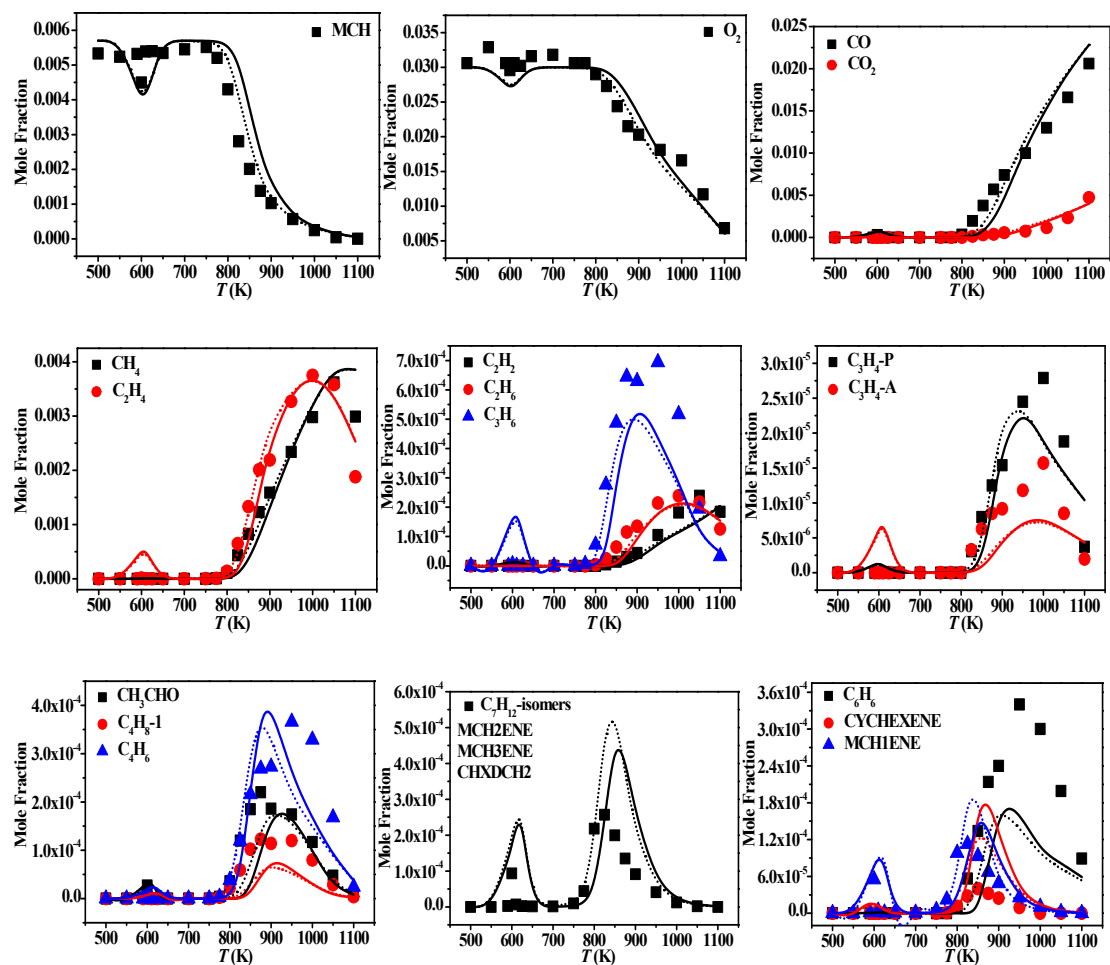

Fig. S 5. Speciation results comparison for the conditions of 0.57% MCH, 3.0% O<sub>2</sub>, 96.43% He,  $\varphi = 2.0$ ,  $p = 1.06$  bar, and at a residence time of 2 s. Symbols: JSR experimental measurements <sup>1</sup>; Simulations from the literature <sup>1</sup> (Dotted lines: the previous model, Solid lines: the updated model).

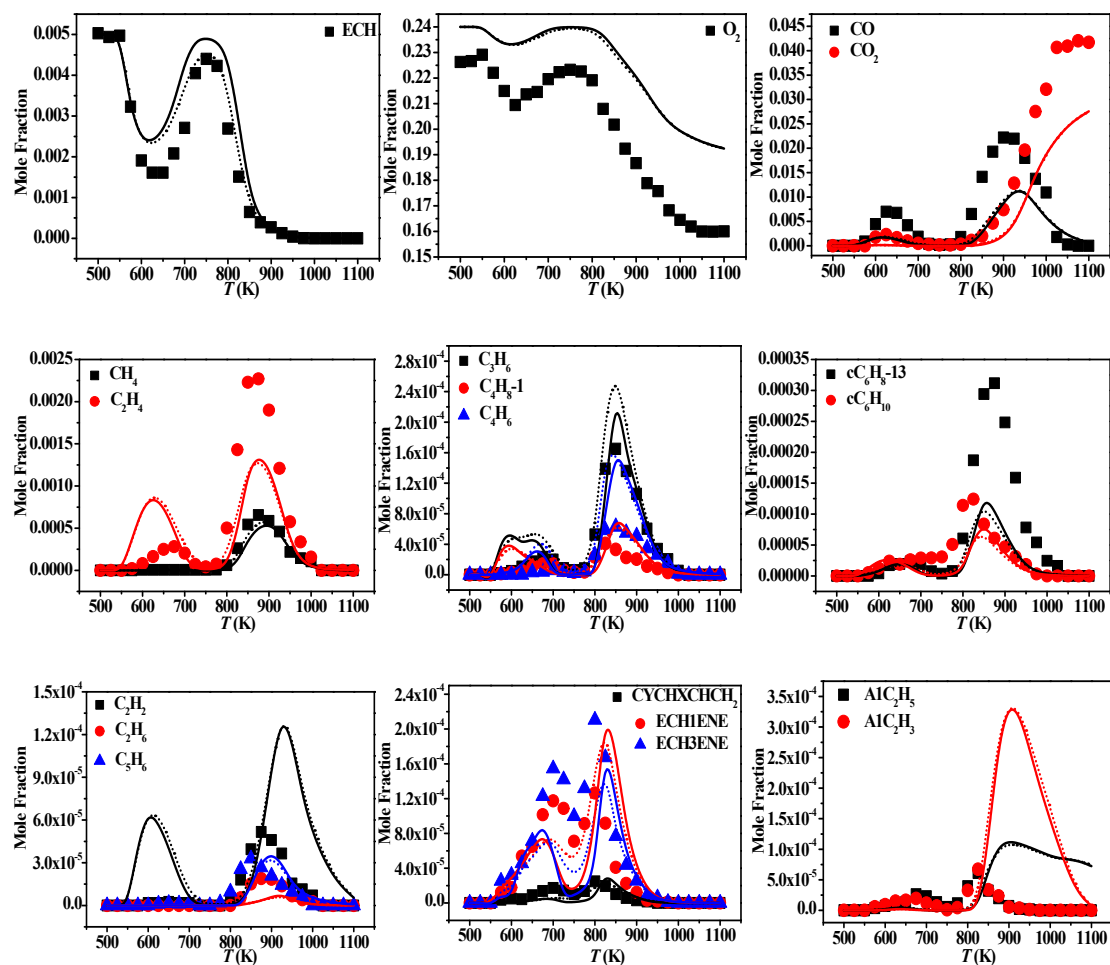

Fig. S 6. Speciation results comparison for the conditions of 0.5% ECH, 24% O<sub>2</sub>, 75.5% He,  $\phi = 0.25$ ,  $p = 1.06$  bar, and at a residence time of 2 s. Symbols: JSR experimental measurements <sup>2</sup>; Simulations from the literature <sup>3</sup> (Dotted lines: the previous model, Solid lines: the updated model).



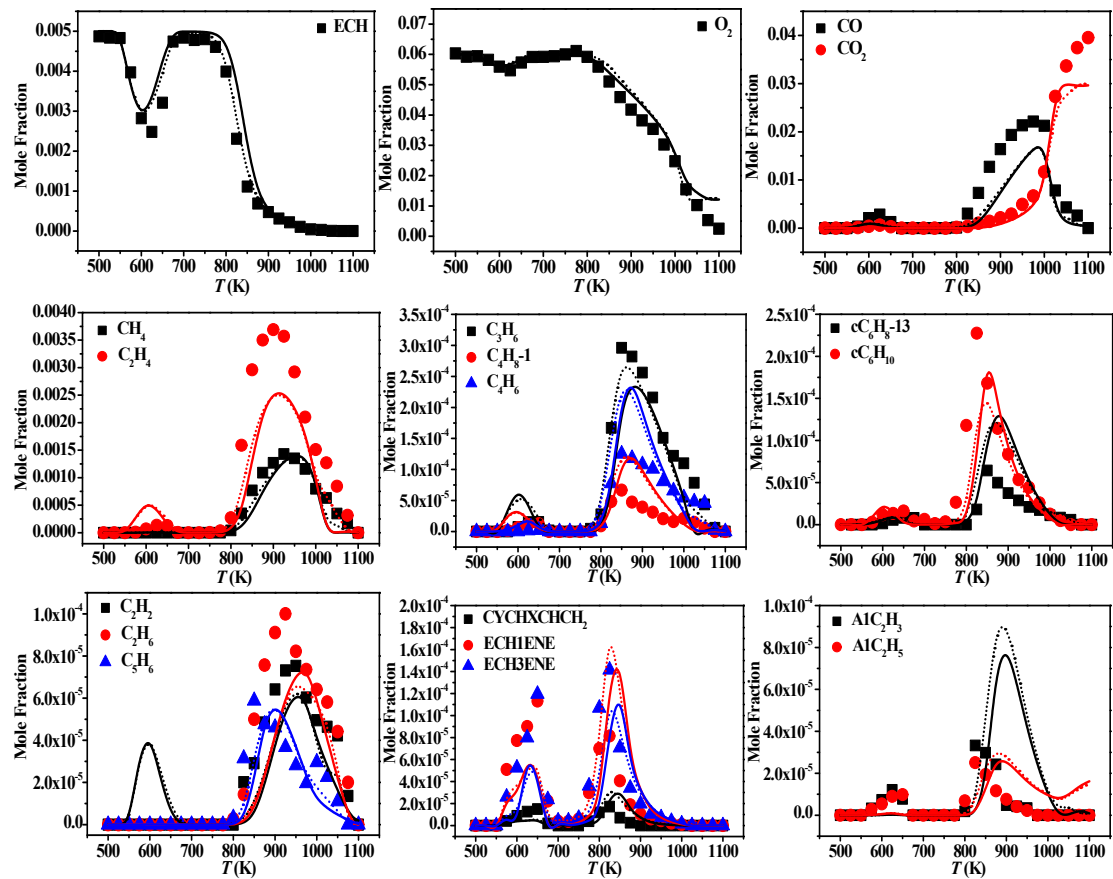

Fig. S 7. Speciation results comparison for the conditions of 0.5% ECH, 6.0% O<sub>2</sub>, 93.5% HE,  $\varphi = 1.0$ ,  $p = 1.06$  bar, and at a residence time of 2 s. Symbols: JSR experimental measurements <sup>2</sup>; Simulations from the literature <sup>3</sup> (Dotted lines: the previous model, Solid lines: the updated model).

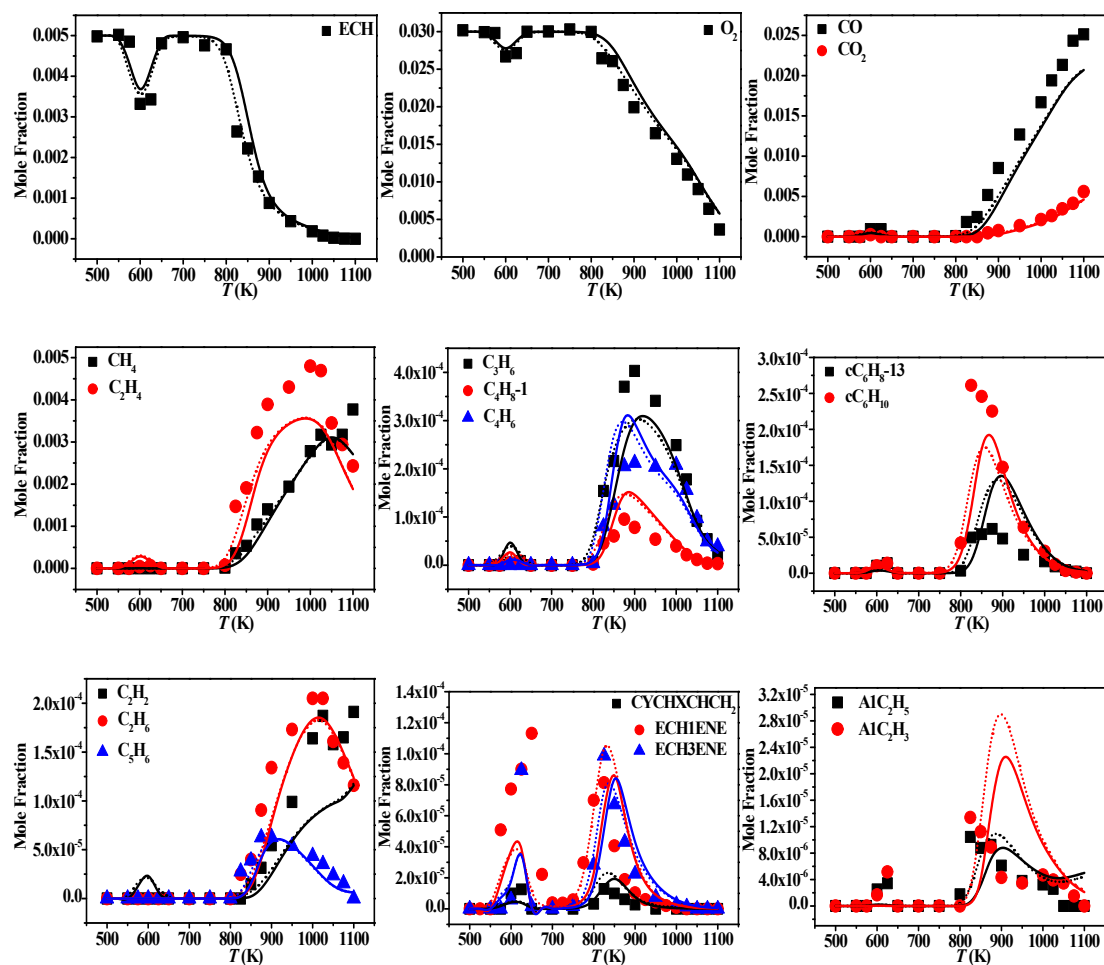

Fig. S 8. Speciation results comparison for the conditions of 0.5% ECH, 3.0% O<sub>2</sub>, 96.5% He,  $\varphi = 2.0$ ,  $p = 1.06$  bar, and at a residence time of 2 s. Symbols: JSR experimental measurements <sup>2</sup>; Simulations from the literature <sup>3</sup> (Dotted lines: the previous model, Solid lines: the updated model).

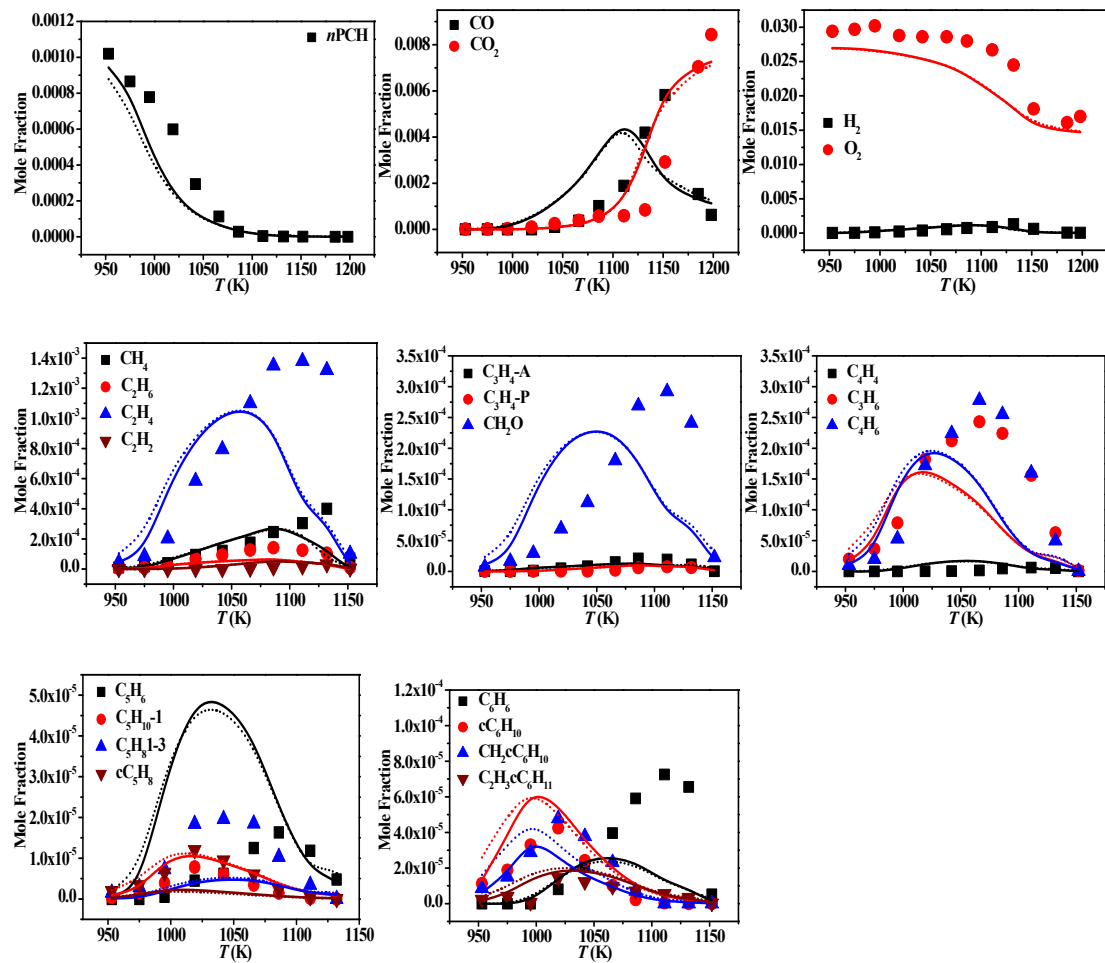

Fig. S 9. Speciation results comparison for the conditions of 0.1% *n*PCH, 2.7% O<sub>2</sub>, 97.2% N<sub>2</sub>,  $\varphi = 0.5$ ,  $p = 1$  bar, and at a residence time of 0.07 s. Symbols: JSR experimental measurements<sup>4</sup>; Simulations from the literature<sup>5</sup> (Dotted lines: the previous model, Solid lines: the updated model).

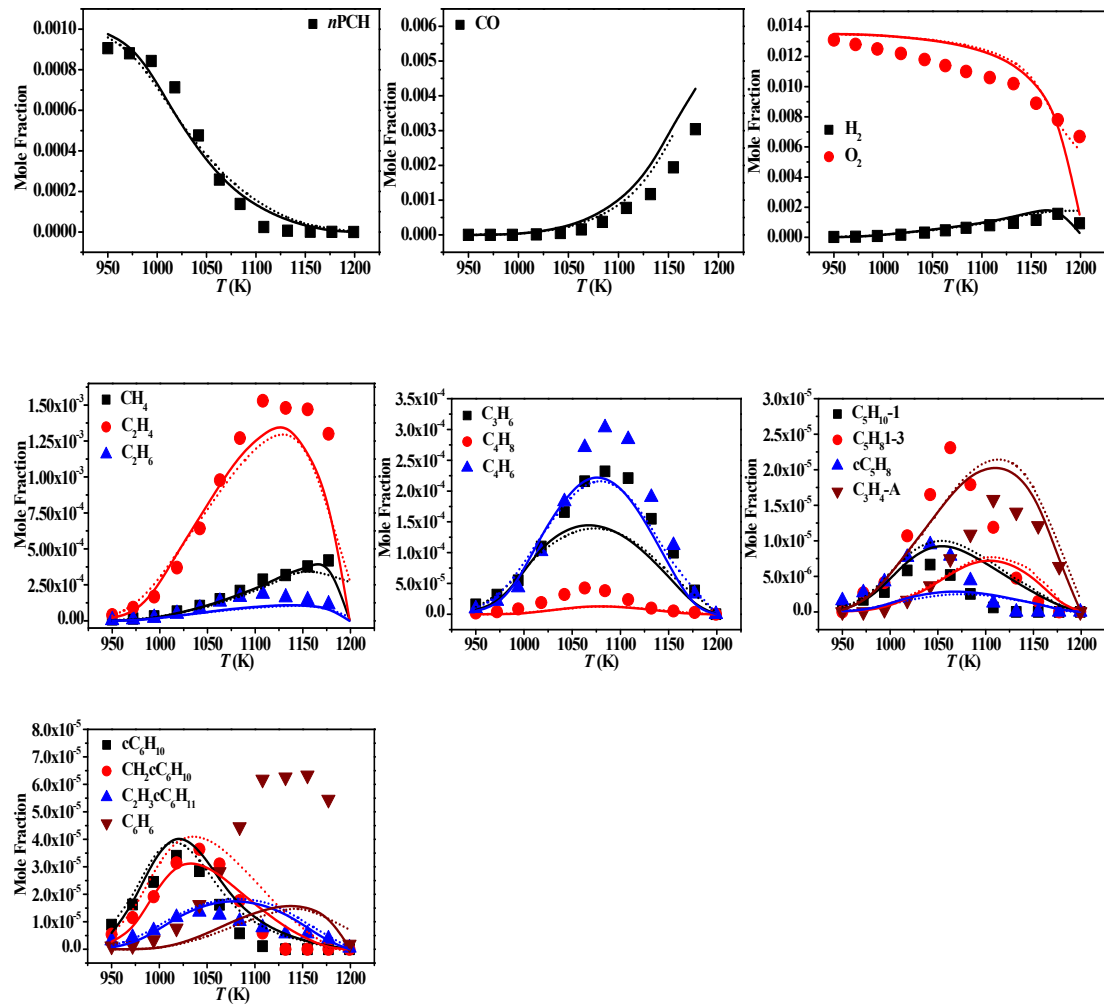

Fig. S 10. Speciation results comparison for the conditions of 0.1% nPCH, 1.35% O<sub>2</sub>, 98.55% N<sub>2</sub>,  $\phi = 1.0$ ,  $p = 1$  bar, and at a residence time of 0.07 s. Symbols: JSR experimental measurements<sup>4</sup>; Simulations from the literature<sup>5</sup> (Dotted lines: the previous model, Solid lines: the updated model).

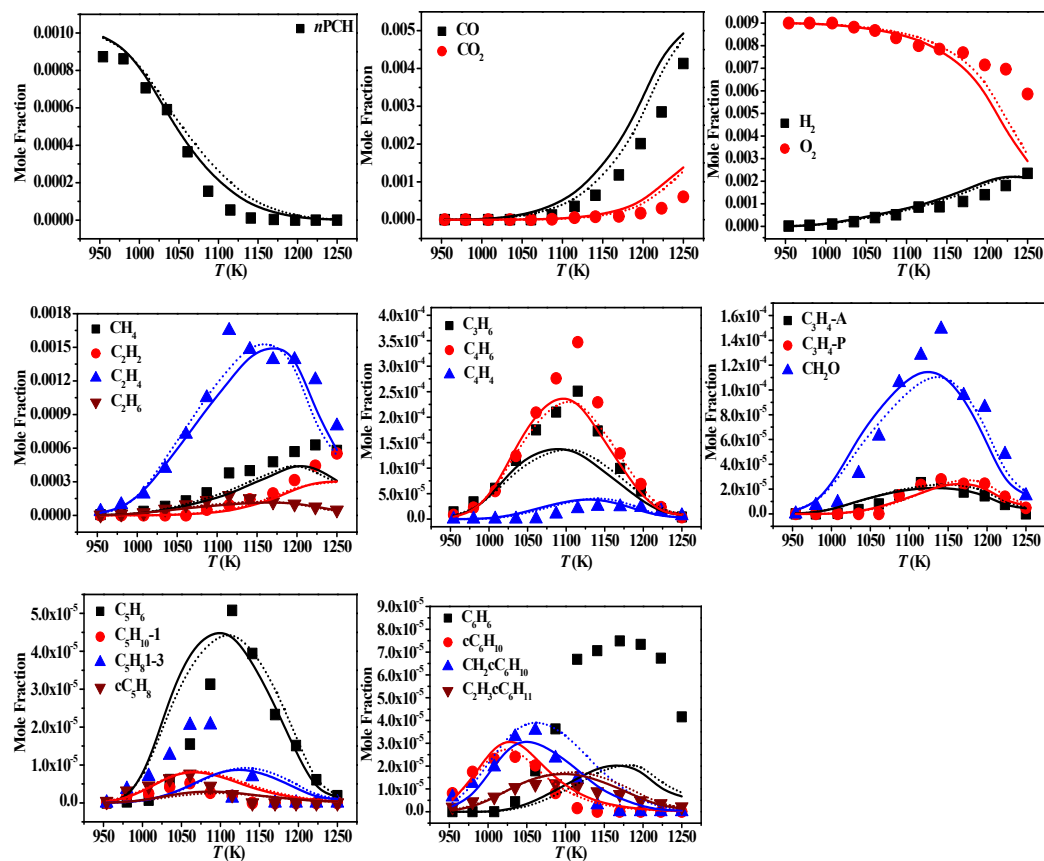

Fig. S 11. Speciation results comparison for the conditions of 0.1% *n*PCH, 0.9% O<sub>2</sub>, 99% N<sub>2</sub>,  $\phi = 1.5$ ,  $p = 1$  bar, and at a residence time of 0.07 s. Symbols: JSR experimental measurements<sup>4</sup>; Simulations from the literature<sup>5</sup> (Dotted lines: the previous model, Solid lines: the updated model).

Table S 3

Structure and SMILES for reactants and products studied in this work.

| Name        | Structure                                                                           | SMILES                     |
|-------------|-------------------------------------------------------------------------------------|----------------------------|
| <b>MCH</b>  |    | <chem>CC1CCCCC1</chem>     |
| MP1         |    | <chem>[C]C1CCCCC1</chem>   |
| MP2         |    | <chem>C[C]1CCCCC1</chem>   |
| MP3         |    | <chem>CC1[C]CCCC1</chem>   |
| MP4         |    | <chem>CC1C[C]CCCC1</chem>  |
| MP5         |    | <chem>CC1CC[C]CC1</chem>   |
| <b>ECH</b>  |    | <chem>CCC1CCCCC1</chem>    |
| EP1         |    | <chem>[C]CC1CCCCC1</chem>  |
| EP2         |  | <chem>C[C]C1CCCCC1</chem>  |
| EP3         |  | <chem>CC[C]1CCCCC1</chem>  |
| EP4         |  | <chem>CCC1[C]CCCC1</chem>  |
| EP5         |  | <chem>CCC1C[C]CCC1</chem>  |
| EP6         |  | <chem>CCC1CC[C]CC1</chem>  |
| <b>nPCH</b> |  | <chem>CCCC1CCCCC1</chem>   |
| nP1         |  | <chem>[C]CCC1CCCCC1</chem> |
| nP2         |  | <chem>C[C]CC1CCCCC1</chem> |
| nP3         |  | <chem>CC[C]C1CCCCC1</chem> |
| nP4         |  | <chem>CCC[C]1CCCCC1</chem> |
| nP5         |  | <chem>CCCC1[C]CCCC1</chem> |

|                    |  |                               |
|--------------------|--|-------------------------------|
| <i>n</i> P6        |  | <chem>CCCC1C[C]CCC1</chem>    |
| <i>n</i> P7        |  | <chem>CCCC1CC[C]CC1</chem>    |
| <b><i>i</i>PCH</b> |  | <chem>CC(C)C1CCCCC1</chem>    |
| <i>i</i> P1        |  | <chem>[C]C(C)C1CCCCC1</chem>  |
| <i>i</i> P2        |  | <chem>C[C](C)C1CCCCC1</chem>  |
| <i>i</i> P3        |  | <chem>CC(C)[C]1CCCCC1</chem>  |
| <i>i</i> P4        |  | <chem>CC(C)C1[C]CCCC1</chem>  |
| <i>i</i> P5        |  | <chem>CC(C)C1C[C]CCC1</chem>  |
| <i>i</i> P6        |  | <chem>CC(C)C1CC[C]CC1</chem>  |
| <b><i>s</i>BCH</b> |  | <chem>CC(CC)C1CCCCC1</chem>   |
| <i>s</i> BP1       |  | <chem>CC(C[C])C1CCCCC1</chem> |
| <i>s</i> BP2       |  | <chem>CC([C]C)C1CCCCC1</chem> |
| <i>s</i> BP3       |  | <chem>[C]C(CC)C1CCCCC1</chem> |
| <i>s</i> BP4       |  | <chem>C[C](CC)C1CCCCC1</chem> |
| <i>s</i> BP5       |  | <chem>CC(CC)[C]1CCCCC1</chem> |
| <i>s</i> BP6       |  | <chem>CC(CC)C1[C]CCCC1</chem> |
| <i>s</i> BP7       |  | <chem>CC(CC)C1C[C]CCC1</chem> |
| <i>s</i> BP8       |  | <chem>CC(CC)C1CC[C]CC1</chem> |
| <b><i>i</i>BCH</b> |  | <chem>CC(C)CC1CCCCC1</chem>   |
| <i>i</i> BP1       |  | <chem>[C]C(C)CC1CCCCC1</chem> |

|              |                                                                                    |                  |
|--------------|------------------------------------------------------------------------------------|------------------|
| <i>i</i> BP2 | 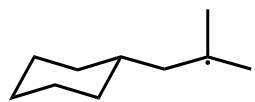  | C[C](C)CC1CCCCC1 |
| <i>i</i> BP3 |   | CC(C)[C]C1CCCCC1 |
| <i>i</i> BP4 |   | CC(C)C[C]1CCCCC1 |
| <i>i</i> BP5 |   | CC(C)CC1[C]CCCC1 |
| <i>i</i> BP6 |   | CC(C)CC1C[C]CCC1 |
| <i>i</i> BP7 |  | CC(C)CC1CC[C]CC1 |

Table S 4

T1 diagnostic values for reactants, transition states, and products calculated in this work.

| Species            | T1    | Species            | T1    | Species            | T1    |
|--------------------|-------|--------------------|-------|--------------------|-------|
| <b>MCH</b>         | 0.009 | <b>ECH</b>         | 0.009 | <b><i>n</i>PCH</b> | 0.009 |
| MP1                | 0.017 | EP1                | 0.016 | <i>n</i> P1        | 0.015 |
| MP2                | 0.014 | EP2                | 0.015 | <i>n</i> P2        | 0.014 |
| MP3                | 0.015 | EP3                | 0.013 | <i>n</i> P3        | 0.014 |
| MP4                | 0.015 | EP4                | 0.014 | <i>n</i> P4        | 0.013 |
| MP5                | 0.015 | EP5                | 0.014 | <i>n</i> P5        | 0.014 |
| TS <sub>aα</sub>   | 0.010 | EP6                | 0.014 | <i>n</i> P6        | 0.014 |
| TS <sub>aα'</sub>  | 0.011 | TS <sub>bα</sub>   | 0.010 | <i>n</i> P7        | 0.014 |
| TS <sub>aβ'</sub>  | 0.011 | TS <sub>bβ</sub>   | 0.011 | TS <sub>cα</sub>   | 0.010 |
| TS <sub>aγ'</sub>  | 0.011 | TS <sub>bα'</sub>  | 0.011 | TS <sub>cβ</sub>   | 0.010 |
| TS <sub>aδ'</sub>  | 0.011 | TS <sub>bβ'</sub>  | 0.011 | TS <sub>cγ</sub>   | 0.011 |
| <b><i>i</i>PCH</b> | 0.009 | TS <sub>bγ'</sub>  | 0.011 | TS <sub>cα'</sub>  | 0.011 |
| <i>i</i> P1        | 0.016 | TS <sub>bδ'</sub>  | 0.011 | TS <sub>cβ'</sub>  | 0.011 |
| <i>i</i> P2        | 0.013 | <b><i>s</i>BCH</b> | 0.009 | TS <sub>cγ'</sub>  | 0.011 |
| <i>i</i> P3        | 0.013 | <i>s</i> BP1       | 0.015 | TS <sub>cδ'</sub>  | 0.011 |
| <i>i</i> P4        | 0.014 | <i>s</i> BP2       | 0.014 | <b><i>i</i>BCH</b> | 0.009 |
| <i>i</i> P5        | 0.014 | <i>s</i> BP3       | 0.015 | <i>i</i> BP1       | 0.015 |
| <i>i</i> P6        | 0.014 | <i>s</i> BP4       | 0.013 | <i>i</i> BP2       | 0.013 |
| TS <sub>dα</sub>   | 0.010 | <i>s</i> BP5       | 0.013 | <i>i</i> BP3       | 0.014 |
| TS <sub>dβ</sub>   | 0.011 | <i>s</i> BP6       | 0.014 | <i>i</i> BP4       | 0.013 |
| TS <sub>dα'</sub>  | 0.011 | <i>s</i> BP7       | 0.013 | <i>i</i> BP5       | 0.014 |
| TS <sub>dβ'</sub>  | 0.011 | <i>s</i> BP8       | 0.014 | <i>i</i> BP6       | 0.013 |
| TS <sub>dγ'</sub>  | 0.011 | TS <sub>cα</sub>   | 0.010 | <i>i</i> BP7       | 0.014 |



|                               |       |                      |       |                    |       |
|-------------------------------|-------|----------------------|-------|--------------------|-------|
| TS <sub>d</sub> δ'            | 0.011 | TS <sub>e</sub> β(S) | 0.011 | TS <sub>r</sub> α  | 0.010 |
| HO <sub>2</sub>               | 0.036 | TS <sub>e</sub> β(P) | 0.010 | TS <sub>f</sub> β  | 0.011 |
| H <sub>2</sub> O <sub>2</sub> | 0.011 | TS <sub>e</sub> γ    | 0.011 | TS <sub>f</sub> γ  | 0.011 |
|                               |       | TS <sub>e</sub> α'   | 0.011 | TS <sub>r</sub> α' | 0.011 |
|                               |       | TS <sub>e</sub> β'   | 0.011 | TS <sub>f</sub> β' | 0.011 |
|                               |       | TS <sub>e</sub> γ'   | 0.011 | TS <sub>f</sub> γ' | 0.011 |
|                               |       | TS <sub>e</sub> δ'   | 0.011 | TS <sub>r</sub> δ' | 0.011 |

Table S 5

The optimized Cartesian coordinate, frequencies, electronic state and point group, rotational constants, and ZPE for all species.

| MCH                            |                             |                 |                 |                 |        |        |        |        |
|--------------------------------|-----------------------------|-----------------|-----------------|-----------------|--------|--------|--------|--------|
| optimized Cartesian coordinate | C                           | -0.292734000000 | -1.255982000000 | 0.169216000000  |        |        |        |        |
|                                | C                           | -1.011560000000 | -0.000173000000 | -0.335054000000 |        |        |        |        |
|                                | C                           | -2.481170000000 | -0.000012000000 | 0.075482000000  |        |        |        |        |
|                                | C                           | -0.292977000000 | 1.255838000000  | 0.169168000000  |        |        |        |        |
|                                | C                           | 1.188347000000  | 1.260708000000  | -0.214201000000 |        |        |        |        |
|                                | C                           | 1.891899000000  | 0.000129000000  | 0.293392000000  |        |        |        |        |
|                                | C                           | 1.188563000000  | -1.260560000000 | -0.214225000000 |        |        |        |        |
|                                | H                           | -0.791080000000 | 2.149591000000  | -0.219912000000 |        |        |        |        |
|                                | H                           | -0.955070000000 | -0.000193000000 | -1.432716000000 |        |        |        |        |
|                                | H                           | -0.383820000000 | -1.294132000000 | 1.263367000000  |        |        |        |        |
|                                | H                           | -0.790672000000 | -2.149864000000 | -0.219786000000 |        |        |        |        |
|                                | H                           | 1.276633000000  | 1.305711000000  | -1.306626000000 |        |        |        |        |
|                                | H                           | 1.678374000000  | 2.155173000000  | 0.179844000000  |        |        |        |        |
|                                | H                           | 2.941421000000  | 0.000224000000  | -0.013084000000 |        |        |        |        |
|                                | H                           | 1.880415000000  | 0.000114000000  | 1.390340000000  |        |        |        |        |
|                                | H                           | 1.276806000000  | -1.305508000000 | -1.306656000000 |        |        |        |        |
|                                | H                           | 1.678767000000  | -2.154951000000 | 0.179765000000  |        |        |        |        |
| H                              | -0.384123000000             | 1.294022000000  | 1.263311000000  |                 |        |        |        |        |
| H                              | -2.571875000000             | 0.000123000000  | 1.166314000000  |                 |        |        |        |        |
| H                              | -2.998891000000             | 0.884823000000  | -0.303520000000 |                 |        |        |        |        |
| H                              | -2.999098000000             | -0.884821000000 | -0.303309000000 |                 |        |        |        |        |
| frequencies                    | 158.2                       | 227.8           | 245.0           | 312.2           | 336.7  | 410.3  | 446.4  | 450.6  |
|                                | 548.0                       | 787.0           | 797.0           | 860.2           | 870.7  | 891.0  | 925.2  | 982.1  |
|                                | 987.6                       | 994.4           | 1056.7          | 1082.2          | 1103.2 | 1122.2 | 1142.8 | 1189.5 |
|                                | 1234.9                      | 1279.0          | 1292.7          | 1297.1          | 1336.3 | 1336.4 | 1368.9 | 1383.2 |
|                                | 1387.0                      | 1387.8          | 1405.1          | 1411.2          | 1480.3 | 1487.5 | 1489.3 | 1494.0 |
|                                | 1501.3                      | 1503.8          | 1508.5          | 3014.2          | 3024.6 | 3032.2 | 3037.4 | 3041.0 |
|                                | 3045.6                      | 3048.2          | 3082.1          | 3085.0          | 3094.5 | 3095.8 | 3100.0 | 3117.4 |
|                                | 3126.0                      |                 |                 |                 |        |        |        |        |
| electronic state               | 1-A                         |                 |                 |                 |        |        |        |        |
| point group                    | C1                          |                 |                 |                 |        |        |        |        |
| rotational constants           | 4.22239                     | 2.19540         | 1.59611         |                 |        |        |        |        |
| ZPE                            | 0.199238 (Hartree/Particle) |                 |                 |                 |        |        |        |        |
| MP1                            |                             |                 |                 |                 |        |        |        |        |
| optimized Cartesian coordinate | C                           | -0.340383000000 | -1.260441000000 | -0.186127000000 |        |        |        |        |
|                                | C                           | -1.062865000000 | -0.000132000000 | 0.312548000000  |        |        |        |        |
|                                | C                           | -2.501170000000 | -0.000011000000 | -0.072937000000 |        |        |        |        |
|                                | C                           | -0.340568000000 | 1.260332000000  | -0.186016000000 |        |        |        |        |
|                                | C                           | 1.135611000000  | -1.261397000000 | 0.215706000000  |        |        |        |        |
|                                | C                           | 1.843500000000  | 0.000105000000  | -0.283934000000 |        |        |        |        |
|                                | C                           | 1.135443000000  | 1.261495000000  | 0.215753000000  |        |        |        |        |
|                                | H                           | -0.844232000000 | -2.151496000000 | 0.200928000000  |        |        |        |        |
|                                | H                           | -0.988479000000 | -0.000203000000 | 1.415618000000  |        |        |        |        |
|                                | H                           | -0.423785000000 | 1.296327000000  | -1.279714000000 |        |        |        |        |
|                                | H                           | -0.844538000000 | 2.151266000000  | 0.201154000000  |        |        |        |        |
|                                | H                           | 1.211004000000  | -1.306795000000 | 1.309105000000  |        |        |        |        |
|                                | H                           | 1.631089000000  | -2.154970000000 | -0.173143000000 |        |        |        |        |
|                                | H                           | 2.889491000000  | 0.000169000000  | 0.034152000000  |        |        |        |        |
|                                | H                           | 1.843962000000  | 0.000121000000  | -1.380821000000 |        |        |        |        |
|                                | H                           | 1.210872000000  | 1.306877000000  | 1.309149000000  |        |        |        |        |

|                                |                             |                 |                 |                 |        |        |        |        |
|--------------------------------|-----------------------------|-----------------|-----------------|-----------------|--------|--------|--------|--------|
|                                | H                           | 1.630784000000  | 2.155147000000  | -0.173091000000 |        |        |        |        |
|                                | H                           | -0.423551000000 | -1.296344000000 | -1.279830000000 |        |        |        |        |
|                                | H                           | -3.055291000000 | -0.928483000000 | -0.135978000000 |        |        |        |        |
|                                | H                           | -3.054727000000 | 0.928689000000  | -0.137485000000 |        |        |        |        |
| frequencies                    | 122.6                       | 161.2           | 239.4           | 317.9           | 332.0  | 408.6  | 421.4  | 450.3  |
|                                | 490.6                       | 559.7           | 794.5           | 796.3           | 862.1  | 882.8  | 892.5  | 916.5  |
|                                | 977.8                       | 990.6           | 1054.3          | 1076.8          | 1100.6 | 1101.0 | 1138.8 | 1164.6 |
|                                | 1230.7                      | 1247.3          | 1288.9          | 1295.3          | 1316.6 | 1330.5 | 1363.9 | 1371.4 |
|                                | 1385.7                      | 1386.3          | 1396.9          | 1463.9          | 1482.2 | 1486.9 | 1489.0 | 1494.0 |
|                                | 1507.9                      | 2939.1          | 3034.1          | 3037.0          | 3038.9 | 3041.8 | 3046.7 | 3087.8 |
|                                | 3089.9                      | 3096.6          | 3097.3          | 3101.5          | 3156.5 | 3261.0 |        |        |
| electronic state               | 2-A                         |                 |                 |                 |        |        |        |        |
| point group                    | C1                          |                 |                 |                 |        |        |        |        |
| rotational constants           | 4.26112                     | 2.29808         | 1.63840         |                 |        |        |        |        |
| ZPE                            | 0.184119 (Hartree/Particle) |                 |                 |                 |        |        |        |        |
| MP2                            |                             |                 |                 |                 |        |        |        |        |
| optimized Cartesian coordinate | C                           | -0.298221000000 | -1.276040000000 | 0.210047000000  |        |        |        |        |
|                                | C                           | -1.017007000000 | 0.000031000000  | -0.104488000000 |        |        |        |        |
|                                | C                           | -2.509157000000 | 0.000036000000  | -0.105031000000 |        |        |        |        |
|                                | H                           | -2.910594000000 | -0.886921000000 | -0.602096000000 |        |        |        |        |
|                                | C                           | -0.298127000000 | 1.276094000000  | 0.209902000000  |        |        |        |        |
|                                | C                           | 1.160800000000  | 1.258211000000  | -0.262942000000 |        |        |        |        |
|                                | C                           | 1.879499000000  | -0.000101000000 | 0.225503000000  |        |        |        |        |
|                                | C                           | 1.160641000000  | -1.258252000000 | -0.263073000000 |        |        |        |        |
|                                | H                           | -0.832057000000 | 2.127533000000  | -0.223370000000 |        |        |        |        |
|                                | H                           | -0.306918000000 | -1.435294000000 | 1.304197000000  |        |        |        |        |
|                                | H                           | -0.832267000000 | -2.127461000000 | -0.223126000000 |        |        |        |        |
|                                | H                           | 1.180562000000  | 1.278015000000  | -1.358355000000 |        |        |        |        |
|                                | H                           | 1.677905000000  | 2.155991000000  | 0.085942000000  |        |        |        |        |
|                                | H                           | 2.917940000000  | -0.000123000000 | -0.116322000000 |        |        |        |        |
|                                | H                           | 1.904270000000  | -0.000175000000 | 1.322697000000  |        |        |        |        |
|                                | H                           | 1.180076000000  | -1.277675000000 | -1.358503000000 |        |        |        |        |
|                                | H                           | 1.677752000000  | -2.156202000000 | 0.085355000000  |        |        |        |        |
|                                | H                           | -0.306947000000 | 1.435426000000  | 1.304046000000  |        |        |        |        |
|                                | H                           | -2.910605000000 | 0.887113000000  | -0.601871000000 |        |        |        |        |
|                                | H                           | -2.909688000000 | -0.000102000000 | 0.921898000000  |        |        |        |        |
| frequencies                    | 95.7                        | 135.1           | 214.4           | 271.7           | 335.7  | 367.6  | 416.5  | 447.1  |
|                                | 547.8                       | 748.0           | 788.7           | 851.5           | 861.4  | 902.9  | 926.8  | 970.4  |
|                                | 1000.4                      | 1002.3          | 1051.8          | 1094.5          | 1106.1 | 1119.0 | 1175.5 | 1194.4 |
|                                | 1263.1                      | 1283.4          | 1302.0          | 1314.4          | 1359.8 | 1367.7 | 1378.3 | 1387.0 |
|                                | 1406.4                      | 1412.5          | 1466.3          | 1474.9          | 1483.0 | 1487.0 | 1491.0 | 1491.3 |
|                                | 1503.8                      | 2940.3          | 2943.9          | 2979.1          | 3036.2 | 3049.6 | 3051.3 | 3076.8 |
|                                | 3077.1                      | 3079.8          | 3097.5          | 3099.1          | 3102.8 | 3123.8 |        |        |
| electronic state               | 2-A                         |                 |                 |                 |        |        |        |        |
| point group                    | C1                          |                 |                 |                 |        |        |        |        |
| rotational constants           | 4.25351                     | 2.22687         | 1.59260         |                 |        |        |        |        |
| ZPE                            | 0.184883 (Hartree/Particle) |                 |                 |                 |        |        |        |        |
| MP3                            |                             |                 |                 |                 |        |        |        |        |
| optimized Cartesian coordinate | C                           | -0.311456000000 | -1.240400000000 | -0.149845000000 |        |        |        |        |
|                                | C                           | 1.877475000000  | -0.002466000000 | -0.339103000000 |        |        |        |        |
|                                | C                           | 1.201808000000  | 1.289036000000  | 0.147751000000  |        |        |        |        |
|                                | C                           | -0.273655000000 | 1.246469000000  | -0.078896000000 |        |        |        |        |
|                                | C                           | -1.034017000000 | 0.027482000000  | 0.337726000000  |        |        |        |        |
|                                | H                           | 2.933847000000  | -0.001827000000 | -0.057647000000 |        |        |        |        |
|                                | H                           | -0.404078000000 | -1.292925000000 | -1.242073000000 |        |        |        |        |
|                                | H                           | -0.809967000000 | -2.124702000000 | 0.259278000000  |        |        |        |        |
|                                | H                           | 1.406598000000  | 1.393982000000  | 1.227131000000  |        |        |        |        |
|                                | H                           | 1.644496000000  | 2.162979000000  | -0.335681000000 |        |        |        |        |
|                                | H                           | -0.816804000000 | 2.161314000000  | -0.290033000000 |        |        |        |        |
|                                | H                           | -1.036893000000 | -0.015748000000 | 1.442290000000  |        |        |        |        |
|                                | H                           | 1.831998000000  | -0.037755000000 | -1.433232000000 |        |        |        |        |
|                                | C                           | 1.169844000000  | -1.232829000000 | 0.231010000000  |        |        |        |        |

|                                |                             |                 |                 |                 |        |        |        |        |
|--------------------------------|-----------------------------|-----------------|-----------------|-----------------|--------|--------|--------|--------|
|                                | H                           | 1.654304000000  | -2.146127000000 | -0.124608000000 |        |        |        |        |
|                                | H                           | 1.262467000000  | -1.229013000000 | 1.324397000000  |        |        |        |        |
|                                | C                           | -2.482927000000 | 0.064109000000  | -0.142298000000 |        |        |        |        |
|                                | H                           | -2.516510000000 | 0.100857000000  | -1.234966000000 |        |        |        |        |
|                                | H                           | -3.028381000000 | -0.824139000000 | 0.185378000000  |        |        |        |        |
|                                | H                           | -3.003515000000 | 0.944696000000  | 0.241691000000  |        |        |        |        |
| frequencies                    | 127.7                       | 192.4           | 239.1           | 307.5           | 325.2  | 341.6  | 415.4  | 448.6  |
|                                | 504.3                       | 598.2           | 785.7           | 822.2           | 871.2  | 885.2  | 909.2  | 975.5  |
|                                | 987.3                       | 1001.1          | 1069.5          | 1091.9          | 1095.6 | 1117.2 | 1142.4 | 1176.0 |
|                                | 1231.9                      | 1264.6          | 1279.8          | 1317.5          | 1326.0 | 1355.6 | 1359.1 | 1373.6 |
|                                | 1386.3                      | 1409.0          | 1418.3          | 1473.4          | 1484.8 | 1490.4 | 1498.8 | 1502.1 |
|                                | 1503.9                      | 2940.0          | 2962.4          | 3034.6          | 3039.5 | 3051.7 | 3052.4 | 3088.0 |
|                                | 3096.0                      | 3098.4          | 3103.0          | 3123.9          | 3130.3 | 3188.5 |        |        |
| electronic state               | 2-A                         |                 |                 |                 |        |        |        |        |
| point group                    | C1                          |                 |                 |                 |        |        |        |        |
| rotational constants           | 4.36165                     | 2.21154         | 1.60912         |                 |        |        |        |        |
| ZPE                            | 0.184562 (Hartree/Particle) |                 |                 |                 |        |        |        |        |
|                                |                             |                 |                 |                 |        |        |        |        |
| MP4                            |                             |                 |                 |                 |        |        |        |        |
| optimized Cartesian coordinate | C                           | -0.993804000000 | -0.020406000000 | -0.344740000000 |        |        |        |        |
|                                | C                           | 1.248498000000  | -1.201630000000 | -0.229874000000 |        |        |        |        |
|                                | C                           | 1.938103000000  | 0.092751000000  | 0.228768000000  |        |        |        |        |
|                                | C                           | 1.143842000000  | 1.293499000000  | -0.167134000000 |        |        |        |        |
|                                | H                           | 1.777172000000  | -2.070477000000 | 0.171186000000  |        |        |        |        |
|                                | H                           | -0.937491000000 | -0.056465000000 | -1.440466000000 |        |        |        |        |
|                                | H                           | 2.032018000000  | 0.057154000000  | 1.327968000000  |        |        |        |        |
|                                | H                           | 2.955189000000  | 0.149221000000  | -0.165876000000 |        |        |        |        |
|                                | H                           | 1.646043000000  | 2.222365000000  | -0.406877000000 |        |        |        |        |
|                                | H                           | 1.300959000000  | -1.265949000000 | -1.322275000000 |        |        |        |        |
|                                | C                           | -0.218435000000 | -1.222391000000 | 0.202804000000  |        |        |        |        |
|                                | H                           | -0.697207000000 | -2.150280000000 | -0.125743000000 |        |        |        |        |
|                                | H                           | -0.275900000000 | -1.207514000000 | 1.300170000000  |        |        |        |        |
|                                | C                           | -0.322726000000 | 1.287508000000  | 0.111883000000  |        |        |        |        |
|                                | H                           | -0.495986000000 | 1.383288000000  | 1.199491000000  |        |        |        |        |
|                                | H                           | -0.814607000000 | 2.146282000000  | -0.353429000000 |        |        |        |        |
|                                | C                           | -2.459863000000 | -0.061342000000 | 0.074279000000  |        |        |        |        |
|                                | H                           | -3.009428000000 | 0.796850000000  | -0.321017000000 |        |        |        |        |
|                                | H                           | -2.948071000000 | -0.970938000000 | -0.284292000000 |        |        |        |        |
|                                | H                           | -2.546390000000 | -0.041478000000 | 1.165244000000  |        |        |        |        |
| frequencies                    | 147.5                       | 173.9           | 236.8           | 281.8           | 311.2  | 364.5  | 417.3  | 435.3  |
|                                | 474.0                       | 616.6           | 783.5           | 851.5           | 854.8  | 876.7  | 899.0  | 966.7  |
|                                | 985.0                       | 993.0           | 1063.7          | 1104.1          | 1112.1 | 1117.8 | 1128.0 | 1167.6 |
|                                | 1237.3                      | 1268.3          | 1287.8          | 1314.5          | 1333.4 | 1358.8 | 1366.4 | 1369.9 |
|                                | 1398.2                      | 1402.3          | 1410.9          | 1468.4          | 1474.2 | 1488.5 | 1497.3 | 1501.7 |
|                                | 1502.8                      | 2945.6          | 2960.4          | 3021.0          | 3035.2 | 3048.5 | 3051.4 | 3084.1 |
|                                | 3088.1                      | 3099.8          | 3101.1          | 3118.0          | 3126.8 | 3205.0 |        |        |
| electronic state               | 2-A                         |                 |                 |                 |        |        |        |        |
| point group                    | C1                          |                 |                 |                 |        |        |        |        |
| rotational constants           | 4.39359                     | 2.22106         | 1.61101         |                 |        |        |        |        |
| ZPE                            | 0.184368 (Hartree/Particle) |                 |                 |                 |        |        |        |        |
|                                |                             |                 |                 |                 |        |        |        |        |
| MP5                            |                             |                 |                 |                 |        |        |        |        |
| optimized Cartesian coordinate | C                           | -0.262871000000 | 1.255031000000  | -0.209744000000 |        |        |        |        |
|                                | C                           | -0.959759000000 | 0.000105000000  | 0.324900000000  |        |        |        |        |
|                                | C                           | -2.443865000000 | 0.000116000000  | -0.030600000000 |        |        |        |        |
|                                | H                           | -2.946870000000 | -0.884728000000 | 0.367456000000  |        |        |        |        |
|                                | C                           | -0.263115000000 | -1.254917000000 | -0.209900000000 |        |        |        |        |
|                                | C                           | 1.228195000000  | -1.279992000000 | 0.157529000000  |        |        |        |        |
|                                | C                           | 1.900443000000  | -0.000214000000 | -0.216289000000 |        |        |        |        |
|                                | C                           | 1.228640000000  | 1.279822000000  | 0.157394000000  |        |        |        |        |
|                                | H                           | -0.759834000000 | -2.151263000000 | 0.174544000000  |        |        |        |        |
|                                | H                           | -0.861356000000 | 0.000019000000  | 1.420042000000  |        |        |        |        |
|                                | H                           | -0.365631000000 | 1.272214000000  | -1.301984000000 |        |        |        |        |
|                                | H                           | -0.759333000000 | 2.151427000000  | 0.174914000000  |        |        |        |        |

|                                |                             |                 |                 |                 |        |        |        |        |
|--------------------------------|-----------------------------|-----------------|-----------------|-----------------|--------|--------|--------|--------|
|                                | H                           | 1.308194000000  | -1.434970000000 | 1.247433000000  |        |        |        |        |
|                                | H                           | 1.724982000000  | -2.133104000000 | -0.310492000000 |        |        |        |        |
|                                | H                           | 2.946661000000  | -0.000200000000 | -0.496046000000 |        |        |        |        |
|                                | H                           | 1.308922000000  | 1.434991000000  | 1.247256000000  |        |        |        |        |
|                                | H                           | 1.725540000000  | 2.132718000000  | -0.310897000000 |        |        |        |        |
|                                | H                           | -0.365698000000 | -1.271870000000 | -1.302157000000 |        |        |        |        |
|                                | H                           | -2.574670000000 | 0.000131000000  | -1.117287000000 |        |        |        |        |
|                                | H                           | -2.946912000000 | 0.884931000000  | 0.367477000000  |        |        |        |        |
| frequencies                    | 136.6                       | 214.9           | 238.9           | 244.5           | 314.6  | 359.0  | 427.8  | 454.4  |
|                                | 459.7                       | 637.1           | 783.9           | 793.8           | 879.8  | 900.4  | 932.4  | 962.8  |
|                                | 974.9                       | 1005.1          | 1040.8          | 1100.5          | 1102.1 | 1123.1 | 1137.7 | 1172.4 |
|                                | 1241.0                      | 1256.9          | 1293.3          | 1318.9          | 1330.4 | 1343.3 | 1371.8 | 1381.7 |
|                                | 1400.4                      | 1404.8          | 1413.1          | 1470.7          | 1479.1 | 1482.5 | 1497.2 | 1503.0 |
|                                | 1503.9                      | 2959.5          | 2961.9          | 3013.3          | 3036.8 | 3041.7 | 3049.4 | 3087.0 |
|                                | 3089.9                      | 3097.4          | 3097.4          | 3118.5          | 3126.8 | 3205.4 |        |        |
| electronic state               | 2-A                         |                 |                 |                 |        |        |        |        |
| point group                    | C1                          |                 |                 |                 |        |        |        |        |
| rotational constants           | 4.25724                     | 2.27085         | 1.61438         |                 |        |        |        |        |
| ZPE                            | 0.184473 (Hartree/Particle) |                 |                 |                 |        |        |        |        |
|                                |                             |                 |                 |                 |        |        |        |        |
| TS <sub>a</sub> α              |                             |                 |                 |                 |        |        |        |        |
| optimized Cartesian coordinate | C                           | -1.221339000000 | 1.398539000000  | 0.152412000000  |        |        |        |        |
|                                | C                           | 0.074768000000  | 0.572781000000  | 0.022708000000  |        |        |        |        |
|                                | C                           | 1.187708000000  | 1.403101000000  | -0.551895000000 |        |        |        |        |
|                                | H                           | 2.279307000000  | 0.632461000000  | -0.445973000000 |        |        |        |        |
|                                | O                           | 3.130339000000  | -0.157840000000 | -0.246681000000 |        |        |        |        |
|                                | O                           | 2.793802000000  | -0.725666000000 | 0.974443000000  |        |        |        |        |
|                                | H                           | 2.358076000000  | -1.551789000000 | 0.725245000000  |        |        |        |        |
|                                | C                           | -0.188821000000 | -0.683496000000 | -0.815143000000 |        |        |        |        |
|                                | C                           | -2.355130000000 | 0.557015000000  | 0.744374000000  |        |        |        |        |
|                                | C                           | -2.599811000000 | -0.707452000000 | -0.081821000000 |        |        |        |        |
|                                | C                           | -1.316660000000 | -1.529347000000 | -0.222410000000 |        |        |        |        |
|                                | H                           | -1.036610000000 | 2.281700000000  | 0.770304000000  |        |        |        |        |
|                                | H                           | 0.365365000000  | 0.261845000000  | 1.035947000000  |        |        |        |        |
|                                | H                           | -0.462934000000 | -0.372637000000 | -1.832025000000 |        |        |        |        |
|                                | H                           | 0.730888000000  | -1.269935000000 | -0.913932000000 |        |        |        |        |
|                                | H                           | -2.091139000000 | 0.272761000000  | 1.770005000000  |        |        |        |        |
|                                | H                           | -3.268937000000 | 1.154001000000  | 0.806006000000  |        |        |        |        |
|                                | H                           | -3.389757000000 | -1.310438000000 | 0.373362000000  |        |        |        |        |
|                                | H                           | -2.952693000000 | -0.421772000000 | -1.080249000000 |        |        |        |        |
|                                | H                           | -1.013140000000 | -1.893851000000 | 0.766944000000  |        |        |        |        |
|                                | H                           | -1.495453000000 | -2.410426000000 | -0.844164000000 |        |        |        |        |
|                                | H                           | -1.510614000000 | 1.756981000000  | -0.843581000000 |        |        |        |        |
|                                | H                           | 1.478056000000  | 2.280324000000  | 0.025953000000  |        |        |        |        |
|                                | H                           | 1.132156000000  | 1.591976000000  | -1.625287000000 |        |        |        |        |
| frequencies                    | -1823.8                     | 59.6            | 72.5            | 86.5            | 157.9  | 217.2  | 245.6  | 315.2  |
|                                | 334.9                       | 366.0           | 419.5           | 436.8           | 448.3  | 523.4  | 549.9  | 601.5  |
|                                | 792.3                       | 797.9           | 858.3           | 871.6           | 897.0  | 926.7  | 979.2  | 980.9  |
|                                | 1021.4                      | 1052.8          | 1071.6          | 1079.2          | 1095.6 | 1116.7 | 1127.3 | 1174.8 |
|                                | 1181.9                      | 1225.0          | 1278.9          | 1291.2          | 1294.7 | 1330.4 | 1340.8 | 1363.6 |
|                                | 1370.5                      | 1385.8          | 1387.4          | 1406.1          | 1409.1 | 1454.1 | 1472.2 | 1485.5 |
|                                | 1487.6                      | 1491.1          | 1497.4          | 1511.0          | 3022.7 | 3032.3 | 3037.4 | 3041.4 |
|                                | 3043.3                      | 3048.5          | 3081.3          | 3093.8          | 3096.6 | 3098.4 | 3099.0 | 3103.5 |
|                                | 3181.6                      | 3804.8          |                 |                 |        |        |        |        |
| electronic state               | 2-A                         |                 |                 |                 |        |        |        |        |
| point group                    | C1                          |                 |                 |                 |        |        |        |        |
| rotational constants           | 2.67919                     | 0.85066         | 0.74417         |                 |        |        |        |        |
| ZPE                            | 0.209881 (Hartree/Particle) |                 |                 |                 |        |        |        |        |
|                                |                             |                 |                 |                 |        |        |        |        |
| TS <sub>a</sub> α'             |                             |                 |                 |                 |        |        |        |        |
| optimized Cartesian coordinate | C                           | 0.132043000000  | -0.080399000000 | 1.331571000000  |        |        |        |        |
|                                | C                           | -0.238894000000 | 0.841933000000  | 0.187529000000  |        |        |        |        |
|                                | C                           | -1.205953000000 | 1.940840000000  | 0.554046000000  |        |        |        |        |
|                                | H                           | -2.109182000000 | 1.527395000000  | 1.009252000000  |        |        |        |        |

|                                |                             |                 |                 |                 |        |        |        |        |
|--------------------------------|-----------------------------|-----------------|-----------------|-----------------|--------|--------|--------|--------|
|                                | H                           | -0.939759000000 | 0.080819000000  | -0.584628000000 |        |        |        |        |
|                                | O                           | -1.697673000000 | -0.704650000000 | -1.158735000000 |        |        |        |        |
|                                | O                           | -2.515848000000 | -1.164417000000 | -0.138664000000 |        |        |        |        |
|                                | H                           | -2.116219000000 | -2.008697000000 | 0.109867000000  |        |        |        |        |
|                                | C                           | 0.938549000000  | 1.263580000000  | -0.670092000000 |        |        |        |        |
|                                | C                           | 1.794433000000  | 0.072147000000  | -1.108597000000 |        |        |        |        |
|                                | C                           | 2.218250000000  | -0.774039000000 | 0.093347000000  |        |        |        |        |
|                                | C                           | 0.995442000000  | -1.259192000000 | 0.874146000000  |        |        |        |        |
|                                | H                           | 0.583650000000  | 1.827475000000  | -1.537718000000 |        |        |        |        |
|                                | H                           | 0.689567000000  | 0.510140000000  | 2.075846000000  |        |        |        |        |
|                                | H                           | -0.777024000000 | -0.428081000000 | 1.832640000000  |        |        |        |        |
|                                | H                           | 1.212199000000  | -0.549948000000 | -1.797805000000 |        |        |        |        |
|                                | H                           | 2.671385000000  | 0.424794000000  | -1.657005000000 |        |        |        |        |
|                                | H                           | 2.818682000000  | -1.625621000000 | -0.236565000000 |        |        |        |        |
|                                | H                           | 2.853498000000  | -0.172408000000 | 0.755320000000  |        |        |        |        |
|                                | H                           | 0.399955000000  | -1.910839000000 | 0.222598000000  |        |        |        |        |
|                                | H                           | 1.300954000000  | -1.857055000000 | 1.736475000000  |        |        |        |        |
|                                | H                           | 1.556012000000  | 1.957142000000  | -0.076888000000 |        |        |        |        |
|                                | H                           | -1.495102000000 | 2.524248000000  | -0.322466000000 |        |        |        |        |
|                                | H                           | -0.743669000000 | 2.623954000000  | 1.278567000000  |        |        |        |        |
| frequencies                    | -1685.6                     | 39.6            | 87.8            | 97.9            | 152.7  | 190.9  | 209.6  | 247.5  |
|                                | 311.8                       | 341.0           | 382.3           | 398.6           | 426.8  | 452.2  | 536.0  | 579.1  |
|                                | 784.7                       | 789.2           | 857.6           | 869.8           | 898.2  | 929.6  | 977.8  | 998.8  |
|                                | 1001.4                      | 1054.2          | 1077.0          | 1092.8          | 1109.2 | 1125.0 | 1168.9 | 1177.1 |
|                                | 1193.3                      | 1271.9          | 1276.5          | 1296.1          | 1312.7 | 1350.0 | 1368.5 | 1383.1 |
|                                | 1386.6                      | 1398.0          | 1404.3          | 1409.9          | 1462.7 | 1467.5 | 1476.2 | 1487.0 |
|                                | 1489.7                      | 1492.8          | 1494.8          | 1505.6          | 2992.4 | 2998.2 | 3028.1 | 3036.2 |
|                                | 3043.7                      | 3054.2          | 3081.7          | 3089.0          | 3100.9 | 3101.4 | 3105.0 | 3106.7 |
|                                | 3138.8                      | 3806.2          |                 |                 |        |        |        |        |
| electronic state               | 2-A                         |                 |                 |                 |        |        |        |        |
| point group                    | C1                          |                 |                 |                 |        |        |        |        |
| rotational constants           | 1.90283                     | 1.17881         | 1.01958         |                 |        |        |        |        |
| ZPE                            | 0.209534 (Hartree/Particle) |                 |                 |                 |        |        |        |        |
|                                |                             |                 |                 |                 |        |        |        |        |
| $TS_{\alpha\beta'}$            |                             |                 |                 |                 |        |        |        |        |
| optimized Cartesian coordinate | C                           | 1.476941000000  | 0.224401000000  | -0.898149000000 |        |        |        |        |
|                                | C                           | -0.225792000000 | 1.874575000000  | -0.048186000000 |        |        |        |        |
|                                | C                           | -0.402811000000 | 1.052484000000  | 1.231708000000  |        |        |        |        |
|                                | C                           | -0.005044000000 | -0.390949000000 | 1.028811000000  |        |        |        |        |
|                                | H                           | -0.868798000000 | -0.834621000000 | 0.149836000000  |        |        |        |        |
|                                | O                           | -1.707065000000 | -1.115898000000 | -0.683868000000 |        |        |        |        |
|                                | O                           | -2.773709000000 | -0.278612000000 | -0.385327000000 |        |        |        |        |
|                                | H                           | -3.361660000000 | -0.840705000000 | 0.135334000000  |        |        |        |        |
|                                | C                           | 1.335985000000  | -0.633236000000 | 0.365421000000  |        |        |        |        |
|                                | H                           | -0.428409000000 | 2.928421000000  | 0.158263000000  |        |        |        |        |
|                                | H                           | 0.773923000000  | -0.150023000000 | -1.652196000000 |        |        |        |        |
|                                | H                           | 2.484330000000  | 0.102421000000  | -1.307178000000 |        |        |        |        |
|                                | H                           | 0.230799000000  | 1.473814000000  | 2.027669000000  |        |        |        |        |
|                                | H                           | -1.434865000000 | 1.114791000000  | 1.586764000000  |        |        |        |        |
|                                | H                           | -0.198896000000 | -1.042158000000 | 1.885379000000  |        |        |        |        |
|                                | H                           | 2.106247000000  | -0.301995000000 | 1.082134000000  |        |        |        |        |
|                                | H                           | -0.964153000000 | 1.540918000000  | -0.784662000000 |        |        |        |        |
|                                | C                           | 1.181095000000  | 1.699644000000  | -0.622483000000 |        |        |        |        |
|                                | H                           | 1.287400000000  | 2.280843000000  | -1.542025000000 |        |        |        |        |
|                                | H                           | 1.918513000000  | 2.092146000000  | 0.089137000000  |        |        |        |        |
|                                | C                           | 1.553639000000  | -2.115429000000 | 0.069033000000  |        |        |        |        |
|                                | H                           | 0.798069000000  | -2.475304000000 | -0.635529000000 |        |        |        |        |
|                                | H                           | 2.537363000000  | -2.284321000000 | -0.374863000000 |        |        |        |        |
|                                | H                           | 1.482253000000  | -2.717090000000 | 0.978566000000  |        |        |        |        |
| frequencies                    | -1748.8                     | 59.6            | 83.5            | 95.7            | 147.6  | 201.3  | 234.1  | 266.0  |
|                                | 314.1                       | 344.5           | 393.4           | 417.0           | 444.1  | 479.2  | 555.0  | 599.0  |
|                                | 780.6                       | 796.1           | 866.7           | 869.5           | 889.6  | 922.1  | 981.1  | 986.6  |
|                                | 1003.0                      | 1058.8          | 1070.5          | 1096.8          | 1101.1 | 1120.3 | 1156.0 | 1170.5 |
|                                | 1199.6                      | 1244.2          | 1271.8          | 1289.9          | 1318.2 | 1331.3 | 1353.7 | 1366.8 |
|                                | 1383.0                      | 1388.1          | 1397.1          | 1406.3          | 1415.0 | 1460.2 | 1467.6 | 1487.7 |
|                                | 1492.9                      | 1502.4          | 1504.8          | 1507.5          | 2974.2 | 2998.8 | 3035.7 | 3046.4 |
|                                | 3052.4                      | 3065.1          | 3091.6          | 3094.8          | 3098.5 | 3100.2 | 3111.9 | 3124.3 |

|                                |                             |                 |                 |                 |        |        |        |        |
|--------------------------------|-----------------------------|-----------------|-----------------|-----------------|--------|--------|--------|--------|
|                                | 3131.2                      | 3820.5          |                 |                 |        |        |        |        |
| electronic state               | 2-A                         |                 |                 |                 |        |        |        |        |
| point group                    | C1                          |                 |                 |                 |        |        |        |        |
| rotational constants           | 1.71520                     | 1.31513         | 0.96311         |                 |        |        |        |        |
| ZPE                            | 0.209676 (Hartree/Particle) |                 |                 |                 |        |        |        |        |
| TS <sub>a</sub> γ'             |                             |                 |                 |                 |        |        |        |        |
| optimized Cartesian coordinate | C                           | 1.434209000000  | -0.405498000000 | -0.330459000000 |        |        |        |        |
|                                | C                           | -0.139797000000 | 1.572659000000  | -0.511872000000 |        |        |        |        |
|                                | C                           | -0.708307000000 | 1.283284000000  | 0.880019000000  |        |        |        |        |
|                                | C                           | -0.516699000000 | -0.164626000000 | 1.266983000000  |        |        |        |        |
|                                | H                           | -1.244050000000 | -0.813989000000 | 0.394412000000  |        |        |        |        |
|                                | O                           | -1.933613000000 | -1.294027000000 | -0.481803000000 |        |        |        |        |
|                                | O                           | -2.897110000000 | -0.324630000000 | -0.724681000000 |        |        |        |        |
|                                | H                           | -3.656973000000 | -0.629487000000 | -0.212468000000 |        |        |        |        |
|                                | H                           | -0.204561000000 | 2.642930000000  | -0.722974000000 |        |        |        |        |
|                                | H                           | 0.814333000000  | -0.945711000000 | -1.057059000000 |        |        |        |        |
|                                | H                           | -0.189640000000 | 1.907514000000  | 1.624347000000  |        |        |        |        |
|                                | H                           | -1.766463000000 | 1.553471000000  | 0.924640000000  |        |        |        |        |
|                                | H                           | -0.983464000000 | -0.449987000000 | 2.211876000000  |        |        |        |        |
|                                | H                           | -0.756537000000 | 1.058912000000  | -1.256448000000 |        |        |        |        |
|                                | C                           | 1.307453000000  | 1.091220000000  | -0.629780000000 |        |        |        |        |
|                                | H                           | 1.693372000000  | 1.298777000000  | -1.632309000000 |        |        |        |        |
|                                | H                           | 1.940757000000  | 1.647251000000  | 0.075227000000  |        |        |        |        |
|                                | C                           | 0.880443000000  | -0.708533000000 | 1.067842000000  |        |        |        |        |
|                                | H                           | 1.542937000000  | -0.241860000000 | 1.814834000000  |        |        |        |        |
|                                | H                           | 0.904636000000  | -1.785081000000 | 1.261954000000  |        |        |        |        |
|                                | C                           | 2.876986000000  | -0.883053000000 | -0.459838000000 |        |        |        |        |
|                                | H                           | 2.961131000000  | -1.953266000000 | -0.255061000000 |        |        |        |        |
|                                | H                           | 3.263130000000  | -0.699649000000 | -1.465256000000 |        |        |        |        |
|                                | H                           | 3.521452000000  | -0.353292000000 | 0.248784000000  |        |        |        |        |
| frequencies                    | -1747.7                     | 59.5            | 89.5            | 99.8            | 167.3  | 218.2  | 238.5  | 244.7  |
|                                | 315.5                       | 328.9           | 407.3           | 430.5           | 441.4  | 473.2  | 555.1  | 606.8  |
|                                | 783.1                       | 800.4           | 851.5           | 871.7           | 890.2  | 923.9  | 982.8  | 986.1  |
|                                | 996.2                       | 1062.5          | 1072.7          | 1084.2          | 1122.8 | 1124.8 | 1154.2 | 1167.6 |
|                                | 1204.4                      | 1245.7          | 1279.6          | 1290.3          | 1314.8 | 1336.3 | 1357.5 | 1375.8 |
|                                | 1386.0                      | 1388.6          | 1406.6          | 1408.8          | 1412.7 | 1462.0 | 1464.6 | 1469.7 |
|                                | 1491.1                      | 1502.0          | 1503.4          | 1504.2          | 2989.2 | 2997.9 | 3023.1 | 3044.6 |
|                                | 3050.7                      | 3064.9          | 3083.8          | 3089.5          | 3097.7 | 3111.4 | 3111.8 | 3119.0 |
|                                | 3129.5                      | 3819.7          |                 |                 |        |        |        |        |
| electronic state               | 2-A                         |                 |                 |                 |        |        |        |        |
| point group                    | C1                          |                 |                 |                 |        |        |        |        |
| rotational constants           | 2.23608                     | 0.99617         | 0.90570         |                 |        |        |        |        |
| ZPE                            | 0.209793 (Hartree/Particle) |                 |                 |                 |        |        |        |        |
| TS <sub>a</sub> δ'             |                             |                 |                 |                 |        |        |        |        |
| optimized Cartesian coordinate | C                           | -1.174160000000 | 0.799531000000  | -0.893279000000 |        |        |        |        |
|                                | C                           | -1.712316000000 | -0.173587000000 | 0.160261000000  |        |        |        |        |
|                                | C                           | -2.642983000000 | -1.205516000000 | -0.469903000000 |        |        |        |        |
|                                | H                           | -3.041698000000 | -1.890621000000 | 0.282449000000  |        |        |        |        |
|                                | C                           | -0.545875000000 | -0.853630000000 | 0.883734000000  |        |        |        |        |
|                                | C                           | 0.402114000000  | 0.161574000000  | 1.528038000000  |        |        |        |        |
|                                | C                           | 0.857614000000  | 1.207383000000  | 0.536894000000  |        |        |        |        |
|                                | H                           | 1.548228000000  | 0.520697000000  | -0.337126000000 |        |        |        |        |
|                                | O                           | 2.136325000000  | -0.233937000000 | -1.084768000000 |        |        |        |        |
|                                | O                           | 2.571817000000  | -1.259834000000 | -0.257318000000 |        |        |        |        |
|                                | H                           | 3.488108000000  | -1.021571000000 | -0.066539000000 |        |        |        |        |
|                                | C                           | -0.243948000000 | 1.848611000000  | -0.277601000000 |        |        |        |        |
|                                | H                           | -0.927229000000 | -1.540142000000 | 1.645546000000  |        |        |        |        |
|                                | H                           | -2.281386000000 | 0.407576000000  | 0.900221000000  |        |        |        |        |
|                                | H                           | -0.621138000000 | 0.226905000000  | -1.647732000000 |        |        |        |        |
|                                | H                           | -2.004262000000 | 1.293514000000  | -1.407098000000 |        |        |        |        |
|                                | H                           | -0.116092000000 | 0.674706000000  | 2.353046000000  |        |        |        |        |
|                                | H                           | 1.263461000000  | -0.348156000000 | 1.967473000000  |        |        |        |        |

|                                |                             |                 |                 |                 |        |        |        |        |
|--------------------------------|-----------------------------|-----------------|-----------------|-----------------|--------|--------|--------|--------|
|                                | H                           | 1.602736000000  | 1.906130000000  | 0.922524000000  |        |        |        |        |
|                                | H                           | -0.827155000000 | 2.501152000000  | 0.390244000000  |        |        |        |        |
|                                | H                           | 0.178990000000  | 2.494951000000  | -1.051143000000 |        |        |        |        |
|                                | H                           | 0.017371000000  | -1.456138000000 | 0.161302000000  |        |        |        |        |
|                                | H                           | -2.101812000000 | -1.799928000000 | -1.212314000000 |        |        |        |        |
|                                | H                           | -3.485942000000 | -0.725091000000 | -0.973032000000 |        |        |        |        |
| frequencies                    | -1758.3                     | 52.9            | 77.5            | 100.7           | 161.8  | 216.0  | 235.5  | 267.3  |
|                                | 308.0                       | 314.9           | 389.3           | 426.8           | 450.9  | 459.9  | 553.0  | 611.5  |
|                                | 783.5                       | 788.9           | 850.9           | 875.2           | 896.5  | 928.0  | 973.8  | 983.7  |
|                                | 994.5                       | 1054.1          | 1072.3          | 1095.6          | 1112.4 | 1121.2 | 1156.2 | 1169.0 |
|                                | 1202.0                      | 1234.5          | 1275.1          | 1298.9          | 1323.9 | 1338.6 | 1348.8 | 1369.7 |
|                                | 1381.0                      | 1388.1          | 1405.2          | 1408.7          | 1413.8 | 1458.5 | 1464.6 | 1477.0 |
|                                | 1486.5                      | 1500.1          | 1503.8          | 1505.2          | 2997.6 | 3002.2 | 3011.9 | 3046.2 |
|                                | 3049.2                      | 3053.8          | 3093.5          | 3094.9          | 3096.1 | 3098.6 | 3112.4 | 3120.5 |
|                                | 3127.0                      | 3820.8          |                 |                 |        |        |        |        |
| electronic state               | 2-A                         |                 |                 |                 |        |        |        |        |
| point group                    | C1                          |                 |                 |                 |        |        |        |        |
| rotational constants           | 2.04192                     | 1.04822         | 0.94170         |                 |        |        |        |        |
| ZPE                            | 0.209571 (Hartree/Particle) |                 |                 |                 |        |        |        |        |
| ECH                            |                             |                 |                 |                 |        |        |        |        |
| optimized Cartesian coordinate | C                           | -0.074986000000 | 1.099610000000  | -0.275741000000 |        |        |        |        |
|                                | C                           | -0.559667000000 | -0.260824000000 | 0.238941000000  |        |        |        |        |
|                                | C                           | 0.434976000000  | -1.357051000000 | -0.160390000000 |        |        |        |        |
|                                | C                           | 1.858560000000  | -1.047843000000 | 0.306795000000  |        |        |        |        |
|                                | C                           | 2.325622000000  | 0.308721000000  | -0.223238000000 |        |        |        |        |
|                                | C                           | 1.350643000000  | 1.413829000000  | 0.185339000000  |        |        |        |        |
|                                | H                           | 0.102933000000  | -2.319761000000 | 0.241252000000  |        |        |        |        |
|                                | H                           | -0.585636000000 | -0.213576000000 | 1.338278000000  |        |        |        |        |
|                                | H                           | -0.108521000000 | 1.088403000000  | -1.374278000000 |        |        |        |        |
|                                | H                           | -0.750555000000 | 1.893490000000  | 0.053613000000  |        |        |        |        |
|                                | H                           | 1.882378000000  | -1.032530000000 | 1.403344000000  |        |        |        |        |
|                                | H                           | 2.541727000000  | -1.839127000000 | -0.013661000000 |        |        |        |        |
|                                | H                           | 3.331972000000  | 0.534859000000  | 0.139571000000  |        |        |        |        |
|                                | H                           | 2.383183000000  | 0.266266000000  | -1.317893000000 |        |        |        |        |
|                                | H                           | 1.358996000000  | 1.512468000000  | 1.277859000000  |        |        |        |        |
|                                | H                           | 1.673055000000  | 2.376493000000  | -0.220762000000 |        |        |        |        |
|                                | H                           | 0.427885000000  | -1.452253000000 | -1.254798000000 |        |        |        |        |
|                                | C                           | -1.967755000000 | -0.605924000000 | -0.253575000000 |        |        |        |        |
|                                | H                           | -2.223529000000 | -1.608439000000 | 0.106241000000  |        |        |        |        |
|                                | H                           | -1.951719000000 | -0.667349000000 | -1.348686000000 |        |        |        |        |
|                                | C                           | -3.049277000000 | 0.378089000000  | 0.190072000000  |        |        |        |        |
|                                | H                           | -3.031541000000 | 0.511020000000  | 1.275609000000  |        |        |        |        |
|                                | H                           | -2.916715000000 | 1.359589000000  | -0.268930000000 |        |        |        |        |
|                                | H                           | -4.042610000000 | 0.018810000000  | -0.085971000000 |        |        |        |        |
| frequencies                    | 83.6                        | 131.8           | 220.1           | 232.8           | 246.7  | 334.9  | 368.1  | 431.1  |
|                                | 445.1                       | 458.5           | 541.5           | 762.5           | 797.4  | 805.8  | 858.8  | 890.2  |
|                                | 904.5                       | 935.8           | 937.5           | 1003.9          | 1033.4 | 1058.4 | 1061.1 | 1081.5 |
|                                | 1109.4                      | 1126.1          | 1145.6          | 1190.1          | 1221.2 | 1261.2 | 1290.4 | 1293.1 |
|                                | 1310.0                      | 1320.3          | 1343.4          | 1366.9          | 1377.7 | 1385.1 | 1387.4 | 1394.1 |
|                                | 1407.6                      | 1416.5          | 1480.3          | 1486.1          | 1489.4 | 1491.5 | 1495.1 | 1504.0 |
|                                | 1509.2                      | 1514.8          | 3001.8          | 3023.2          | 3028.7 | 3036.6 | 3039.9 | 3041.1 |
|                                | 3045.3                      | 3059.0          | 3075.2          | 3084.3          | 3094.0 | 3094.6 | 3097.6 | 3100.2 |
|                                | 3127.8                      | 3138.8          |                 |                 |        |        |        |        |
| electronic state               | 1-A                         |                 |                 |                 |        |        |        |        |
| point group                    | C1                          |                 |                 |                 |        |        |        |        |
| rotational constants           | 3.83172                     | 1.30285         | 1.05166         |                 |        |        |        |        |
| ZPE                            | 0.227885 (Hartree/Particle) |                 |                 |                 |        |        |        |        |
| EPI                            |                             |                 |                 |                 |        |        |        |        |
| optimized Cartesian coordinate | C                           | 0.369891000000  | -1.357220000000 | 0.153849000000  |        |        |        |        |
|                                | C                           | -0.609745000000 | -0.246281000000 | -0.235640000000 |        |        |        |        |
|                                | C                           | -2.028028000000 | -0.559842000000 | 0.260399000000  |        |        |        |        |
|                                | C                           | -3.057149000000 | 0.398265000000  | -0.231182000000 |        |        |        |        |

|                                |                             |                |                |                |        |        |        |        |
|--------------------------------|-----------------------------|----------------|----------------|----------------|--------|--------|--------|--------|
|                                | C                           | -0.11635000000 | 1.10434700000  | 0.29394200000  |        |        |        |        |
|                                | C                           | 1.30658400000  | 1.41529600000  | -0.17446200000 |        |        |        |        |
|                                | C                           | 2.27425700000  | 0.29779700000  | 0.22042800000  |        |        |        |        |
|                                | C                           | 1.79466100000  | -1.05302700000 | -0.31463600000 |        |        |        |        |
|                                | H                           | -0.80393300000 | 1.89825700000  | -0.01254300000 |        |        |        |        |
|                                | H                           | -0.63979000000 | -0.18985400000 | -1.33405300000 |        |        |        |        |
|                                | H                           | 0.36339100000  | -1.46196500000 | 1.24738500000  |        |        |        |        |
|                                | H                           | 0.03001200000  | -2.31332100000 | -0.25692200000 |        |        |        |        |
|                                | H                           | 1.30978400000  | 1.52389300000  | -1.26604800000 |        |        |        |        |
|                                | H                           | 1.63936300000  | 2.37121100000  | 0.23898100000  |        |        |        |        |
|                                | H                           | 3.28055100000  | 0.51685300000  | -0.14681500000 |        |        |        |        |
|                                | H                           | 2.33800100000  | 0.24837100000  | 1.31443700000  |        |        |        |        |
|                                | H                           | 1.81484800000  | -1.03233900000 | -1.41116400000 |        |        |        |        |
|                                | H                           | 2.47372200000  | -1.85043100000 | -0.00081900000 |        |        |        |        |
|                                | H                           | -0.13874100000 | 1.07445900000  | 1.39221200000  |        |        |        |        |
|                                | H                           | -2.28483300000 | -1.58255700000 | -0.06039700000 |        |        |        |        |
|                                | H                           | -3.04547700000 | 0.71801400000  | -1.26627500000 |        |        |        |        |
|                                | H                           | -3.91520100000 | 0.66658300000  | 0.36933700000  |        |        |        |        |
|                                | H                           | -2.02642000000 | -0.58317900000 | 1.35649800000  |        |        |        |        |
| frequencies                    | 102.0                       | 127.8          | 149.2          | 218.2          | 236.8  | 327.5  | 368.1  | 423.3  |
|                                | 445.0                       | 449.4          | 485.9          | 545.6          | 789.6  | 800.1  | 813.9  | 860.8  |
|                                | 885.4                       | 907.6          | 939.3          | 963.8          | 997.9  | 1056.6 | 1072.7 | 1084.6 |
|                                | 1094.5                      | 1118.7         | 1130.7         | 1174.5         | 1193.7 | 1239.6 | 1276.7 | 1291.1 |
|                                | 1298.9                      | 1312.3         | 1337.1         | 1367.0         | 1373.9 | 1383.8 | 1387.5 | 1388.9 |
|                                | 1405.9                      | 1464.0         | 1473.4         | 1483.3         | 1487.3 | 1489.9 | 1494.9 | 1508.8 |
|                                | 2976.0                      | 3006.2         | 3024.2         | 3030.5         | 3036.9 | 3041.4 | 3045.5 | 3063.1 |
|                                | 3083.5                      | 3091.2         | 3094.9         | 3095.4         | 3099.7 | 3167.1 | 3272.8 |        |
| electronic state               | 2-A                         |                |                |                |        |        |        |        |
| point group                    | C1                          |                |                |                |        |        |        |        |
| rotational constants           | 3.86881                     | 1.34882        | 1.08617        |                |        |        |        |        |
| ZPE                            | 0.212681 (Hartree/Particle) |                |                |                |        |        |        |        |
| EP2                            |                             |                |                |                |        |        |        |        |
| optimized Cartesian coordinate | C                           | -0.40081800000 | -1.36624900000 | -0.16349000000 |        |        |        |        |
|                                | C                           | 0.58843100000  | -0.26011400000 | 0.22078000000  |        |        |        |        |
|                                | C                           | 1.97303300000  | -0.55844100000 | -0.25143600000 |        |        |        |        |
|                                | C                           | 3.13073000000  | 0.26696600000  | 0.19678900000  |        |        |        |        |
|                                | H                           | 4.07526600000  | -0.27127500000 | 0.09286100000  |        |        |        |        |
|                                | C                           | 0.08683000000  | 1.10216100000  | -0.30821800000 |        |        |        |        |
|                                | C                           | -1.33019400000 | 1.41027900000  | 0.18024700000  |        |        |        |        |
|                                | C                           | -2.30213800000 | 0.29414100000  | -0.20744900000 |        |        |        |        |
|                                | C                           | -1.81944500000 | -1.05883500000 | 0.31942700000  |        |        |        |        |
|                                | H                           | 0.77669000000  | 1.89403500000  | -0.00167800000 |        |        |        |        |
|                                | H                           | 0.60688000000  | -0.18379800000 | 1.32048500000  |        |        |        |        |
|                                | H                           | -0.40315900000 | -1.46428100000 | -1.25725300000 |        |        |        |        |
|                                | H                           | -0.05538000000 | -2.32250800000 | 0.24020000000  |        |        |        |        |
|                                | H                           | -1.31864600000 | 1.51401300000  | 1.27222600000  |        |        |        |        |
|                                | H                           | -1.66800400000 | 2.36800800000  | -0.22517800000 |        |        |        |        |
|                                | H                           | -3.30428700000 | 0.51409600000  | 0.17037900000  |        |        |        |        |
|                                | H                           | -2.37687600000 | 0.24772500000  | -1.30085600000 |        |        |        |        |
|                                | H                           | -1.82995600000 | -1.04169300000 | 1.41615400000  |        |        |        |        |
|                                | H                           | -2.50333100000 | -1.85365900000 | 0.00962700000  |        |        |        |        |
|                                | H                           | 0.10027600000  | 1.07251800000  | -1.40548800000 |        |        |        |        |
|                                | H                           | 3.22802100000  | 1.19499900000  | -0.38568200000 |        |        |        |        |
|                                | H                           | 3.01866500000  | 0.56360700000  | 1.24453000000  |        |        |        |        |
|                                | H                           | 2.09526600000  | -1.21123900000 | -1.11023000000 |        |        |        |        |
| frequencies                    | 55.5                        | 115.0          | 138.9          | 209.0          | 237.5  | 304.3  | 364.4  | 387.6  |
|                                | 434.4                       | 459.1          | 478.9          | 544.7          | 793.1  | 800.3  | 857.4  | 891.4  |
|                                | 901.5                       | 932.4          | 937.3          | 986.4          | 1012.5 | 1050.3 | 1065.3 | 1087.6 |
|                                | 1104.2                      | 1118.8         | 1162.3         | 1171.0         | 1214.5 | 1253.1 | 1287.1 | 1294.3 |
|                                | 1308.3                      | 1325.2         | 1352.3         | 1368.8         | 1379.1 | 1384.7 | 1386.6 | 1406.3 |
|                                | 1430.1                      | 1478.0         | 1483.4         | 1486.6         | 1489.6 | 1493.9 | 1494.7 | 1508.5 |
|                                | 2979.9                      | 2998.4         | 3030.6         | 3035.6         | 3037.5 | 3041.9 | 3045.8 | 3071.9 |
|                                | 3090.5                      | 3092.4         | 3094.3         | 3095.7         | 3100.1 | 3122.2 | 3179.5 |        |
| electronic state               | 2-A                         |                |                |                |        |        |        |        |
| point group                    | C1                          |                |                |                |        |        |        |        |



|                                |                             |                 |                 |                 |        |        |        |        |
|--------------------------------|-----------------------------|-----------------|-----------------|-----------------|--------|--------|--------|--------|
| rotational constants           | 3.93364                     | 1.30514         | 1.05880         |                 |        |        |        |        |
| ZPE                            | 0.212878 (Hartree/Particle) |                 |                 |                 |        |        |        |        |
| EP3                            |                             |                 |                 |                 |        |        |        |        |
| optimized Cartesian coordinate | C                           | -0.103490000000 | 1.273825000000  | 0.079733000000  |        |        |        |        |
|                                | C                           | 0.551130000000  | 0.000083000000  | -0.361243000000 |        |        |        |        |
|                                | C                           | 2.012392000000  | 0.000235000000  | -0.677810000000 |        |        |        |        |
|                                | C                           | 2.887920000000  | -0.000155000000 | 0.590745000000  |        |        |        |        |
|                                | H                           | 2.685401000000  | -0.884221000000 | 1.200010000000  |        |        |        |        |
|                                | H                           | 2.260829000000  | -0.880436000000 | -1.279713000000 |        |        |        |        |
|                                | H                           | 2.685279000000  | 0.883449000000  | 1.200630000000  |        |        |        |        |
|                                | C                           | -0.103350000000 | -1.273766000000 | 0.079612000000  |        |        |        |        |
|                                | C                           | -1.616909000000 | -1.260094000000 | -0.175227000000 |        |        |        |        |
|                                | C                           | -2.257591000000 | -0.000106000000 | 0.409070000000  |        |        |        |        |
|                                | C                           | -1.617050000000 | 1.260016000000  | -0.175090000000 |        |        |        |        |
|                                | H                           | 0.363400000000  | -2.131507000000 | -0.415143000000 |        |        |        |        |
|                                | H                           | 0.059409000000  | 1.417000000000  | 1.163342000000  |        |        |        |        |
|                                | H                           | 0.363158000000  | 2.131659000000  | -0.414952000000 |        |        |        |        |
|                                | H                           | -1.796030000000 | -1.284663000000 | -1.255949000000 |        |        |        |        |
|                                | H                           | -2.076861000000 | -2.156156000000 | 0.250021000000  |        |        |        |        |
|                                | H                           | -3.334285000000 | -0.000157000000 | 0.219230000000  |        |        |        |        |
|                                | H                           | -2.125793000000 | -0.000159000000 | 1.498610000000  |        |        |        |        |
|                                | H                           | -1.796184000000 | 1.284685000000  | -1.255808000000 |        |        |        |        |
|                                | H                           | -2.077099000000 | 2.155981000000  | 0.250260000000  |        |        |        |        |
|                                | H                           | 0.059554000000  | -1.417018000000 | 1.163209000000  |        |        |        |        |
|                                | H                           | 3.950154000000  | 0.000008000000  | 0.336659000000  |        |        |        |        |
|                                | H                           | 2.260759000000  | 0.881309000000  | -1.279142000000 |        |        |        |        |
| frequencies                    | 47.7                        | 75.3            | 204.0           | 211.3           | 229.1  | 318.8  | 363.3  | 379.9  |
|                                | 444.2                       | 468.6           | 584.3           | 739.6           | 784.6  | 792.8  | 855.9  | 856.7  |
|                                | 914.3                       | 928.4           | 942.1           | 997.2           | 1046.4 | 1050.7 | 1051.2 | 1096.8 |
|                                | 1101.1                      | 1105.9          | 1173.3          | 1196.1          | 1249.9 | 1263.4 | 1287.0 | 1311.9 |
|                                | 1328.3                      | 1337.3          | 1359.7          | 1375.9          | 1376.0 | 1387.0 | 1398.0 | 1409.6 |
|                                | 1468.6                      | 1475.9          | 1486.2          | 1487.4          | 1491.5 | 1502.5 | 1503.9 | 1509.1 |
|                                | 2945.4                      | 2948.6          | 3035.6          | 3042.6          | 3048.3 | 3049.9 | 3057.5 | 3074.5 |
|                                | 3077.1                      | 3083.9          | 3095.3          | 3097.6          | 3101.3 | 3132.4 | 3133.3 |        |
| electronic state               | 2-A                         |                 |                 |                 |        |        |        |        |
| point group                    | C1                          |                 |                 |                 |        |        |        |        |
| rotational constants           | 3.73696                     | 1.33903         | 1.11229         |                 |        |        |        |        |
| ZPE                            | 0.213901 (Hartree/Particle) |                 |                 |                 |        |        |        |        |
| EP4                            |                             |                 |                 |                 |        |        |        |        |
| optimized Cartesian coordinate | C                           | 0.437341000000  | 1.339036000000  | -0.064852000000 |        |        |        |        |
|                                | C                           | 1.885278000000  | 1.094439000000  | 0.204638000000  |        |        |        |        |
|                                | C                           | 2.317603000000  | -0.289438000000 | -0.301813000000 |        |        |        |        |
|                                | C                           | -0.075469000000 | -1.093838000000 | -0.212007000000 |        |        |        |        |
|                                | C                           | -0.564593000000 | 0.281260000000  | 0.276361000000  |        |        |        |        |
|                                | H                           | 3.344633000000  | -0.499502000000 | 0.008472000000  |        |        |        |        |
|                                | H                           | -0.142063000000 | -1.115745000000 | -1.307816000000 |        |        |        |        |
|                                | H                           | -0.732297000000 | -1.880593000000 | 0.168228000000  |        |        |        |        |
|                                | H                           | 2.071103000000  | 1.132348000000  | 1.291883000000  |        |        |        |        |
|                                | H                           | 2.500529000000  | 1.880261000000  | -0.239828000000 |        |        |        |        |
|                                | H                           | 0.087567000000  | 2.348220000000  | -0.255346000000 |        |        |        |        |
|                                | H                           | -0.640563000000 | 0.217067000000  | 1.378860000000  |        |        |        |        |
|                                | H                           | 2.301476000000  | -0.289984000000 | -1.397353000000 |        |        |        |        |
|                                | C                           | -1.953101000000 | 0.638159000000  | -0.265336000000 |        |        |        |        |
|                                | H                           | -1.887600000000 | 0.722590000000  | -1.356320000000 |        |        |        |        |
|                                | C                           | -3.046541000000 | -0.357822000000 | 0.114749000000  |        |        |        |        |
|                                | H                           | -3.073292000000 | -0.512194000000 | 1.197352000000  |        |        |        |        |
|                                | H                           | -4.028959000000 | 0.003106000000  | -0.195598000000 |        |        |        |        |
|                                | H                           | -2.889446000000 | -1.329429000000 | -0.357685000000 |        |        |        |        |
|                                | C                           | 1.367799000000  | -1.370413000000 | 0.214110000000  |        |        |        |        |
|                                | H                           | 1.681438000000  | -2.353769000000 | -0.146437000000 |        |        |        |        |
|                                | H                           | 1.419740000000  | -1.403035000000 | 1.309793000000  |        |        |        |        |
|                                | H                           | -2.222164000000 | 1.632361000000  | 0.106704000000  |        |        |        |        |

|                                |                             |                 |         |                 |        |                 |        |        |
|--------------------------------|-----------------------------|-----------------|---------|-----------------|--------|-----------------|--------|--------|
| frequencies                    | 80.6                        | 120.1           | 183.3   | 213.4           | 247.7  | 321.6           | 340.8  | 367.6  |
|                                | 431.0                       | 461.0           | 495.0   | 601.1           | 763.0  | 799.7           | 837.5  | 868.4  |
|                                | 901.0                       | 932.0           | 938.3   | 998.4           | 1020.8 | 1054.0          | 1076.4 | 1093.5 |
|                                | 1100.4                      | 1121.6          | 1155.1  | 1176.7          | 1220.5 | 1255.1          | 1265.0 | 1294.5 |
|                                | 1315.6                      | 1334.2          | 1349.1  | 1359.9          | 1370.6 | 1379.6          | 1387.3 | 1415.0 |
|                                | 1418.6                      | 1472.3          | 1485.3  | 1489.9          | 1491.8 | 1500.4          | 1504.9 | 1514.3 |
|                                | 2924.1                      | 2961.0          | 3031.2  | 3038.7          | 3044.3 | 3051.9          | 3058.2 | 3081.8 |
|                                | 3095.2                      | 3098.1          | 3099.7  | 3102.6          | 3127.5 | 3138.3          | 3184.4 |        |
| electronic state               | 2-A                         |                 |         |                 |        |                 |        |        |
| point group                    | C1                          |                 |         |                 |        |                 |        |        |
| rotational constants           | 3.98231                     | 1.30879         | 1.05640 |                 |        |                 |        |        |
| ZPE                            | 0.213148 (Hartree/Particle) |                 |         |                 |        |                 |        |        |
| EP5                            |                             |                 |         |                 |        |                 |        |        |
| optimized Cartesian coordinate | C                           | -1.334130000000 |         | 1.422789000000  |        | -0.134260000000 |        |        |
|                                | C                           | 0.089900000000  |         | 1.140629000000  |        | 0.215923000000  |        |        |
|                                | C                           | 0.536258000000  |         | -0.258228000000 |        | -0.249355000000 |        |        |
|                                | C                           | -1.894369000000 |         | -1.000061000000 |        | -0.321539000000 |        |        |
|                                | C                           | -2.360675000000 |         | 0.380949000000  |        | 0.162415000000  |        |        |
|                                | H                           | -1.886424000000 |         | -1.010957000000 |        | -1.416996000000 |        |        |
|                                | H                           | -2.597880000000 |         | -1.770537000000 |        | 0.005199000000  |        |        |
|                                | H                           | 0.223157000000  |         | 1.180618000000  |        | 1.313336000000  |        |        |
|                                | H                           | 0.742271000000  |         | 1.911225000000  |        | -0.201072000000 |        |        |
|                                | H                           | -1.641132000000 |         | 2.436705000000  |        | -0.358836000000 |        |        |
|                                | H                           | -2.525970000000 |         | 0.321789000000  |        | 1.252112000000  |        |        |
|                                | H                           | -3.323473000000 |         | 0.643359000000  |        | -0.282109000000 |        |        |
|                                | H                           | 0.557170000000  |         | -0.250760000000 |        | -1.348442000000 |        |        |
|                                | C                           | 1.935878000000  |         | -0.616163000000 |        | 0.255621000000  |        |        |
|                                | H                           | 2.179997000000  |         | -1.626240000000 |        | -0.090465000000 |        |        |
|                                | C                           | 3.030291000000  |         | 0.350133000000  |        | -0.195000000000 |        |        |
|                                | H                           | 2.904590000000  |         | 1.338560000000  |        | 0.251414000000  |        |        |
|                                | H                           | 4.018335000000  |         | -0.015597000000 |        | 0.091083000000  |        |        |
|                                | H                           | 3.019224000000  |         | 0.469903000000  |        | -1.282133000000 |        |        |
|                                | C                           | -0.488323000000 |         | -1.307833000000 |        | 0.194360000000  |        |        |
|                                | H                           | -0.504219000000 |         | -1.340906000000 |        | 1.292674000000  |        |        |
|                                | H                           | -0.168320000000 |         | -2.297716000000 |        | -0.146141000000 |        |        |
|                                | H                           | 1.913686000000  |         | -0.662742000000 |        | 1.351391000000  |        |        |
| frequencies                    | 90.4                        | 130.5           | 166.9   | 214.8           | 248.1  | 288.6           | 360.9  | 374.2  |
|                                | 428.8                       | 461.1           | 467.6   | 613.0           | 764.7  | 797.2           | 852.7  | 862.1  |
|                                | 895.1                       | 925.5           | 937.8   | 981.7           | 1030.1 | 1056.9          | 1072.5 | 1103.3 |
|                                | 1121.0                      | 1126.8          | 1132.8  | 1162.1          | 1228.2 | 1253.2          | 1276.6 | 1305.3 |
|                                | 1317.8                      | 1326.4          | 1358.8  | 1363.6          | 1375.5 | 1379.7          | 1402.8 | 1406.3 |
|                                | 1416.0                      | 1468.8          | 1473.4  | 1485.4          | 1493.0 | 1498.8          | 1504.6 | 1514.7 |
|                                | 2939.2                      | 2960.8          | 3016.2  | 3026.7          | 3040.3 | 3051.8          | 3058.9 | 3076.6 |
|                                | 3085.8                      | 3099.6          | 3101.0  | 3102.3          | 3128.2 | 3138.0          | 3205.4 |        |
| electronic state               | 2-A                         |                 |         |                 |        |                 |        |        |
| point group                    | C1                          |                 |         |                 |        |                 |        |        |
| rotational constants           | 3.99311                     | 1.31400         | 1.06124 |                 |        |                 |        |        |
| ZPE                            | 0.213116 (Hartree/Particle) |                 |         |                 |        |                 |        |        |
| EP6                            |                             |                 |         |                 |        |                 |        |        |
| optimized Cartesian coordinate | C                           | 2.329726000000  |         | 0.328731000000  |        | -0.130533000000 |        |        |
|                                | C                           | 1.910467000000  |         | -1.048003000000 |        | 0.265162000000  |        |        |
|                                | C                           | 0.480068000000  |         | -1.350189000000 |        | -0.204165000000 |        |        |
|                                | C                           | -0.507939000000 |         | -0.256257000000 |        | 0.214479000000  |        |        |
|                                | C                           | -1.926859000000 |         | -0.615340000000 |        | -0.236475000000 |        |        |
|                                | C                           | -3.003802000000 |         | 0.363648000000  |        | 0.228940000000  |        |        |
|                                | H                           | -4.001101000000 |         | -0.007689000000 |        | -0.014874000000 |        |        |
|                                | C                           | -0.047245000000 |         | 1.099538000000  |        | -0.331735000000 |        |        |
|                                | C                           | 1.377121000000  |         | 1.447962000000  |        | 0.129105000000  |        |        |
|                                | H                           | 0.153049000000  |         | -2.317432000000 |        | 0.190236000000  |        |        |
|                                | H                           | -0.504104000000 |         | -0.197167000000 |        | 1.313982000000  |        |        |
|                                | H                           | -0.073801000000 |         | 1.060077000000  |        | -1.428353000000 |        |        |
|                                | H                           | -0.731559000000 |         | 1.892437000000  |        | -0.019292000000 |        |        |

|                                |                             |         |                 |        |                 |        |                 |        |  |
|--------------------------------|-----------------------------|---------|-----------------|--------|-----------------|--------|-----------------|--------|--|
|                                | H                           |         | 1.935766000000  |        | -1.140661000000 |        | 1.364785000000  |        |  |
|                                | H                           |         | 2.607310000000  |        | -1.795447000000 |        | -0.121494000000 |        |  |
|                                | H                           |         | 3.371650000000  |        | 0.540645000000  |        | -0.336367000000 |        |  |
|                                | H                           |         | 1.340531000000  |        | 1.656773000000  |        | 1.212469000000  |        |  |
|                                | H                           |         | 1.717719000000  |        | 2.369808000000  |        | -0.348332000000 |        |  |
|                                | H                           |         | 0.470674000000  |        | -1.428045000000 |        | -1.298516000000 |        |  |
|                                | H                           |         | -2.164767000000 |        | -1.616444000000 |        | 0.138879000000  |        |  |
|                                | H                           |         | -2.956174000000 |        | 0.507099000000  |        | 1.312215000000  |        |  |
|                                | H                           |         | -2.894474000000 |        | 1.341782000000  |        | -0.243033000000 |        |  |
|                                | H                           |         | -1.939944000000 |        | -0.686270000000 |        | -1.330966000000 |        |  |
| frequencies                    | 79.8                        | 118.9   | 197.4           | 211.4  | 237.3           | 266.6  | 352.8           | 372.6  |  |
|                                | 443.5                       | 449.5   | 471.2           | 630.0  | 762.5           | 783.0  | 822.7           | 881.7  |  |
|                                | 914.0                       | 933.3   | 946.7           | 994.0  | 1021.5          | 1046.4 | 1064.2          | 1097.8 |  |
|                                | 1106.6                      | 1126.4  | 1148.6          | 1170.2 | 1231.3          | 1243.2 | 1293.1          | 1293.7 |  |
|                                | 1309.3                      | 1335.7  | 1345.2          | 1366.1 | 1377.6          | 1391.9 | 1401.3          | 1408.3 |  |
|                                | 1416.9                      | 1469.3  | 1477.5          | 1481.8 | 1490.6          | 1498.0 | 1504.6          | 1515.2 |  |
|                                | 2957.7                      | 2960.4  | 2999.5          | 3035.9 | 3037.2          | 3043.8 | 3059.5          | 3076.6 |  |
|                                | 3088.8                      | 3096.6  | 3097.2          | 3103.2 | 3128.2          | 3139.8 | 3203.3          |        |  |
| electronic state               | 2-A                         |         |                 |        |                 |        |                 |        |  |
| point group                    | C1                          |         |                 |        |                 |        |                 |        |  |
| rotational constants           | 3.84905                     | 1.33778 | 1.06676         |        |                 |        |                 |        |  |
| ZPE                            | 0.213072 (Hartree/Particle) |         |                 |        |                 |        |                 |        |  |
|                                |                             |         |                 |        |                 |        |                 |        |  |
| $TS_b\beta$                    |                             |         |                 |        |                 |        |                 |        |  |
| optimized Cartesian coordinate | C                           |         | 0.257725000000  |        | -0.752548000000 |        | -0.246145000000 |        |  |
|                                | C                           |         | 0.398100000000  |        | 0.774533000000  |        | -0.250213000000 |        |  |
|                                | C                           |         | -0.881444000000 |        | 1.479527000000  |        | 0.205052000000  |        |  |
|                                | C                           |         | -2.038299000000 |        | 1.363619000000  |        | -0.751950000000 |        |  |
|                                | H                           |         | -2.616694000000 |        | 0.168495000000  |        | -0.570784000000 |        |  |
|                                | O                           |         | -3.108413000000 |        | -0.863597000000 |        | -0.295292000000 |        |  |
|                                | O                           |         | -2.792556000000 |        | -1.048817000000 |        | 1.042784000000  |        |  |
|                                | H                           |         | -2.006805000000 |        | -1.611009000000 |        | 1.007654000000  |        |  |
|                                | C                           |         | 1.594294000000  |        | 1.184834000000  |        | 0.615439000000  |        |  |
|                                | C                           |         | 2.886586000000  |        | 0.500601000000  |        | 0.163880000000  |        |  |
|                                | C                           |         | 2.733347000000  |        | -1.021610000000 |        | 0.148010000000  |        |  |
|                                | C                           |         | 1.541360000000  |        | -1.442085000000 |        | -0.713785000000 |        |  |
|                                | H                           |         | 1.713874000000  |        | 2.272502000000  |        | 0.590694000000  |        |  |
|                                | H                           |         | 0.608181000000  |        | 1.089232000000  |        | -1.283186000000 |        |  |
|                                | H                           |         | 0.049648000000  |        | -1.066029000000 |        | 0.788045000000  |        |  |
|                                | H                           |         | -0.590008000000 |        | -1.061494000000 |        | -0.866253000000 |        |  |
|                                | H                           |         | 3.139532000000  |        | 0.846045000000  |        | -0.845892000000 |        |  |
|                                | H                           |         | 3.714970000000  |        | 0.793019000000  |        | 0.814465000000  |        |  |
|                                | H                           |         | 3.650775000000  |        | -1.492234000000 |        | -0.214989000000 |        |  |
|                                | H                           |         | 2.577490000000  |        | -1.378017000000 |        | 1.173714000000  |        |  |
|                                | H                           |         | 1.734247000000  |        | -1.168377000000 |        | -1.757996000000 |        |  |
|                                | H                           |         | 1.417066000000  |        | -2.527938000000 |        | -0.689904000000 |        |  |
|                                | H                           |         | 1.382434000000  |        | 0.913410000000  |        | 1.658549000000  |        |  |
|                                | H                           |         | -1.180197000000 |        | 1.107078000000  |        | 1.194533000000  |        |  |
|                                | H                           |         | -2.891746000000 |        | 2.004869000000  |        | -0.536924000000 |        |  |
|                                | H                           |         | -1.780765000000 |        | 1.340266000000  |        | -1.811668000000 |        |  |
|                                | H                           |         | -0.664270000000 |        | 2.548266000000  |        | 0.348277000000  |        |  |
| frequencies                    | -1842.8                     | 44.0    | 82.9            | 98.1   | 112.4           | 143.1  | 223.9           | 241.3  |  |
|                                | 266.7                       | 331.7   | 361.5           | 394.2  | 434.4           | 449.8  | 471.8           | 518.8  |  |
|                                | 550.0                       | 559.4   | 776.2           | 806.4  | 822.8           | 860.2  | 903.0           | 910.7  |  |
|                                | 938.3                       | 944.5   | 1005.9          | 1030.2 | 1058.4          | 1067.0 | 1073.9          | 1077.1 |  |
|                                | 1104.9                      | 1125.7  | 1136.0          | 1169.0 | 1186.0          | 1222.2 | 1245.3          | 1286.3 |  |
|                                | 1291.2                      | 1299.7  | 1317.6          | 1337.7 | 1366.2          | 1377.3 | 1381.7          | 1386.4 |  |
|                                | 1390.2                      | 1409.7  | 1417.4          | 1453.3 | 1462.2          | 1475.2 | 1486.9          | 1489.6 |  |
|                                | 1492.7                      | 1501.2  | 1516.9          | 3000.1 | 3006.8          | 3011.7 | 3030.3          | 3038.6 |  |
|                                | 3044.2                      | 3046.5  | 3048.5          | 3086.1 | 3088.7          | 3097.9 | 3098.3          | 3099.1 |  |
|                                | 3102.5                      | 3184.9  | 3809.2          |        |                 |        |                 |        |  |
| electronic state               | 2-A                         |         |                 |        |                 |        |                 |        |  |
| point group                    | C1                          |         |                 |        |                 |        |                 |        |  |
| rotational constants           | 2.05324                     | 0.69559 | 0.58972         |        |                 |        |                 |        |  |
| ZPE                            | 0.238479 (Hartree/Particle) |         |                 |        |                 |        |                 |        |  |

|                                |                             |                 |                 |                 |        |        |        |        |  |
|--------------------------------|-----------------------------|-----------------|-----------------|-----------------|--------|--------|--------|--------|--|
| TS <sub>b</sub> α              |                             |                 |                 |                 |        |        |        |        |  |
| optimized Cartesian coordinate | C                           | -1.179994000000 | 1.358763000000  | -0.047608000000 |        |        |        |        |  |
|                                | C                           | -0.051662000000 | 0.310589000000  | 0.027516000000  |        |        |        |        |  |
|                                | C                           | 1.191040000000  | 0.879267000000  | 0.669743000000  |        |        |        |        |  |
|                                | C                           | 1.903024000000  | 1.994475000000  | -0.053337000000 |        |        |        |        |  |
|                                | H                           | 2.047831000000  | -0.108468000000 | 0.612973000000  |        |        |        |        |  |
|                                | O                           | 2.796776000000  | -1.018412000000 | 0.330999000000  |        |        |        |        |  |
|                                | O                           | 2.518819000000  | -1.275394000000 | -1.003231000000 |        |        |        |        |  |
|                                | H                           | 1.901446000000  | -2.018490000000 | -0.966748000000 |        |        |        |        |  |
|                                | H                           | 2.872950000000  | 2.203801000000  | 0.400410000000  |        |        |        |        |  |
|                                | C                           | -0.548939000000 | -0.940343000000 | 0.762466000000  |        |        |        |        |  |
|                                | C                           | -1.803393000000 | -1.522480000000 | 0.109618000000  |        |        |        |        |  |
|                                | C                           | -2.917388000000 | -0.476670000000 | 0.035276000000  |        |        |        |        |  |
|                                | C                           | -2.438951000000 | 0.778592000000  | -0.696284000000 |        |        |        |        |  |
|                                | H                           | 0.249710000000  | -1.688163000000 | 0.808409000000  |        |        |        |        |  |
|                                | H                           | 0.202952000000  | 0.030880000000  | -1.005700000000 |        |        |        |        |  |
|                                | H                           | -1.412863000000 | 1.696265000000  | 0.970910000000  |        |        |        |        |  |
|                                | H                           | -0.840171000000 | 2.234228000000  | -0.606852000000 |        |        |        |        |  |
|                                | H                           | -1.559509000000 | -1.859549000000 | -0.905717000000 |        |        |        |        |  |
|                                | H                           | -2.142581000000 | -2.402415000000 | 0.662432000000  |        |        |        |        |  |
|                                | H                           | -3.798405000000 | -0.892484000000 | -0.460544000000 |        |        |        |        |  |
|                                | H                           | -3.222723000000 | -0.205684000000 | 1.053302000000  |        |        |        |        |  |
|                                | H                           | -2.217726000000 | 0.524887000000  | -1.740025000000 |        |        |        |        |  |
|                                | H                           | -3.229678000000 | 1.533459000000  | -0.714820000000 |        |        |        |        |  |
|                                | H                           | -0.774627000000 | -0.667750000000 | 1.801973000000  |        |        |        |        |  |
|                                | H                           | 2.064698000000  | 1.728143000000  | -1.101187000000 |        |        |        |        |  |
|                                | H                           | 1.317941000000  | 2.920884000000  | -0.024972000000 |        |        |        |        |  |
|                                | H                           | 1.093571000000  | 1.027739000000  | 1.749674000000  |        |        |        |        |  |
| frequencies                    | -1770.1                     | 42.7            | 59.3            | 83.0            | 121.7  | 137.0  | 185.4  | 215.6  |  |
|                                | 238.5                       | 296.2           | 359.3           | 375.8           | 406.9  | 415.9  | 441.4  | 473.5  |  |
|                                | 530.1                       | 604.9           | 795.3           | 799.6           | 850.1  | 860.9  | 891.5  | 904.1  |  |
|                                | 937.5                       | 941.2           | 1002.7          | 1054.5          | 1058.9 | 1073.5 | 1077.6 | 1085.4 |  |
|                                | 1112.3                      | 1122.1          | 1139.4          | 1165.6          | 1185.9 | 1219.1 | 1264.7 | 1291.5 |  |
|                                | 1295.4                      | 1309.0          | 1334.2          | 1363.7          | 1371.4 | 1376.7 | 1386.3 | 1388.1 |  |
|                                | 1403.8                      | 1411.2          | 1417.4          | 1468.2          | 1483.5 | 1487.3 | 1489.5 | 1490.5 |  |
|                                | 1493.4                      | 1496.5          | 1510.0          | 3011.8          | 3030.2 | 3035.5 | 3037.9 | 3040.6 |  |
|                                | 3042.2                      | 3047.6          | 3082.7          | 3087.7          | 3096.8 | 3098.1 | 3100.7 | 3103.8 |  |
|                                | 3110.4                      | 3142.5          | 3803.8          |                 |        |        |        |        |  |
| electronic state               | 2-A                         |                 |                 |                 |        |        |        |        |  |
| point group                    | C1                          |                 |                 |                 |        |        |        |        |  |
| rotational constants           | 1.86449                     | 0.77883         | 0.62313         |                 |        |        |        |        |  |
| ZPE                            | 0.238454 (Hartree/Particle) |                 |                 |                 |        |        |        |        |  |
| TS <sub>b</sub> α'             |                             |                 |                 |                 |        |        |        |        |  |
| optimized Cartesian coordinate | C                           | -0.579994000000 | 0.320382000000  | 1.324643000000  |        |        |        |        |  |
|                                | C                           | 0.287206000000  | -0.428737000000 | 0.331531000000  |        |        |        |        |  |
|                                | C                           | 1.629925000000  | -0.853244000000 | 0.891475000000  |        |        |        |        |  |
|                                | C                           | 2.574439000000  | -1.489395000000 | -0.126602000000 |        |        |        |        |  |
|                                | H                           | 0.615773000000  | 0.483281000000  | -0.521270000000 |        |        |        |        |  |
|                                | O                           | 0.983836000000  | 1.464165000000  | -1.177159000000 |        |        |        |        |  |
|                                | O                           | 1.416206000000  | 2.354713000000  | -0.206227000000 |        |        |        |        |  |
|                                | H                           | 0.655747000000  | 2.937334000000  | -0.077817000000 |        |        |        |        |  |
|                                | H                           | 2.695585000000  | -0.834340000000 | -0.993019000000 |        |        |        |        |  |
|                                | H                           | 2.105408000000  | 0.030405000000  | 1.330303000000  |        |        |        |        |  |
|                                | H                           | 2.204679000000  | -2.455626000000 | -0.475119000000 |        |        |        |        |  |
|                                | C                           | -0.471959000000 | -1.452424000000 | -0.491740000000 |        |        |        |        |  |
|                                | C                           | -1.750947000000 | -0.872465000000 | -1.103940000000 |        |        |        |        |  |
|                                | C                           | -2.628975000000 | -0.206719000000 | -0.043587000000 |        |        |        |        |  |
|                                | C                           | -1.851693000000 | 0.887335000000  | 0.689317000000  |        |        |        |        |  |
|                                | H                           | 0.168105000000  | -1.860556000000 | -1.277457000000 |        |        |        |        |  |
|                                | H                           | -0.859420000000 | -0.381129000000 | 2.126587000000  |        |        |        |        |  |
|                                | H                           | 0.009196000000  | 1.111285000000  | 1.800000000000  |        |        |        |        |  |
|                                | H                           | -1.474562000000 | -0.126988000000 | -1.858433000000 |        |        |        |        |  |
|                                | H                           | -2.304528000000 | -1.660514000000 | -1.620497000000 |        |        |        |        |  |
|                                | H                           | -3.528347000000 | 0.209870000000  | -0.504259000000 |        |        |        |        |  |

|                                |                             |                 |                 |                 |        |        |        |        |
|--------------------------------|-----------------------------|-----------------|-----------------|-----------------|--------|--------|--------|--------|
|                                | H                           | -2.960688000000 | -0.960890000000 | 0.680910000000  |        |        |        |        |
|                                | H                           | -1.578295000000 | 1.667376000000  | -0.032143000000 |        |        |        |        |
|                                | H                           | -2.474806000000 | 1.358236000000  | 1.453818000000  |        |        |        |        |
|                                | H                           | -0.730894000000 | -2.293554000000 | 0.172063000000  |        |        |        |        |
|                                | H                           | 3.559373000000  | -1.652760000000 | 0.313779000000  |        |        |        |        |
|                                | H                           | 1.449337000000  | -1.550858000000 | 1.723062000000  |        |        |        |        |
| frequencies                    | -1676.7                     | 32.0            | 74.3            | 84.0            | 96.1   | 136.2  | 185.4  | 221.3  |
|                                | 246.5                       | 271.2           | 332.0           | 374.8           | 382.3  | 402.7  | 451.9  | 460.7  |
|                                | 540.0                       | 568.8           | 756.1           | 789.4           | 806.2  | 859.1  | 889.2  | 917.1  |
|                                | 936.0                       | 950.1           | 1002.5          | 1044.2          | 1057.2 | 1067.6 | 1076.8 | 1095.1 |
|                                | 1117.4                      | 1126.6          | 1173.5          | 1176.2          | 1185.4 | 1247.5 | 1260.1 | 1292.2 |
|                                | 1300.8                      | 1325.0          | 1351.4          | 1366.1          | 1379.6 | 1386.6 | 1389.1 | 1401.6 |
|                                | 1408.4                      | 1416.0          | 1460.1          | 1465.9          | 1472.6 | 1479.7 | 1487.7 | 1493.3 |
|                                | 1505.4                      | 1508.4          | 1513.6          | 2988.4          | 2997.3 | 3008.5 | 3035.8 | 3043.3 |
|                                | 3052.1                      | 3063.2          | 3074.1          | 3081.2          | 3099.7 | 3100.6 | 3104.1 | 3105.0 |
|                                | 3137.1                      | 3140.1          | 3807.1          |                 |        |        |        |        |
| electronic state               | 2-A                         |                 |                 |                 |        |        |        |        |
| point group                    | C1                          |                 |                 |                 |        |        |        |        |
| rotational constants           | 1.45402                     | 1.00574         | 0.78416         |                 |        |        |        |        |
| ZPE                            | 0.238375 (Hartree/Particle) |                 |                 |                 |        |        |        |        |
| TS <sub>b</sub> β'             |                             |                 |                 |                 |        |        |        |        |
| optimized Cartesian coordinate | C                           | -0.124152000000 | 0.233719000000  | 0.874805000000  |        |        |        |        |
|                                | C                           | 1.190604000000  | -0.332013000000 | 1.361104000000  |        |        |        |        |
|                                | C                           | 1.945322000000  | -1.067403000000 | 0.251718000000  |        |        |        |        |
|                                | H                           | 0.223747000000  | 1.133713000000  | -0.010058000000 |        |        |        |        |
|                                | O                           | 0.667141000000  | 1.916063000000  | -0.828249000000 |        |        |        |        |
|                                | O                           | 1.923100000000  | 2.245210000000  | -0.335960000000 |        |        |        |        |
|                                | H                           | 1.773972000000  | 3.084898000000  | 0.117222000000  |        |        |        |        |
|                                | C                           | -0.210435000000 | -1.445672000000 | -0.987718000000 |        |        |        |        |
|                                | C                           | -1.016408000000 | -0.708334000000 | 0.089526000000  |        |        |        |        |
|                                | H                           | 2.840717000000  | -1.540010000000 | 0.663127000000  |        |        |        |        |
|                                | H                           | 0.081101000000  | -0.721738000000 | -1.758421000000 |        |        |        |        |
|                                | H                           | -0.852163000000 | -2.189069000000 | -1.470001000000 |        |        |        |        |
|                                | H                           | 0.976505000000  | -1.032688000000 | 2.183238000000  |        |        |        |        |
|                                | H                           | 1.809416000000  | 0.464543000000  | 1.782978000000  |        |        |        |        |
|                                | H                           | -0.648218000000 | 0.834373000000  | 1.620715000000  |        |        |        |        |
|                                | H                           | -1.388768000000 | -1.460752000000 | 0.807402000000  |        |        |        |        |
|                                | H                           | 2.277313000000  | -0.336026000000 | -0.492650000000 |        |        |        |        |
|                                | C                           | -2.229712000000 | 0.000225000000  | -0.523231000000 |        |        |        |        |
|                                | H                           | -2.797341000000 | -0.738174000000 | -1.098739000000 |        |        |        |        |
|                                | C                           | -3.153356000000 | 0.665898000000  | 0.495247000000  |        |        |        |        |
|                                | H                           | -2.672984000000 | 1.515362000000  | 0.984822000000  |        |        |        |        |
|                                | H                           | -4.058606000000 | 1.039414000000  | 0.013037000000  |        |        |        |        |
|                                | H                           | -3.456081000000 | -0.043484000000 | 1.270896000000  |        |        |        |        |
|                                | C                           | 1.046615000000  | -2.105848000000 | -0.420290000000 |        |        |        |        |
|                                | H                           | 1.591721000000  | -2.618997000000 | -1.216628000000 |        |        |        |        |
|                                | H                           | 0.758822000000  | -2.870343000000 | 0.312570000000  |        |        |        |        |
|                                | H                           | -1.871960000000 | 0.745367000000  | -1.243172000000 |        |        |        |        |
| frequencies                    | -1755.2                     | 51.1            | 57.5            | 90.0            | 96.9   | 129.6  | 187.1  | 227.3  |
|                                | 243.4                       | 270.1           | 343.0           | 366.2           | 397.5  | 436.4  | 454.7  | 478.7  |
|                                | 551.5                       | 595.0           | 763.1           | 793.1           | 805.9  | 865.7  | 892.3  | 902.6  |
|                                | 934.6                       | 937.7           | 1001.3          | 1037.5          | 1060.6 | 1063.0 | 1070.4 | 1101.4 |
|                                | 1111.2                      | 1121.7          | 1157.9          | 1171.8          | 1196.3 | 1231.8 | 1257.2 | 1289.5 |
|                                | 1299.0                      | 1303.7          | 1335.7          | 1361.8          | 1367.1 | 1382.5 | 1387.7 | 1391.7 |
|                                | 1399.3                      | 1406.9          | 1418.0          | 1454.1          | 1464.8 | 1485.2 | 1493.2 | 1496.6 |
|                                | 1503.9                      | 1506.8          | 1516.1          | 2959.2          | 2998.5 | 3035.2 | 3044.8 | 3048.8 |
|                                | 3058.3                      | 3062.3          | 3084.6          | 3092.8          | 3095.3 | 3099.2 | 3109.6 | 3114.7 |
|                                | 3128.7                      | 3138.4          | 3822.2          |                 |        |        |        |        |
| electronic state               | 2-A                         |                 |                 |                 |        |        |        |        |
| point group                    | C1                          |                 |                 |                 |        |        |        |        |
| rotational constants           | 1.34537                     | 1.01477         | 0.72676         |                 |        |        |        |        |
| ZPE                            | 0.238317 (Hartree/Particle) |                 |                 |                 |        |        |        |        |

|                                      |                             |                 |                 |                 |        |        |        |        |
|--------------------------------------|-----------------------------|-----------------|-----------------|-----------------|--------|--------|--------|--------|
| TS <sub>b</sub> γ'                   |                             |                 |                 |                 |        |        |        |        |
| optimized<br>Cartesian<br>coordinate | C                           | -1.283353000000 | 0.099798000000  | 1.094825000000  |        |        |        |        |
|                                      | C                           | 0.222824000000  | -0.021799000000 | 1.109640000000  |        |        |        |        |
|                                      | C                           | 0.783420000000  | -0.513382000000 | -0.231253000000 |        |        |        |        |
|                                      | H                           | -1.494555000000 | 1.040366000000  | 0.209121000000  |        |        |        |        |
|                                      | O                           | -1.538854000000 | 1.910220000000  | -0.638755000000 |        |        |        |        |
|                                      | O                           | -0.350016000000 | 2.607962000000  | -0.474251000000 |        |        |        |        |
|                                      | H                           | -0.607524000000 | 3.367626000000  | 0.063773000000  |        |        |        |        |
|                                      | C                           | -1.455261000000 | -1.573996000000 | -0.773627000000 |        |        |        |        |
|                                      | C                           | -2.033134000000 | -1.100930000000 | 0.562876000000  |        |        |        |        |
|                                      | H                           | -1.658572000000 | -0.816419000000 | -1.537994000000 |        |        |        |        |
|                                      | H                           | -1.952518000000 | -2.494660000000 | -1.089017000000 |        |        |        |        |
|                                      | H                           | 0.509606000000  | -0.738242000000 | 1.898222000000  |        |        |        |        |
|                                      | H                           | 0.668066000000  | 0.938617000000  | 1.380956000000  |        |        |        |        |
|                                      | H                           | -1.710472000000 | 0.537980000000  | 1.999159000000  |        |        |        |        |
|                                      | H                           | -1.944773000000 | -1.912552000000 | 1.301546000000  |        |        |        |        |
|                                      | H                           | -3.099264000000 | -0.877319000000 | 0.471754000000  |        |        |        |        |
|                                      | H                           | 0.581233000000  | 0.267499000000  | -0.976467000000 |        |        |        |        |
|                                      | C                           | 2.296142000000  | -0.734198000000 | -0.173115000000 |        |        |        |        |
|                                      | H                           | 2.624791000000  | -1.110879000000 | -1.147505000000 |        |        |        |        |
|                                      | C                           | 3.092220000000  | 0.523223000000  | 0.174982000000  |        |        |        |        |
| H                                    | 2.923294000000              | 0.835666000000  | 1.207588000000  |                 |        |        |        |        |
| H                                    | 4.164286000000              | 0.354830000000  | 0.055703000000  |                 |        |        |        |        |
| H                                    | 2.803736000000              | 1.353073000000  | -0.476105000000 |                 |        |        |        |        |
| C                                    | 0.055523000000              | -1.787793000000 | -0.670020000000 |                 |        |        |        |        |
| H                                    | 0.264035000000              | -2.586042000000 | 0.055986000000  |                 |        |        |        |        |
| H                                    | 0.454667000000              | -2.123677000000 | -1.632001000000 |                 |        |        |        |        |
| H                                    | 2.514632000000              | -1.526853000000 | 0.553485000000  |                 |        |        |        |        |
| frequencies                          | -1765.6                     | 56.1            | 70.6            | 88.0            | 104.5  | 149.5  | 202.0  | 220.9  |
|                                      | 240.8                       | 278.3           | 315.3           | 372.5           | 399.9  | 432.2  | 461.6  | 468.1  |
|                                      | 554.6                       | 602.6           | 764.1           | 796.9           | 803.5  | 859.7  | 889.9  | 901.5  |
|                                      | 936.1                       | 939.4           | 1000.5          | 1035.1          | 1060.9 | 1062.9 | 1070.9 | 1088.4 |
|                                      | 1125.6                      | 1132.9          | 1157.5          | 1163.3          | 1203.8 | 1234.0 | 1260.6 | 1285.3 |
|                                      | 1306.7                      | 1320.7          | 1333.2          | 1350.4          | 1373.8 | 1378.6 | 1388.8 | 1395.2 |
|                                      | 1406.4                      | 1412.3          | 1416.1          | 1460.7          | 1463.3 | 1472.8 | 1487.1 | 1494.4 |
|                                      | 1500.6                      | 1503.0          | 1515.3          | 2979.2          | 3001.1 | 3021.2 | 3033.1 | 3047.0 |
|                                      | 3057.7                      | 3059.4          | 3076.6          | 3088.0          | 3095.1 | 3101.0 | 3106.3 | 3111.5 |
|                                      | 3130.3                      | 3135.4          | 3820.7          |                 |        |        |        |        |
| electronic state                     | 2-A                         |                 |                 |                 |        |        |        |        |
| point group                          | C1                          |                 |                 |                 |        |        |        |        |
| rotational constants                 | 1.31487                     | 1.06534         | 0.72108         |                 |        |        |        |        |
| ZPE                                  | 0.238372 (Hartree/Particle) |                 |                 |                 |        |        |        |        |
| TS <sub>b</sub> δ'                   |                             |                 |                 |                 |        |        |        |        |
| optimized<br>Cartesian<br>coordinate | C                           | 1.422438000000  | 1.210469000000  | 0.361907000000  |        |        |        |        |
|                                      | C                           | 1.017305000000  | 0.311577000000  | 1.506106000000  |        |        |        |        |
|                                      | C                           | -0.077074000000 | -0.673356000000 | 1.086947000000  |        |        |        |        |
|                                      | C                           | -1.275527000000 | 0.025683000000  | 0.435954000000  |        |        |        |        |
|                                      | C                           | -2.345754000000 | -0.999263000000 | 0.050710000000  |        |        |        |        |
|                                      | C                           | -3.626520000000 | -0.389171000000 | -0.516870000000 |        |        |        |        |
|                                      | H                           | 1.939112000000  | 0.382673000000  | -0.510616000000 |        |        |        |        |
|                                      | O                           | 2.373095000000  | -0.488475000000 | -1.235539000000 |        |        |        |        |
|                                      | O                           | 2.838630000000  | -1.458936000000 | -0.358782000000 |        |        |        |        |
|                                      | H                           | 3.785928000000  | -1.278531000000 | -0.305724000000 |        |        |        |        |
|                                      | H                           | -4.394218000000 | -1.152572000000 | -0.657366000000 |        |        |        |        |
|                                      | C                           | -0.804561000000 | 0.852106000000  | -0.766225000000 |        |        |        |        |
|                                      | C                           | 0.276216000000  | 1.864967000000  | -0.374820000000 |        |        |        |        |
|                                      | H                           | -0.409752000000 | -1.248476000000 | 1.956277000000  |        |        |        |        |
|                                      | H                           | -1.713607000000 | 0.716925000000  | 1.172697000000  |        |        |        |        |
|                                      | H                           | -0.401552000000 | 0.168074000000  | -1.523603000000 |        |        |        |        |
|                                      | H                           | -1.644593000000 | 1.382140000000  | -1.221582000000 |        |        |        |        |
|                                      | H                           | 0.645976000000  | 0.946657000000  | 2.325446000000  |        |        |        |        |
|                                      | H                           | 1.884936000000  | -0.227721000000 | 1.894926000000  |        |        |        |        |
|                                      | H                           | 2.262998000000  | 1.873389000000  | 0.576889000000  |        |        |        |        |
| H                                    | -0.166348000000             | 2.623649000000  | 0.289026000000  |                 |        |        |        |        |
| H                                    | 0.641925000000              | 2.399403000000  | -1.255530000000 |                 |        |        |        |        |

|                                |                             |                 |                 |                 |        |        |        |        |
|--------------------------------|-----------------------------|-----------------|-----------------|-----------------|--------|--------|--------|--------|
|                                | H                           | 0.347766000000  | -1.388560000000 | 0.372767000000  |        |        |        |        |
|                                | H                           | -2.591994000000 | -1.591011000000 | 0.938897000000  |        |        |        |        |
|                                | H                           | -4.029535000000 | 0.369178000000  | 0.160670000000  |        |        |        |        |
|                                | H                           | -3.455503000000 | 0.084455000000  | -1.485405000000 |        |        |        |        |
|                                | H                           | -1.914487000000 | -1.698452000000 | -0.675460000000 |        |        |        |        |
| frequencies                    | -1752.8                     | 47.8            | 69.6            | 83.1            | 108.7  | 140.3  | 212.2  | 226.2  |
|                                | 246.8                       | 268.6           | 314.9           | 365.1           | 405.9  | 440.1  | 458.0  | 470.9  |
|                                | 549.2                       | 608.3           | 763.6           | 785.4           | 810.4  | 852.3  | 892.4  | 917.8  |
|                                | 935.6                       | 937.5           | 994.9           | 1034.4          | 1057.4 | 1061.7 | 1073.6 | 1100.8 |
|                                | 1113.2                      | 1129.6          | 1158.8          | 1171.2          | 1200.3 | 1223.8 | 1258.9 | 1296.6 |
|                                | 1302.6                      | 1314.8          | 1340.3          | 1352.5          | 1370.4 | 1379.0 | 1384.6 | 1395.8 |
|                                | 1407.4                      | 1412.0          | 1416.0          | 1459.1          | 1464.8 | 1475.4 | 1486.3 | 1492.3 |
|                                | 1501.7                      | 1506.3          | 1515.2          | 2997.0          | 2997.9 | 3001.9 | 3042.1 | 3046.5 |
|                                | 3053.7                      | 3058.4          | 3079.6          | 3093.5          | 3096.1 | 3098.7 | 3107.3 | 3110.4 |
|                                | 3127.0                      | 3138.9          | 3821.4          |                 |        |        |        |        |
| electronic state               | 2-A                         |                 |                 |                 |        |        |        |        |
| point group                    | C1                          |                 |                 |                 |        |        |        |        |
| rotational constants           | 1.89814                     | 0.71392         | 0.66667         |                 |        |        |        |        |
| ZPE                            | 0.238371 (Hartree/Particle) |                 |                 |                 |        |        |        |        |
| <i>n</i> PCH                   |                             |                 |                 |                 |        |        |        |        |
| optimized Cartesian coordinate | C                           | -0.457552000000 | 1.114257000000  | 0.255287000000  |        |        |        |        |
|                                | C                           | 0.042493000000  | -0.236934000000 | -0.269808000000 |        |        |        |        |
|                                | C                           | -0.920285000000 | -1.353391000000 | 0.151451000000  |        |        |        |        |
|                                | C                           | -2.360140000000 | -1.073379000000 | -0.282230000000 |        |        |        |        |
|                                | C                           | -2.842075000000 | 0.272815000000  | 0.260748000000  |        |        |        |        |
|                                | C                           | -1.900530000000 | 1.398131000000  | -0.170441000000 |        |        |        |        |
|                                | H                           | -0.577664000000 | -2.308933000000 | -0.258289000000 |        |        |        |        |
|                                | H                           | 0.042498000000  | -0.190171000000 | -1.369366000000 |        |        |        |        |
|                                | H                           | -0.396078000000 | 1.105683000000  | 1.352650000000  |        |        |        |        |
|                                | H                           | 0.193012000000  | 1.921234000000  | -0.092053000000 |        |        |        |        |
|                                | H                           | -2.409956000000 | -1.057484000000 | -1.377916000000 |        |        |        |        |
|                                | H                           | -3.019295000000 | -1.878807000000 | 0.053022000000  |        |        |        |        |
|                                | H                           | -3.861525000000 | 0.478468000000  | -0.076841000000 |        |        |        |        |
|                                | H                           | -2.871641000000 | 0.228291000000  | 1.356454000000  |        |        |        |        |
|                                | H                           | -1.937683000000 | 1.496789000000  | -1.262383000000 |        |        |        |        |
|                                | H                           | -2.232994000000 | 2.353813000000  | 0.244011000000  |        |        |        |        |
|                                | H                           | -0.886098000000 | -1.448608000000 | 1.245349000000  |        |        |        |        |
|                                | C                           | 1.467070000000  | -0.554088000000 | 0.191447000000  |        |        |        |        |
|                                | H                           | 1.738902000000  | -1.551436000000 | -0.176199000000 |        |        |        |        |
|                                | H                           | 1.479536000000  | -0.618838000000 | 1.287835000000  |        |        |        |        |
|                                | C                           | 2.531631000000  | 0.442909000000  | -0.265573000000 |        |        |        |        |
|                                | H                           | 2.352680000000  | 1.418095000000  | 0.196039000000  |        |        |        |        |
|                                | H                           | 2.445800000000  | 0.590476000000  | -1.348233000000 |        |        |        |        |
|                                | C                           | 3.943575000000  | -0.025176000000 | 0.080504000000  |        |        |        |        |
|                                | H                           | 4.696662000000  | 0.699961000000  | -0.234231000000 |        |        |        |        |
|                                | H                           | 4.049702000000  | -0.172129000000 | 1.158682000000  |        |        |        |        |
|                                | H                           | 4.169024000000  | -0.977278000000 | -0.406849000000 |        |        |        |        |
| frequencies                    | 70.4                        | 77.6            | 129.1           | 184.2           | 232.6  | 248.6  | 296.0  | 328.7  |
|                                | 358.7                       | 442.9           | 445.5           | 472.7           | 571.5  | 741.3  | 793.8  | 802.5  |
|                                | 848.8                       | 861.0           | 901.0           | 913.6           | 917.8  | 943.4  | 989.6  | 1039.8 |
|                                | 1058.5                      | 1060.6          | 1079.5          | 1089.6          | 1115.1 | 1129.3 | 1143.7 | 1190.1 |
|                                | 1218.7                      | 1247.4          | 1284.3          | 1291.0          | 1298.1 | 1307.0 | 1326.2 | 1339.4 |
|                                | 1353.6                      | 1367.9          | 1382.7          | 1386.0          | 1389.5 | 1403.1 | 1411.7 | 1414.1 |
|                                | 1479.2                      | 1485.5          | 1488.3          | 1489.7          | 1494.0 | 1497.5 | 1504.9 | 1508.4 |
|                                | 1512.4                      | 3002.9          | 3022.2          | 3022.9          | 3031.2 | 3036.6 | 3040.5 | 3045.0 |
|                                | 3049.1                      | 3055.7          | 3060.0          | 3083.2          | 3090.7 | 3093.6 | 3094.6 | 3098.7 |
|                                | 3101.9                      | 3126.3          | 3132.1          |                 |        |        |        |        |
| electronic state               | 1-A                         |                 |                 |                 |        |        |        |        |
| point group                    | C1                          |                 |                 |                 |        |        |        |        |
| rotational constants           | 3.74039                     | 0.77496         | 0.67882         |                 |        |        |        |        |
| ZPE                            | 0.256397 (Hartree/Particle) |                 |                 |                 |        |        |        |        |
| <i>n</i> PI                    |                             |                 |                 |                 |        |        |        |        |

|                                      |                             |                 |                 |                 |        |        |        |        |
|--------------------------------------|-----------------------------|-----------------|-----------------|-----------------|--------|--------|--------|--------|
| optimized<br>Cartesian<br>coordinate | C                           | 0.202686000000  | 0.986567000000  | -0.518677000000 |        |        |        |        |
|                                      | C                           | -0.222132000000 | -0.350625000000 | 0.098255000000  |        |        |        |        |
|                                      | C                           | -1.521826000000 | -0.889049000000 | -0.508423000000 |        |        |        |        |
|                                      | C                           | -2.714874000000 | 0.073818000000  | -0.438176000000 |        |        |        |        |
|                                      | C                           | -3.031115000000 | 0.514745000000  | 0.949173000000  |        |        |        |        |
|                                      | C                           | 0.899546000000  | -1.384726000000 | -0.048350000000 |        |        |        |        |
|                                      | C                           | 2.222394000000  | -0.889750000000 | 0.538062000000  |        |        |        |        |
|                                      | C                           | 2.637065000000  | 0.437416000000  | -0.099792000000 |        |        |        |        |
|                                      | C                           | 1.531660000000  | 1.482756000000  | 0.057189000000  |        |        |        |        |
|                                      | H                           | 0.599009000000  | -2.324577000000 | 0.426120000000  |        |        |        |        |
|                                      | H                           | -0.386928000000 | -0.180329000000 | 1.171862000000  |        |        |        |        |
|                                      | H                           | 0.298398000000  | 0.860026000000  | -1.606405000000 |        |        |        |        |
|                                      | H                           | -0.572385000000 | 1.739826000000  | -0.349981000000 |        |        |        |        |
|                                      | H                           | 2.107521000000  | -0.748585000000 | 1.619711000000  |        |        |        |        |
|                                      | H                           | 3.003562000000  | -1.641860000000 | 0.397620000000  |        |        |        |        |
|                                      | H                           | 3.569056000000  | 0.799602000000  | 0.342640000000  |        |        |        |        |
|                                      | H                           | 2.832152000000  | 0.276806000000  | -1.167360000000 |        |        |        |        |
|                                      | H                           | 1.396204000000  | 1.702337000000  | 1.123349000000  |        |        |        |        |
|                                      | H                           | 1.822648000000  | 2.420697000000  | -0.423644000000 |        |        |        |        |
|                                      | H                           | 1.039413000000  | -1.600924000000 | -1.116340000000 |        |        |        |        |
| H                                    | -1.788348000000             | -1.820146000000 | 0.006077000000  |                 |        |        |        |        |
| H                                    | -1.339887000000             | -1.154423000000 | -1.556725000000 |                 |        |        |        |        |
| H                                    | -3.587438000000             | -0.433668000000 | -0.877846000000 |                 |        |        |        |        |
| H                                    | -2.536439000000             | 0.944946000000  | -1.075623000000 |                 |        |        |        |        |
| H                                    | -2.960326000000             | -0.188745000000 | 1.770208000000  |                 |        |        |        |        |
| H                                    | -3.516635000000             | 1.462107000000  | 1.140768000000  |                 |        |        |        |        |
| frequencies                          | 62.2                        | 96.3            | 146.7           | 176.5           | 229.4  | 237.0  | 310.4  | 336.0  |
|                                      | 398.3                       | 437.2           | 444.7           | 464.8           | 504.2  | 547.3  | 764.4  | 798.0  |
|                                      | 830.8                       | 856.3           | 865.5           | 907.9           | 911.6  | 924.1  | 944.7  | 991.6  |
|                                      | 1038.7                      | 1059.3          | 1080.2          | 1088.7          | 1102.3 | 1127.1 | 1139.1 | 1172.8 |
|                                      | 1189.9                      | 1237.6          | 1241.6          | 1291.1          | 1292.3 | 1304.5 | 1323.0 | 1342.2 |
|                                      | 1365.8                      | 1373.7          | 1380.9          | 1386.0          | 1388.3 | 1398.1 | 1410.8 | 1465.6 |
|                                      | 1478.2                      | 1480.7          | 1487.4          | 1489.9          | 1493.3 | 1495.4 | 1508.7 | 2987.3 |
|                                      | 3013.2                      | 3021.7          | 3029.4          | 3036.3          | 3037.7 | 3041.1 | 3045.0 | 3069.5 |
|                                      | 3080.7                      | 3087.3          | 3093.5          | 3094.3          | 3095.4 | 3099.2 | 3163.6 | 3268.0 |
| electronic state                     | 2-A                         |                 |                 |                 |        |        |        |        |
| point group                          | C1                          |                 |                 |                 |        |        |        |        |
| rotational constants                 | 3.09872                     | 0.93739         | 0.82111         |                 |        |        |        |        |
| ZPE                                  | 0.241673 (Hartree/Particle) |                 |                 |                 |        |        |        |        |
| <i>n</i> P2                          |                             |                 |                 |                 |        |        |        |        |
| optimized<br>Cartesian<br>coordinate | C                           | -0.333155000000 | 1.073807000000  | 0.239858000000  |        |        |        |        |
|                                      | C                           | 0.063899000000  | -0.307684000000 | -0.292185000000 |        |        |        |        |
|                                      | C                           | 1.484291000000  | -0.687405000000 | 0.136792000000  |        |        |        |        |
|                                      | C                           | 2.545224000000  | 0.206202000000  | -0.411744000000 |        |        |        |        |
|                                      | C                           | 3.910631000000  | 0.220176000000  | 0.184515000000  |        |        |        |        |
|                                      | C                           | -0.953796000000 | -1.358979000000 | 0.160817000000  |        |        |        |        |
|                                      | C                           | -2.380941000000 | -0.986262000000 | -0.246413000000 |        |        |        |        |
|                                      | C                           | -2.763886000000 | 0.395436000000  | 0.288033000000  |        |        |        |        |
|                                      | C                           | -1.757840000000 | 1.454152000000  | -0.167978000000 |        |        |        |        |
|                                      | H                           | -0.684444000000 | -2.337643000000 | -0.249104000000 |        |        |        |        |
|                                      | H                           | 0.040921000000  | -0.267244000000 | -1.391526000000 |        |        |        |        |
|                                      | H                           | -0.261899000000 | 1.055218000000  | 1.336317000000  |        |        |        |        |
|                                      | H                           | 0.379984000000  | 1.826976000000  | -0.107771000000 |        |        |        |        |
|                                      | H                           | -2.451132000000 | -0.979406000000 | -1.341077000000 |        |        |        |        |
|                                      | H                           | -3.085635000000 | -1.742086000000 | 0.110890000000  |        |        |        |        |
|                                      | H                           | -3.773178000000 | 0.662827000000  | -0.036582000000 |        |        |        |        |
|                                      | H                           | -2.779515000000 | 0.364394000000  | 1.384485000000  |        |        |        |        |
|                                      | H                           | -1.805746000000 | 1.548032000000  | -1.259897000000 |        |        |        |        |
|                                      | H                           | -2.020281000000 | 2.431976000000  | 0.244925000000  |        |        |        |        |
|                                      | H                           | -0.901364000000 | -1.448265000000 | 1.254492000000  |        |        |        |        |
| H                                    | 1.677781000000              | -1.730341000000 | -0.168682000000 |                 |        |        |        |        |
| H                                    | 1.538419000000              | -0.691930000000 | 1.234996000000  |                 |        |        |        |        |
| H                                    | 2.404416000000              | 0.609479000000  | -1.409759000000 |                 |        |        |        |        |
| H                                    | 4.518864000000              | 1.036825000000  | -0.207597000000 |                 |        |        |        |        |
| H                                    | 3.863347000000              | 0.320387000000  | 1.273872000000  |                 |        |        |        |        |
| H                                    | 4.452902000000              | -0.715848000000 | -0.018145000000 |                 |        |        |        |        |



|                                |                             |                 |         |                 |        |        |                 |        |  |
|--------------------------------|-----------------------------|-----------------|---------|-----------------|--------|--------|-----------------|--------|--|
| frequencies                    | 47.1                        | 83.0            | 104.2   | 157.1           | 190.0  | 237.6  | 307.8           | 326.6  |  |
|                                | 355.8                       | 428.5           | 447.8   | 455.9           | 471.2  | 568.6  | 790.8           | 799.4  |  |
|                                | 840.3                       | 861.3           | 903.2   | 916.4           | 924.3  | 946.9  | 987.7           | 993.1  |  |
|                                | 1056.3                      | 1070.7          | 1075.1  | 1093.3          | 1118.0 | 1130.9 | 1147.9          | 1173.2 |  |
|                                | 1198.4                      | 1229.0          | 1275.5  | 1290.3          | 1296.4 | 1299.7 | 1336.1          | 1346.5 |  |
|                                | 1368.9                      | 1383.5          | 1387.2  | 1388.5          | 1401.4 | 1409.9 | 1429.8          | 1468.4 |  |
|                                | 1481.7                      | 1482.8          | 1487.9  | 1489.4          | 1491.4 | 1494.5 | 1508.6          | 2958.7 |  |
|                                | 2992.7                      | 3004.8          | 3023.1  | 3024.9          | 3033.6 | 3037.0 | 3040.6          | 3045.3 |  |
|                                | 3068.8                      | 3083.4          | 3091.1  | 3094.5          | 3095.1 | 3099.4 | 3129.8          | 3176.3 |  |
| electronic state               | 2-A                         |                 |         |                 |        |        |                 |        |  |
| point group                    | C1                          |                 |         |                 |        |        |                 |        |  |
| rotational constants           | 3.70566                     | 0.79848         | 0.69836 |                 |        |        |                 |        |  |
| ZPE                            | 0.241383 (Hartree/Particle) |                 |         |                 |        |        |                 |        |  |
| <i>n</i> P3                    |                             |                 |         |                 |        |        |                 |        |  |
| optimized Cartesian coordinate | C                           | -0.842099000000 |         | -1.353224000000 |        |        | -0.173493000000 |        |  |
|                                | C                           | 0.078779000000  |         | -0.189638000000 |        |        | 0.211054000000  |        |  |
|                                | C                           | 1.476601000000  |         | -0.399252000000 |        |        | -0.268437000000 |        |  |
|                                | C                           | 2.592414000000  |         | 0.494192000000  |        |        | 0.159805000000  |        |  |
|                                | C                           | 3.962396000000  |         | -0.179641000000 |        |        | 0.059303000000  |        |  |
|                                | H                           | 4.157651000000  |         | -0.500570000000 |        |        | -0.966902000000 |        |  |
|                                | C                           | -0.510471000000 |         | 1.141548000000  |        |        | -0.306995000000 |        |  |
|                                | C                           | -1.940236000000 |         | 1.357390000000  |        |        | 0.193565000000  |        |  |
|                                | C                           | -2.843609000000 |         | 0.184833000000  |        |        | -0.193527000000 |        |  |
|                                | C                           | -2.273231000000 |         | -1.138401000000 |        |        | 0.321542000000  |        |  |
|                                | H                           | 0.130951000000  |         | 1.973279000000  |        |        | -0.000841000000 |        |  |
|                                | H                           | 0.098109000000  |         | -0.117990000000 |        |        | 1.311086000000  |        |  |
|                                | H                           | -0.846523000000 |         | -1.444365000000 |        |        | -1.267835000000 |        |  |
|                                | H                           | -0.434352000000 |         | -2.288452000000 |        |        | 0.221273000000  |        |  |
|                                | H                           | -1.926730000000 |         | 1.455591000000  |        |        | 1.286033000000  |        |  |
|                                | H                           | -2.340363000000 |         | 2.294366000000  |        |        | -0.203516000000 |        |  |
|                                | H                           | -3.854583000000 |         | 0.339832000000  |        |        | 0.192888000000  |        |  |
|                                | H                           | -2.923645000000 |         | 0.139804000000  |        |        | -1.286622000000 |        |  |
|                                | H                           | -2.276452000000 |         | -1.128185000000 |        |        | 1.418397000000  |        |  |
|                                | H                           | -2.908374000000 |         | -1.972668000000 |        |        | 0.011673000000  |        |  |
|                                | H                           | -0.503216000000 |         | 1.118380000000  |        |        | -1.404470000000 |        |  |
|                                | H                           | 1.640515000000  |         | -1.051784000000 |        |        | -1.122812000000 |        |  |
|                                | H                           | 2.602961000000  |         | 1.411050000000  |        |        | -0.450767000000 |        |  |
|                                | H                           | 4.763686000000  |         | 0.498828000000  |        |        | 0.358256000000  |        |  |
|                                | H                           | 4.004282000000  |         | -1.063892000000 |        |        | 0.698828000000  |        |  |
|                                | H                           | 2.412823000000  |         | 0.829931000000  |        |        | 1.188428000000  |        |  |
| frequencies                    | 47.3                        | 55.9            | 113.4   | 189.2           | 239.3  | 241.5  | 282.1           | 310.6  |  |
|                                | 362.1                       | 394.7           | 446.3   | 467.2           | 491.2  | 585.8  | 770.5           | 796.7  |  |
|                                | 807.0                       | 859.1           | 897.5   | 903.7           | 917.7  | 940.5  | 994.4           | 1041.4 |  |
|                                | 1052.0                      | 1062.4          | 1072.2  | 1091.1          | 1117.2 | 1124.0 | 1163.5          | 1170.3 |  |
|                                | 1213.7                      | 1243.5          | 1277.7  | 1286.3          | 1293.4 | 1300.1 | 1324.8          | 1338.4 |  |
|                                | 1357.8                      | 1370.1          | 1385.3  | 1387.8          | 1394.1 | 1410.7 | 1438.2          | 1477.8 |  |
|                                | 1482.7                      | 1486.7          | 1489.7  | 1494.6          | 1501.6 | 1507.7 | 1508.5          | 2978.7 |  |
|                                | 2981.4                      | 3030.7          | 3035.7  | 3037.6          | 3042.0 | 3045.9 | 3050.9          | 3060.4 |  |
|                                | 3090.8                      | 3092.3          | 3094.8  | 3095.5          | 3100.2 | 3131.2 | 3137.7          | 3158.0 |  |
| electronic state               | 2-A                         |                 |         |                 |        |        |                 |        |  |
| point group                    | C1                          |                 |         |                 |        |        |                 |        |  |
| rotational constants           | 3.80446                     | 0.77578         | 0.68024 |                 |        |        |                 |        |  |
| ZPE                            | 0.241812 (Hartree/Particle) |                 |         |                 |        |        |                 |        |  |
| <i>n</i> P4                    |                             |                 |         |                 |        |        |                 |        |  |
| optimized Cartesian coordinate | C                           | -0.575844000000 |         | -1.061454000000 |        |        | -0.921993000000 |        |  |
|                                | C                           | 0.173126000000  |         | 0.195647000000  |        |        | -0.608397000000 |        |  |
|                                | C                           | 1.608266000000  |         | 0.368588000000  |        |        | -0.995908000000 |        |  |
|                                | C                           | 2.546075000000  |         | 0.467727000000  |        |        | 0.222872000000  |        |  |
|                                | C                           | 2.561207000000  |         | -0.817473000000 |        |        | 1.046686000000  |        |  |
|                                | H                           | 3.234929000000  |         | -0.737003000000 |        |        | 1.902057000000  |        |  |
|                                | C                           | -0.636385000000 |         | 1.399541000000  |        |        | -0.238393000000 |        |  |
|                                | C                           | -1.722971000000 |         | 1.071113000000  |        |        | 0.794415000000  |        |  |

|                                |                             |                 |                 |                 |        |        |        |        |  |
|--------------------------------|-----------------------------|-----------------|-----------------|-----------------|--------|--------|--------|--------|--|
|                                | C                           | -2.554665000000 | -0.131854000000 | 0.346087000000  |        |        |        |        |  |
|                                | C                           | -1.666607000000 | -1.356263000000 | 0.117865000000  |        |        |        |        |  |
|                                | H                           | 0.014744000000  | 2.198453000000  | 0.130477000000  |        |        |        |        |  |
|                                | H                           | -1.060316000000 | -0.967635000000 | -1.910763000000 |        |        |        |        |  |
|                                | H                           | 0.116673000000  | -1.905258000000 | -0.999441000000 |        |        |        |        |  |
|                                | H                           | -1.243761000000 | 0.838087000000  | 1.752356000000  |        |        |        |        |  |
|                                | H                           | -2.364314000000 | 1.941805000000  | 0.955867000000  |        |        |        |        |  |
|                                | H                           | -3.325272000000 | -0.357139000000 | 1.088184000000  |        |        |        |        |  |
|                                | H                           | -3.074424000000 | 0.116844000000  | -0.587946000000 |        |        |        |        |  |
|                                | H                           | -1.189079000000 | -1.632400000000 | 1.065147000000  |        |        |        |        |  |
|                                | H                           | -2.267876000000 | -2.211514000000 | -0.202220000000 |        |        |        |        |  |
|                                | H                           | -1.129033000000 | 1.798953000000  | -1.143263000000 |        |        |        |        |  |
|                                | H                           | 1.724848000000  | 1.278224000000  | -1.600940000000 |        |        |        |        |  |
|                                | H                           | 1.933789000000  | -0.471306000000 | -1.620413000000 |        |        |        |        |  |
|                                | H                           | 2.225380000000  | 1.305337000000  | 0.851414000000  |        |        |        |        |  |
|                                | H                           | 3.558187000000  | 0.702127000000  | -0.121119000000 |        |        |        |        |  |
|                                | H                           | 1.561044000000  | -1.047050000000 | 1.423825000000  |        |        |        |        |  |
|                                | H                           | 2.891260000000  | -1.663958000000 | 0.437378000000  |        |        |        |        |  |
| frequencies                    | 35.5                        | 46.3            | 107.4           | 180.3           | 217.2  | 255.0  | 295.3  | 360.2  |  |
|                                | 374.6                       | 406.1           | 442.0           | 467.6           | 545.7  | 727.2  | 790.8  | 796.0  |  |
|                                | 851.7                       | 854.3           | 865.2           | 890.4           | 924.0  | 930.7  | 985.6  | 1038.2 |  |
|                                | 1051.9                      | 1061.9          | 1082.0          | 1096.6          | 1103.5 | 1109.8 | 1173.3 | 1192.8 |  |
|                                | 1226.2                      | 1255.6          | 1282.7          | 1285.2          | 1307.8 | 1317.7 | 1355.2 | 1359.7 |  |
|                                | 1364.0                      | 1375.5          | 1380.3          | 1387.1          | 1409.3 | 1415.4 | 1466.3 | 1474.5 |  |
|                                | 1484.2                      | 1486.4          | 1490.9          | 1491.0          | 1502.6 | 1504.8 | 1508.5 | 2945.1 |  |
|                                | 2948.1                      | 3013.4          | 3035.2          | 3046.2          | 3048.3 | 3050.4 | 3052.8 | 3068.9 |  |
|                                | 3076.9                      | 3080.6          | 3090.2          | 3095.9          | 3096.9 | 3100.4 | 3122.2 | 3132.6 |  |
| electronic state               | 2-A                         |                 |                 |                 |        |        |        |        |  |
| point group                    | C1                          |                 |                 |                 |        |        |        |        |  |
| rotational constants           | 2.60410                     | 1.00754         | 0.92530         |                 |        |        |        |        |  |
| ZPE                            | 0.242382 (Hartree/Particle) |                 |                 |                 |        |        |        |        |  |
|                                |                             |                 |                 |                 |        |        |        |        |  |
| <i>n</i> P5                    |                             |                 |                 |                 |        |        |        |        |  |
| optimized Cartesian coordinate | C                           | 0.455933000000  | 1.075456000000  | -0.205759000000 |        |        |        |        |  |
|                                | C                           | 1.858835000000  | 1.449896000000  | 0.140089000000  |        |        |        |        |  |
|                                | C                           | 2.833237000000  | 0.332993000000  | -0.286945000000 |        |        |        |        |  |
|                                | C                           | 0.949794000000  | -1.352364000000 | -0.158668000000 |        |        |        |        |  |
|                                | C                           | -0.045518000000 | -0.251634000000 | 0.268339000000  |        |        |        |        |  |
|                                | H                           | 3.846300000000  | 0.567583000000  | 0.051820000000  |        |        |        |        |  |
|                                | H                           | 0.909874000000  | -1.452302000000 | -1.250716000000 |        |        |        |        |  |
|                                | H                           | 0.637263000000  | -2.311876000000 | 0.266108000000  |        |        |        |        |  |
|                                | H                           | 1.949711000000  | 1.575279000000  | 1.229615000000  |        |        |        |        |  |
|                                | H                           | 2.140371000000  | 2.401142000000  | -0.315637000000 |        |        |        |        |  |
|                                | H                           | -0.091066000000 | 1.621402000000  | -0.966143000000 |        |        |        |        |  |
|                                | H                           | -0.047953000000 | -0.245529000000 | 1.372414000000  |        |        |        |        |  |
|                                | H                           | 2.858570000000  | 0.282195000000  | -1.381171000000 |        |        |        |        |  |
|                                | C                           | 2.380067000000  | -1.017758000000 | 0.271015000000  |        |        |        |        |  |
|                                | H                           | 3.063427000000  | -1.807466000000 | -0.052991000000 |        |        |        |        |  |
|                                | H                           | 2.427544000000  | -0.987666000000 | 1.366769000000  |        |        |        |        |  |
|                                | C                           | -1.464417000000 | -0.556355000000 | -0.210495000000 |        |        |        |        |  |
|                                | H                           | -1.722981000000 | -1.585960000000 | 0.064379000000  |        |        |        |        |  |
|                                | H                           | -1.483089000000 | -0.514355000000 | -1.307547000000 |        |        |        |        |  |
|                                | C                           | -2.520481000000 | 0.391309000000  | 0.355623000000  |        |        |        |        |  |
|                                | H                           | -2.268600000000 | 1.422683000000  | 0.089644000000  |        |        |        |        |  |
|                                | H                           | -2.492235000000 | 0.341810000000  | 1.449718000000  |        |        |        |        |  |
|                                | C                           | -3.925648000000 | 0.059062000000  | -0.140349000000 |        |        |        |        |  |
|                                | H                           | -4.207757000000 | -0.959062000000 | 0.140859000000  |        |        |        |        |  |
|                                | H                           | -4.670507000000 | 0.740189000000  | 0.275810000000  |        |        |        |        |  |
|                                | H                           | -3.979682000000 | 0.128302000000  | -1.230032000000 |        |        |        |        |  |
| frequencies                    | 57.3                        | 76.8            | 92.7            | 146.4           | 192.7  | 246.2  | 274.5  | 299.2  |  |
|                                | 328.1                       | 356.2           | 450.3           | 466.7           | 511.5  | 588.2  | 741.8  | 801.9  |  |
|                                | 837.9                       | 857.7           | 874.8           | 904.6           | 921.8  | 945.2  | 973.4  | 1038.8 |  |
|                                | 1048.4                      | 1065.6          | 1075.4          | 1100.0          | 1108.6 | 1143.2 | 1152.9 | 1163.0 |  |
|                                | 1215.4                      | 1243.8          | 1261.7          | 1287.1          | 1294.6 | 1314.0 | 1331.0 | 1340.6 |  |
|                                | 1346.5                      | 1354.7          | 1368.0          | 1384.5          | 1402.7 | 1413.6 | 1424.2 | 1479.6 |  |
|                                | 1482.4                      | 1488.9          | 1490.9          | 1496.9          | 1501.2 | 1504.6 | 1512.0 | 2962.1 |  |
|                                | 2999.5                      | 3027.6          | 3035.3          | 3039.2          | 3049.5 | 3051.2 | 3055.6 | 3064.1 |  |

|                                |                             |                 |         |                 |        |                 |        |        |
|--------------------------------|-----------------------------|-----------------|---------|-----------------|--------|-----------------|--------|--------|
|                                | 3085.4                      | 3091.2          | 3094.8  | 3099.7          | 3110.0 | 3124.7          | 3132.9 | 3190.0 |
| electronic state               | 2-A                         |                 |         |                 |        |                 |        |        |
| point group                    | C1                          |                 |         |                 |        |                 |        |        |
| rotational constants           | 3.82023                     | 0.77981         | 0.68530 |                 |        |                 |        |        |
| ZPE                            | 0.241472 (Hartree/Particle) |                 |         |                 |        |                 |        |        |
| <i>nP6</i>                     |                             |                 |         |                 |        |                 |        |        |
| optimized Cartesian coordinate | C                           | 1.581136000000  |         | 1.478020000000  |        | -0.015119000000 |        |        |
|                                | C                           | 0.245790000000  |         | 1.023312000000  |        | -0.504675000000 |        |        |
|                                | C                           | -0.157207000000 |         | -0.340994000000 |        | 0.083946000000  |        |        |
|                                | C                           | 2.282756000000  |         | -0.842655000000 |        | 0.579406000000  |        |        |
|                                | C                           | 2.712564000000  |         | 0.504351000000  |        | -0.021135000000 |        |        |
|                                | H                           | 2.115517000000  |         | -0.717767000000 |        | 1.654880000000  |        |        |
|                                | H                           | 3.081573000000  |         | -1.579361000000 |        | 0.459066000000  |        |        |
|                                | H                           | 0.264504000000  |         | 0.915024000000  |        | -1.605441000000 |        |        |
|                                | H                           | -0.515171000000 |         | 1.777149000000  |        | -0.286122000000 |        |        |
|                                | H                           | 1.779670000000  |         | 2.536450000000  |        | 0.099046000000  |        |        |
|                                | H                           | 3.041341000000  |         | 0.324109000000  |        | -1.059291000000 |        |        |
|                                | H                           | 3.577551000000  |         | 0.908033000000  |        | 0.510264000000  |        |        |
|                                | H                           | -0.325192000000 |         | -0.202496000000 |        | 1.160150000000  |        |        |
|                                | C                           | 0.993881000000  |         | -1.339970000000 |        | -0.075337000000 |        |        |
|                                | H                           | 1.171716000000  |         | -1.505621000000 |        | -1.146978000000 |        |        |
|                                | H                           | 0.701001000000  |         | -2.305772000000 |        | 0.348695000000  |        |        |
|                                | C                           | -1.438156000000 |         | -0.887910000000 |        | -0.552533000000 |        |        |
|                                | H                           | -1.228306000000 |         | -1.130595000000 |        | -1.601674000000 |        |        |
|                                | H                           | -1.691527000000 |         | -1.834866000000 |        | -0.060303000000 |        |        |
|                                | C                           | -2.651953000000 |         | 0.043871000000  |        | -0.487325000000 |        |        |
|                                | H                           | -2.472453000000 |         | 0.932051000000  |        | -1.101177000000 |        |        |
|                                | H                           | -3.505956000000 |         | -0.467931000000 |        | -0.940719000000 |        |        |
|                                | C                           | -3.014008000000 |         | 0.467049000000  |        | 0.935624000000  |        |        |
|                                | H                           | -2.232637000000 |         | 1.087603000000  |        | 1.381072000000  |        |        |
|                                | H                           | -3.942299000000 |         | 1.041407000000  |        | 0.953021000000  |        |        |
|                                | H                           | -3.148150000000 |         | -0.407870000000 |        | 1.578394000000  |        |        |
| frequencies                    | 78.4                        | 91.1            | 162.3   | 178.8           | 202.9  | 267.7           | 296.7  | 312.8  |
|                                | 370.6                       | 405.5           | 429.8   | 467.0           | 501.3  | 615.2           | 747.9  | 800.5  |
|                                | 844.6                       | 854.1           | 866.9   | 892.7           | 922.7  | 940.2           | 967.3  | 1017.8 |
|                                | 1049.6                      | 1067.8          | 1084.2  | 1106.8          | 1125.1 | 1127.4          | 1136.1 | 1165.8 |
|                                | 1214.4                      | 1241.1          | 1273.5  | 1289.4          | 1302.4 | 1324.0          | 1330.5 | 1360.0 |
|                                | 1365.6                      | 1369.2          | 1380.2  | 1389.8          | 1403.2 | 1409.4          | 1417.3 | 1467.3 |
|                                | 1473.0                      | 1482.1          | 1491.7  | 1498.2          | 1500.1 | 1507.5          | 1515.2 | 2939.1 |
|                                | 2959.9                      | 3021.2          | 3029.7  | 3036.7          | 3051.2 | 3055.5          | 3058.6 | 3072.8 |
|                                | 3084.5                      | 3090.6          | 3096.6  | 3098.7          | 3100.6 | 3125.3          | 3133.8 | 3205.4 |
| electronic state               | 2-A                         |                 |         |                 |        |                 |        |        |
| point group                    | C1                          |                 |         |                 |        |                 |        |        |
| rotational constants           | 3.15993                     | 0.91640         | 0.81109 |                 |        |                 |        |        |
| ZPE                            | 0.242085 (Hartree/Particle) |                 |         |                 |        |                 |        |        |
| <i>nP7</i>                     |                             |                 |         |                 |        |                 |        |        |
| optimized Cartesian coordinate | C                           | 2.853708000000  |         | 0.284427000000  |        | -0.155833000000 |        |        |
|                                | C                           | 2.407210000000  |         | -1.080874000000 |        | 0.249418000000  |        |        |
|                                | C                           | 0.963227000000  |         | -1.347379000000 |        | -0.199537000000 |        |        |
|                                | C                           | 0.008390000000  |         | -0.229548000000 |        | 0.234128000000  |        |        |
|                                | C                           | -1.424166000000 |         | -0.553899000000 |        | -0.197692000000 |        |        |
|                                | C                           | -2.483623000000 |         | 0.442161000000  |        | 0.273220000000  |        |        |
|                                | C                           | -3.900014000000 |         | -0.037067000000 |        | -0.037687000000 |        |        |
|                                | H                           | -4.109577000000 |         | -0.985427000000 |        | 0.463804000000  |        |        |
|                                | C                           | 0.494535000000  |         | 1.115778000000  |        | -0.316631000000 |        |        |
|                                | C                           | 1.934809000000  |         | 1.427269000000  |        | 0.120609000000  |        |        |
|                                | H                           | 0.617782000000  |         | -2.306572000000 |        | 0.198742000000  |        |        |
|                                | H                           | 0.029491000000  |         | -0.172867000000 |        | 1.333422000000  |        |        |
|                                | H                           | 0.448074000000  |         | 1.080091000000  |        | -1.412725000000 |        |        |
|                                | H                           | -0.164324000000 |         | 1.924607000000  |        | 0.009379000000  |        |        |
|                                | H                           | 2.445677000000  |         | -1.172063000000 |        | 1.348763000000  |        |        |
|                                | H                           | 3.079658000000  |         | -1.845993000000 |        | -0.145700000000 |        |        |

|                                |                             |         |                 |        |                 |        |                 |        |  |
|--------------------------------|-----------------------------|---------|-----------------|--------|-----------------|--------|-----------------|--------|--|
|                                | H                           |         | 3.896884000000  |        | 0.470374000000  |        | -0.379641000000 |        |  |
|                                | H                           |         | 1.921662000000  |        | 1.635615000000  |        | 1.204645000000  |        |  |
|                                | H                           |         | 2.290598000000  |        | 2.340721000000  |        | -0.361822000000 |        |  |
|                                | H                           |         | 0.936481000000  |        | -1.423621000000 |        | -1.293684000000 |        |  |
|                                | H                           |         | -1.685176000000 |        | -1.549295000000 |        | 0.182517000000  |        |  |
|                                | H                           |         | -1.457176000000 |        | -0.626849000000 |        | -1.293025000000 |        |  |
|                                | H                           |         | -2.320825000000 |        | 1.413903000000  |        | -0.201269000000 |        |  |
|                                | H                           |         | -2.375132000000 |        | 0.600236000000  |        | 1.352342000000  |        |  |
|                                | H                           |         | -4.650080000000 |        | 0.687169000000  |        | 0.286110000000  |        |  |
|                                | H                           |         | -4.028472000000 |        | -0.195239000000 |        | -1.111822000000 |        |  |
| frequencies                    | 66.8                        | 74.1    | 125.6           | 161.1  | 211.7           | 242.3  | 252.3           | 296.5  |  |
|                                | 351.6                       | 358.9   | 446.8           | 449.2  | 517.1           | 637.8  | 741.5           | 781.8  |  |
|                                | 808.4                       | 864.1   | 897.7           | 907.9  | 920.0           | 954.7  | 979.8           | 1029.7 |  |
|                                | 1043.8                      | 1062.7  | 1080.0          | 1106.3 | 1111.2          | 1129.1 | 1149.0          | 1166.8 |  |
|                                | 1229.7                      | 1235.9  | 1276.4          | 1287.0 | 1303.6          | 1317.9 | 1330.1          | 1342.9 |  |
|                                | 1350.6                      | 1372.6  | 1380.8          | 1400.8 | 1403.5          | 1412.0 | 1414.2          | 1469.5 |  |
|                                | 1477.6                      | 1480.6  | 1487.7          | 1495.2 | 1499.4          | 1505.0 | 1512.3          | 2956.9 |  |
|                                | 2960.2                      | 3000.4  | 3024.3          | 3035.9 | 3041.6          | 3049.2 | 3055.8          | 3061.1 |  |
|                                | 3087.6                      | 3092.9  | 3096.9          | 3097.7 | 3105.7          | 3126.4 | 3132.6          | 3203.8 |  |
| electronic state               | 2-A                         |         |                 |        |                 |        |                 |        |  |
| point group                    | C1                          |         |                 |        |                 |        |                 |        |  |
| rotational constants           | 3.76228                     | 0.79112 | 0.68784         |        |                 |        |                 |        |  |
| ZPE                            | 0.241578 (Hartree/Particle) |         |                 |        |                 |        |                 |        |  |
|                                |                             |         |                 |        |                 |        |                 |        |  |
| TS <sub>c</sub> $\gamma$       |                             |         |                 |        |                 |        |                 |        |  |
| optimized Cartesian coordinate | C                           |         | 1.509919000000  |        | 1.227803000000  |        | 0.207666000000  |        |  |
|                                | C                           |         | 0.649951000000  |        | -0.022055000000 |        | -0.014419000000 |        |  |
|                                | C                           |         | -0.681171000000 |        | 0.293822000000  |        | -0.697650000000 |        |  |
|                                | C                           |         | -1.574598000000 |        | 1.260214000000  |        | 0.082009000000  |        |  |
|                                | C                           |         | -2.960150000000 |        | 1.355658000000  |        | -0.493545000000 |        |  |
|                                | H                           |         | -3.457351000000 |        | 0.125147000000  |        | -0.344174000000 |        |  |
|                                | O                           |         | -3.747573000000 |        | -0.997531000000 |        | -0.106221000000 |        |  |
|                                | O                           |         | -2.954941000000 |        | -1.335219000000 |        | 0.983600000000  |        |  |
|                                | H                           |         | -3.551072000000 |        | -1.226734000000 |        | 1.735782000000  |        |  |
|                                | C                           |         | 1.432323000000  |        | -1.063039000000 |        | -0.822960000000 |        |  |
|                                | C                           |         | 2.774797000000  |        | -1.407419000000 |        | -0.176027000000 |        |  |
|                                | C                           |         | 3.621847000000  |        | -0.150306000000 |        | 0.028481000000  |        |  |
|                                | C                           |         | 2.858088000000  |        | 0.889596000000  |        | 0.849701000000  |        |  |
|                                | H                           |         | 0.824051000000  |        | -1.964370000000 |        | -0.945405000000 |        |  |
|                                | H                           |         | 0.425858000000  |        | -0.459875000000 |        | 0.969806000000  |        |  |
|                                | H                           |         | 1.680307000000  |        | 1.711412000000  |        | -0.764613000000 |        |  |
|                                | H                           |         | 0.978217000000  |        | 1.951071000000  |        | 0.832629000000  |        |  |
|                                | H                           |         | 2.594577000000  |        | -1.881770000000 |        | 0.796389000000  |        |  |
|                                | H                           |         | 3.313594000000  |        | -2.135606000000 |        | -0.788325000000 |        |  |
|                                | H                           |         | 4.567414000000  |        | -0.401240000000 |        | 0.516816000000  |        |  |
|                                | H                           |         | 3.872010000000  |        | 0.277337000000  |        | -0.950304000000 |        |  |
|                                | H                           |         | 2.683311000000  |        | 0.491616000000  |        | 1.856896000000  |        |  |
|                                | H                           |         | 3.456355000000  |        | 1.797200000000  |        | 0.968154000000  |        |  |
|                                | H                           |         | 1.610763000000  |        | -0.661385000000 |        | -1.829836000000 |        |  |
|                                | H                           |         | -1.229204000000 |        | -0.642390000000 |        | -0.846738000000 |        |  |
|                                | H                           |         | -0.484883000000 |        | 0.708227000000  |        | -1.695420000000 |        |  |
|                                | H                           |         | -1.132313000000 |        | 2.266235000000  |        | 0.090716000000  |        |  |
|                                | H                           |         | -1.629687000000 |        | 0.943222000000  |        | 1.129852000000  |        |  |
|                                | H                           |         | -3.671644000000 |        | 1.980262000000  |        | 0.044939000000  |        |  |
|                                | H                           |         | -3.016229000000 |        | 1.477998000000  |        | -1.575741000000 |        |  |
| frequencies                    | -1816.7                     | 24.2    | 43.7            | 75.1   | 96.5            | 132.4  | 176.0           | 200.0  |  |
|                                | 233.7                       | 249.5   | 320.5           | 332.0  | 360.6           | 391.5  | 445.2           | 445.7  |  |
|                                | 477.2                       | 513.7   | 567.0           | 581.2  | 738.7           | 795.3  | 804.3           | 857.7  |  |
|                                | 872.6                       | 899.0   | 911.0           | 932.5  | 946.2           | 990.9  | 1037.5          | 1058.4 |  |
|                                | 1066.2                      | 1071.2  | 1088.2          | 1093.8 | 1110.1          | 1126.0 | 1135.2          | 1167.7 |  |
|                                | 1184.4                      | 1216.1  | 1230.1          | 1274.0 | 1291.7          | 1296.1 | 1303.6          | 1323.3 |  |
|                                | 1343.4                      | 1351.8  | 1369.0          | 1384.9 | 1387.0          | 1391.4 | 1406.1          | 1406.9 |  |
|                                | 1413.2                      | 1456.0  | 1464.8          | 1470.6 | 1481.1          | 1486.1 | 1489.5          | 1492.9 |  |
|                                | 1496.7                      | 1509.0  | 3007.0          | 3016.4 | 3022.0          | 3026.7 | 3035.5          | 3037.0 |  |
|                                | 3041.1                      | 3045.5  | 3066.4          | 3087.4 | 3091.9          | 3093.7 | 3094.2          | 3095.4 |  |
|                                | 3099.5                      | 3100.7  | 3185.7          | 3822.1 |                 |        |                 |        |  |

|                                |                             |                 |         |                 |         |                 |        |        |
|--------------------------------|-----------------------------|-----------------|---------|-----------------|---------|-----------------|--------|--------|
| electronic state               | 2-A                         |                 |         |                 |         |                 |        |        |
| point group                    | C1                          |                 |         |                 |         |                 |        |        |
| rotational constants           | 1.97828                     |                 | 0.45552 |                 | 0.40999 |                 |        |        |
| ZPE                            | 0.267129 (Hartree/Particle) |                 |         |                 |         |                 |        |        |
| TS <sub>β</sub>                |                             |                 |         |                 |         |                 |        |        |
| optimized Cartesian coordinate | C                           | 1.714482000000  |         | -1.288955000000 |         | 0.626426000000  |        |        |
|                                | C                           | 0.589213000000  |         | -0.677542000000 |         | -0.216195000000 |        |        |
|                                | C                           | -0.781235000000 |         | -1.131374000000 |         | 0.290872000000  |        |        |
|                                | C                           | -1.943701000000 |         | -0.857198000000 |         | -0.632354000000 |        |        |
|                                | C                           | -3.266609000000 |         | -1.446952000000 |         | -0.210492000000 |        |        |
|                                | H                           | -2.192545000000 |         | 0.431095000000  |         | -0.569560000000 |        |        |
|                                | O                           | -2.516759000000 |         | 1.563789000000  |         | -0.317390000000 |        |        |
|                                | O                           | -2.277536000000 |         | 1.682521000000  |         | 1.042852000000  |        |        |
|                                | H                           | -1.389750000000 |         | 2.064331000000  |         | 1.080126000000  |        |        |
|                                | C                           | 0.730052000000  |         | 0.849805000000  |         | -0.236619000000 |        |        |
|                                | C                           | 2.107358000000  |         | 1.288493000000  |         | -0.739372000000 |        |        |
|                                | C                           | 3.223354000000  |         | 0.667372000000  |         | 0.102184000000  |        |        |
|                                | C                           | 3.097658000000  |         | -0.856985000000 |         | 0.135059000000  |        |        |
|                                | H                           | -0.058497000000 |         | 1.300776000000  |         | -0.846106000000 |        |        |
|                                | H                           | 0.708300000000  |         | -1.039834000000 |         | -1.247994000000 |        |        |
|                                | H                           | 1.582865000000  |         | -0.971963000000 |         | 1.669994000000  |        |        |
|                                | H                           | 1.633170000000  |         | -2.380378000000 |         | 0.616043000000  |        |        |
|                                | H                           | 2.223085000000  |         | 0.973584000000  |         | -1.783436000000 |        |        |
|                                | H                           | 2.182495000000  |         | 2.379062000000  |         | -0.728834000000 |        |        |
|                                | H                           | 4.202141000000  |         | 0.960160000000  |         | -0.286747000000 |        |        |
|                                | H                           | 3.158921000000  |         | 1.055443000000  |         | 1.126243000000  |        |        |
|                                | H                           | 3.257451000000  |         | -1.251818000000 |         | -0.875697000000 |        |        |
|                                | H                           | 3.875413000000  |         | -1.289738000000 |         | 0.769817000000  |        |        |
|                                | H                           | 0.603229000000  |         | 1.212184000000  |         | 0.795226000000  |        |        |
|                                | H                           | -0.984163000000 |         | -0.681097000000 |         | 1.272943000000  |        |        |
|                                | H                           | -0.750795000000 |         | -2.217846000000 |         | 0.468085000000  |        |        |
|                                | H                           | -1.708382000000 |         | -0.983053000000 |         | -1.692924000000 |        |        |
|                                | H                           | -4.075730000000 |         | -1.134413000000 |         | -0.871737000000 |        |        |
|                                | H                           | -3.220434000000 |         | -2.542595000000 |         | -0.223048000000 |        |        |
|                                | H                           | -3.515847000000 |         | -1.134354000000 |         | 0.806860000000  |        |        |
| frequencies                    | -1793.8                     | 34.5            | 67.2    | 83.5            | 109.2   | 123.5           | 153.8  | 195.2  |
|                                | 214.3                       | 242.9           | 279.4   | 315.6           | 337.3   | 376.2           | 428.4  | 450.8  |
|                                | 459.6                       | 478.5           | 566.0   | 575.3           | 787.0   | 805.1           | 817.2  | 859.0  |
|                                | 865.6                       | 908.2           | 918.8   | 921.9           | 949.6   | 992.4           | 1048.6 | 1059.2 |
|                                | 1068.4                      | 1075.2          | 1085.0  | 1094.6          | 1119.2  | 1133.6          | 1146.8 | 1162.6 |
|                                | 1186.9                      | 1215.3          | 1242.7  | 1284.9          | 1291.1  | 1297.0          | 1301.0 | 1338.3 |
|                                | 1343.9                      | 1368.1          | 1382.1  | 1387.7          | 1390.1  | 1395.7          | 1409.0 | 1413.7 |
|                                | 1417.5                      | 1464.6          | 1470.0  | 1486.5          | 1488.8  | 1489.1          | 1492.3 | 1494.6 |
|                                | 1500.5                      | 1514.8          | 2994.9  | 2998.4          | 3012.5  | 3029.1          | 3036.8 | 3038.0 |
|                                | 3042.3                      | 3043.4          | 3047.7  | 3085.8          | 3093.3  | 3096.8          | 3097.3 | 3098.3 |
|                                | 3101.9                      | 3109.3          | 3146.5  | 3801.5          |         |                 |        |        |
| electronic state               | 2-A                         |                 |         |                 |         |                 |        |        |
| point group                    | C1                          |                 |         |                 |         |                 |        |        |
| rotational constants           | 1.66998                     |                 | 0.57221 |                 | 0.47281 |                 |        |        |
| ZPE                            | 0.267114 (Hartree/Particle) |                 |         |                 |         |                 |        |        |
| TS <sub>α</sub>                |                             |                 |         |                 |         |                 |        |        |
| optimized Cartesian coordinate | C                           | -1.259334000000 |         | -1.372567000000 |         | 0.192595000000  |        |        |
|                                | C                           | -0.395641000000 |         | -0.109155000000 |         | 0.008275000000  |        |        |
|                                | C                           | 0.948571000000  |         | -0.438897000000 |         | -0.597401000000 |        |        |
|                                | C                           | 1.869752000000  |         | -1.355874000000 |         | 0.169494000000  |        |        |
|                                | C                           | 3.284908000000  |         | -1.394643000000 |         | -0.406850000000 |        |        |
|                                | H                           | 1.563437000000  |         | 0.716089000000  |         | -0.562701000000 |        |        |
|                                | H                           | 3.734441000000  |         | -0.398185000000 |         | -0.407746000000 |        |        |
|                                | O                           | 2.119063000000  |         | 1.753092000000  |         | -0.255496000000 |        |        |
|                                | O                           | 2.201243000000  |         | 1.682508000000  |         | 1.127693000000  |        |        |
|                                | H                           | 3.098997000000  |         | 1.360481000000  |         | 1.284892000000  |        |        |
|                                | C                           | -1.146600000000 |         | 0.928267000000  |         | -0.834810000000 |        |        |

|                                |                             |                 |                 |                 |        |        |        |        |
|--------------------------------|-----------------------------|-----------------|-----------------|-----------------|--------|--------|--------|--------|
|                                | C                           | -2.513118000000 | 1.265624000000  | -0.237110000000 |        |        |        |        |
|                                | C                           | -3.363519000000 | 0.006337000000  | -0.062999000000 |        |        |        |        |
|                                | C                           | -2.628621000000 | -1.031873000000 | 0.786125000000  |        |        |        |        |
|                                | H                           | -0.534763000000 | 1.829455000000  | -0.929338000000 |        |        |        |        |
|                                | H                           | -0.214657000000 | 0.321544000000  | 1.004296000000  |        |        |        |        |
|                                | H                           | -1.392604000000 | -1.852354000000 | -0.786316000000 |        |        |        |        |
|                                | H                           | -0.743111000000 | -2.090936000000 | 0.835159000000  |        |        |        |        |
|                                | H                           | -2.369337000000 | 1.742520000000  | 0.739812000000  |        |        |        |        |
|                                | H                           | -3.030559000000 | 1.991263000000  | -0.870082000000 |        |        |        |        |
|                                | H                           | -4.326314000000 | 0.254588000000  | 0.391533000000  |        |        |        |        |
|                                | H                           | -3.577849000000 | -0.422519000000 | -1.049705000000 |        |        |        |        |
|                                | H                           | -2.488804000000 | -0.634199000000 | 1.798532000000  |        |        |        |        |
|                                | H                           | -3.228402000000 | -1.941139000000 | 0.882638000000  |        |        |        |        |
|                                | H                           | -1.285054000000 | 0.522555000000  | -1.846270000000 |        |        |        |        |
|                                | H                           | 0.913403000000  | -0.646323000000 | -1.672886000000 |        |        |        |        |
|                                | H                           | 1.450672000000  | -2.370840000000 | 0.164376000000  |        |        |        |        |
|                                | H                           | 1.889410000000  | -1.041901000000 | 1.219472000000  |        |        |        |        |
|                                | H                           | 3.929387000000  | -2.064351000000 | 0.165043000000  |        |        |        |        |
|                                | H                           | 3.270871000000  | -1.743853000000 | -1.442202000000 |        |        |        |        |
| frequencies                    | -1758.1                     | 39.1            | 42.3            | 79.6            | 104.0  | 126.2  | 139.7  | 157.4  |
|                                | 230.5                       | 234.3           | 293.4           | 306.6           | 344.8  | 380.7  | 409.0  | 440.4  |
|                                | 457.3                       | 468.7           | 541.7           | 620.6           | 766.9  | 797.4  | 805.6  | 858.0  |
|                                | 886.7                       | 902.5           | 914.8           | 935.1           | 950.1  | 990.3  | 1050.6 | 1056.3 |
|                                | 1059.0                      | 1073.7          | 1081.0          | 1093.8          | 1115.2 | 1131.7 | 1139.1 | 1169.6 |
|                                | 1183.8                      | 1219.6          | 1247.2          | 1289.0          | 1290.5 | 1299.3 | 1303.1 | 1337.0 |
|                                | 1348.8                      | 1365.1          | 1371.5          | 1386.7          | 1388.6 | 1394.1 | 1406.9 | 1416.5 |
|                                | 1419.7                      | 1471.1          | 1478.9          | 1482.8          | 1487.0 | 1489.5 | 1494.4 | 1501.3 |
|                                | 1508.5                      | 1511.8          | 3013.3          | 3025.5          | 3026.9 | 3034.4 | 3037.9 | 3044.7 |
|                                | 3048.5                      | 3059.4          | 3065.0          | 3080.4          | 3095.2 | 3097.1 | 3099.2 | 3100.9 |
|                                | 3103.6                      | 3127.3          | 3140.0          | 3806.3          |        |        |        |        |
| electronic state               | 2-A                         |                 |                 |                 |        |        |        |        |
| point group                    | C1                          |                 |                 |                 |        |        |        |        |
| rotational constants           | 1.61163                     | 0.58977         | 0.48739         |                 |        |        |        |        |
| ZPE                            | 0.267210 (Hartree/Particle) |                 |                 |                 |        |        |        |        |
|                                |                             |                 |                 |                 |        |        |        |        |
| TS <sub>c</sub> α'             |                             |                 |                 |                 |        |        |        |        |
| optimized Cartesian coordinate | C                           | -1.071221000000 | 0.172735000000  | 1.384310000000  |        |        |        |        |
|                                | C                           | -0.132520000000 | -0.296061000000 | 0.289023000000  |        |        |        |        |
|                                | C                           | 1.273060000000  | -0.590797000000 | 0.767846000000  |        |        |        |        |
|                                | C                           | 2.289947000000  | -0.882016000000 | -0.337866000000 |        |        |        |        |
|                                | C                           | 3.720962000000  | -0.897872000000 | 0.194248000000  |        |        |        |        |
|                                | H                           | 0.026106000000  | 0.765515000000  | -0.430945000000 |        |        |        |        |
|                                | O                           | 0.296257000000  | 1.826125000000  | -1.003255000000 |        |        |        |        |
|                                | O                           | 1.218599000000  | 2.428124000000  | -0.161008000000 |        |        |        |        |
|                                | H                           | 2.071334000000  | 2.185777000000  | -0.547102000000 |        |        |        |        |
|                                | H                           | 3.835013000000  | -1.651416000000 | 0.977844000000  |        |        |        |        |
|                                | C                           | -0.750195000000 | -1.300372000000 | -0.666121000000 |        |        |        |        |
|                                | C                           | -2.116679000000 | -0.841364000000 | -1.183935000000 |        |        |        |        |
|                                | C                           | -3.054329000000 | -0.475882000000 | -0.032676000000 |        |        |        |        |
|                                | C                           | -2.433060000000 | 0.613026000000  | 0.842688000000  |        |        |        |        |
|                                | H                           | -0.076157000000 | -1.495047000000 | -1.504157000000 |        |        |        |        |
|                                | H                           | -1.210896000000 | -0.661317000000 | 2.090650000000  |        |        |        |        |
|                                | H                           | -0.597811000000 | 0.984838000000  | 1.944716000000  |        |        |        |        |
|                                | H                           | -1.975912000000 | 0.037479000000  | -1.823916000000 |        |        |        |        |
|                                | H                           | -2.557653000000 | -1.623420000000 | -1.807177000000 |        |        |        |        |
|                                | H                           | -4.019521000000 | -0.143361000000 | -0.423207000000 |        |        |        |        |
|                                | H                           | -3.246153000000 | -1.368341000000 | 0.576328000000  |        |        |        |        |
|                                | H                           | -2.297762000000 | 1.522206000000  | 0.246803000000  |        |        |        |        |
|                                | H                           | -3.098197000000 | 0.866480000000  | 1.671950000000  |        |        |        |        |
|                                | H                           | -0.865018000000 | -2.253705000000 | -0.124751000000 |        |        |        |        |
|                                | H                           | 1.235487000000  | -1.445095000000 | 1.461681000000  |        |        |        |        |
|                                | H                           | 1.619187000000  | 0.263383000000  | 1.362134000000  |        |        |        |        |
|                                | H                           | 2.188697000000  | -0.128833000000 | -1.128963000000 |        |        |        |        |
|                                | H                           | 2.066119000000  | -1.843801000000 | -0.807554000000 |        |        |        |        |
|                                | H                           | 4.441021000000  | -1.123207000000 | -0.594522000000 |        |        |        |        |
|                                | H                           | 3.987482000000  | 0.069495000000  | 0.629193000000  |        |        |        |        |

|                                |                             |                 |         |                 |        |                 |        |        |
|--------------------------------|-----------------------------|-----------------|---------|-----------------|--------|-----------------|--------|--------|
| frequencies                    | -1681.0                     | 34.2            | 62.8    | 73.7            | 96.0   | 112.8           | 137.9  | 184.9  |
|                                | 205.6                       | 239.7           | 255.8   | 297.9           | 328.8  | 361.7           | 384.4  | 398.1  |
|                                | 449.8                       | 477.0           | 546.2   | 599.1           | 743.8  | 788.4           | 801.2  | 848.9  |
|                                | 860.6                       | 904.0           | 916.7   | 922.5           | 942.2  | 989.1           | 1051.0 | 1061.1 |
|                                | 1067.1                      | 1075.9          | 1087.8  | 1090.5          | 1117.7 | 1131.4          | 1169.0 | 1177.3 |
|                                | 1189.1                      | 1243.4          | 1249.7  | 1285.9          | 1293.9 | 1310.1          | 1324.7 | 1339.2 |
|                                | 1355.6                      | 1368.7          | 1384.6  | 1388.1          | 1399.0 | 1407.0          | 1410.5 | 1417.0 |
|                                | 1460.6                      | 1464.4          | 1472.5  | 1478.7          | 1490.8 | 1493.1          | 1500.6 | 1504.0 |
|                                | 1507.3                      | 1515.7          | 2989.0  | 2993.1          | 3001.8 | 3036.8          | 3044.3 | 3051.0 |
|                                | 3055.0                      | 3057.7          | 3060.8  | 3086.6          | 3090.7 | 3099.0          | 3102.1 | 3102.6 |
|                                | 3107.4                      | 3124.0          | 3135.9  | 3801.8          |        |                 |        |        |
| electronic state               | 2-A                         |                 |         |                 |        |                 |        |        |
| point group                    | C1                          |                 |         |                 |        |                 |        |        |
| rotational constants           | 1.45168                     | 0.66211         | 0.56522 |                 |        |                 |        |        |
| ZPE                            | 0.266970 (Hartree/Particle) |                 |         |                 |        |                 |        |        |
| TS <sub>c</sub> β'             |                             |                 |         |                 |        |                 |        |        |
| optimized Cartesian coordinate | C                           | 0.289289000000  |         | 0.161750000000  |        | 0.897053000000  |        |        |
|                                | C                           | 1.700383000000  |         | -0.149875000000 |        | 1.340540000000  |        |        |
|                                | C                           | 2.547207000000  |         | -0.722323000000 |        | 0.201746000000  |        |        |
|                                | H                           | 0.433903000000  |         | 1.118480000000  |        | 0.015382000000  |        |        |
|                                | O                           | 0.691385000000  |         | 1.977377000000  |        | -0.805383000000 |        |        |
|                                | O                           | 1.877415000000  |         | 2.537425000000  |        | -0.349286000000 |        |        |
|                                | H                           | 1.586197000000  |         | 3.329679000000  |        | 0.119979000000  |        |        |
|                                | C                           | 0.466441000000  |         | -1.491184000000 |        | -0.983014000000 |        |        |
|                                | C                           | -0.433455000000 |         | -0.923906000000 |        | 0.122951000000  |        |        |
|                                | H                           | 3.527509000000  |         | -1.020087000000 |        | 0.582124000000  |        |        |
|                                | H                           | 0.595981000000  |         | -0.721049000000 |        | -1.753165000000 |        |        |
|                                | H                           | -0.038081000000 |         | -2.338693000000 |        | -1.456535000000 |        |        |
|                                | H                           | 1.646077000000  |         | -0.883673000000 |        | 2.159828000000  |        |        |
|                                | H                           | 2.170103000000  |         | 0.746380000000  |        | 1.754821000000  |        |        |
|                                | H                           | -0.316373000000 |         | 0.646519000000  |        | 1.665133000000  |        |        |
|                                | H                           | -0.640226000000 |         | -1.737775000000 |        | 0.840337000000  |        |        |
|                                | H                           | 2.712938000000  |         | 0.063158000000  |        | -0.543025000000 |        |        |
|                                | C                           | 1.840174000000  |         | -1.907356000000 |        | -0.456346000000 |        |        |
|                                | H                           | 2.448716000000  |         | -2.305342000000 |        | -1.272449000000 |        |        |
|                                | H                           | 1.721475000000  |         | -2.715755000000 |        | 0.276217000000  |        |        |
|                                | C                           | -1.771790000000 |         | -0.449008000000 |        | -0.452485000000 |        |        |
|                                | H                           | -2.212898000000 |         | -1.277676000000 |        | -1.019182000000 |        |        |
|                                | H                           | -1.579700000000 |         | 0.352052000000  |        | -1.177675000000 |        |        |
|                                | C                           | -2.786890000000 |         | 0.035827000000  |        | 0.581827000000  |        |        |
|                                | H                           | -2.421777000000 |         | 0.946360000000  |        | 1.065796000000  |        |        |
|                                | H                           | -2.890563000000 |         | -0.718554000000 |        | 1.370301000000  |        |        |
|                                | C                           | -4.150717000000 |         | 0.317660000000  |        | -0.045121000000 |        |        |
|                                | H                           | -4.565325000000 |         | -0.586472000000 |        | -0.498203000000 |        |        |
|                                | H                           | -4.866063000000 |         | 0.681170000000  |        | 0.695109000000  |        |        |
|                                | H                           | -4.066151000000 |         | 1.073345000000  |        | -0.830349000000 |        |        |
| frequencies                    | -1746.5                     | 43.6            | 55.3    | 66.3            | 90.9   | 102.7           | 133.4  | 167.7  |
|                                | 205.5                       | 249.2           | 262.8   | 298.1           | 343.4  | 354.0           | 398.7  | 444.1  |
|                                | 472.5                       | 484.0           | 574.1   | 597.2           | 742.7  | 788.5           | 800.9  | 853.0  |
|                                | 867.1                       | 902.0           | 911.3   | 920.8           | 944.0  | 986.1           | 1042.3 | 1061.2 |
|                                | 1063.1                      | 1071.0          | 1083.4  | 1102.4          | 1117.1 | 1127.7          | 1159.5 | 1170.1 |
|                                | 1195.4                      | 1228.1          | 1248.0  | 1279.8          | 1292.2 | 1295.6          | 1322.7 | 1335.6 |
|                                | 1341.9                      | 1365.4          | 1368.6  | 1386.5          | 1390.0 | 1398.5          | 1406.0 | 1410.2 |
|                                | 1414.7                      | 1454.9          | 1465.4  | 1483.2          | 1492.1 | 1493.6          | 1498.4 | 1505.1 |
|                                | 1506.3                      | 1512.8          | 2961.7  | 2998.2          | 3032.3 | 3036.0          | 3046.2 | 3048.0 |
|                                | 3056.8                      | 3063.2          | 3068.2  | 3091.3          | 3092.5 | 3095.3          | 3098.4 | 3110.4 |
|                                | 3117.3                      | 3127.8          | 3134.4  | 3820.7          |        |                 |        |        |
| electronic state               | 2-A                         |                 |         |                 |        |                 |        |        |
| point group                    | C1                          |                 |         |                 |        |                 |        |        |
| rotational constants           | 1.29885                     | 0.65251         | 0.51427 |                 |        |                 |        |        |
| ZPE                            | 0.266882 (Hartree/Particle) |                 |         |                 |        |                 |        |        |
| TS <sub>c</sub> γ'             |                             |                 |         |                 |        |                 |        |        |

|                                      |                             |                 |                 |                 |        |        |        |        |
|--------------------------------------|-----------------------------|-----------------|-----------------|-----------------|--------|--------|--------|--------|
| optimized<br>Cartesian<br>coordinate | C                           | -1.712919000000 | 0.144231000000  | 1.095695000000  |        |        |        |        |
|                                      | C                           | -0.212414000000 | -0.034832000000 | 1.110821000000  |        |        |        |        |
|                                      | C                           | 0.329487000000  | -0.547351000000 | -0.230379000000 |        |        |        |        |
|                                      | H                           | -1.887344000000 | 1.093835000000  | 0.212266000000  |        |        |        |        |
|                                      | O                           | -1.895912000000 | 1.964546000000  | -0.637360000000 |        |        |        |        |
|                                      | O                           | -0.679257000000 | 2.612452000000  | -0.474060000000 |        |        |        |        |
|                                      | H                           | -0.904195000000 | 3.381608000000  | 0.065137000000  |        |        |        |        |
|                                      | C                           | -1.949200000000 | -1.518282000000 | -0.775150000000 |        |        |        |        |
|                                      | C                           | -2.508704000000 | -1.025486000000 | 0.561978000000  |        |        |        |        |
|                                      | H                           | -2.121792000000 | -0.751665000000 | -1.538066000000 |        |        |        |        |
|                                      | H                           | -2.482045000000 | -2.418038000000 | -1.092782000000 |        |        |        |        |
|                                      | H                           | 0.047151000000  | -0.761531000000 | 1.899411000000  |        |        |        |        |
|                                      | H                           | 0.268905000000  | 0.907929000000  | 1.382337000000  |        |        |        |        |
|                                      | H                           | -2.122711000000 | 0.596628000000  | 2.001094000000  |        |        |        |        |
|                                      | H                           | -2.452048000000 | -1.841187000000 | 1.299256000000  |        |        |        |        |
|                                      | H                           | -3.565326000000 | -0.760391000000 | 0.471188000000  |        |        |        |        |
|                                      | H                           | 0.158120000000  | 0.240829000000  | -0.975445000000 |        |        |        |        |
|                                      | C                           | -0.448209000000 | -1.791784000000 | -0.670591000000 |        |        |        |        |
|                                      | H                           | -0.272156000000 | -2.598096000000 | 0.055066000000  |        |        |        |        |
|                                      | H                           | -0.061728000000 | -2.142570000000 | -1.632398000000 |        |        |        |        |
|                                      | C                           | 1.831581000000  | -0.828672000000 | -0.172323000000 |        |        |        |        |
|                                      | H                           | 2.022189000000  | -1.633007000000 | 0.551433000000  |        |        |        |        |
|                                      | H                           | 2.149001000000  | -1.214215000000 | -1.148927000000 |        |        |        |        |
|                                      | C                           | 2.692138000000  | 0.385180000000  | 0.178774000000  |        |        |        |        |
| H                                    | 2.398575000000              | 1.227087000000  | -0.458008000000 |                 |        |        |        |        |
| H                                    | 2.497400000000              | 0.693966000000  | 1.210158000000  |                 |        |        |        |        |
| C                                    | 4.183274000000              | 0.100012000000  | 0.014191000000  |                 |        |        |        |        |
| H                                    | 4.417214000000              | -0.163038000000 | -1.020620000000 |                 |        |        |        |        |
| H                                    | 4.791088000000              | 0.965336000000  | 0.285915000000  |                 |        |        |        |        |
| H                                    | 4.490863000000              | -0.737560000000 | 0.646242000000  |                 |        |        |        |        |
| frequencies                          | -1761.1                     | 47.2            | 65.9            | 73.2            | 93.4   | 102.9  | 146.1  | 187.5  |
|                                      | 201.6                       | 251.0           | 265.5           | 310.8           | 313.9  | 356.4  | 397.6  | 437.7  |
|                                      | 466.6                       | 490.8           | 567.3           | 613.6           | 743.4  | 793.5  | 798.9  | 848.4  |
|                                      | 863.0                       | 897.4           | 914.5           | 918.7           | 943.8  | 987.9  | 1040.6 | 1060.7 |
|                                      | 1064.2                      | 1072.1          | 1080.6          | 1100.3          | 1130.2 | 1132.8 | 1158.4 | 1165.4 |
|                                      | 1204.7                      | 1230.0          | 1247.7          | 1283.0          | 1295.0 | 1302.2 | 1326.0 | 1335.0 |
|                                      | 1340.4                      | 1364.0          | 1375.1          | 1386.6          | 1390.8 | 1402.5 | 1405.8 | 1414.2 |
|                                      | 1416.6                      | 1461.0          | 1463.5          | 1473.3          | 1484.3 | 1492.1 | 1497.9 | 1500.4 |
|                                      | 1505.1                      | 1512.7          | 2979.1          | 3000.7          | 3020.3 | 3022.2 | 3045.1 | 3052.0 |
|                                      | 3055.6                      | 3057.6          | 3061.8          | 3086.6          | 3091.3 | 3094.0 | 3103.5 | 3106.2 |
|                                      | 3111.7                      | 3125.2          | 3132.7          | 3820.5          |        |        |        |        |
| electronic state                     | 2-A                         |                 |                 |                 |        |        |        |        |
| point group                          | C1                          |                 |                 |                 |        |        |        |        |
| rotational constants                 | 1.30198                     | 0.65990         | 0.50900         |                 |        |        |        |        |
| ZPE                                  | 0.266955 (Hartree/Particle) |                 |                 |                 |        |        |        |        |
| TS <sub>c</sub> δ'                   |                             |                 |                 |                 |        |        |        |        |
| optimized<br>Cartesian<br>coordinate | C                           | 2.049714000000  | 1.119500000000  | 0.162051000000  |        |        |        |        |
|                                      | C                           | 1.592891000000  | 0.446362000000  | 1.434606000000  |        |        |        |        |
|                                      | C                           | 0.352095000000  | -0.418204000000 | 1.198213000000  |        |        |        |        |
|                                      | C                           | -0.776409000000 | 0.355170000000  | 0.506744000000  |        |        |        |        |
|                                      | C                           | -1.996462000000 | -0.547951000000 | 0.310455000000  |        |        |        |        |
|                                      | C                           | -3.223437000000 | 0.142599000000  | -0.284369000000 |        |        |        |        |
|                                      | C                           | -4.449419000000 | -0.768134000000 | -0.285704000000 |        |        |        |        |
|                                      | H                           | 2.394588000000  | 0.118660000000  | -0.607834000000 |        |        |        |        |
|                                      | O                           | 2.660106000000  | -0.894099000000 | -1.221789000000 |        |        |        |        |
|                                      | O                           | 3.041811000000  | -1.796482000000 | -0.238351000000 |        |        |        |        |
|                                      | H                           | 4.006323000000  | -1.748751000000 | -0.251207000000 |        |        |        |        |
|                                      | H                           | -4.713861000000 | -1.067015000000 | 0.731918000000  |        |        |        |        |
|                                      | C                           | -0.269642000000 | 0.944103000000  | -0.814823000000 |        |        |        |        |
|                                      | C                           | 0.962794000000  | 1.831035000000  | -0.610801000000 |        |        |        |        |
|                                      | H                           | -0.004243000000 | -0.822422000000 | 2.150437000000  |        |        |        |        |
|                                      | H                           | -1.070922000000 | 1.190835000000  | 1.160360000000  |        |        |        |        |
|                                      | H                           | -0.012729000000 | 0.117568000000  | -1.489227000000 |        |        |        |        |
|                                      | H                           | -1.054424000000 | 1.528155000000  | -1.301518000000 |        |        |        |        |
|                                      | H                           | 1.359820000000  | 1.230043000000  | 2.172192000000  |        |        |        |        |
|                                      | H                           | 2.400011000000  | -0.155685000000 | 1.859983000000  |        |        |        |        |



|                                |                             |                 |                 |                 |        |        |        |        |
|--------------------------------|-----------------------------|-----------------|-----------------|-----------------|--------|--------|--------|--------|
|                                | H                           | 2.984921000000  | 1.676260000000  | 0.249405000000  |        |        |        |        |
|                                | H                           | 0.670428000000  | 2.726374000000  | -0.040635000000 |        |        |        |        |
|                                | H                           | 1.345215000000  | 2.186841000000  | -1.571119000000 |        |        |        |        |
|                                | H                           | 0.632497000000  | -1.273056000000 | 0.571681000000  |        |        |        |        |
|                                | H                           | -2.271500000000 | -0.976809000000 | 1.282010000000  |        |        |        |        |
|                                | H                           | -1.710965000000 | -1.394364000000 | -0.327886000000 |        |        |        |        |
|                                | H                           | -3.012698000000 | 0.462454000000  | -1.308750000000 |        |        |        |        |
|                                | H                           | -3.438950000000 | 1.052017000000  | 0.288386000000  |        |        |        |        |
|                                | H                           | -5.317292000000 | -0.274420000000 | -0.727323000000 |        |        |        |        |
|                                | H                           | -4.254302000000 | -1.678916000000 | -0.857990000000 |        |        |        |        |
| frequencies                    | -1754.9                     | 40.7            | 61.3            | 64.6            | 93.9   | 107.6  | 133.7  | 184.9  |
|                                | 219.8                       | 250.6           | 263.0           | 298.4           | 312.8  | 352.8  | 406.6  | 442.2  |
|                                | 458.7                       | 501.3           | 562.1           | 613.7           | 741.2  | 784.6  | 802.5  | 848.2  |
|                                | 860.0                       | 905.5           | 917.6           | 922.6           | 943.9  | 982.4  | 1037.6 | 1057.9 |
|                                | 1063.5                      | 1072.2          | 1084.3          | 1101.2          | 1125.7 | 1128.5 | 1159.4 | 1168.7 |
|                                | 1201.0                      | 1223.3          | 1246.5          | 1286.6          | 1290.5 | 1308.3 | 1323.6 | 1332.2 |
|                                | 1349.4                      | 1356.3          | 1371.5          | 1384.1          | 1388.9 | 1405.1 | 1406.6 | 1413.6 |
|                                | 1414.5                      | 1458.6          | 1464.5          | 1475.6          | 1483.2 | 1490.1 | 1496.3 | 1503.0 |
|                                | 1506.2                      | 1512.4          | 2996.4          | 2997.0          | 3001.7 | 3026.8 | 3045.9 | 3047.8 |
|                                | 3053.0                      | 3055.9          | 3063.0          | 3091.9          | 3092.5 | 3094.9 | 3098.4 | 3109.4 |
|                                | 3110.5                      | 3126.9          | 3132.5          | 3820.9          |        |        |        |        |
| electronic state               | 2-A                         |                 |                 |                 |        |        |        |        |
| point group                    | C1                          |                 |                 |                 |        |        |        |        |
| rotational constants           | 1.72090                     | 0.49229         | 0.46122         |                 |        |        |        |        |
| ZPE                            | 0.266850 (Hartree/Particle) |                 |                 |                 |        |        |        |        |
|                                |                             |                 |                 |                 |        |        |        |        |
| <i>i</i> PCH                   |                             |                 |                 |                 |        |        |        |        |
| optimized Cartesian coordinate | C                           | -0.246231000000 | 1.087398000000  | 0.423905000000  |        |        |        |        |
|                                | C                           | 0.273294000000  | -0.074340000000 | -0.433224000000 |        |        |        |        |
|                                | C                           | 1.775943000000  | -0.367791000000 | -0.248847000000 |        |        |        |        |
|                                | C                           | 2.170607000000  | -0.650655000000 | 1.203311000000  |        |        |        |        |
|                                | C                           | 2.647495000000  | 0.754952000000  | -0.816650000000 |        |        |        |        |
|                                | C                           | -0.598558000000 | -1.314731000000 | -0.200052000000 |        |        |        |        |
|                                | C                           | -2.072104000000 | -1.030506000000 | -0.502390000000 |        |        |        |        |
|                                | C                           | -2.586802000000 | 0.144775000000  | 0.331163000000  |        |        |        |        |
|                                | C                           | -1.717649000000 | 1.386303000000  | 0.121909000000  |        |        |        |        |
|                                | H                           | -0.236831000000 | -2.142916000000 | -0.818280000000 |        |        |        |        |
|                                | H                           | 0.139737000000  | 0.214895000000  | -1.486639000000 |        |        |        |        |
|                                | H                           | -0.151159000000 | 0.823691000000  | 1.484503000000  |        |        |        |        |
|                                | H                           | 0.356883000000  | 1.985463000000  | 0.262603000000  |        |        |        |        |
|                                | H                           | -2.180463000000 | -0.790798000000 | -1.567224000000 |        |        |        |        |
|                                | H                           | -2.676043000000 | -1.922659000000 | -0.315458000000 |        |        |        |        |
|                                | H                           | -3.628840000000 | 0.362198000000  | 0.081256000000  |        |        |        |        |
|                                | H                           | -2.565001000000 | -0.132203000000 | 1.392405000000  |        |        |        |        |
|                                | H                           | -1.810529000000 | 1.719739000000  | -0.918909000000 |        |        |        |        |
|                                | H                           | -2.072115000000 | 2.207903000000  | 0.750381000000  |        |        |        |        |
|                                | H                           | -0.508695000000 | -1.634237000000 | 0.845367000000  |        |        |        |        |
|                                | H                           | 1.984823000000  | -1.273021000000 | -0.833284000000 |        |        |        |        |
|                                | H                           | 1.566513000000  | -1.443466000000 | 1.649404000000  |        |        |        |        |
|                                | H                           | 2.063382000000  | 0.246153000000  | 1.819670000000  |        |        |        |        |
|                                | H                           | 2.386341000000  | 0.974431000000  | -1.855154000000 |        |        |        |        |
|                                | H                           | 2.534912000000  | 1.675598000000  | -0.237663000000 |        |        |        |        |
|                                | H                           | 3.704135000000  | 0.477717000000  | -0.785317000000 |        |        |        |        |
|                                | H                           | 3.216980000000  | -0.960914000000 | 1.257594000000  |        |        |        |        |
| frequencies                    | 38.7                        | 121.2           | 210.7           | 228.2           | 246.2  | 255.9  | 282.2  | 312.4  |
|                                | 369.2                       | 421.4           | 446.9           | 470.3           | 504.8  | 577.4  | 783.4  | 800.9  |
|                                | 848.0                       | 868.3           | 904.5           | 907.7           | 928.9  | 938.1  | 972.1  | 974.3  |
|                                | 1041.3                      | 1054.6          | 1060.7          | 1087.0          | 1100.5 | 1119.2 | 1152.6 | 1185.0 |
|                                | 1212.3                      | 1225.3          | 1270.5          | 1295.4          | 1301.6 | 1325.0 | 1328.1 | 1354.8 |
|                                | 1366.9                      | 1371.5          | 1386.7          | 1387.7          | 1400.3 | 1405.4 | 1411.3 | 1425.2 |
|                                | 1483.2                      | 1487.1          | 1490.0          | 1491.7          | 1495.7 | 1503.0 | 1509.3 | 1514.0 |
|                                | 1515.9                      | 3002.0          | 3030.8          | 3036.6          | 3037.4 | 3041.4 | 3043.3 | 3046.1 |
|                                | 3052.8                      | 3059.5          | 3084.8          | 3093.5          | 3094.6 | 3096.6 | 3100.6 | 3122.9 |
|                                | 3126.2                      | 3127.0          | 3135.6          |                 |        |        |        |        |
| electronic state               | 1-A                         |                 |                 |                 |        |        |        |        |
| point group                    | C1                          |                 |                 |                 |        |        |        |        |

|                                |                             |                 |                 |                 |        |        |        |        |  |
|--------------------------------|-----------------------------|-----------------|-----------------|-----------------|--------|--------|--------|--------|--|
| rotational constants           | 2.84446                     | 1.01329         | 0.90793         |                 |        |        |        |        |  |
| ZPE                            | 0.256299 (Hartree/Particle) |                 |                 |                 |        |        |        |        |  |
| <i>i</i> P1                    |                             |                 |                 |                 |        |        |        |        |  |
| optimized Cartesian coordinate | C                           | -0.197246000000 | 1.101857000000  | 0.396748000000  |        |        |        |        |  |
|                                | C                           | 0.307966000000  | -0.075040000000 | -0.445346000000 |        |        |        |        |  |
|                                | C                           | 1.813653000000  | -0.389078000000 | -0.224877000000 |        |        |        |        |  |
|                                | C                           | 2.127508000000  | -0.797393000000 | 1.177761000000  |        |        |        |        |  |
|                                | C                           | 2.705593000000  | 0.776959000000  | -0.662016000000 |        |        |        |        |  |
|                                | H                           | 3.754950000000  | 0.475269000000  | -0.670964000000 |        |        |        |        |  |
|                                | C                           | -0.569039000000 | -1.307498000000 | -0.200940000000 |        |        |        |        |  |
|                                | C                           | -2.043470000000 | -1.018962000000 | -0.491426000000 |        |        |        |        |  |
|                                | C                           | -2.542858000000 | 0.159082000000  | 0.347213000000  |        |        |        |        |  |
|                                | C                           | -1.673992000000 | 1.396967000000  | 0.118221000000  |        |        |        |        |  |
|                                | H                           | -0.214805000000 | -2.142530000000 | -0.814848000000 |        |        |        |        |  |
|                                | H                           | 0.201826000000  | 0.201673000000  | -1.504976000000 |        |        |        |        |  |
|                                | H                           | -0.069781000000 | 0.856523000000  | 1.459066000000  |        |        |        |        |  |
|                                | H                           | 0.399677000000  | 1.996864000000  | 0.201234000000  |        |        |        |        |  |
|                                | H                           | -2.162565000000 | -0.779896000000 | -1.555312000000 |        |        |        |        |  |
|                                | H                           | -2.648201000000 | -1.908943000000 | -0.296939000000 |        |        |        |        |  |
|                                | H                           | -3.588120000000 | 0.378742000000  | 0.113346000000  |        |        |        |        |  |
|                                | H                           | -2.504062000000 | -0.115177000000 | 1.408588000000  |        |        |        |        |  |
|                                | H                           | -1.784063000000 | 1.724332000000  | -0.923036000000 |        |        |        |        |  |
|                                | H                           | -2.016494000000 | 2.223649000000  | 0.746692000000  |        |        |        |        |  |
|                                | H                           | -0.467558000000 | -1.615072000000 | 0.847304000000  |        |        |        |        |  |
|                                | H                           | 2.029362000000  | -1.243824000000 | -0.881210000000 |        |        |        |        |  |
|                                | H                           | 1.881850000000  | -1.784349000000 | 1.546127000000  |        |        |        |        |  |
|                                | H                           | 2.439461000000  | 1.122624000000  | -1.664236000000 |        |        |        |        |  |
|                                | H                           | 2.611763000000  | 1.622161000000  | 0.024410000000  |        |        |        |        |  |
|                                | H                           | 2.568069000000  | -0.093418000000 | 1.872733000000  |        |        |        |        |  |
| frequencies                    | 44.2                        | 75.8            | 120.1           | 208.5           | 234.5  | 254.4  | 275.8  | 315.7  |  |
|                                | 367.0                       | 416.4           | 439.0           | 446.5           | 469.6  | 511.5  | 616.4  | 785.2  |  |
|                                | 800.3                       | 852.2           | 872.1           | 901.7           | 906.6  | 926.6  | 938.6  | 970.5  |  |
|                                | 1026.4                      | 1044.9          | 1058.6          | 1075.0          | 1095.2 | 1118.2 | 1149.3 | 1164.8 |  |
|                                | 1195.5                      | 1216.1          | 1252.8          | 1292.8          | 1299.7 | 1303.5 | 1321.4 | 1342.5 |  |
|                                | 1368.0                      | 1371.5          | 1386.6          | 1387.9          | 1395.4 | 1407.0 | 1410.3 | 1469.8 |  |
|                                | 1484.1                      | 1488.2          | 1490.8          | 1495.4          | 1498.8 | 1509.7 | 1511.5 | 3005.0 |  |
|                                | 3014.8                      | 3033.8          | 3036.9          | 3039.6          | 3041.6 | 3045.4 | 3057.8 | 3082.6 |  |
|                                | 3093.3                      | 3095.0          | 3097.6          | 3100.7          | 3130.1 | 3134.7 | 3165.4 | 3270.2 |  |
| electronic state               | 2-A                         |                 |                 |                 |        |        |        |        |  |
| point group                    | C1                          |                 |                 |                 |        |        |        |        |  |
| rotational constants           | 2.88844                     | 1.04776         | 0.91857         |                 |        |        |        |        |  |
| ZPE                            | 0.241089 (Hartree/Particle) |                 |                 |                 |        |        |        |        |  |
| <i>i</i> P2                    |                             |                 |                 |                 |        |        |        |        |  |
| optimized Cartesian coordinate | C                           | -0.291047000000 | 1.108289000000  | 0.502970000000  |        |        |        |        |  |
|                                | C                           | 0.299091000000  | 0.024417000000  | -0.428785000000 |        |        |        |        |  |
|                                | C                           | 1.773361000000  | -0.152031000000 | -0.199451000000 |        |        |        |        |  |
|                                | C                           | 2.259526000000  | -1.080965000000 | 0.868110000000  |        |        |        |        |  |
|                                | C                           | 2.679623000000  | 0.962760000000  | -0.615166000000 |        |        |        |        |  |
|                                | H                           | 3.349352000000  | -1.153620000000 | 0.854937000000  |        |        |        |        |  |
|                                | H                           | 3.678445000000  | 0.591794000000  | -0.864003000000 |        |        |        |        |  |
|                                | C                           | -0.510956000000 | -1.270074000000 | -0.286323000000 |        |        |        |        |  |
|                                | C                           | -1.993881000000 | -1.037797000000 | -0.583009000000 |        |        |        |        |  |
|                                | C                           | -2.574312000000 | 0.039356000000  | 0.335924000000  |        |        |        |        |  |
|                                | C                           | -1.778031000000 | 1.340935000000  | 0.225165000000  |        |        |        |        |  |
|                                | H                           | -0.099627000000 | -2.037924000000 | -0.949086000000 |        |        |        |        |  |
|                                | H                           | 0.163870000000  | 0.388494000000  | -1.458989000000 |        |        |        |        |  |
|                                | H                           | -0.158267000000 | 0.785186000000  | 1.543762000000  |        |        |        |        |  |
|                                | H                           | 0.266439000000  | 2.042094000000  | 0.383718000000  |        |        |        |        |  |
|                                | H                           | -2.108757000000 | -0.721819000000 | -1.627058000000 |        |        |        |        |  |
|                                | H                           | -2.551102000000 | -1.971967000000 | -0.471927000000 |        |        |        |        |  |
|                                | H                           | -3.626897000000 | 0.216546000000  | 0.099026000000  |        |        |        |        |  |
|                                | H                           | -2.536817000000 | -0.317154000000 | 1.372701000000  |        |        |        |        |  |
|                                | H                           | -1.891663000000 | 1.745777000000  | -0.787973000000 |        |        |        |        |  |

|                                |                             |                 |                 |                 |        |        |        |        |
|--------------------------------|-----------------------------|-----------------|-----------------|-----------------|--------|--------|--------|--------|
|                                | H                           | -2.177528000000 | 2.091808000000  | 0.912584000000  |        |        |        |        |
|                                | H                           | -0.412017000000 | -1.646101000000 | 0.739537000000  |        |        |        |        |
|                                | H                           | 1.852844000000  | -2.089529000000 | 0.756550000000  |        |        |        |        |
|                                | H                           | 1.972159000000  | -0.733993000000 | 1.873724000000  |        |        |        |        |
|                                | H                           | 2.285890000000  | 1.497774000000  | -1.483409000000 |        |        |        |        |
|                                | H                           | 2.813426000000  | 1.703296000000  | 0.189290000000  |        |        |        |        |
| frequencies                    | 57.1                        | 102.0           | 136.5           | 152.9           | 170.3  | 242.1  | 259.8  | 309.6  |
|                                | 365.6                       | 395.8           | 437.2           | 451.8           | 494.7  | 544.0  | 773.9  | 798.3  |
|                                | 837.0                       | 864.3           | 900.0           | 906.9           | 934.3  | 938.8  | 980.3  | 989.7  |
|                                | 1046.8                      | 1048.9          | 1051.0          | 1070.9          | 1093.9 | 1117.9 | 1147.0 | 1197.8 |
|                                | 1231.4                      | 1283.0          | 1288.6          | 1293.0          | 1317.3 | 1325.6 | 1344.1 | 1358.7 |
|                                | 1367.7                      | 1384.4          | 1385.3          | 1401.9          | 1410.6 | 1414.8 | 1476.2 | 1478.0 |
|                                | 1482.5                      | 1487.1          | 1488.4          | 1495.0          | 1497.4 | 1497.9 | 1509.6 | 2981.1 |
|                                | 2984.8                      | 2996.6          | 3032.8          | 3036.9          | 3039.8 | 3041.8 | 3045.5 | 3071.0 |
|                                | 3082.3                      | 3089.1          | 3091.1          | 3093.8          | 3095.0 | 3100.0 | 3118.9 | 3127.4 |
| electronic state               | 2-A                         |                 |                 |                 |        |        |        |        |
| point group                    | C1                          |                 |                 |                 |        |        |        |        |
| rotational constants           | 2.86462                     | 1.03742         | 0.88588         |                 |        |        |        |        |
| ZPE                            | 0.241631 (Hartree/Particle) |                 |                 |                 |        |        |        |        |
| <i>iP3</i>                     |                             |                 |                 |                 |        |        |        |        |
| optimized Cartesian coordinate | C                           | 0.587075000000  | -1.338954000000 | -0.171750000000 |        |        |        |        |
|                                | C                           | -0.275098000000 | -0.111995000000 | -0.180661000000 |        |        |        |        |
|                                | C                           | -1.759895000000 | -0.291489000000 | -0.340079000000 |        |        |        |        |
|                                | C                           | -2.484051000000 | 0.977199000000  | -0.798797000000 |        |        |        |        |
|                                | C                           | -2.389098000000 | -0.818010000000 | 0.965012000000  |        |        |        |        |
|                                | H                           | -1.998141000000 | 1.414373000000  | -1.674461000000 |        |        |        |        |
|                                | H                           | -3.462266000000 | -0.985338000000 | 0.839591000000  |        |        |        |        |
|                                | H                           | -1.910189000000 | -1.059915000000 | -1.108849000000 |        |        |        |        |
|                                | H                           | -2.504665000000 | 1.731132000000  | -0.007586000000 |        |        |        |        |
|                                | C                           | 0.282584000000  | 1.084266000000  | 0.531798000000  |        |        |        |        |
|                                | C                           | 1.737399000000  | 1.365102000000  | 0.128273000000  |        |        |        |        |
|                                | C                           | 2.602023000000  | 0.111929000000  | 0.266091000000  |        |        |        |        |
|                                | C                           | 2.035868000000  | -1.033227000000 | -0.574034000000 |        |        |        |        |
|                                | H                           | -0.330670000000 | 1.970583000000  | 0.352612000000  |        |        |        |        |
|                                | H                           | 0.600328000000  | -1.771463000000 | 0.845158000000  |        |        |        |        |
|                                | H                           | 0.159850000000  | -2.106980000000 | -0.824510000000 |        |        |        |        |
|                                | H                           | 1.756562000000  | 1.700043000000  | -0.914986000000 |        |        |        |        |
|                                | H                           | 2.141842000000  | 2.178571000000  | 0.736654000000  |        |        |        |        |
|                                | H                           | 3.632036000000  | 0.327593000000  | -0.030490000000 |        |        |        |        |
|                                | H                           | 2.630410000000  | -0.193242000000 | 1.319856000000  |        |        |        |        |
|                                | H                           | 2.059772000000  | -0.748264000000 | -1.631822000000 |        |        |        |        |
|                                | H                           | 2.651953000000  | -1.929957000000 | -0.465848000000 |        |        |        |        |
|                                | H                           | 0.257255000000  | 0.905777000000  | 1.622265000000  |        |        |        |        |
|                                | H                           | -3.520375000000 | 0.749175000000  | -1.059017000000 |        |        |        |        |
|                                | H                           | -1.931675000000 | -1.760222000000 | 1.275329000000  |        |        |        |        |
|                                | H                           | -2.252881000000 | -0.090800000000 | 1.770982000000  |        |        |        |        |
| frequencies                    | 26.9                        | 68.6            | 186.8           | 211.9           | 227.4  | 269.1  | 273.9  | 295.8  |
|                                | 354.1                       | 406.1           | 441.5           | 447.0           | 492.3  | 585.2  | 731.4  | 790.3  |
|                                | 849.2                       | 856.6           | 886.8           | 918.1           | 926.5  | 931.4  | 965.4  | 978.3  |
|                                | 1048.0                      | 1062.8          | 1089.9          | 1095.3          | 1100.8 | 1121.9 | 1153.7 | 1174.1 |
|                                | 1215.4                      | 1260.2          | 1271.5          | 1290.6          | 1318.5 | 1328.5 | 1353.6 | 1360.5 |
|                                | 1372.6                      | 1384.2          | 1388.4          | 1397.6          | 1410.4 | 1415.1 | 1468.2 | 1475.7 |
|                                | 1487.4                      | 1490.3          | 1490.9          | 1496.4          | 1503.7 | 1509.4 | 1515.6 | 2944.5 |
|                                | 2949.2                      | 3030.7          | 3036.1          | 3048.4          | 3048.8 | 3050.6 | 3055.1 | 3076.2 |
|                                | 3095.5                      | 3097.6          | 3101.5          | 3102.7          | 3119.1 | 3128.0 | 3129.8 | 3130.9 |
| electronic state               | 2-A                         |                 |                 |                 |        |        |        |        |
| point group                    | C1                          |                 |                 |                 |        |        |        |        |
| rotational constants           | 2.85092                     | 1.03020         | 0.89088         |                 |        |        |        |        |
| ZPE                            | 0.242208 (Hartree/Particle) |                 |                 |                 |        |        |        |        |
| <i>iP4</i>                     |                             |                 |                 |                 |        |        |        |        |
| optimized Cartesian            | C                           | 0.585857000000  | -1.241934000000 | -0.374052000000 |        |        |        |        |
|                                | C                           | 2.069559000000  | -1.085458000000 | -0.444769000000 |        |        |        |        |

|                                |                             |                 |                 |                 |        |        |        |        |
|--------------------------------|-----------------------------|-----------------|-----------------|-----------------|--------|--------|--------|--------|
| coordinate                     | C                           | 2.552529000000  | 0.086298000000  | 0.421005000000  |        |        |        |        |
|                                | C                           | 0.251822000000  | 1.117811000000  | 0.360370000000  |        |        |        |        |
|                                | C                           | -0.287020000000 | -0.032818000000 | -0.509072000000 |        |        |        |        |
|                                | H                           | 3.618799000000  | 0.261256000000  | 0.254992000000  |        |        |        |        |
|                                | H                           | 0.102427000000  | 0.872685000000  | 1.417932000000  |        |        |        |        |
|                                | H                           | -0.307150000000 | 2.034842000000  | 0.155295000000  |        |        |        |        |
|                                | H                           | 2.368376000000  | -0.884730000000 | -1.488364000000 |        |        |        |        |
|                                | H                           | 2.570548000000  | -2.013063000000 | -0.156919000000 |        |        |        |        |
|                                | H                           | 0.147131000000  | -2.219539000000 | -0.548463000000 |        |        |        |        |
|                                | H                           | -0.214241000000 | 0.315375000000  | -1.557446000000 |        |        |        |        |
|                                | H                           | 2.426031000000  | -0.173982000000 | 1.477852000000  |        |        |        |        |
|                                | C                           | -1.772193000000 | -0.367262000000 | -0.261347000000 |        |        |        |        |
|                                | H                           | -2.008263000000 | -1.202887000000 | -0.932464000000 |        |        |        |        |
|                                | C                           | -2.693248000000 | 0.796700000000  | -0.629164000000 |        |        |        |        |
|                                | H                           | -3.740991000000 | 0.491395000000  | -0.574200000000 |        |        |        |        |
|                                | H                           | -2.561501000000 | 1.636574000000  | 0.058368000000  |        |        |        |        |
|                                | H                           | -2.498024000000 | 1.155201000000  | -1.643449000000 |        |        |        |        |
|                                | C                           | -2.043798000000 | -0.830867000000 | 1.171991000000  |        |        |        |        |
|                                | H                           | -1.934885000000 | -0.004419000000 | 1.879411000000  |        |        |        |        |
|                                | H                           | -3.065497000000 | -1.207282000000 | 1.264348000000  |        |        |        |        |
| H                              | -1.357904000000             | -1.626146000000 | 1.473970000000  |                 |        |        |        |        |
| C                              | 1.745283000000              | 1.348714000000  | 0.117728000000  |                 |        |        |        |        |
| H                              | 2.099395000000              | 2.180745000000  | 0.732289000000  |                 |        |        |        |        |
| H                              | 1.902997000000              | 1.636885000000  | -0.929296000000 |                 |        |        |        |        |
| frequencies                    | 58.2                        | 98.5            | 192.5           | 213.1           | 235.1  | 258.3  | 275.0  | 316.0  |
|                                | 340.1                       | 401.9           | 419.4           | 459.2           | 481.0  | 571.2  | 609.4  | 776.6  |
|                                | 829.9                       | 853.7           | 887.3           | 909.3           | 932.2  | 934.0  | 969.0  | 972.3  |
|                                | 1035.0                      | 1046.1          | 1065.0          | 1083.6          | 1107.9 | 1127.1 | 1143.4 | 1178.5 |
|                                | 1213.4                      | 1227.3          | 1261.5          | 1272.0          | 1310.2 | 1320.9 | 1348.7 | 1362.1 |
|                                | 1364.2                      | 1375.5          | 1382.9          | 1387.1          | 1403.6 | 1414.3 | 1422.1 | 1472.2 |
|                                | 1485.8                      | 1488.4          | 1491.3          | 1500.7          | 1501.9 | 1510.0 | 1516.2 | 2923.0 |
|                                | 2958.2                      | 3032.0          | 3036.8          | 3050.1          | 3051.6 | 3052.0 | 3058.6 | 3092.5 |
|                                | 3095.5                      | 3100.2          | 3104.0          | 3123.8          | 3125.3 | 3127.7 | 3130.8 | 3173.0 |
| electronic state               | 2-A                         |                 |                 |                 |        |        |        |        |
| point group                    | C1                          |                 |                 |                 |        |        |        |        |
| rotational constants           | 2.89589                     | 1.03611         | 0.91531         |                 |        |        |        |        |
| ZPE                            | 0.241593 (Hartree/Particle) |                 |                 |                 |        |        |        |        |
| <i>i</i> P5                    |                             |                 |                 |                 |        |        |        |        |
| optimized Cartesian coordinate | C                           | -1.913008000000 | 1.276487000000  | -0.197316000000 |        |        |        |        |
|                                | C                           | -0.463959000000 | 1.301434000000  | 0.160166000000  |        |        |        |        |
|                                | C                           | 0.273769000000  | 0.000635000000  | -0.219841000000 |        |        |        |        |
|                                | C                           | -1.971552000000 | -1.205990000000 | -0.273948000000 |        |        |        |        |
|                                | C                           | -2.713706000000 | 0.067669000000  | 0.150270000000  |        |        |        |        |
|                                | H                           | -1.947884000000 | -1.257004000000 | -1.368162000000 |        |        |        |        |
|                                | H                           | -2.507466000000 | -2.091109000000 | 0.079430000000  |        |        |        |        |
|                                | H                           | -0.350244000000 | 1.436612000000  | 1.252446000000  |        |        |        |        |
|                                | H                           | 0.016348000000  | 2.163587000000  | -0.306037000000 |        |        |        |        |
|                                | H                           | -2.411674000000 | 2.199563000000  | -0.465822000000 |        |        |        |        |
|                                | H                           | -2.871148000000 | 0.024595000000  | 1.241900000000  |        |        |        |        |
|                                | H                           | -3.706249000000 | 0.110340000000  | -0.304177000000 |        |        |        |        |
|                                | H                           | 0.328419000000  | -0.041936000000 | -1.318248000000 |        |        |        |        |
|                                | C                           | 1.716720000000  | -0.014721000000 | 0.321339000000  |        |        |        |        |
|                                | H                           | 1.654820000000  | -0.009014000000 | 1.418471000000  |        |        |        |        |
|                                | C                           | 2.475519000000  | -1.274093000000 | -0.108165000000 |        |        |        |        |
|                                | H                           | 2.470175000000  | -1.368730000000 | -1.199315000000 |        |        |        |        |
|                                | H                           | 3.517654000000  | -1.221723000000 | 0.215424000000  |        |        |        |        |
|                                | H                           | 2.047618000000  | -2.184558000000 | 0.312628000000  |        |        |        |        |
|                                | C                           | 2.504267000000  | 1.223793000000  | -0.117258000000 |        |        |        |        |
| H                              | 2.490385000000              | 1.318219000000  | -1.208485000000 |                 |        |        |        |        |
| H                              | 2.102060000000              | 2.144492000000  | 0.307234000000  |                 |        |        |        |        |
| H                              | 3.547663000000              | 1.145257000000  | 0.196627000000  |                 |        |        |        |        |
| C                              | -0.537452000000             | -1.211865000000 | 0.257901000000  |                 |        |        |        |        |
| H                              | -0.556131000000             | -1.210650000000 | 1.357141000000  |                 |        |        |        |        |
| H                              | -0.047929000000             | -2.138046000000 | -0.049943000000 |                 |        |        |        |        |
| frequencies                    | 54.7                        | 109.1           | 159.6           | 183.0           | 230.0  | 263.3  | 273.3  | 340.2  |
|                                | 361.3                       | 386.5           | 411.5           | 445.9           | 472.1  | 497.8  | 611.4  | 785.8  |

|                                |                             |                 |         |                 |        |                 |        |        |  |
|--------------------------------|-----------------------------|-----------------|---------|-----------------|--------|-----------------|--------|--------|--|
|                                | 853.4                       | 860.1           | 876.7   | 906.2           | 930.0  | 935.1           | 964.1  | 977.4  |  |
|                                | 994.1                       | 1067.6          | 1087.6  | 1108.9          | 1111.1 | 1138.1          | 1145.3 | 1168.2 |  |
|                                | 1195.0                      | 1233.7          | 1255.4  | 1277.0          | 1307.8 | 1331.1          | 1348.6 | 1354.6 |  |
|                                | 1365.6                      | 1369.4          | 1373.4  | 1402.0          | 1404.0 | 1407.2          | 1421.8 | 1469.7 |  |
|                                | 1474.4                      | 1487.7          | 1490.6  | 1497.1          | 1505.6 | 1508.1          | 1526.9 | 2936.2 |  |
|                                | 2960.5                      | 3004.2          | 3020.1  | 3029.0          | 3049.1 | 3051.3          | 3053.2 | 3098.5 |  |
|                                | 3099.4                      | 3107.6          | 3109.8  | 3116.3          | 3122.8 | 3144.0          | 3146.0 | 3200.8 |  |
| electronic state               | 2-A                         |                 |         |                 |        |                 |        |        |  |
| point group                    | C1                          |                 |         |                 |        |                 |        |        |  |
| rotational constants           | 2.95086                     | 1.05995         | 0.82878 |                 |        |                 |        |        |  |
| ZPE                            | 0.241406 (Hartree/Particle) |                 |         |                 |        |                 |        |        |  |
| <i>i</i> P6                    |                             |                 |         |                 |        |                 |        |        |  |
| optimized Cartesian coordinate | C                           | -2.600160000000 |         | 0.178889000000  |        | 0.244418000000  |        |        |  |
|                                | C                           | -2.117698000000 |         | -1.058589000000 |        | -0.437830000000 |        |        |  |
|                                | C                           | -0.635386000000 |         | -1.323430000000 |        | -0.131965000000 |        |        |  |
|                                | C                           | 0.221750000000  |         | -0.081189000000 |        | -0.403565000000 |        |        |  |
|                                | C                           | 1.730365000000  |         | -0.367767000000 |        | -0.261027000000 |        |        |  |
|                                | C                           | 2.164810000000  |         | -0.642906000000 |        | 1.181097000000  |        |        |  |
|                                | C                           | 2.581028000000  |         | 0.755635000000  |        | -0.858313000000 |        |        |  |
|                                | H                           | 3.215197000000  |         | -0.942803000000 |        | 1.209285000000  |        |        |  |
|                                | H                           | 3.638741000000  |         | 0.480857000000  |        | -0.857889000000 |        |        |  |
|                                | C                           | -0.275103000000 |         | 1.080499000000  |        | 0.465969000000  |        |        |  |
|                                | C                           | -1.748371000000 |         | 1.402719000000  |        | 0.168927000000  |        |        |  |
|                                | H                           | -0.274644000000 |         | -2.165467000000 |        | -0.731487000000 |        |        |  |
|                                | H                           | 0.054959000000  |         | 0.201256000000  |        | -1.454578000000 |        |        |  |
|                                | H                           | -0.182394000000 |         | 0.804486000000  |        | 1.522303000000  |        |        |  |
|                                | H                           | 0.334483000000  |         | 1.974497000000  |        | 0.307562000000  |        |        |  |
|                                | H                           | -2.225691000000 |         | -0.944752000000 |        | -1.530413000000 |        |        |  |
|                                | H                           | -2.728235000000 |         | -1.920525000000 |        | -0.158003000000 |        |        |  |
|                                | H                           | -3.639671000000 |         | 0.262954000000  |        | 0.536923000000  |        |        |  |
|                                | H                           | -1.805359000000 |         | 1.832350000000  |        | -0.846221000000 |        |        |  |
|                                | H                           | -2.116400000000 |         | 2.174614000000  |        | 0.849186000000  |        |        |  |
|                                | H                           | -0.540778000000 |         | -1.609303000000 |        | 0.921372000000  |        |        |  |
|                                | H                           | 1.926318000000  |         | -1.274513000000 |        | -0.847417000000 |        |        |  |
|                                | H                           | 1.579613000000  |         | -1.440184000000 |        | 1.644072000000  |        |        |  |
|                                | H                           | 2.064137000000  |         | 0.254482000000  |        | 1.797765000000  |        |        |  |
|                                | H                           | 2.288302000000  |         | 0.970789000000  |        | -1.889292000000 |        |        |  |
|                                | H                           | 2.484016000000  |         | 1.678095000000  |        | -0.279440000000 |        |        |  |
| frequencies                    | 39.6                        | 113.3           | 200.8   | 213.2           | 235.6  | 239.7           | 255.5  | 295.6  |  |
|                                | 340.2                       | 375.6           | 431.9   | 452.1           | 473.5  | 549.0           | 638.2  | 786.9  |  |
|                                | 799.3                       | 853.5           | 897.8   | 914.9           | 927.2  | 948.2           | 966.3  | 971.4  |  |
|                                | 1035.1                      | 1041.1          | 1055.0  | 1086.3          | 1110.3 | 1129.2          | 1140.9 | 1174.4 |  |
|                                | 1212.6                      | 1232.6          | 1245.9  | 1294.4          | 1310.2 | 1320.6          | 1344.5 | 1351.7 |  |
|                                | 1360.4                      | 1378.3          | 1395.7  | 1401.7          | 1404.0 | 1411.1          | 1424.5 | 1470.9 |  |
|                                | 1478.4                      | 1484.0          | 1490.3  | 1497.8          | 1504.0 | 1512.9          | 1515.4 | 2958.3 |  |
|                                | 2960.7                      | 2998.2          | 3031.9  | 3046.5          | 3051.7 | 3053.4          | 3060.3 | 3091.5 |  |
|                                | 3095.8                      | 3096.3          | 3101.8  | 3123.7          | 3126.6 | 3127.6          | 3136.2 | 3200.6 |  |
| electronic state               | 2-A                         |                 |         |                 |        |                 |        |        |  |
| point group                    | C1                          |                 |         |                 |        |                 |        |        |  |
| rotational constants           | 2.86041                     | 1.03749         | 0.91984 |                 |        |                 |        |        |  |
| ZPE                            | 0.241474 (Hartree/Particle) |                 |         |                 |        |                 |        |        |  |
| <i>TS<sub>dβ</sub></i>         |                             |                 |         |                 |        |                 |        |        |  |
| optimized Cartesian coordinate | C                           | 0.360877000000  |         | 0.635138000000  |        | 0.598773000000  |        |        |  |
|                                | C                           | 0.545728000000  |         | -0.850955000000 |        | 0.263370000000  |        |        |  |
|                                | C                           | -0.772387000000 |         | -1.576869000000 |        | -0.064767000000 |        |        |  |
|                                | C                           | -1.605910000000 |         | -0.878405000000 |        | -1.114008000000 |        |        |  |
|                                | C                           | -1.610131000000 |         | -1.854317000000 |        | 1.189432000000  |        |        |  |
|                                | H                           | -2.253274000000 |         | 0.127038000000  |        | -0.513916000000 |        |        |  |
|                                | O                           | -2.839382000000 |         | 0.991908000000  |        | 0.041535000000  |        |        |  |
|                                | O                           | -2.380974000000 |         | 2.169906000000  |        | -0.528033000000 |        |        |  |
|                                | H                           | -1.699080000000 |         | 2.464806000000  |        | 0.090820000000  |        |        |  |
|                                | H                           | -2.517128000000 |         | -2.408017000000 |        | 0.935100000000  |        |        |  |

|                                |                             |                 |                 |                 |        |        |        |        |  |
|--------------------------------|-----------------------------|-----------------|-----------------|-----------------|--------|--------|--------|--------|--|
|                                | C                           | 1.586905000000  | -0.996785000000 | -0.853546000000 |        |        |        |        |  |
|                                | C                           | 2.919163000000  | -0.348546000000 | -0.467398000000 |        |        |        |        |  |
|                                | C                           | 2.733729000000  | 1.123966000000  | -0.095938000000 |        |        |        |        |  |
|                                | C                           | 1.686315000000  | 1.282429000000  | 1.007913000000  |        |        |        |        |  |
|                                | H                           | 1.736053000000  | -2.056575000000 | -1.083525000000 |        |        |        |        |  |
|                                | H                           | 0.960336000000  | -1.340818000000 | 1.156274000000  |        |        |        |        |  |
|                                | H                           | -0.016696000000 | 1.144712000000  | -0.297986000000 |        |        |        |        |  |
|                                | H                           | -0.389566000000 | 0.759830000000  | 1.386491000000  |        |        |        |        |  |
|                                | H                           | 3.340679000000  | -0.884820000000 | 0.391490000000  |        |        |        |        |  |
|                                | H                           | 3.637778000000  | -0.446775000000 | -1.285317000000 |        |        |        |        |  |
|                                | H                           | 3.686206000000  | 1.559990000000  | 0.216606000000  |        |        |        |        |  |
|                                | H                           | 2.405159000000  | 1.679440000000  | -0.982955000000 |        |        |        |        |  |
|                                | H                           | 2.051319000000  | 0.806738000000  | 1.926029000000  |        |        |        |        |  |
|                                | H                           | 1.536824000000  | 2.340895000000  | 1.239195000000  |        |        |        |        |  |
|                                | H                           | 1.210259000000  | -0.522977000000 | -1.769162000000 |        |        |        |        |  |
|                                | H                           | -0.492707000000 | -2.555013000000 | -0.488272000000 |        |        |        |        |  |
|                                | H                           | -1.078819000000 | -0.359784000000 | -1.914957000000 |        |        |        |        |  |
|                                | H                           | -1.042073000000 | -2.444977000000 | 1.911395000000  |        |        |        |        |  |
|                                | H                           | -1.917938000000 | -0.922056000000 | 1.668465000000  |        |        |        |        |  |
|                                | H                           | -2.460220000000 | -1.450081000000 | -1.476779000000 |        |        |        |        |  |
| frequencies                    | -1869.3                     | 55.7            | 77.8            | 87.8            | 119.4  | 124.3  | 182.5  | 207.8  |  |
|                                | 239.5                       | 247.2           | 282.4           | 305.0           | 373.6  | 411.4  | 436.5  | 446.9  |  |
|                                | 482.1                       | 502.3           | 535.4           | 596.0           | 642.2  | 787.3  | 806.1  | 849.8  |  |
|                                | 871.9                       | 902.7           | 906.7           | 930.2           | 940.3  | 965.9  | 979.8  | 1037.2 |  |
|                                | 1048.3                      | 1057.4          | 1072.0          | 1081.0          | 1096.1 | 1116.2 | 1137.3 | 1153.9 |  |
|                                | 1191.2                      | 1215.8          | 1232.3          | 1268.3          | 1293.0 | 1301.0 | 1310.2 | 1324.6 |  |
|                                | 1347.0                      | 1354.4          | 1369.7          | 1384.4          | 1387.4 | 1394.5 | 1406.3 | 1410.2 |  |
|                                | 1415.4                      | 1455.1          | 1467.5          | 1485.5          | 1489.8 | 1492.0 | 1500.6 | 1501.6 |  |
|                                | 1509.6                      | 1516.3          | 2980.8          | 3012.5          | 3029.4 | 3036.8 | 3038.7 | 3043.1 |  |
|                                | 3046.8                      | 3060.0          | 3085.3          | 3087.4          | 3093.5 | 3098.2 | 3101.2 | 3102.6 |  |
|                                | 3132.0                      | 3139.4          | 3183.4          | 3802.8          |        |        |        |        |  |
| electronic state               | 2-A                         |                 |                 |                 |        |        |        |        |  |
| point group                    | C1                          |                 |                 |                 |        |        |        |        |  |
| rotational constants           | 1.34545                     | 0.69370         | 0.55259         |                 |        |        |        |        |  |
| ZPE                            | 0.266988 (Hartree/Particle) |                 |                 |                 |        |        |        |        |  |
| TS <sub>d</sub> $\alpha$       |                             |                 |                 |                 |        |        |        |        |  |
| optimized Cartesian coordinate | C                           | 1.221274000000  | -1.264492000000 | -0.461099000000 |        |        |        |        |  |
|                                | C                           | 0.148928000000  | -0.197322000000 | -0.165784000000 |        |        |        |        |  |
|                                | C                           | -1.202559000000 | -0.804560000000 | 0.181428000000  |        |        |        |        |  |
|                                | C                           | -1.332942000000 | -1.463982000000 | 1.538482000000  |        |        |        |        |  |
|                                | C                           | -1.851615000000 | -1.580668000000 | -0.944358000000 |        |        |        |        |  |
|                                | H                           | -1.950602000000 | 0.238977000000  | 0.264375000000  |        |        |        |        |  |
|                                | O                           | -2.600052000000 | 1.291638000000  | 0.204467000000  |        |        |        |        |  |
|                                | O                           | -2.111996000000 | 1.916942000000  | -0.931156000000 |        |        |        |        |  |
|                                | H                           | -1.449620000000 | 2.531363000000  | -0.586480000000 |        |        |        |        |  |
|                                | H                           | -2.357433000000 | -1.804517000000 | 1.702321000000  |        |        |        |        |  |
|                                | H                           | -2.909638000000 | -1.753937000000 | -0.736313000000 |        |        |        |        |  |
|                                | C                           | 0.670840000000  | 0.773934000000  | 0.900440000000  |        |        |        |        |  |
|                                | C                           | 1.970014000000  | 1.443595000000  | 0.448263000000  |        |        |        |        |  |
|                                | C                           | 3.038905000000  | 0.393442000000  | 0.137580000000  |        |        |        |        |  |
|                                | C                           | 2.536298000000  | -0.613198000000 | -0.899049000000 |        |        |        |        |  |
|                                | H                           | -0.096645000000 | 1.519295000000  | 1.137746000000  |        |        |        |        |  |
|                                | H                           | 0.005038000000  | 0.373106000000  | -1.095223000000 |        |        |        |        |  |
|                                | H                           | 1.393046000000  | -1.859791000000 | 0.444484000000  |        |        |        |        |  |
|                                | H                           | 0.869083000000  | -1.949223000000 | -1.237020000000 |        |        |        |        |  |
|                                | H                           | 1.778165000000  | 2.040225000000  | -0.452490000000 |        |        |        |        |  |
|                                | H                           | 2.327743000000  | 2.133976000000  | 1.216662000000  |        |        |        |        |  |
|                                | H                           | 3.955431000000  | 0.873997000000  | -0.214622000000 |        |        |        |        |  |
|                                | H                           | 3.293878000000  | -0.139162000000 | 1.061931000000  |        |        |        |        |  |
|                                | H                           | 2.376032000000  | -0.097088000000 | -1.853280000000 |        |        |        |        |  |
|                                | H                           | 3.292408000000  | -1.382323000000 | -1.078694000000 |        |        |        |        |  |
|                                | H                           | 0.866421000000  | 0.223661000000  | 1.828525000000  |        |        |        |        |  |
|                                | H                           | -1.064662000000 | -0.790441000000 | 2.353808000000  |        |        |        |        |  |
|                                | H                           | -0.680572000000 | -2.344656000000 | 1.599421000000  |        |        |        |        |  |
|                                | H                           | -1.771072000000 | -1.041210000000 | -1.891063000000 |        |        |        |        |  |
|                                | H                           | -1.375478000000 | -2.561391000000 | -1.065997000000 |        |        |        |        |  |

|                                |                             |                 |         |        |                 |        |                 |        |
|--------------------------------|-----------------------------|-----------------|---------|--------|-----------------|--------|-----------------|--------|
| frequencies                    | -1692.0                     | 35.4            | 54.3    | 76.2   | 113.4           | 131.7  | 192.1           | 198.5  |
|                                | 218.5                       | 226.2           | 248.6   | 285.7  | 313.6           | 372.1  | 393.7           | 405.8  |
|                                | 435.6                       | 446.7           | 490.4   | 527.6  | 647.7           | 781.7  | 802.1           | 846.5  |
|                                | 866.2                       | 907.4           | 912.2   | 935.6  | 942.5           | 975.2  | 991.1           | 1045.8 |
|                                | 1054.6                      | 1068.6          | 1080.7  | 1090.9 | 1104.3          | 1125.4 | 1160.8          | 1164.0 |
|                                | 1200.1                      | 1236.0          | 1272.9  | 1280.0 | 1294.1          | 1302.9 | 1332.5          | 1347.3 |
|                                | 1365.7                      | 1371.4          | 1385.1  | 1387.5 | 1398.4          | 1406.8 | 1408.5          | 1414.0 |
|                                | 1463.4                      | 1479.0          | 1485.1  | 1486.5 | 1488.6          | 1491.0 | 1497.4          | 1499.8 |
|                                | 1507.7                      | 1512.1          | 3013.4  | 3031.5 | 3035.1          | 3035.5 | 3038.1          | 3042.0 |
|                                | 3043.9                      | 3048.0          | 3082.0  | 3095.9 | 3097.7          | 3100.2 | 3103.5          | 3108.8 |
|                                | 3111.8                      | 3137.6          | 3145.8  | 3800.4 |                 |        |                 |        |
| electronic state               | 2-A                         |                 |         |        |                 |        |                 |        |
| point group                    | C1                          |                 |         |        |                 |        |                 |        |
| rotational constants           | 1.38353                     | 0.71086         | 0.59144 |        |                 |        |                 |        |
| ZPE                            | 0.266670 (Hartree/Particle) |                 |         |        |                 |        |                 |        |
| TS <sub>d</sub> α'             |                             |                 |         |        |                 |        |                 |        |
| optimized Cartesian coordinate | C                           | -0.697974000000 |         |        | -0.184120000000 |        | 1.331103000000  |        |
|                                | C                           | 0.139727000000  |         |        | -0.280328000000 |        | 0.069003000000  |        |
|                                | C                           | 1.610832000000  |         |        | -0.605362000000 |        | 0.297771000000  |        |
|                                | C                           | 2.460198000000  |         |        | -0.424249000000 |        | -0.963515000000 |        |
|                                | C                           | 1.801879000000  |         |        | -2.021044000000 |        | 0.865020000000  |        |
|                                | H                           | 0.186820000000  |         |        | 0.947233000000  |        | -0.322801000000 |        |
|                                | O                           | 0.332316000000  |         |        | 2.152680000000  |        | -0.573677000000 |        |
|                                | O                           | 1.186065000000  |         |        | 2.591646000000  |        | 0.426424000000  |        |
|                                | H                           | 2.059413000000  |         |        | 2.552559000000  |        | 0.013600000000  |        |
|                                | H                           | 2.253383000000  |         |        | 0.532621000000  |        | -1.451630000000 |        |
|                                | H                           | 2.863607000000  |         |        | -2.218970000000 |        | 1.030940000000  |        |
|                                | H                           | 1.967464000000  |         |        | 0.103919000000  |        | 1.055188000000  |        |
|                                | H                           | 2.263036000000  |         |        | -1.216469000000 |        | -1.690385000000 |        |
|                                | C                           | -0.565703000000 |         |        | -0.989355000000 |        | -1.073418000000 |        |
|                                | C                           | -1.961909000000 |         |        | -0.408734000000 |        | -1.325555000000 |        |
|                                | C                           | -2.799294000000 |         |        | -0.398620000000 |        | -0.045987000000 |        |
|                                | C                           | -2.092293000000 |         |        | 0.387998000000  |        | 1.058718000000  |        |
|                                | H                           | 0.032747000000  |         |        | -0.939460000000 |        | -1.986490000000 |        |
|                                | H                           | -0.806048000000 |         |        | -1.193649000000 |        | 1.755999000000  |        |
|                                | H                           | -0.169517000000 |         |        | 0.420930000000  |        | 2.074853000000  |        |
|                                | H                           | -1.857818000000 |         |        | 0.618191000000  |        | -1.694297000000 |        |
|                                | H                           | -2.464444000000 |         |        | -0.981505000000 |        | -2.109111000000 |        |
|                                | H                           | -3.785167000000 |         |        | 0.029722000000  |        | -0.244302000000 |        |
|                                | H                           | -2.960953000000 |         |        | -1.431178000000 |        | 0.288658000000  |        |
|                                | H                           | -1.991153000000 |         |        | 1.434125000000  |        | 0.751372000000  |        |
|                                | H                           | -2.684051000000 |         |        | 0.375200000000  |        | 1.977434000000  |        |
|                                | H                           | -0.662741000000 |         |        | -2.055010000000 |        | -0.813399000000 |        |
|                                | H                           | 3.523427000000  |         |        | -0.466979000000 |        | -0.716126000000 |        |
|                                | H                           | 1.283552000000  |         |        | -2.150905000000 |        | 1.816473000000  |        |
|                                | H                           | 1.428623000000  |         |        | -2.772108000000 |        | 0.163207000000  |        |
| frequencies                    | -1680.3                     | 28.8            | 63.4    | 74.5   | 106.1           | 129.6  | 190.5           | 208.0  |
|                                | 235.4                       | 250.5           | 274.1   | 278.7  | 324.1           | 364.9  | 406.0           | 410.1  |
|                                | 429.7                       | 454.0           | 489.9   | 537.9  | 615.1           | 790.0  | 794.0           | 853.6  |
|                                | 873.1                       | 908.1           | 918.2   | 934.1  | 938.0           | 972.8  | 974.9           | 1051.7 |
|                                | 1058.3                      | 1073.1          | 1078.6  | 1097.5 | 1102.4          | 1128.7 | 1158.3          | 1176.4 |
|                                | 1194.3                      | 1212.1          | 1255.6  | 1270.9 | 1296.8          | 1315.0 | 1344.4          | 1350.5 |
|                                | 1365.4                      | 1378.2          | 1388.0  | 1389.8 | 1398.4          | 1401.0 | 1408.8          | 1420.5 |
|                                | 1459.5                      | 1467.6          | 1476.1  | 1493.4 | 1493.6          | 1493.8 | 1499.7          | 1509.1 |
|                                | 1511.9                      | 1520.0          | 2999.6  | 3005.5 | 3036.5          | 3037.2 | 3052.3          | 3053.2 |
|                                | 3058.3                      | 3060.2          | 3084.5  | 3098.5 | 3101.9          | 3103.3 | 3109.3          | 3124.8 |
|                                | 3125.9                      | 3130.6          | 3142.3  | 3803.1 |                 |        |                 |        |
| electronic state               | 2-A                         |                 |         |        |                 |        |                 |        |
| point group                    | C1                          |                 |         |        |                 |        |                 |        |
| rotational constants           | 1.17857                     | 0.85289         | 0.67145 |        |                 |        |                 |        |
| ZPE                            | 0.266989 (Hartree/Particle) |                 |         |        |                 |        |                 |        |
| TS <sub>d</sub> β'             |                             |                 |         |        |                 |        |                 |        |

|                                      |                             |                 |                 |                 |        |        |        |        |       |
|--------------------------------------|-----------------------------|-----------------|-----------------|-----------------|--------|--------|--------|--------|-------|
| optimized<br>Cartesian<br>coordinate | C                           | 0.114896000000  | 0.081332000000  | 0.949527000000  |        |        |        |        |       |
|                                      | C                           | 1.455706000000  | -0.517905000000 | 1.314096000000  |        |        |        |        |       |
|                                      | C                           | 2.174050000000  | -1.090516000000 | 0.088062000000  |        |        |        |        |       |
|                                      | H                           | 0.445859000000  | 1.075326000000  | 0.156733000000  |        |        |        |        |       |
|                                      | O                           | 0.895451000000  | 1.961399000000  | -0.544397000000 |        |        |        |        |       |
|                                      | O                           | 2.166380000000  | 2.199973000000  | -0.038653000000 |        |        |        |        |       |
|                                      | H                           | 2.039481000000  | 2.966639000000  | 0.534770000000  |        |        |        |        |       |
|                                      | C                           | -0.036326000000 | -1.347362000000 | -1.097420000000 |        |        |        |        |       |
|                                      | C                           | -0.791315000000 | -0.818247000000 | 0.130570000000  |        |        |        |        |       |
|                                      | H                           | 3.087570000000  | -1.602641000000 | 0.400705000000  |        |        |        |        |       |
|                                      | H                           | 0.199323000000  | -0.513722000000 | -1.768094000000 |        |        |        |        |       |
|                                      | H                           | -0.682791000000 | -2.037017000000 | -1.648681000000 |        |        |        |        |       |
|                                      | H                           | 1.281561000000  | -1.321911000000 | 2.045849000000  |        |        |        |        |       |
|                                      | H                           | 2.083971000000  | 0.226870000000  | 1.809029000000  |        |        |        |        |       |
|                                      | H                           | -0.379098000000 | 0.605091000000  | 1.771279000000  |        |        |        |        |       |
|                                      | H                           | -1.002095000000 | -1.693914000000 | 0.770408000000  |        |        |        |        |       |
|                                      | H                           | 2.474530000000  | -0.261392000000 | -0.560232000000 |        |        |        |        |       |
|                                      | C                           | -2.156094000000 | -0.195866000000 | -0.222665000000 |        |        |        |        |       |
|                                      | H                           | -2.648010000000 | -0.909781000000 | -0.894848000000 |        |        |        |        |       |
|                                      | C                           | -2.037964000000 | 1.140930000000  | -0.959128000000 |        |        |        |        |       |
|                                      | H                           | -3.021079000000 | 1.469018000000  | -1.305051000000 |        |        |        |        |       |
|                                      | H                           | -1.643590000000 | 1.918964000000  | -0.299351000000 |        |        |        |        |       |
|                                      | H                           | -1.378783000000 | 1.079875000000  | -1.827275000000 |        |        |        |        |       |
|                                      | C                           | -3.045026000000 | -0.040075000000 | 1.013240000000  |        |        |        |        |       |
|                                      | H                           | -2.630315000000 | 0.692931000000  | 1.711022000000  |        |        |        |        |       |
|                                      | H                           | -4.040441000000 | 0.310315000000  | 0.729899000000  |        |        |        |        |       |
|                                      | H                           | -3.159014000000 | -0.987991000000 | 1.545592000000  |        |        |        |        |       |
|                                      | C                           | 1.265728000000  | -2.042051000000 | -0.692229000000 |        |        |        |        |       |
|                                      | H                           | 1.785287000000  | -2.412737000000 | -1.579642000000 |        |        |        |        |       |
|                                      | H                           | 1.031060000000  | -2.916333000000 | -0.072034000000 |        |        |        |        |       |
|                                      | frequencies                 | -1782.3         | 54.3            | 80.5            | 92.3   | 113.4  | 142.6  | 196.4  | 217.5 |
|                                      |                             | 230.2           | 264.2           | 282.7           | 285.7  | 322.4  | 358.2  | 402.3  | 427.3 |
|                                      |                             | 460.3           | 481.3           | 522.8           | 587.5  | 596.1  | 776.4  | 801.4  | 847.6 |
|                                      | 874.8                       | 902.9           | 907.6           | 929.6           | 937.8  | 971.6  | 973.8  | 1038.6 |       |
|                                      | 1058.0                      | 1061.0          | 1066.9          | 1098.5          | 1103.3 | 1130.6 | 1156.6 | 1168.8 |       |
|                                      | 1196.9                      | 1212.8          | 1232.1          | 1264.8          | 1288.4 | 1310.5 | 1322.9 | 1344.6 |       |
|                                      | 1359.3                      | 1368.0          | 1378.4          | 1388.7          | 1392.0 | 1397.9 | 1407.2 | 1409.8 |       |
|                                      | 1426.9                      | 1462.1          | 1469.5          | 1486.6          | 1492.3 | 1494.1 | 1502.6 | 1507.4 |       |
|                                      | 1513.0                      | 1516.1          | 2957.3          | 2999.9          | 3036.5 | 3037.2 | 3051.8 | 3053.0 |       |
|                                      | 3060.5                      | 3067.5          | 3096.0          | 3098.1          | 3100.4 | 3107.6 | 3113.4 | 3122.5 |       |
|                                      | 3126.4                      | 3128.3          | 3141.4          | 3820.1          |        |        |        |        |       |
| electronic state                     | 2-A                         |                 |                 |                 |        |        |        |        |       |
| point group                          | C1                          |                 |                 |                 |        |        |        |        |       |
| rotational constants                 | 1.22978                     | 0.82334         | 0.63277         |                 |        |        |        |        |       |
| ZPE                                  | 0.266971 (Hartree/Particle) |                 |                 |                 |        |        |        |        |       |
| TS <sub>d</sub> '                    |                             |                 |                 |                 |        |        |        |        |       |
| optimized<br>Cartesian<br>coordinate | C                           | -1.482034000000 | -0.312830000000 | 1.108294000000  |        |        |        |        |       |
|                                      | C                           | -0.010789000000 | 0.034441000000  | 1.075328000000  |        |        |        |        |       |
|                                      | C                           | 0.590889000000  | -0.179156000000 | -0.321100000000 |        |        |        |        |       |
|                                      | H                           | -2.015302000000 | 0.567495000000  | 0.298714000000  |        |        |        |        |       |
|                                      | O                           | -2.370979000000 | 1.432477000000  | -0.477512000000 |        |        |        |        |       |
|                                      | O                           | -1.434135000000 | 2.444198000000  | -0.313597000000 |        |        |        |        |       |
|                                      | H                           | -1.868131000000 | 3.056970000000  | 0.293904000000  |        |        |        |        |       |
|                                      | C                           | -1.211335000000 | -1.865878000000 | -0.855938000000 |        |        |        |        |       |
|                                      | C                           | -1.852712000000 | -1.655405000000 | 0.518814000000  |        |        |        |        |       |
|                                      | H                           | -1.668158000000 | -1.175851000000 | -1.573311000000 |        |        |        |        |       |
|                                      | H                           | -1.413422000000 | -2.880677000000 | -1.207752000000 |        |        |        |        |       |
|                                      | H                           | 0.507972000000  | -0.607272000000 | 1.804742000000  |        |        |        |        |       |
|                                      | H                           | 0.132170000000  | 1.067175000000  | 1.403366000000  |        |        |        |        |       |
|                                      | H                           | -1.979760000000 | -0.081100000000 | 2.052270000000  |        |        |        |        |       |
|                                      | H                           | -1.494463000000 | -2.437774000000 | 1.205675000000  |        |        |        |        |       |
|                                      | H                           | -2.939239000000 | -1.763024000000 | 0.464892000000  |        |        |        |        |       |
|                                      | H                           | 0.062464000000  | 0.503829000000  | -0.999054000000 |        |        |        |        |       |
|                                      | C                           | 2.083766000000  | 0.188548000000  | -0.415986000000 |        |        |        |        |       |
|                                      | H                           | 2.361887000000  | 0.038578000000  | -1.466918000000 |        |        |        |        |       |
|                                      | C                           | 2.318479000000  | 1.664543000000  | -0.083629000000 |        |        |        |        |       |



|                                |                             |                 |                 |                 |        |        |        |        |
|--------------------------------|-----------------------------|-----------------|-----------------|-----------------|--------|--------|--------|--------|
|                                | H                           | 2.208610000000  | 1.849373000000  | 0.988799000000  |        |        |        |        |
|                                | H                           | 3.330547000000  | 1.967196000000  | -0.363112000000 |        |        |        |        |
|                                | H                           | 1.607292000000  | 2.305710000000  | -0.610853000000 |        |        |        |        |
|                                | C                           | 2.998156000000  | -0.697710000000 | 0.433454000000  |        |        |        |        |
|                                | H                           | 2.769075000000  | -0.597731000000 | 1.498437000000  |        |        |        |        |
|                                | H                           | 2.916383000000  | -1.752826000000 | 0.164919000000  |        |        |        |        |
|                                | H                           | 4.041520000000  | -0.402015000000 | 0.297592000000  |        |        |        |        |
|                                | C                           | 0.295516000000  | -1.605811000000 | -0.797357000000 |        |        |        |        |
|                                | H                           | 0.755481000000  | -2.329361000000 | -0.112613000000 |        |        |        |        |
|                                | H                           | 0.746369000000  | -1.766535000000 | -1.782105000000 |        |        |        |        |
| frequencies                    | -1752.2                     | 39.0            | 65.1            | 77.6            | 101.6  | 143.6  | 189.5  | 219.0  |
|                                | 241.7                       | 256.5           | 266.6           | 283.8           | 317.9  | 359.6  | 408.7  | 423.6  |
|                                | 461.9                       | 474.8           | 518.1           | 573.4           | 606.4  | 775.7  | 804.5  | 848.0  |
|                                | 865.9                       | 902.0           | 908.4           | 929.8           | 940.0  | 970.6  | 976.4  | 1039.6 |
|                                | 1053.9                      | 1063.6          | 1071.0          | 1088.9          | 1110.4 | 1137.4 | 1159.9 | 1168.2 |
|                                | 1202.9                      | 1214.3          | 1237.7          | 1271.6          | 1290.5 | 1312.1 | 1331.2 | 1347.8 |
|                                | 1357.7                      | 1370.4          | 1376.2          | 1388.7          | 1402.6 | 1405.0 | 1407.1 | 1412.4 |
|                                | 1425.5                      | 1460.6          | 1463.3          | 1473.1          | 1490.2 | 1492.9 | 1501.3 | 1503.2 |
|                                | 1513.4                      | 1516.8          | 2997.2          | 3001.2          | 3030.8 | 3035.0 | 3048.9 | 3051.7 |
|                                | 3057.0                      | 3058.0          | 3086.6          | 3094.4          | 3100.3 | 3107.3 | 3110.8 | 3119.7 |
|                                | 3123.8                      | 3129.7          | 3135.4          | 3817.3          |        |        |        |        |
| electronic state               | 2-A                         |                 |                 |                 |        |        |        |        |
| point group                    | C1                          |                 |                 |                 |        |        |        |        |
| rotational constants           | 1.21954                     | 0.83074         | 0.59213         |                 |        |        |        |        |
| ZPE                            | 0.266811 (Hartree/Particle) |                 |                 |                 |        |        |        |        |
| TS <sub>d</sub> δ'             |                             |                 |                 |                 |        |        |        |        |
| optimized Cartesian coordinate | C                           | -1.752352000000 | -1.277073000000 | 0.047630000000  |        |        |        |        |
|                                | C                           | -1.287795000000 | -0.757858000000 | 1.388306000000  |        |        |        |        |
|                                | C                           | -0.103821000000 | 0.202773000000  | 1.242781000000  |        |        |        |        |
|                                | C                           | 1.032815000000  | -0.420746000000 | 0.423630000000  |        |        |        |        |
|                                | C                           | 2.283043000000  | 0.480472000000  | 0.383820000000  |        |        |        |        |
|                                | C                           | 2.085340000000  | 1.758939000000  | -0.435443000000 |        |        |        |        |
|                                | C                           | 3.514120000000  | -0.278007000000 | -0.117587000000 |        |        |        |        |
|                                | H                           | -2.186800000000 | -0.203784000000 | -0.561078000000 |        |        |        |        |
|                                | O                           | -2.520127000000 | 0.869092000000  | -1.024372000000 |        |        |        |        |
|                                | O                           | -2.890381000000 | 1.618575000000  | 0.083662000000  |        |        |        |        |
|                                | H                           | -3.851755000000 | 1.528711000000  | 0.105557000000  |        |        |        |        |
|                                | H                           | 2.952265000000  | 2.415139000000  | -0.326408000000 |        |        |        |        |
|                                | H                           | 4.410344000000  | 0.341482000000  | -0.032431000000 |        |        |        |        |
|                                | C                           | 0.506493000000  | -0.808725000000 | -0.964009000000 |        |        |        |        |
|                                | C                           | -0.658660000000 | -1.798320000000 | -0.857632000000 |        |        |        |        |
|                                | H                           | 0.263323000000  | 0.488088000000  | 2.233492000000  |        |        |        |        |
|                                | H                           | 1.331240000000  | -1.349341000000 | 0.934555000000  |        |        |        |        |
|                                | H                           | 0.154722000000  | 0.090834000000  | -1.480468000000 |        |        |        |        |
|                                | H                           | 1.301206000000  | -1.246349000000 | -1.574080000000 |        |        |        |        |
|                                | H                           | -0.986971000000 | -1.619606000000 | 2.004179000000  |        |        |        |        |
|                                | H                           | -2.112233000000 | -0.268824000000 | 1.913947000000  |        |        |        |        |
|                                | H                           | -2.647398000000 | -1.901333000000 | 0.085531000000  |        |        |        |        |
|                                | H                           | -0.290573000000 | -2.747741000000 | -0.439384000000 |        |        |        |        |
|                                | H                           | -1.061296000000 | -2.030234000000 | -1.847262000000 |        |        |        |        |
|                                | H                           | -0.457879000000 | 1.115754000000  | 0.753521000000  |        |        |        |        |
|                                | H                           | 2.480068000000  | 0.775851000000  | 1.422305000000  |        |        |        |        |
|                                | H                           | 1.201520000000  | 2.318798000000  | -0.123238000000 |        |        |        |        |
|                                | H                           | 1.980667000000  | 1.529331000000  | -1.499359000000 |        |        |        |        |
|                                | H                           | 3.679931000000  | -1.192727000000 | 0.457624000000  |        |        |        |        |
|                                | H                           | 3.408589000000  | -0.554122000000 | -1.170303000000 |        |        |        |        |
| frequencies                    | -1755.3                     | 35.1            | 49.5            | 71.9            | 104.3  | 139.5  | 199.7  | 219.3  |
|                                | 237.1                       | 254.1           | 266.2           | 284.5           | 310.5  | 349.2  | 402.0  | 436.4  |
|                                | 457.0                       | 472.8           | 523.2           | 572.5           | 614.1  | 785.8  | 788.1  | 847.4  |
|                                | 863.1                       | 906.6           | 917.0           | 930.0           | 937.3  | 968.7  | 972.7  | 1036.2 |
|                                | 1055.3                      | 1059.7          | 1073.2          | 1095.5          | 1102.7 | 1135.1 | 1158.5 | 1173.3 |
|                                | 1200.0                      | 1213.6          | 1226.2          | 1267.2          | 1302.3 | 1316.9 | 1327.5 | 1349.7 |
|                                | 1353.8                      | 1365.8          | 1373.5          | 1384.2          | 1401.7 | 1406.2 | 1406.8 | 1414.6 |
|                                | 1426.8                      | 1457.1          | 1463.8          | 1476.7          | 1487.0 | 1491.1 | 1501.6 | 1506.5 |
|                                | 1513.6                      | 1516.0          | 2996.4          | 2997.7          | 3003.0 | 3031.5 | 3052.3 | 3057.8 |
|                                | 3059.3                      | 3063.3          | 3092.0          | 3094.5          | 3105.4 | 3108.3 | 3112.0 | 3123.6 |

|                                |                             |                 |                 |                 |        |        |        |        |
|--------------------------------|-----------------------------|-----------------|-----------------|-----------------|--------|--------|--------|--------|
|                                | 3125.8                      | 3127.4          | 3138.5          | 3819.6          |        |        |        |        |
| electronic state               | 2-A                         |                 |                 |                 |        |        |        |        |
| point group                    | C1                          |                 |                 |                 |        |        |        |        |
| rotational constants           | 1.55237                     | 0.63788         | 0.56760         |                 |        |        |        |        |
| ZPE                            | 0.266691 (Hartree/Particle) |                 |                 |                 |        |        |        |        |
| <i>s</i> BCH                   |                             |                 |                 |                 |        |        |        |        |
| optimized Cartesian coordinate | C                           | -0.428754000000 | -0.672422000000 | -0.934536000000 |        |        |        |        |
|                                | C                           | 0.043681000000  | 0.091735000000  | 0.309433000000  |        |        |        |        |
|                                | C                           | 1.454733000000  | 0.700997000000  | 0.179430000000  |        |        |        |        |
|                                | C                           | -1.010136000000 | 1.133955000000  | 0.704875000000  |        |        |        |        |
|                                | C                           | -2.370122000000 | 0.481982000000  | 0.964261000000  |        |        |        |        |
|                                | C                           | -2.840495000000 | -0.296533000000 | -0.266242000000 |        |        |        |        |
|                                | C                           | -1.793853000000 | -1.325975000000 | -0.696641000000 |        |        |        |        |
|                                | H                           | -0.673045000000 | 1.686173000000  | 1.588916000000  |        |        |        |        |
|                                | H                           | 0.086502000000  | -0.633141000000 | 1.134399000000  |        |        |        |        |
|                                | H                           | -0.506134000000 | 0.020088000000  | -1.781949000000 |        |        |        |        |
|                                | H                           | 0.299995000000  | -1.438013000000 | -1.216434000000 |        |        |        |        |
|                                | H                           | -2.286638000000 | -0.204158000000 | 1.815884000000  |        |        |        |        |
|                                | H                           | -3.108261000000 | 1.240543000000  | 1.238916000000  |        |        |        |        |
|                                | H                           | -3.796718000000 | -0.787484000000 | -0.065696000000 |        |        |        |        |
|                                | H                           | -3.010759000000 | 0.407268000000  | -1.090328000000 |        |        |        |        |
|                                | H                           | -1.692650000000 | -2.084534000000 | 0.089600000000  |        |        |        |        |
|                                | H                           | -2.123844000000 | -1.848475000000 | -1.598759000000 |        |        |        |        |
|                                | H                           | -1.123774000000 | 1.865295000000  | -0.104105000000 |        |        |        |        |
|                                | H                           | 1.700418000000  | 1.112438000000  | 1.168772000000  |        |        |        |        |
|                                | C                           | 1.531083000000  | 1.848992000000  | -0.831208000000 |        |        |        |        |
|                                | H                           | 1.241798000000  | 1.514953000000  | -1.831721000000 |        |        |        |        |
|                                | H                           | 0.888455000000  | 2.686199000000  | -0.553941000000 |        |        |        |        |
|                                | H                           | 2.554736000000  | 2.226490000000  | -0.896243000000 |        |        |        |        |
|                                | C                           | 2.530251000000  | -0.345045000000 | -0.151520000000 |        |        |        |        |
|                                | H                           | 3.504802000000  | 0.152353000000  | -0.109282000000 |        |        |        |        |
|                                | H                           | 2.409155000000  | -0.675818000000 | -1.189316000000 |        |        |        |        |
|                                | C                           | 2.546320000000  | -1.556620000000 | 0.778551000000  |        |        |        |        |
|                                | H                           | 3.417498000000  | -2.185705000000 | 0.585361000000  |        |        |        |        |
|                                | H                           | 2.585589000000  | -1.242983000000 | 1.825911000000  |        |        |        |        |
|                                | H                           | 1.656617000000  | -2.177880000000 | 0.651595000000  |        |        |        |        |
| frequencies                    | 65.6                        | 97.7            | 152.8           | 205.7           | 207.3  | 235.5  | 245.9  | 288.2  |
|                                | 296.4                       | 349.5           | 397.5           | 433.1           | 447.4  | 478.3  | 510.1  | 580.7  |
|                                | 769.0                       | 800.0           | 805.5           | 836.6           | 864.0  | 897.3  | 908.2  | 938.0  |
|                                | 947.2                       | 977.7           | 1011.5          | 1030.7          | 1054.9 | 1061.3 | 1081.1 | 1090.1 |
|                                | 1101.3                      | 1117.4          | 1153.5          | 1181.2          | 1206.9 | 1222.2 | 1269.4 | 1290.4 |
|                                | 1296.3                      | 1302.0          | 1320.4          | 1333.2          | 1344.8 | 1361.5 | 1371.6 | 1385.6 |
|                                | 1386.8                      | 1390.4          | 1402.0          | 1408.0          | 1415.7 | 1419.7 | 1483.5 | 1487.6 |
|                                | 1490.6                      | 1494.7          | 1496.1          | 1504.5          | 1506.8 | 1510.6 | 1511.8 | 1515.0 |
|                                | 3011.1                      | 3022.8          | 3034.7          | 3037.7          | 3040.8 | 3043.0 | 3045.1 | 3048.6 |
|                                | 3055.7                      | 3060.4          | 3080.8          | 3084.6          | 3092.7 | 3094.3 | 3095.8 | 3100.0 |
|                                | 3122.7                      | 3124.3          | 3132.2          | 3140.3          |        |        |        |        |
| electronic state               | 1-A                         |                 |                 |                 |        |        |        |        |
| point group                    | C1                          |                 |                 |                 |        |        |        |        |
| rotational constants           | 2.02031                     | 0.83501         | 0.72728         |                 |        |        |        |        |
| ZPE                            | 0.285257 (Hartree/Particle) |                 |                 |                 |        |        |        |        |
| <i>s</i> BP1                   |                             |                 |                 |                 |        |        |        |        |
| optimized Cartesian coordinate | C                           | -0.402126000000 | -0.727807000000 | -0.897523000000 |        |        |        |        |
|                                | C                           | 0.072380000000  | 0.076265000000  | 0.319820000000  |        |        |        |        |
|                                | C                           | 1.496468000000  | 0.653736000000  | 0.182156000000  |        |        |        |        |
|                                | C                           | 2.544922000000  | -0.436808000000 | -0.108496000000 |        |        |        |        |
|                                | C                           | 2.533730000000  | -1.567784000000 | 0.859608000000  |        |        |        |        |
|                                | C                           | -0.961343000000 | 1.154583000000  | 0.666448000000  |        |        |        |        |
|                                | C                           | -2.339170000000 | 0.544384000000  | 0.932773000000  |        |        |        |        |
|                                | C                           | -2.813180000000 | -0.265656000000 | -0.275635000000 |        |        |        |        |
|                                | C                           | -1.787012000000 | -1.335549000000 | -0.652482000000 |        |        |        |        |
|                                | H                           | -0.621207000000 | 1.731016000000  | 1.533833000000  |        |        |        |        |

|                                |                             |                 |                 |                 |        |        |        |        |  |
|--------------------------------|-----------------------------|-----------------|-----------------|-----------------|--------|--------|--------|--------|--|
|                                | H                           | 0.100992000000  | -0.624761000000 | 1.166166000000  |        |        |        |        |  |
|                                | H                           | -0.447425000000 | -0.074422000000 | -1.777921000000 |        |        |        |        |  |
|                                | H                           | 0.308956000000  | -1.527456000000 | -1.124094000000 |        |        |        |        |  |
|                                | H                           | -2.281491000000 | -0.113282000000 | 1.808566000000  |        |        |        |        |  |
|                                | H                           | -3.061678000000 | 1.329569000000  | 1.171853000000  |        |        |        |        |  |
|                                | H                           | -3.783942000000 | -0.725416000000 | -0.070971000000 |        |        |        |        |  |
|                                | H                           | -2.955071000000 | 0.412123000000  | -1.126553000000 |        |        |        |        |  |
|                                | H                           | -1.713577000000 | -2.064889000000 | 0.163528000000  |        |        |        |        |  |
|                                | H                           | -2.118455000000 | -1.884665000000 | -1.538110000000 |        |        |        |        |  |
|                                | H                           | -1.049882000000 | 1.858843000000  | -0.169480000000 |        |        |        |        |  |
|                                | H                           | 1.747561000000  | 1.088957000000  | 1.159485000000  |        |        |        |        |  |
|                                | H                           | 3.533928000000  | 0.048439000000  | -0.101901000000 |        |        |        |        |  |
|                                | H                           | 2.414218000000  | -0.811159000000 | -1.129451000000 |        |        |        |        |  |
|                                | H                           | 2.427629000000  | -1.371579000000 | 1.919877000000  |        |        |        |        |  |
|                                | H                           | 2.818168000000  | -2.567605000000 | 0.561217000000  |        |        |        |        |  |
|                                | C                           | 1.610684000000  | 1.763648000000  | -0.865601000000 |        |        |        |        |  |
|                                | H                           | 0.985589000000  | 2.623922000000  | -0.621642000000 |        |        |        |        |  |
|                                | H                           | 2.643231000000  | 2.115306000000  | -0.934319000000 |        |        |        |        |  |
|                                | H                           | 1.320336000000  | 1.402987000000  | -1.856482000000 |        |        |        |        |  |
| frequencies                    | 46.9                        | 101.5           | 111.8           | 150.4           | 205.4  | 224.8  | 233.7  | 255.8  |  |
|                                | 294.2                       | 346.6           | 396.7           | 433.9           | 445.9  | 458.0  | 498.9  | 513.8  |  |
|                                | 578.6                       | 776.9           | 800.4           | 822.9           | 848.6  | 867.2  | 901.8  | 915.2  |  |
|                                | 941.9                       | 948.6           | 970.8           | 1016.5          | 1049.8 | 1057.7 | 1079.7 | 1095.2 |  |
|                                | 1104.8                      | 1115.4          | 1137.2          | 1178.0          | 1185.5 | 1202.7 | 1247.3 | 1270.1 |  |
|                                | 1294.7                      | 1301.6          | 1312.7          | 1330.7          | 1340.2 | 1358.1 | 1369.7 | 1384.6 |  |
|                                | 1385.3                      | 1387.3          | 1398.2          | 1409.3          | 1419.6 | 1465.4 | 1480.2 | 1483.6 |  |
|                                | 1487.2                      | 1490.4          | 1494.9          | 1505.0          | 1509.6 | 1510.6 | 2982.7 | 3013.0 |  |
|                                | 3022.8                      | 3035.3          | 3036.7          | 3040.7          | 3042.2 | 3045.2 | 3059.9 | 3073.6 |  |
|                                | 3083.0                      | 3093.8          | 3094.3          | 3097.5          | 3100.9 | 3123.3 | 3141.7 | 3164.0 |  |
|                                | 3268.2                      |                 |                 |                 |        |        |        |        |  |
| electronic state               | 2-A                         |                 |                 |                 |        |        |        |        |  |
| point group                    | C1                          |                 |                 |                 |        |        |        |        |  |
| rotational constants           | 2.06261                     | 0.84742         | 0.73970         |                 |        |        |        |        |  |
| ZPE                            | 0.269893 (Hartree/Particle) |                 |                 |                 |        |        |        |        |  |
|                                |                             |                 |                 |                 |        |        |        |        |  |
| sBP2                           |                             |                 |                 |                 |        |        |        |        |  |
| optimized Cartesian coordinate | C                           | 1.053694000000  | 1.252312000000  | -0.237748000000 |        |        |        |        |  |
|                                | C                           | 0.106946000000  | 0.149347000000  | 0.252047000000  |        |        |        |        |  |
|                                | C                           | -1.347578000000 | 0.356333000000  | -0.210405000000 |        |        |        |        |  |
|                                | C                           | -2.257341000000 | -0.677092000000 | 0.380155000000  |        |        |        |        |  |
|                                | C                           | -3.598846000000 | -0.952072000000 | -0.209335000000 |        |        |        |        |  |
|                                | C                           | 0.630166000000  | -1.222420000000 | -0.197090000000 |        |        |        |        |  |
|                                | C                           | 2.074290000000  | -1.469722000000 | 0.241753000000  |        |        |        |        |  |
|                                | C                           | 2.999847000000  | -0.365139000000 | -0.268290000000 |        |        |        |        |  |
|                                | C                           | 2.501846000000  | 1.004195000000  | 0.193032000000  |        |        |        |        |  |
|                                | H                           | -0.022921000000 | -2.013059000000 | 0.182080000000  |        |        |        |        |  |
|                                | H                           | 0.108180000000  | 0.171700000000  | 1.353577000000  |        |        |        |        |  |
|                                | H                           | 1.001918000000  | 1.297824000000  | -1.334803000000 |        |        |        |        |  |
|                                | H                           | 0.729859000000  | 2.226502000000  | 0.135881000000  |        |        |        |        |  |
|                                | H                           | 2.118488000000  | -1.497819000000 | 1.337536000000  |        |        |        |        |  |
|                                | H                           | 2.412302000000  | -2.447120000000 | -0.113338000000 |        |        |        |        |  |
|                                | H                           | 4.024535000000  | -0.533834000000 | 0.073972000000  |        |        |        |        |  |
|                                | H                           | 3.020716000000  | -0.390965000000 | -1.364777000000 |        |        |        |        |  |
|                                | H                           | 2.560912000000  | 1.055311000000  | 1.287321000000  |        |        |        |        |  |
|                                | H                           | 3.147202000000  | 1.797207000000  | -0.194703000000 |        |        |        |        |  |
|                                | H                           | 0.574092000000  | -1.268840000000 | -1.293611000000 |        |        |        |        |  |
|                                | H                           | -1.367619000000 | 0.242802000000  | -1.305443000000 |        |        |        |        |  |
|                                | H                           | -2.064260000000 | -0.995381000000 | 1.401083000000  |        |        |        |        |  |
|                                | H                           | -3.983369000000 | -1.925971000000 | 0.101269000000  |        |        |        |        |  |
|                                | H                           | -4.347770000000 | -0.205352000000 | 0.093902000000  |        |        |        |        |  |
|                                | H                           | -3.558646000000 | -0.932537000000 | -1.302706000000 |        |        |        |        |  |
|                                | C                           | -1.878963000000 | 1.767277000000  | 0.113490000000  |        |        |        |        |  |
|                                | H                           | -1.763662000000 | 1.980011000000  | 1.180905000000  |        |        |        |        |  |
|                                | H                           | -1.353898000000 | 2.539951000000  | -0.451206000000 |        |        |        |        |  |
|                                | H                           | -2.940420000000 | 1.841449000000  | -0.132587000000 |        |        |        |        |  |
| frequencies                    | 39.7                        | 67.2            | 108.4           | 125.1           | 182.5  | 232.5  | 240.2  | 277.7  |  |
|                                | 319.5                       | 321.4           | 371.2           | 394.5           | 441.7  | 456.1  | 480.3  | 527.6  |  |

|                                |                             |                 |         |                 |        |                 |        |        |  |
|--------------------------------|-----------------------------|-----------------|---------|-----------------|--------|-----------------|--------|--------|--|
|                                | 569.6                       | 797.3           | 803.8   | 848.7           | 870.7  | 896.6           | 906.7  | 938.3  |  |
|                                | 948.6                       | 974.4           | 998.4   | 1024.1          | 1050.9 | 1061.9          | 1075.8 | 1094.4 |  |
|                                | 1110.3                      | 1130.2          | 1136.7  | 1173.6          | 1189.6 | 1224.3          | 1243.9 | 1289.3 |  |
|                                | 1293.6                      | 1298.3          | 1314.4  | 1336.8          | 1353.4 | 1367.5          | 1380.0 | 1386.4 |  |
|                                | 1387.9                      | 1393.3          | 1403.8  | 1408.8          | 1423.3 | 1478.9          | 1482.2 | 1487.5 |  |
|                                | 1489.2                      | 1493.4          | 1494.6  | 1498.0          | 1508.1 | 1515.9          | 2991.4 | 2996.0 |  |
|                                | 3003.2                      | 3021.0          | 3028.5  | 3036.7          | 3039.7 | 3045.0          | 3052.4 | 3075.0 |  |
|                                | 3092.5                      | 3093.9          | 3096.1  | 3098.4          | 3103.5 | 3123.2          | 3126.2 | 3136.1 |  |
|                                | 3166.9                      |                 |         |                 |        |                 |        |        |  |
| electronic state               | 2-A                         |                 |         |                 |        |                 |        |        |  |
| point group                    | C1                          |                 |         |                 |        |                 |        |        |  |
| rotational constants           | 2.50374                     | 0.74272         | 0.60678 |                 |        |                 |        |        |  |
| ZPE                            | 0.269882 (Hartree/Particle) |                 |         |                 |        |                 |        |        |  |
|                                |                             |                 |         |                 |        |                 |        |        |  |
| <i>s</i> BP3                   |                             |                 |         |                 |        |                 |        |        |  |
| optimized Cartesian coordinate | C                           | 0.990568000000  |         | 1.324479000000  |        | -0.116762000000 |        |        |  |
|                                | C                           | -0.027642000000 |         | 0.191663000000  |        | 0.080078000000  |        |        |  |
|                                | C                           | -1.384517000000 |         | 0.571506000000  |        | -0.543348000000 |        |        |  |
|                                | C                           | -1.966051000000 |         | 1.780372000000  |        | 0.117237000000  |        |        |  |
|                                | C                           | -2.416279000000 |         | -0.584675000000 |        | -0.548159000000 |        |        |  |
|                                | C                           | 0.539947000000  |         | -1.116417000000 |        | -0.484594000000 |        |        |  |
|                                | C                           | 1.910006000000  |         | -1.453202000000 |        | 0.110183000000  |        |        |  |
|                                | C                           | 2.907029000000  |         | -0.312369000000 |        | -0.092693000000 |        |        |  |
|                                | C                           | 2.355888000000  |         | 0.990787000000  |        | 0.486267000000  |        |        |  |
|                                | H                           | -0.147637000000 |         | -1.945650000000 |        | -0.299670000000 |        |        |  |
|                                | H                           | -0.175449000000 |         | 0.058482000000  |        | 1.162538000000  |        |        |  |
|                                | H                           | 1.105828000000  |         | 1.499955000000  |        | -1.195302000000 |        |        |  |
|                                | H                           | 0.605095000000  |         | 2.254423000000  |        | 0.309999000000  |        |        |  |
|                                | H                           | 1.794755000000  |         | -1.640316000000 |        | 1.185115000000  |        |        |  |
|                                | H                           | 2.291601000000  |         | -2.377845000000 |        | -0.331401000000 |        |        |  |
|                                | H                           | 3.868427000000  |         | -0.559943000000 |        | 0.365459000000  |        |        |  |
|                                | H                           | 3.089478000000  |         | -0.179774000000 |        | -1.166231000000 |        |        |  |
|                                | H                           | 2.254363000000  |         | 0.886692000000  |        | 1.573579000000  |        |        |  |
|                                | H                           | 3.054848000000  |         | 1.813205000000  |        | 0.311171000000  |        |        |  |
|                                | H                           | 0.629788000000  |         | -1.017016000000 |        | -1.575459000000 |        |        |  |
|                                | H                           | -1.197093000000 |         | 0.815347000000  |        | -1.600295000000 |        |        |  |
|                                | H                           | -1.694847000000 |         | 2.050897000000  |        | 1.130208000000  |        |        |  |
|                                | H                           | -3.339813000000 |         | -0.205775000000 |        | -0.996680000000 |        |        |  |
|                                | H                           | -2.062843000000 |         | -1.383956000000 |        | -1.205886000000 |        |        |  |
|                                | H                           | -2.785757000000 |         | 2.315944000000  |        | -0.345231000000 |        |        |  |
|                                | C                           | -2.722312000000 |         | -1.145081000000 |        | 0.839600000000  |        |        |  |
|                                | H                           | -3.501286000000 |         | -1.908298000000 |        | 0.788175000000  |        |        |  |
|                                | H                           | -1.839434000000 |         | -1.603309000000 |        | 1.292395000000  |        |        |  |
|                                | H                           | -3.069851000000 |         | -0.355448000000 |        | 1.510657000000  |        |        |  |
| frequencies                    | 80.1                        | 95.5            | 142.9   | 152.2           | 200.1  | 237.9           | 252.1  | 263.2  |  |
|                                | 327.0                       | 335.4           | 401.9   | 420.0           | 440.9  | 449.8           | 474.7  | 537.2  |  |
|                                | 596.9                       | 789.8           | 796.3   | 802.5           | 849.3  | 874.8           | 891.1  | 909.6  |  |
|                                | 937.0                       | 945.9           | 992.4   | 1012.1          | 1043.9 | 1061.5          | 1069.7 | 1082.1 |  |
|                                | 1098.1                      | 1125.9          | 1135.5  | 1157.0          | 1192.4 | 1222.0          | 1248.2 | 1278.4 |  |
|                                | 1290.7                      | 1295.4          | 1302.5  | 1317.9          | 1339.2 | 1367.3          | 1369.2 | 1379.4 |  |
|                                | 1383.6                      | 1386.3          | 1389.1  | 1411.2          | 1417.1 | 1465.8          | 1481.8 | 1487.1 |  |
|                                | 1488.6                      | 1494.2          | 1502.0  | 1505.3          | 1508.4 | 1515.3          | 2995.1 | 3009.1 |  |
|                                | 3023.2                      | 3031.3          | 3036.7  | 3040.1          | 3045.4 | 3059.1          | 3062.4 | 3093.1 |  |
|                                | 3093.8                      | 3094.9          | 3096.9  | 3099.4          | 3103.9 | 3129.0          | 3132.9 | 3159.9 |  |
|                                | 3263.2                      |                 |         |                 |        |                 |        |        |  |
| electronic state               | 2-A                         |                 |         |                 |        |                 |        |        |  |
| point group                    | C2                          |                 |         |                 |        |                 |        |        |  |
| rotational constants           | 2.25234                     | 0.83905         | 0.68430 |                 |        |                 |        |        |  |
| ZPE                            | 0.270169 (Hartree/Particle) |                 |         |                 |        |                 |        |        |  |
|                                |                             |                 |         |                 |        |                 |        |        |  |
| <i>s</i> BP4                   |                             |                 |         |                 |        |                 |        |        |  |
| optimized Cartesian coordinate | C                           | -0.532708000000 |         | 0.880074000000  |        | 0.763078000000  |        |        |  |
|                                | C                           | 0.009147000000  |         | -0.109109000000 |        | -0.288718000000 |        |        |  |
|                                | C                           | 1.379531000000  |         | -0.623398000000 |        | 0.053953000000  |        |        |  |

|                                |                             |                 |                 |                 |        |        |        |        |  |
|--------------------------------|-----------------------------|-----------------|-----------------|-----------------|--------|--------|--------|--------|--|
|                                | C                           | 2.544772000000  | -0.182140000000 | -0.775933000000 |        |        |        |        |  |
|                                | C                           | 2.937109000000  | 1.283937000000  | -0.509765000000 |        |        |        |        |  |
|                                | H                           | 3.191571000000  | 1.431549000000  | 0.542726000000  |        |        |        |        |  |
|                                | C                           | -1.004497000000 | -1.251193000000 | -0.495506000000 |        |        |        |        |  |
|                                | C                           | -2.389424000000 | -0.720101000000 | -0.872830000000 |        |        |        |        |  |
|                                | C                           | -2.907939000000 | 0.269153000000  | 0.172639000000  |        |        |        |        |  |
|                                | C                           | -1.914808000000 | 1.413866000000  | 0.380756000000  |        |        |        |        |  |
|                                | H                           | -0.630514000000 | -1.932210000000 | -1.265411000000 |        |        |        |        |  |
|                                | H                           | 0.081199000000  | 0.434807000000  | -1.242098000000 |        |        |        |        |  |
|                                | H                           | -0.601343000000 | 0.365552000000  | 1.729840000000  |        |        |        |        |  |
|                                | H                           | 0.175651000000  | 1.704271000000  | 0.893745000000  |        |        |        |        |  |
|                                | H                           | -2.327053000000 | -0.214820000000 | -1.844505000000 |        |        |        |        |  |
|                                | H                           | -3.091054000000 | -1.550194000000 | -0.992814000000 |        |        |        |        |  |
|                                | H                           | -3.884249000000 | 0.661011000000  | -0.125216000000 |        |        |        |        |  |
|                                | H                           | -3.052532000000 | -0.257022000000 | 1.124315000000  |        |        |        |        |  |
|                                | H                           | -1.833217000000 | 1.992736000000  | -0.547472000000 |        |        |        |        |  |
|                                | H                           | -2.279841000000 | 2.099750000000  | 1.150299000000  |        |        |        |        |  |
|                                | H                           | -1.080624000000 | -1.831540000000 | 0.432477000000  |        |        |        |        |  |
|                                | H                           | 2.303717000000  | -0.290549000000 | -1.840014000000 |        |        |        |        |  |
|                                | H                           | 3.408578000000  | -0.824912000000 | -0.578069000000 |        |        |        |        |  |
|                                | H                           | 3.798683000000  | 1.579289000000  | -1.113120000000 |        |        |        |        |  |
|                                | H                           | 2.108866000000  | 1.954414000000  | -0.752880000000 |        |        |        |        |  |
|                                | C                           | 1.639810000000  | -1.183340000000 | 1.416680000000  |        |        |        |        |  |
|                                | H                           | 2.472280000000  | -1.892404000000 | 1.398272000000  |        |        |        |        |  |
|                                | H                           | 1.908222000000  | -0.397671000000 | 2.140538000000  |        |        |        |        |  |
|                                | H                           | 0.765699000000  | -1.698552000000 | 1.823252000000  |        |        |        |        |  |
| frequencies                    | 50.8                        | 65.0            | 110.7           | 127.1           | 164.1  | 227.7  | 239.1  | 255.8  |  |
|                                | 283.0                       | 312.1           | 370.6           | 435.8           | 441.2  | 481.7  | 518.7  | 536.6  |  |
|                                | 773.5                       | 786.2           | 796.5           | 828.1           | 864.1  | 900.7  | 903.5  | 935.7  |  |
|                                | 943.9                       | 991.3           | 998.0           | 1022.6          | 1052.5 | 1055.7 | 1068.7 | 1076.1 |  |
|                                | 1092.0                      | 1116.2          | 1144.7          | 1201.8          | 1222.8 | 1253.8 | 1283.8 | 1290.6 |  |
|                                | 1297.6                      | 1327.2          | 1330.8          | 1354.7          | 1360.8 | 1365.6 | 1372.2 | 1385.9 |  |
|                                | 1386.5                      | 1397.4          | 1406.0          | 1415.8          | 1477.4 | 1481.4 | 1485.8 | 1487.9 |  |
|                                | 1489.8                      | 1493.0          | 1496.0          | 1502.8          | 1506.8 | 1510.3 | 2984.3 | 3009.9 |  |
|                                | 3036.0                      | 3036.3          | 3036.5          | 3041.9          | 3042.0 | 3045.8 | 3054.0 | 3075.3 |  |
|                                | 3081.3                      | 3088.4          | 3092.9          | 3094.3          | 3094.8 | 3099.8 | 3121.5 | 3128.3 |  |
|                                | 3130.1                      |                 |                 |                 |        |        |        |        |  |
| electronic state               | 2-A                         |                 |                 |                 |        |        |        |        |  |
| point group                    | C1                          |                 |                 |                 |        |        |        |        |  |
| rotational constants           | 2.24046                     | 0.76597         | 0.71023         |                 |        |        |        |        |  |
| ZPE                            | 0.270756 (Hartree/Particle) |                 |                 |                 |        |        |        |        |  |
|                                |                             |                 |                 |                 |        |        |        |        |  |
| sBP5                           |                             |                 |                 |                 |        |        |        |        |  |
| optimized Cartesian coordinate | C                           | 0.950306000000  | -1.150873000000 | -0.805950000000 |        |        |        |        |  |
|                                | C                           | -0.047726000000 | -0.302240000000 | -0.078085000000 |        |        |        |        |  |
|                                | C                           | -1.510739000000 | -0.621505000000 | -0.215780000000 |        |        |        |        |  |
|                                | C                           | -2.428730000000 | 0.585513000000  | 0.025888000000  |        |        |        |        |  |
|                                | C                           | -2.071755000000 | 1.793799000000  | -0.836024000000 |        |        |        |        |  |
|                                | H                           | -2.059171000000 | 1.520906000000  | -1.895024000000 |        |        |        |        |  |
|                                | C                           | 0.464459000000  | 0.411454000000  | 1.137822000000  |        |        |        |        |  |
|                                | C                           | 1.779292000000  | 1.151837000000  | 0.852602000000  |        |        |        |        |  |
|                                | C                           | 2.808217000000  | 0.219660000000  | 0.212113000000  |        |        |        |        |  |
|                                | C                           | 2.259227000000  | -0.395776000000 | -1.075609000000 |        |        |        |        |  |
|                                | H                           | -0.281294000000 | 1.108606000000  | 1.529609000000  |        |        |        |        |  |
|                                | H                           | 1.189853000000  | -2.043058000000 | -0.199356000000 |        |        |        |        |  |
|                                | H                           | 0.521591000000  | -1.522564000000 | -1.741826000000 |        |        |        |        |  |
|                                | H                           | 1.576420000000  | 1.984886000000  | 0.169567000000  |        |        |        |        |  |
|                                | H                           | 2.174282000000  | 1.580906000000  | 1.777413000000  |        |        |        |        |  |
|                                | H                           | 3.735503000000  | 0.761865000000  | 0.008260000000  |        |        |        |        |  |
|                                | H                           | 3.056445000000  | -0.582837000000 | 0.918293000000  |        |        |        |        |  |
|                                | H                           | 2.065400000000  | 0.402631000000  | -1.800818000000 |        |        |        |        |  |
|                                | H                           | 2.995383000000  | -1.069039000000 | -1.523114000000 |        |        |        |        |  |
|                                | H                           | 0.651535000000  | -0.322476000000 | 1.941958000000  |        |        |        |        |  |
|                                | H                           | -1.674857000000 | -0.952734000000 | -1.250062000000 |        |        |        |        |  |
|                                | H                           | -2.405470000000 | 0.859964000000  | 1.086217000000  |        |        |        |        |  |
|                                | H                           | -3.458265000000 | 0.275424000000  | -0.180586000000 |        |        |        |        |  |
|                                | H                           | -2.792186000000 | 2.603708000000  | -0.704429000000 |        |        |        |        |  |

|                                |                             |                 |         |                 |        |                 |        |        |
|--------------------------------|-----------------------------|-----------------|---------|-----------------|--------|-----------------|--------|--------|
|                                | H                           | -1.079116000000 |         | 2.176900000000  |        | -0.586346000000 |        |        |
|                                | C                           | -1.903478000000 |         | -1.784835000000 |        | 0.714798000000  |        |        |
|                                | H                           | -2.955965000000 |         | -2.050860000000 |        | 0.584120000000  |        |        |
|                                | H                           | -1.300016000000 |         | -2.673288000000 |        | 0.514717000000  |        |        |
|                                | H                           | -1.754515000000 |         | -1.501133000000 |        | 1.760769000000  |        |        |
| frequencies                    | 39.9                        | 57.0            | 128.2   | 188.1           | 193.1  | 223.9           | 229.7  | 247.5  |
|                                | 282.2                       | 318.8           | 381.8   | 427.9           | 439.7  | 478.4           | 491.1  | 583.6  |
|                                | 724.1                       | 791.3           | 802.7   | 843.0           | 856.7  | 872.0           | 917.6  | 930.7  |
|                                | 957.3                       | 979.6           | 1007.9  | 1028.9          | 1048.6 | 1077.1          | 1090.8 | 1095.1 |
|                                | 1100.1                      | 1116.8          | 1154.3  | 1173.4          | 1213.5 | 1253.9          | 1264.9 | 1288.5 |
|                                | 1297.9                      | 1311.9          | 1319.8  | 1353.3          | 1359.9 | 1365.3          | 1376.6 | 1386.2 |
|                                | 1397.0                      | 1400.2          | 1410.3  | 1415.3          | 1468.6 | 1476.7          | 1486.3 | 1490.3 |
|                                | 1495.1                      | 1499.5          | 1502.1  | 1503.7          | 1504.0 | 1508.5          | 2946.2 | 2952.4 |
|                                | 3023.3                      | 3035.8          | 3046.7  | 3048.2          | 3049.3 | 3053.2          | 3056.7 | 3078.8 |
|                                | 3083.7                      | 3095.4          | 3097.3  | 3097.7          | 3101.0 | 3120.2          | 3125.2 | 3128.8 |
|                                | 3133.5                      |                 |         |                 |        |                 |        |        |
| electronic state               | 2-A                         |                 |         |                 |        |                 |        |        |
| point group                    | C1                          |                 |         |                 |        |                 |        |        |
| rotational constants           | 1.93965                     | 0.86254         | 0.76179 |                 |        |                 |        |        |
| ZPE                            | 0.270877 (Hartree/Particle) |                 |         |                 |        |                 |        |        |
| <i>s</i> BP6                   |                             |                 |         |                 |        |                 |        |        |
| optimized Cartesian coordinate | C                           | -0.426139000000 |         | -0.689604000000 |        | -0.858627000000 |        |        |
|                                | C                           | -1.791288000000 |         | -1.294500000000 |        | -0.804251000000 |        |        |
|                                | C                           | -2.835470000000 |         | -0.274689000000 |        | -0.321738000000 |        |        |
|                                | C                           | -1.019723000000 |         | 1.090450000000  |        | 0.768892000000  |        |        |
|                                | C                           | 0.054282000000  |         | 0.074346000000  |        | 0.334952000000  |        |        |
|                                | H                           | -3.799872000000 |         | -0.767692000000 |        | -0.172682000000 |        |        |
|                                | H                           | -1.126422000000 |         | 1.861296000000  |        | -0.001631000000 |        |        |
|                                | H                           | -0.698508000000 |         | 1.589556000000  |        | 1.689351000000  |        |        |
|                                | H                           | -1.790060000000 |         | -2.139829000000 |        | -0.094907000000 |        |        |
|                                | H                           | -2.075164000000 |         | -1.706513000000 |        | -1.775280000000 |        |        |
|                                | H                           | 0.263226000000  |         | -0.986064000000 |        | -1.639571000000 |        |        |
|                                | H                           | 0.133870000000  |         | -0.636877000000 |        | 1.176864000000  |        |        |
|                                | H                           | -2.974961000000 |         | 0.485431000000  |        | -1.098487000000 |        |        |
|                                | C                           | -2.374943000000 |         | 0.408413000000  |        | 0.967366000000  |        |        |
|                                | H                           | -3.120207000000 |         | 1.139250000000  |        | 1.292898000000  |        |        |
|                                | H                           | -2.292580000000 |         | -0.339939000000 |        | 1.765510000000  |        |        |
|                                | C                           | 1.445467000000  |         | 0.711915000000  |        | 0.155423000000  |        |        |
|                                | H                           | 1.706976000000  |         | 1.158880000000  |        | 1.124380000000  |        |        |
|                                | C                           | 2.534688000000  |         | -0.321008000000 |        | -0.174627000000 |        |        |
|                                | H                           | 3.500458000000  |         | 0.194133000000  |        | -0.147041000000 |        |        |
|                                | H                           | 2.411358000000  |         | -0.664914000000 |        | -1.207708000000 |        |        |
|                                | C                           | 2.577918000000  |         | -1.525661000000 |        | 0.763161000000  |        |        |
|                                | H                           | 1.698868000000  |         | -2.162360000000 |        | 0.638150000000  |        |        |
|                                | H                           | 3.459901000000  |         | -2.139026000000 |        | 0.568709000000  |        |        |
|                                | H                           | 2.616002000000  |         | -1.206889000000 |        | 1.809044000000  |        |        |
|                                | C                           | 1.452682000000  |         | 1.822114000000  |        | -0.898638000000 |        |        |
|                                | H                           | 2.469993000000  |         | 2.187227000000  |        | -1.060898000000 |        |        |
|                                | H                           | 1.073390000000  |         | 1.449209000000  |        | -1.855041000000 |        |        |
|                                | H                           | 0.838888000000  |         | 2.674473000000  |        | -0.603142000000 |        |        |
| frequencies                    | 59.1                        | 92.6            | 126.2   | 178.5           | 200.9  | 213.6           | 229.8  | 286.1  |
|                                | 287.1                       | 309.5           | 346.2   | 403.0           | 436.1  | 464.6           | 480.9  | 579.7  |
|                                | 588.8                       | 766.6           | 801.4   | 827.8           | 849.1  | 879.4           | 906.8  | 939.1  |
|                                | 944.4                       | 978.8           | 1003.9  | 1028.1          | 1055.1 | 1071.4          | 1075.8 | 1083.8 |
|                                | 1120.0                      | 1123.7          | 1136.6  | 1170.9          | 1203.7 | 1219.1          | 1263.1 | 1271.7 |
|                                | 1291.1                      | 1310.9          | 1322.3  | 1334.1          | 1352.0 | 1357.1          | 1372.5 | 1378.9 |
|                                | 1389.1                      | 1391.6          | 1411.9  | 1414.0          | 1424.2 | 1473.6          | 1486.5 | 1490.7 |
|                                | 1493.8                      | 1501.1          | 1502.8  | 1504.2          | 1511.3 | 1515.4          | 2945.8 | 2964.3 |
|                                | 3022.2                      | 3037.8          | 3047.1  | 3049.9          | 3050.1 | 3055.0          | 3055.7 | 3082.7 |
|                                | 3090.7                      | 3096.6          | 3100.2  | 3102.3          | 3120.4 | 3124.4          | 3133.1 | 3139.7 |
|                                | 3206.7                      |                 |         |                 |        |                 |        |        |
| electronic state               | 2-A                         |                 |         |                 |        |                 |        |        |
| point group                    | C1                          |                 |         |                 |        |                 |        |        |
| rotational constants           | 2.06265                     | 0.83338         | 0.73690 |                 |        |                 |        |        |

|                                |                             |                 |                 |                 |        |        |        |        |
|--------------------------------|-----------------------------|-----------------|-----------------|-----------------|--------|--------|--------|--------|
| ZPE                            | 0.270320 (Hartree/Particle) |                 |                 |                 |        |        |        |        |
|                                |                             |                 |                 |                 |        |        |        |        |
| sBP7                           |                             |                 |                 |                 |        |        |        |        |
| optimized Cartesian coordinate | C                           | -1.799929000000 | -1.286009000000 | -0.763684000000 |        |        |        |        |
|                                | C                           | -0.422041000000 | -0.731457000000 | -0.932465000000 |        |        |        |        |
|                                | C                           | 0.020503000000  | 0.065594000000  | 0.309785000000  |        |        |        |        |
|                                | C                           | -2.397694000000 | 0.415748000000  | 0.967020000000  |        |        |        |        |
|                                | C                           | -2.876458000000 | -0.386523000000 | -0.252482000000 |        |        |        |        |
|                                | H                           | -2.280069000000 | -0.261861000000 | 1.819692000000  |        |        |        |        |
|                                | H                           | -3.149711000000 | 1.159266000000  | 1.244504000000  |        |        |        |        |
|                                | H                           | -0.399489000000 | -0.056632000000 | -1.805670000000 |        |        |        |        |
|                                | H                           | 0.283885000000  | -1.537366000000 | -1.149201000000 |        |        |        |        |
|                                | H                           | -2.062428000000 | -2.219930000000 | -1.245454000000 |        |        |        |        |
|                                | H                           | -3.162880000000 | 0.332372000000  | -1.039720000000 |        |        |        |        |
|                                | H                           | -3.778095000000 | -0.955399000000 | -0.013351000000 |        |        |        |        |
|                                | H                           | 0.064131000000  | -0.646382000000 | 1.144303000000  |        |        |        |        |
|                                | C                           | -1.058750000000 | 1.093173000000  | 0.670975000000  |        |        |        |        |
|                                | H                           | -1.195974000000 | 1.791586000000  | -0.163724000000 |        |        |        |        |
|                                | H                           | -0.730717000000 | 1.685625000000  | 1.532002000000  |        |        |        |        |
|                                | C                           | 1.421591000000  | 0.697417000000  | 0.181381000000  |        |        |        |        |
|                                | H                           | 1.661029000000  | 1.104210000000  | 1.174150000000  |        |        |        |        |
|                                | C                           | 2.509921000000  | -0.332189000000 | -0.156823000000 |        |        |        |        |
|                                | H                           | 2.377437000000  | -0.675223000000 | -1.189427000000 |        |        |        |        |
|                                | H                           | 3.476541000000  | 0.181665000000  | -0.135028000000 |        |        |        |        |
|                                | C                           | 2.560975000000  | -1.532729000000 | 0.786405000000  |        |        |        |        |
|                                | H                           | 1.675598000000  | -2.165167000000 | 0.689410000000  |        |        |        |        |
|                                | H                           | 3.434447000000  | -2.154428000000 | 0.580193000000  |        |        |        |        |
|                                | H                           | 2.621938000000  | -1.205398000000 | 1.828474000000  |        |        |        |        |
|                                | C                           | 1.481673000000  | 1.856888000000  | -0.817171000000 |        |        |        |        |
|                                | H                           | 0.821570000000  | 2.678429000000  | -0.533950000000 |        |        |        |        |
|                                | H                           | 2.498464000000  | 2.254144000000  | -0.870834000000 |        |        |        |        |
|                                | H                           | 1.205569000000  | 1.531016000000  | -1.824012000000 |        |        |        |        |
| frequencies                    | 72.4                        | 98.0            | 148.6           | 182.8           | 205.7  | 208.7  | 239.3  | 272.2  |
|                                | 296.7                       | 318.8           | 370.7           | 398.8           | 427.6  | 470.5  | 480.4  | 547.7  |
|                                | 615.0                       | 768.2           | 803.1           | 836.9           | 856.4  | 864.8  | 904.6  | 930.0  |
|                                | 946.9                       | 977.2           | 990.4           | 1028.9          | 1049.9 | 1070.4 | 1074.7 | 1105.7 |
|                                | 1110.2                      | 1131.4          | 1136.5          | 1171.4          | 1205.6 | 1226.3 | 1252.5 | 1286.5 |
|                                | 1292.9                      | 1313.0          | 1331.1          | 1337.5          | 1359.2 | 1360.8 | 1368.9 | 1389.4 |
|                                | 1389.9                      | 1404.3          | 1407.2          | 1416.1          | 1419.1 | 1469.5 | 1473.8 | 1490.5 |
|                                | 1496.0                      | 1499.3          | 1505.9          | 1506.8          | 1512.2 | 1515.0 | 2958.7 | 2965.4 |
|                                | 3012.9                      | 3032.6          | 3040.8          | 3047.9          | 3050.7 | 3056.6 | 3060.0 | 3080.9 |
|                                | 3084.2                      | 3097.0          | 3097.3          | 3100.4          | 3122.7 | 3124.9 | 3133.8 | 3140.3 |
|                                | 3200.5                      |                 |                 |                 |        |        |        |        |
| electronic state               | 2-A                         |                 |                 |                 |        |        |        |        |
| point group                    | C1                          |                 |                 |                 |        |        |        |        |
| rotational constants           | 2.06913                     | 0.83686         | 0.73301         |                 |        |        |        |        |
| ZPE                            | 0.270529 (Hartree/Particle) |                 |                 |                 |        |        |        |        |
|                                |                             |                 |                 |                 |        |        |        |        |
| sBP8                           |                             |                 |                 |                 |        |        |        |        |
| optimized Cartesian coordinate | C                           | -2.829311000000 | -0.372717000000 | 0.195876000000  |        |        |        |        |
|                                | C                           | -1.820221000000 | -1.330378000000 | 0.737801000000  |        |        |        |        |
|                                | C                           | -0.458506000000 | -0.654924000000 | 0.969491000000  |        |        |        |        |
|                                | C                           | -0.005882000000 | 0.109406000000  | -0.280946000000 |        |        |        |        |
|                                | C                           | 1.415836000000  | 0.698624000000  | -0.178818000000 |        |        |        |        |
|                                | C                           | 2.486529000000  | -0.364551000000 | 0.110680000000  |        |        |        |        |
|                                | C                           | 2.457295000000  | -1.568674000000 | -0.828655000000 |        |        |        |        |
|                                | H                           | 2.465772000000  | -1.247375000000 | -1.874383000000 |        |        |        |        |
|                                | C                           | -1.052583000000 | 1.172126000000  | -0.636367000000 |        |        |        |        |
|                                | C                           | -2.419226000000 | 0.531242000000  | -0.919785000000 |        |        |        |        |
|                                | H                           | 0.277530000000  | -1.413440000000 | 1.250707000000  |        |        |        |        |
|                                | H                           | 0.006291000000  | -0.608440000000 | -1.113662000000 |        |        |        |        |
|                                | H                           | -1.163021000000 | 1.870483000000  | 0.200035000000  |        |        |        |        |
|                                | H                           | -0.719462000000 | 1.752275000000  | -1.503663000000 |        |        |        |        |
|                                | H                           | -1.669705000000 | -2.154029000000 | 0.017769000000  |        |        |        |        |
|                                | H                           | -2.180453000000 | -1.793515000000 | 1.659670000000  |        |        |        |        |
|                                | H                           | -3.880656000000 | -0.521850000000 | 0.409890000000  |        |        |        |        |

|                                |                             |                 |                 |                 |        |        |        |        |
|--------------------------------|-----------------------------|-----------------|-----------------|-----------------|--------|--------|--------|--------|
|                                | H                           | -2.340645000000 | -0.046194000000 | -1.857127000000 |        |        |        |        |
|                                | H                           | -3.176414000000 | 1.299376000000  | -1.095168000000 |        |        |        |        |
|                                | H                           | -0.544868000000 | 0.041404000000  | 1.811165000000  |        |        |        |        |
|                                | H                           | 1.641098000000  | 1.120193000000  | -1.168664000000 |        |        |        |        |
|                                | H                           | 2.393413000000  | -0.702118000000 | 1.149116000000  |        |        |        |        |
|                                | H                           | 3.465718000000  | 0.120601000000  | 0.042258000000  |        |        |        |        |
|                                | H                           | 3.326585000000  | -2.209608000000 | -0.669015000000 |        |        |        |        |
|                                | H                           | 1.564695000000  | -2.180393000000 | -0.676982000000 |        |        |        |        |
|                                | C                           | 1.530057000000  | 1.831540000000  | 0.844989000000  |        |        |        |        |
|                                | H                           | 0.884946000000  | 2.676545000000  | 0.598736000000  |        |        |        |        |
|                                | H                           | 1.267482000000  | 1.484637000000  | 1.848473000000  |        |        |        |        |
|                                | H                           | 2.557773000000  | 2.201288000000  | 0.885244000000  |        |        |        |        |
| frequencies                    | 66.0                        | 92.6            | 142.9           | 202.8           | 205.9  | 221.4  | 223.8  | 261.3  |
|                                | 290.3                       | 305.1           | 372.8           | 406.8           | 433.4  | 453.4  | 485.4  | 555.8  |
|                                | 638.4                       | 778.8           | 787.1           | 809.8           | 841.8  | 888.1  | 917.8  | 940.9  |
|                                | 951.7                       | 977.2           | 1004.9          | 1022.6          | 1042.7 | 1063.7 | 1077.2 | 1091.2 |
|                                | 1114.7                      | 1129.5          | 1135.9          | 1175.0          | 1204.3 | 1231.8 | 1245.1 | 1290.3 |
|                                | 1298.8                      | 1315.4          | 1319.9          | 1336.9          | 1345.6 | 1363.4 | 1377.6 | 1388.5 |
|                                | 1398.6                      | 1403.9          | 1408.1          | 1415.6          | 1420.8 | 1470.9 | 1478.5 | 1484.3 |
|                                | 1496.2                      | 1497.4          | 1506.1          | 1507.7          | 1510.1 | 1515.0 | 2953.1 | 2961.2 |
|                                | 3011.6                      | 3021.6          | 3046.4          | 3048.7          | 3051.6 | 3055.9 | 3060.8 | 3081.5 |
|                                | 3091.6                      | 3095.0          | 3095.8          | 3101.7          | 3122.9 | 3124.4 | 3132.1 | 3139.6 |
|                                | 3202.0                      |                 |                 |                 |        |        |        |        |
| electronic state               | 2-A                         |                 |                 |                 |        |        |        |        |
| point group                    | C1                          |                 |                 |                 |        |        |        |        |
| rotational constants           | 2.01356                     | 0.85656         | 0.74076         |                 |        |        |        |        |
| ZPE                            | 0.270504 (Hartree/Particle) |                 |                 |                 |        |        |        |        |
|                                |                             |                 |                 |                 |        |        |        |        |
| TS <sub>e</sub> γ              |                             |                 |                 |                 |        |        |        |        |
| optimized Cartesian coordinate | C                           | -0.592007000000 | -0.350972000000 | -0.984319000000 |        |        |        |        |
|                                | C                           | -0.446856000000 | 0.533086000000  | 0.260509000000  |        |        |        |        |
|                                | C                           | 0.553096000000  | 1.693028000000  | 0.087416000000  |        |        |        |        |
|                                | C                           | 2.002380000000  | 1.203774000000  | -0.045473000000 |        |        |        |        |
|                                | C                           | 2.505867000000  | 0.396892000000  | 1.121873000000  |        |        |        |        |
|                                | H                           | 2.060824000000  | -0.838633000000 | 0.937100000000  |        |        |        |        |
|                                | O                           | 1.740627000000  | -1.934734000000 | 0.598596000000  |        |        |        |        |
|                                | O                           | 2.261989000000  | -2.061818000000 | -0.681257000000 |        |        |        |        |
|                                | H                           | 3.082661000000  | -2.552574000000 | -0.543688000000 |        |        |        |        |
|                                | C                           | -1.830288000000 | 1.012049000000  | 0.717759000000  |        |        |        |        |
|                                | C                           | -2.749702000000 | -0.175275000000 | 1.016751000000  |        |        |        |        |
|                                | C                           | -2.872743000000 | -1.096777000000 | -0.199470000000 |        |        |        |        |
|                                | C                           | -1.496505000000 | -1.550469000000 | -0.692105000000 |        |        |        |        |
|                                | H                           | -1.731738000000 | 1.648527000000  | 1.603893000000  |        |        |        |        |
|                                | H                           | -0.062560000000 | -0.109522000000 | 1.064572000000  |        |        |        |        |
|                                | H                           | -1.034364000000 | 0.240137000000  | -1.796560000000 |        |        |        |        |
|                                | H                           | 0.382986000000  | -0.702607000000 | -1.329756000000 |        |        |        |        |
|                                | H                           | -2.335745000000 | -0.744584000000 | 1.857821000000  |        |        |        |        |
|                                | H                           | -3.736848000000 | 0.178351000000  | 1.327542000000  |        |        |        |        |
|                                | H                           | -3.496186000000 | -1.961979000000 | 0.042773000000  |        |        |        |        |
|                                | H                           | -3.381274000000 | -0.554801000000 | -1.006751000000 |        |        |        |        |
|                                | H                           | -1.013870000000 | -2.171185000000 | 0.071733000000  |        |        |        |        |
|                                | H                           | -1.600279000000 | -2.170202000000 | -1.586981000000 |        |        |        |        |
|                                | H                           | -2.289144000000 | 1.625295000000  | -0.067343000000 |        |        |        |        |
|                                | H                           | 0.501122000000  | 2.292694000000  | 1.007072000000  |        |        |        |        |
|                                | H                           | 2.656272000000  | 2.079639000000  | -0.165365000000 |        |        |        |        |
|                                | H                           | 2.124820000000  | 0.623779000000  | -0.969418000000 |        |        |        |        |
|                                | H                           | 3.581375000000  | 0.221288000000  | 1.144069000000  |        |        |        |        |
|                                | H                           | 2.100926000000  | 0.658979000000  | 2.100431000000  |        |        |        |        |
|                                | C                           | 0.218434000000  | 2.611637000000  | -1.090593000000 |        |        |        |        |
|                                | H                           | -0.808470000000 | 2.978487000000  | -1.042993000000 |        |        |        |        |
|                                | H                           | 0.881161000000  | 3.480668000000  | -1.098951000000 |        |        |        |        |
|                                | H                           | 0.347343000000  | 2.088804000000  | -2.042018000000 |        |        |        |        |
| frequencies                    | -1823.8                     | 49.0            | 75.3            | 79.1            | 104.8  | 127.5  | 145.5  | 203.3  |
|                                | 218.6                       | 242.2           | 253.3           | 270.5           | 287.2  | 346.9  | 397.3  | 402.6  |
|                                | 446.5                       | 451.6           | 465.9           | 514.4           | 567.8  | 575.6  | 582.0  | 773.5  |
|                                | 803.2                       | 825.0           | 847.6           | 863.8           | 897.6  | 909.1  | 939.8  | 949.3  |
|                                | 984.4                       | 1009.3          | 1022.9          | 1053.1          | 1057.8 | 1071.0 | 1084.4 | 1086.0 |



|                                |                             |                 |         |                 |        |                 |        |        |  |
|--------------------------------|-----------------------------|-----------------|---------|-----------------|--------|-----------------|--------|--------|--|
|                                | 1100.2                      | 1117.5          | 1141.3  | 1176.4          | 1182.8 | 1204.4          | 1215.5 | 1264.6 |  |
|                                | 1270.6                      | 1293.5          | 1303.6  | 1318.1          | 1330.5 | 1346.4          | 1359.6 | 1371.1 |  |
|                                | 1384.4                      | 1385.5          | 1389.5  | 1401.9          | 1406.4 | 1412.8          | 1423.7 | 1454.8 |  |
|                                | 1470.3                      | 1476.7          | 1484.9  | 1489.5          | 1492.5 | 1498.1          | 1506.2 | 1508.3 |  |
|                                | 1512.7                      | 3011.0          | 3014.9  | 3028.7          | 3035.0 | 3035.4          | 3041.9 | 3042.8 |  |
|                                | 3051.5                      | 3055.1          | 3059.6  | 3082.0          | 3092.0 | 3094.2          | 3094.7 | 3100.4 |  |
|                                | 3118.0                      | 3124.2          | 3140.6  | 3176.8          | 3818.9 |                 |        |        |  |
| electronic state               | 2-A                         |                 |         |                 |        |                 |        |        |  |
| point group                    | C1                          |                 |         |                 |        |                 |        |        |  |
| rotational constants           | 1.01051                     | 0.68664         | 0.50025 |                 |        |                 |        |        |  |
| ZPE                            | 0.295927 (Hartree/Particle) |                 |         |                 |        |                 |        |        |  |
| TS <sub>β</sub> (S)            |                             |                 |         |                 |        |                 |        |        |  |
| optimized Cartesian coordinate | C                           | 0.965908000000  |         | 0.861060000000  |        | 0.775422000000  |        |        |  |
|                                | C                           | 0.616999000000  |         | -0.607932000000 |        | 0.498286000000  |        |        |  |
|                                | C                           | -0.896222000000 |         | -0.908606000000 |        | 0.586335000000  |        |        |  |
|                                | C                           | -1.701599000000 |         | -0.523031000000 |        | -0.639915000000 |        |        |  |
|                                | C                           | -3.204032000000 |         | -0.616897000000 |        | -0.520539000000 |        |        |  |
|                                | H                           | -1.552571000000 |         | 0.769986000000  |        | -0.828959000000 |        |        |  |
|                                | O                           | -1.646070000000 |         | 1.972957000000  |        | -0.837243000000 |        |        |  |
|                                | O                           | -2.026378000000 |         | 2.279423000000  |        | 0.460299000000  |        |        |  |
|                                | H                           | -1.184754000000 |         | 2.443761000000  |        | 0.908888000000  |        |        |  |
|                                | C                           | 1.265417000000  |         | -1.046698000000 |        | -0.820900000000 |        |        |  |
|                                | C                           | 2.783795000000  |         | -0.855684000000 |        | -0.778850000000 |        |        |  |
|                                | C                           | 3.142297000000  |         | 0.600786000000  |        | -0.476232000000 |        |        |  |
|                                | C                           | 2.482382000000  |         | 1.071191000000  |        | 0.821832000000  |        |        |  |
|                                | H                           | 1.020985000000  |         | -2.090328000000 |        | -1.042561000000 |        |        |  |
|                                | H                           | 1.090265000000  |         | -1.193257000000 |        | 1.299923000000  |        |        |  |
|                                | H                           | 0.545105000000  |         | 1.490559000000  |        | -0.018257000000 |        |        |  |
|                                | H                           | 0.519754000000  |         | 1.166496000000  |        | 1.729872000000  |        |        |  |
|                                | H                           | 3.208118000000  |         | -1.502609000000 |        | -0.001492000000 |        |        |  |
|                                | H                           | 3.228886000000  |         | -1.165906000000 |        | -1.727936000000 |        |        |  |
|                                | H                           | 4.227087000000  |         | 0.721841000000  |        | -0.415558000000 |        |        |  |
|                                | H                           | 2.796497000000  |         | 1.232965000000  |        | -1.302973000000 |        |        |  |
|                                | H                           | 2.897504000000  |         | 0.503564000000  |        | 1.663473000000  |        |        |  |
|                                | H                           | 2.712895000000  |         | 2.124159000000  |        | 1.004639000000  |        |        |  |
|                                | H                           | 0.860851000000  |         | -0.439908000000 |        | -1.640165000000 |        |        |  |
|                                | H                           | -1.297388000000 |         | -0.335733000000 |        | 1.434005000000  |        |        |  |
|                                | H                           | -1.311190000000 |         | -0.932219000000 |        | -1.574951000000 |        |        |  |
|                                | H                           | -3.692739000000 |         | -0.150486000000 |        | -1.377342000000 |        |        |  |
|                                | H                           | -3.534839000000 |         | -1.660345000000 |        | -0.477826000000 |        |        |  |
|                                | H                           | -3.548618000000 |         | -0.111030000000 |        | 0.385136000000  |        |        |  |
|                                | C                           | -1.129944000000 |         | -2.400498000000 |        | 0.897936000000  |        |        |  |
|                                | H                           | -0.809603000000 |         | -3.030117000000 |        | 0.063273000000  |        |        |  |
|                                | H                           | -0.563127000000 |         | -2.695163000000 |        | 1.784086000000  |        |        |  |
|                                | H                           | -2.183539000000 |         | -2.607408000000 |        | 1.090025000000  |        |        |  |
| frequencies                    | -1800.6                     | 29.3            | 70.0    | 86.4            | 104.2  | 116.5           | 161.8  | 180.8  |  |
|                                | 198.1                       | 202.4           | 244.0   | 256.4           | 299.2  | 314.0           | 362.4  | 370.9  |  |
|                                | 412.1                       | 427.2           | 456.5   | 484.3           | 513.5  | 593.4           | 623.8  | 785.2  |  |
|                                | 811.1                       | 846.3           | 865.9   | 871.1           | 908.5  | 916.8           | 940.8  | 956.7  |  |
|                                | 980.2                       | 1024.5          | 1033.2  | 1055.5          | 1065.9 | 1070.4          | 1087.4 | 1091.4 |  |
|                                | 1107.7                      | 1127.3          | 1146.1  | 1165.0          | 1185.1 | 1193.3          | 1218.5 | 1270.2 |  |
|                                | 1294.1                      | 1296.8          | 1310.6  | 1320.4          | 1335.9 | 1350.1          | 1369.3 | 1385.3 |  |
|                                | 1387.7                      | 1390.6          | 1399.8  | 1401.6          | 1409.1 | 1421.4          | 1423.1 | 1467.9 |  |
|                                | 1487.1                      | 1488.5          | 1490.1  | 1491.9          | 1494.3 | 1501.0          | 1503.8 | 1513.2 |  |
|                                | 1525.0                      | 3009.2          | 3023.0  | 3028.3          | 3039.0 | 3039.3          | 3043.2 | 3044.8 |  |
|                                | 3047.5                      | 3059.2          | 3079.8  | 3090.6          | 3097.5 | 3098.0          | 3102.5 | 3105.5 |  |
|                                | 3114.8                      | 3129.6          | 3142.6  | 3146.1          | 3793.1 |                 |        |        |  |
| electronic state               | 2-A                         |                 |         |                 |        |                 |        |        |  |
| point group                    | C1                          |                 |         |                 |        |                 |        |        |  |
| rotational constants           | 1.14444                     | 0.60582         | 0.47236 |                 |        |                 |        |        |  |
| ZPE                            | 0.295987 (Hartree/Particle) |                 |         |                 |        |                 |        |        |  |
| TS <sub>β</sub> (P)            |                             |                 |         |                 |        |                 |        |        |  |

|                                |                             |                 |                 |                 |        |        |        |        |       |
|--------------------------------|-----------------------------|-----------------|-----------------|-----------------|--------|--------|--------|--------|-------|
| optimized Cartesian coordinate | C                           | 0.533861000000  | -0.533951000000 | -0.739692000000 |        |        |        |        |       |
|                                | C                           | 0.511566000000  | 0.722359000000  | 0.140307000000  |        |        |        |        |       |
|                                | C                           | -0.879672000000 | 1.038088000000  | 0.718947000000  |        |        |        |        |       |
|                                | C                           | -1.481623000000 | -0.111164000000 | 1.494467000000  |        |        |        |        |       |
|                                | C                           | -1.890364000000 | 1.540679000000  | -0.329782000000 |        |        |        |        |       |
|                                | H                           | -2.008300000000 | -0.966152000000 | 0.613593000000  |        |        |        |        |       |
|                                | O                           | -2.500801000000 | -1.702172000000 | -0.175172000000 |        |        |        |        |       |
|                                | O                           | -1.799886000000 | -2.892396000000 | -0.055237000000 |        |        |        |        |       |
|                                | H                           | -1.155497000000 | -2.843633000000 | -0.774321000000 |        |        |        |        |       |
|                                | C                           | 1.586284000000  | 0.607337000000  | 1.229381000000  |        |        |        |        |       |
|                                | C                           | 2.974167000000  | 0.391007000000  | 0.620391000000  |        |        |        |        |       |
|                                | C                           | 2.994899000000  | -0.842574000000 | -0.284576000000 |        |        |        |        |       |
|                                | C                           | 1.914651000000  | -0.750038000000 | -1.364427000000 |        |        |        |        |       |
|                                | H                           | 1.581333000000  | 1.509510000000  | 1.849568000000  |        |        |        |        |       |
|                                | H                           | 0.800933000000  | 1.572927000000  | -0.490086000000 |        |        |        |        |       |
|                                | H                           | 0.294070000000  | -1.398869000000 | -0.106547000000 |        |        |        |        |       |
|                                | H                           | -0.236213000000 | -0.473671000000 | -1.516033000000 |        |        |        |        |       |
|                                | H                           | 3.247822000000  | 1.274336000000  | 0.030639000000  |        |        |        |        |       |
|                                | H                           | 3.722723000000  | 0.294213000000  | 1.411226000000  |        |        |        |        |       |
|                                | H                           | 3.980749000000  | -0.962763000000 | -0.741428000000 |        |        |        |        |       |
|                                | H                           | 2.815425000000  | -1.736956000000 | 0.324741000000  |        |        |        |        |       |
|                                | H                           | 2.141672000000  | 0.088875000000  | -2.033336000000 |        |        |        |        |       |
|                                | H                           | 1.916405000000  | -1.653595000000 | -1.980646000000 |        |        |        |        |       |
|                                | H                           | 1.354770000000  | -0.235525000000 | 1.892330000000  |        |        |        |        |       |
|                                | H                           | -0.737734000000 | 1.864522000000  | 1.436245000000  |        |        |        |        |       |
|                                | H                           | -0.804366000000 | -0.759242000000 | 2.050091000000  |        |        |        |        |       |
|                                | H                           | -2.834575000000 | 1.737133000000  | 0.188943000000  |        |        |        |        |       |
|                                | H                           | -2.379838000000 | 0.137690000000  | 2.059849000000  |        |        |        |        |       |
|                                | C                           | -1.455106000000 | 2.801587000000  | -1.073353000000 |        |        |        |        |       |
|                                | H                           | -2.279239000000 | 3.201782000000  | -1.666778000000 |        |        |        |        |       |
|                                | H                           | -1.136974000000 | 3.580549000000  | -0.374254000000 |        |        |        |        |       |
|                                | H                           | -0.626940000000 | 2.607115000000  | -1.757660000000 |        |        |        |        |       |
|                                | H                           | -2.102706000000 | 0.738307000000  | -1.042847000000 |        |        |        |        |       |
|                                | frequencies                 | -1872.7         | 33.9            | 58.9            | 74.1   | 95.7   | 102.3  | 128.9  | 181.5 |
|                                | 199.2                       | 227.6           | 239.2           | 268.4           | 281.2  | 350.2  | 392.9  | 417.1  |       |
|                                | 441.7                       | 445.9           | 474.6           | 508.9           | 532.4  | 599.3  | 639.5  | 772.7  |       |
|                                | 802.2                       | 809.7           | 840.5           | 864.9           | 899.7  | 908.3  | 937.0  | 945.4  |       |
|                                | 962.8                       | 1016.0          | 1027.9          | 1052.6          | 1057.3 | 1069.6 | 1079.4 | 1085.4 |       |
|                                | 1095.8                      | 1114.8          | 1144.4          | 1153.0          | 1193.6 | 1214.3 | 1224.0 | 1263.5 |       |
|                                | 1281.0                      | 1292.1          | 1300.9          | 1305.7          | 1331.5 | 1346.2 | 1359.9 | 1371.9 |       |
|                                | 1381.9                      | 1385.9          | 1388.7          | 1395.7          | 1405.8 | 1410.3 | 1419.8 | 1455.1 |       |
|                                | 1467.2                      | 1485.7          | 1489.0          | 1492.6          | 1497.7 | 1501.4 | 1504.8 | 1513.7 |       |
|                                | 1516.9                      | 2968.0          | 3027.2          | 3035.1          | 3037.8 | 3042.5 | 3044.3 | 3047.0 |       |
|                                | 3056.9                      | 3058.9          | 3084.7          | 3087.9          | 3093.4 | 3097.1 | 3097.5 | 3101.4 |       |
|                                | 3104.7                      | 3128.3          | 3136.3          | 3185.8          | 3806.2 |        |        |        |       |
| electronic state               | 2-A                         |                 |                 |                 |        |        |        |        |       |
| point group                    | C1                          |                 |                 |                 |        |        |        |        |       |
| rotational constants           | 0.92142                     | 0.64290         | 0.47986         |                 |        |        |        |        |       |
| ZPE                            | 0.295639 (Hartree/Particle) |                 |                 |                 |        |        |        |        |       |
| TS <sub>c</sub> $\alpha$       |                             |                 |                 |                 |        |        |        |        |       |
| optimized Cartesian coordinate | C                           | -1.488949000000 | 1.068822000000  | 0.558813000000  |        |        |        |        |       |
|                                | C                           | -0.511350000000 | 0.070550000000  | -0.091185000000 |        |        |        |        |       |
|                                | C                           | 0.889607000000  | 0.176229000000  | 0.496696000000  |        |        |        |        |       |
|                                | C                           | 1.596486000000  | 1.510095000000  | 0.320588000000  |        |        |        |        |       |
|                                | C                           | 1.489026000000  | 2.114323000000  | -1.077623000000 |        |        |        |        |       |
|                                | H                           | 1.576109000000  | -0.588126000000 | -0.267453000000 |        |        |        |        |       |
|                                | H                           | 0.464990000000  | 2.409286000000  | -1.318734000000 |        |        |        |        |       |
|                                | O                           | 2.389781000000  | -1.270569000000 | -0.917247000000 |        |        |        |        |       |
|                                | O                           | 3.599668000000  | -1.010460000000 | -0.292749000000 |        |        |        |        |       |
|                                | H                           | 3.709462000000  | -1.758672000000 | 0.308444000000  |        |        |        |        |       |
|                                | C                           | -1.093124000000 | -1.346730000000 | -0.021869000000 |        |        |        |        |       |
|                                | C                           | -2.457799000000 | -1.414233000000 | -0.710339000000 |        |        |        |        |       |
|                                | C                           | -3.433761000000 | -0.416289000000 | -0.083066000000 |        |        |        |        |       |
|                                | C                           | -2.863770000000 | 1.003300000000  | -0.111951000000 |        |        |        |        |       |
|                                | H                           | -0.393264000000 | -2.056282000000 | -0.475199000000 |        |        |        |        |       |
|                                | H                           | -0.439443000000 | 0.336196000000  | -1.154415000000 |        |        |        |        |       |

|                                |                             |                 |                 |                 |        |        |        |        |  |
|--------------------------------|-----------------------------|-----------------|-----------------|-----------------|--------|--------|--------|--------|--|
|                                | H                           | -1.591343000000 | 0.827201000000  | 1.624271000000  |        |        |        |        |  |
|                                | H                           | -1.089677000000 | 2.085411000000  | 0.497510000000  |        |        |        |        |  |
|                                | H                           | -2.337189000000 | -1.183134000000 | -1.775453000000 |        |        |        |        |  |
|                                | H                           | -2.860866000000 | -2.428580000000 | -0.649882000000 |        |        |        |        |  |
|                                | H                           | -4.396822000000 | -0.448066000000 | -0.599437000000 |        |        |        |        |  |
|                                | H                           | -3.621384000000 | -0.706030000000 | 0.958208000000  |        |        |        |        |  |
|                                | H                           | -2.765939000000 | 1.330623000000  | -1.154263000000 |        |        |        |        |  |
|                                | H                           | -3.551818000000 | 1.699722000000  | 0.375169000000  |        |        |        |        |  |
|                                | H                           | -1.216389000000 | -1.639744000000 | 1.027670000000  |        |        |        |        |  |
|                                | H                           | 2.652572000000  | 1.360139000000  | 0.568398000000  |        |        |        |        |  |
|                                | H                           | 1.207402000000  | 2.214889000000  | 1.070007000000  |        |        |        |        |  |
|                                | H                           | 2.117436000000  | 3.002691000000  | -1.159672000000 |        |        |        |        |  |
|                                | H                           | 1.822952000000  | 1.393443000000  | -1.828322000000 |        |        |        |        |  |
|                                | C                           | 1.096758000000  | -0.419062000000 | 1.873896000000  |        |        |        |        |  |
|                                | H                           | 2.141504000000  | -0.315102000000 | 2.177708000000  |        |        |        |        |  |
|                                | H                           | 0.487702000000  | 0.107005000000  | 2.619864000000  |        |        |        |        |  |
|                                | H                           | 0.829663000000  | -1.476668000000 | 1.911793000000  |        |        |        |        |  |
| frequencies                    | -1651.4                     | 24.6            | 60.0            | 65.8            | 98.7   | 107.6  | 156.3  | 183.5  |  |
|                                | 187.8                       | 211.5           | 229.6           | 247.4           | 291.2  | 296.2  | 350.5  | 383.4  |  |
|                                | 403.6                       | 420.9           | 446.1           | 461.5           | 502.0  | 526.8  | 644.6  | 765.8  |  |
|                                | 801.5                       | 805.3           | 837.1           | 864.4           | 905.0  | 908.8  | 940.6  | 952.1  |  |
|                                | 984.5                       | 1016.3          | 1033.3          | 1054.7          | 1068.4 | 1081.1 | 1088.0 | 1095.7 |  |
|                                | 1111.9                      | 1122.7          | 1155.4          | 1165.6          | 1199.3 | 1229.4 | 1252.9 | 1274.8 |  |
|                                | 1294.3                      | 1299.7          | 1302.4          | 1334.6          | 1349.7 | 1364.4 | 1373.4 | 1382.2 |  |
|                                | 1385.0                      | 1388.5          | 1401.7          | 1406.7          | 1409.0 | 1418.2 | 1466.9 | 1474.8 |  |
|                                | 1484.7                      | 1487.6          | 1490.6          | 1491.0          | 1496.8 | 1505.0 | 1507.6 | 1510.8 |  |
|                                | 1513.0                      | 3012.8          | 3029.5          | 3035.3          | 3037.1 | 3039.0 | 3043.3 | 3046.3 |  |
|                                | 3049.0                      | 3060.6          | 3076.7          | 3090.1          | 3094.1 | 3097.2 | 3098.9 | 3103.0 |  |
|                                | 3104.4                      | 3131.2          | 3138.9          | 3139.3          | 3816.4 |        |        |        |  |
| electronic state               | 2-A                         |                 |                 |                 |        |        |        |        |  |
| point group                    | C1                          |                 |                 |                 |        |        |        |        |  |
| rotational constants           | 1.35136                     | 0.52236         | 0.45906         |                 |        |        |        |        |  |
| ZPE                            | 0.295697 (Hartree/Particle) |                 |                 |                 |        |        |        |        |  |
| TS <sub>c</sub> α'             |                             |                 |                 |                 |        |        |        |        |  |
| optimized Cartesian coordinate | C                           | 1.002265000000  | -0.375975000000 | -1.243505000000 |        |        |        |        |  |
|                                | C                           | -0.056968000000 | -0.328448000000 | -0.154506000000 |        |        |        |        |  |
|                                | C                           | -1.488668000000 | -0.529251000000 | -0.650347000000 |        |        |        |        |  |
|                                | C                           | -2.551791000000 | -0.477639000000 | 0.454948000000  |        |        |        |        |  |
|                                | C                           | -2.575845000000 | 0.815053000000  | 1.266948000000  |        |        |        |        |  |
|                                | H                           | -0.007861000000 | 0.921090000000  | 0.185956000000  |        |        |        |        |  |
|                                | O                           | 0.130755000000  | 2.144172000000  | 0.339358000000  |        |        |        |        |  |
|                                | O                           | 0.303544000000  | 2.626829000000  | -0.948919000000 |        |        |        |        |  |
|                                | H                           | -0.583317000000 | 2.913328000000  | -1.203911000000 |        |        |        |        |  |
|                                | H                           | -2.691035000000 | 1.684186000000  | 0.613745000000  |        |        |        |        |  |
|                                | C                           | 0.358642000000  | -1.070831000000 | 1.104915000000  |        |        |        |        |  |
|                                | C                           | 1.745529000000  | -0.636714000000 | 1.593322000000  |        |        |        |        |  |
|                                | C                           | 2.792364000000  | -0.761884000000 | 0.486026000000  |        |        |        |        |  |
|                                | C                           | 2.383770000000  | 0.053268000000  | -0.741767000000 |        |        |        |        |  |
|                                | H                           | -0.377445000000 | -0.934558000000 | 1.900461000000  |        |        |        |        |  |
|                                | H                           | 1.069786000000  | -1.411693000000 | -1.608606000000 |        |        |        |        |  |
|                                | H                           | 0.691000000000  | 0.241648000000  | -2.091841000000 |        |        |        |        |  |
|                                | H                           | 1.693623000000  | 0.407822000000  | 1.919979000000  |        |        |        |        |  |
|                                | H                           | 2.032591000000  | -1.233796000000 | 2.462702000000  |        |        |        |        |  |
|                                | H                           | 3.768306000000  | -0.432423000000 | 0.851795000000  |        |        |        |        |  |
|                                | H                           | 2.896289000000  | -1.817611000000 | 0.204587000000  |        |        |        |        |  |
|                                | H                           | 2.357579000000  | 1.116393000000  | -0.484774000000 |        |        |        |        |  |
|                                | H                           | 3.117799000000  | -0.068368000000 | -1.542447000000 |        |        |        |        |  |
|                                | H                           | 0.378046000000  | -2.148464000000 | 0.876995000000  |        |        |        |        |  |
|                                | H                           | -1.696674000000 | 0.290491000000  | -1.354434000000 |        |        |        |        |  |
|                                | H                           | -2.419555000000 | -1.337726000000 | 1.121034000000  |        |        |        |        |  |
|                                | H                           | -3.528139000000 | -0.617628000000 | -0.020061000000 |        |        |        |        |  |
|                                | H                           | -3.409616000000 | 0.810942000000  | 1.971923000000  |        |        |        |        |  |
|                                | H                           | -1.655567000000 | 0.965204000000  | 1.834492000000  |        |        |        |        |  |
|                                | C                           | -1.626120000000 | -1.848222000000 | -1.430926000000 |        |        |        |        |  |
|                                | H                           | -2.664775000000 | -1.997064000000 | -1.735140000000 |        |        |        |        |  |
|                                | H                           | -1.008686000000 | -1.857379000000 | -2.329767000000 |        |        |        |        |  |

|                                |                             |                 |                 |                 |        |        |        |        |
|--------------------------------|-----------------------------|-----------------|-----------------|-----------------|--------|--------|--------|--------|
|                                | H                           | -1.335820000000 | -2.698555000000 | -0.806844000000 |        |        |        |        |
| frequencies                    | -1713.1                     | 44.1            | 64.8            | 102.1           | 107.0  | 140.7  | 146.9  | 200.5  |
|                                | 220.5                       | 230.2           | 237.3           | 263.4           | 301.6  | 303.6  | 339.3  | 389.7  |
|                                | 404.1                       | 420.6           | 456.9           | 470.6           | 486.0  | 535.1  | 613.5  | 780.7  |
|                                | 792.4                       | 802.9           | 844.1           | 866.7           | 898.6  | 919.1  | 938.4  | 955.4  |
|                                | 979.5                       | 1010.1          | 1034.9          | 1056.2          | 1071.0 | 1074.7 | 1088.8 | 1095.3 |
|                                | 1106.4                      | 1127.7          | 1165.8          | 1173.1          | 1187.0 | 1210.2 | 1242.7 | 1270.5 |
|                                | 1292.9                      | 1301.3          | 1312.9          | 1322.1          | 1350.2 | 1365.9 | 1370.7 | 1386.3 |
|                                | 1389.2                      | 1391.7          | 1399.5          | 1406.0          | 1406.4 | 1421.5 | 1462.9 | 1469.1 |
|                                | 1476.6                      | 1490.7          | 1492.0          | 1494.3          | 1502.5 | 1506.1 | 1508.9 | 1510.9 |
|                                | 1512.5                      | 2996.2          | 3003.5          | 3008.4          | 3034.1 | 3050.1 | 3055.7 | 3059.2 |
|                                | 3062.1                      | 3069.3          | 3083.7          | 3087.8          | 3097.9 | 3104.0 | 3108.4 | 3116.1 |
|                                | 3126.4                      | 3129.6          | 3141.2          | 3148.0          | 3811.8 |        |        |        |
| electronic state               | 2-A                         |                 |                 |                 |        |        |        |        |
| point group                    | C1                          |                 |                 |                 |        |        |        |        |
| rotational constants           | 1.01184                     | 0.70447         | 0.59966         |                 |        |        |        |        |
| ZPE                            | 0.296178 (Hartree/Particle) |                 |                 |                 |        |        |        |        |
| $TS_{\beta'}$                  |                             |                 |                 |                 |        |        |        |        |
| optimized Cartesian coordinate | C                           | -0.235702000000 | 0.011224000000  | -0.847352000000 |        |        |        |        |
|                                | C                           | -1.418717000000 | -0.793635000000 | -1.339764000000 |        |        |        |        |
|                                | C                           | -2.279437000000 | -1.309548000000 | -0.182459000000 |        |        |        |        |
|                                | H                           | -0.803545000000 | 1.044546000000  | -0.268929000000 |        |        |        |        |
|                                | O                           | -1.464468000000 | 1.938813000000  | 0.219883000000  |        |        |        |        |
|                                | O                           | -2.625150000000 | 1.974503000000  | -0.541488000000 |        |        |        |        |
|                                | H                           | -2.459584000000 | 2.688573000000  | -1.170300000000 |        |        |        |        |
|                                | C                           | -0.310429000000 | -1.129915000000 | 1.376394000000  |        |        |        |        |
|                                | C                           | 0.595511000000  | -0.661784000000 | 0.228230000000  |        |        |        |        |
|                                | H                           | -3.061580000000 | -1.968179000000 | -0.568369000000 |        |        |        |        |
|                                | H                           | -0.762682000000 | -0.259780000000 | 1.863382000000  |        |        |        |        |
|                                | H                           | 0.294462000000  | -1.648012000000 | 2.127536000000  |        |        |        |        |
|                                | H                           | -1.030192000000 | -1.647322000000 | -1.916784000000 |        |        |        |        |
|                                | H                           | -2.024179000000 | -0.198677000000 | -2.028131000000 |        |        |        |        |
|                                | H                           | 0.340622000000  | 0.485974000000  | -1.644902000000 |        |        |        |        |
|                                | H                           | 0.995736000000  | -1.578555000000 | -0.237327000000 |        |        |        |        |
|                                | H                           | -2.778536000000 | -0.456454000000 | 0.288408000000  |        |        |        |        |
|                                | C                           | -1.428721000000 | -2.037835000000 | 0.860204000000  |        |        |        |        |
|                                | H                           | -2.057310000000 | -2.369307000000 | 1.690805000000  |        |        |        |        |
|                                | H                           | -0.989854000000 | -2.938568000000 | 0.412933000000  |        |        |        |        |
|                                | C                           | 1.810573000000  | 0.155752000000  | 0.707843000000  |        |        |        |        |
|                                | H                           | 2.365397000000  | -0.506240000000 | 1.387117000000  |        |        |        |        |
|                                | C                           | 2.767550000000  | 0.534479000000  | -0.433152000000 |        |        |        |        |
|                                | H                           | 3.653207000000  | 0.994643000000  | 0.016587000000  |        |        |        |        |
|                                | H                           | 2.309533000000  | 1.317143000000  | -1.048810000000 |        |        |        |        |
|                                | C                           | 3.203747000000  | -0.631959000000 | -1.318119000000 |        |        |        |        |
|                                | H                           | 2.377754000000  | -1.017008000000 | -1.921163000000 |        |        |        |        |
|                                | H                           | 3.995762000000  | -0.325924000000 | -2.004299000000 |        |        |        |        |
|                                | H                           | 3.586977000000  | -1.458762000000 | -0.712817000000 |        |        |        |        |
|                                | C                           | 1.423474000000  | 1.414145000000  | 1.489051000000  |        |        |        |        |
|                                | H                           | 2.322761000000  | 1.939066000000  | 1.821342000000  |        |        |        |        |
|                                | H                           | 0.847518000000  | 2.105803000000  | 0.867675000000  |        |        |        |        |
|                                | H                           | 0.827583000000  | 1.184971000000  | 2.373632000000  |        |        |        |        |
| frequencies                    | -1745.8                     | 40.8            | 83.6            | 84.4            | 109.7  | 118.2  | 148.7  | 195.9  |
|                                | 216.9                       | 220.9           | 259.5           | 264.8           | 290.7  | 309.3  | 351.1  | 390.1  |
|                                | 410.7                       | 434.5           | 469.3           | 480.8           | 524.5  | 593.3  | 601.6  | 763.1  |
|                                | 798.4                       | 807.4           | 835.5           | 870.2           | 901.6  | 906.4  | 940.4  | 947.1  |
|                                | 975.9                       | 1007.5          | 1032.3          | 1059.5          | 1064.8 | 1069.9 | 1080.1 | 1100.0 |
|                                | 1105.8                      | 1135.8          | 1153.1          | 1169.3          | 1194.9 | 1208.1 | 1227.9 | 1266.2 |
|                                | 1286.3                      | 1294.0          | 1314.4          | 1326.3          | 1335.0 | 1353.8 | 1363.4 | 1378.8 |
|                                | 1388.6                      | 1390.0          | 1395.0          | 1398.0          | 1408.1 | 1416.7 | 1420.3 | 1460.2 |
|                                | 1466.1                      | 1491.2          | 1493.7          | 1498.4          | 1504.6 | 1507.0 | 1507.8 | 1514.7 |
|                                | 1517.1                      | 2973.4          | 2998.3          | 3019.6          | 3036.6 | 3048.9 | 3054.0 | 3054.6 |
|                                | 3060.8                      | 3065.3          | 3081.5          | 3095.8          | 3098.2 | 3102.3 | 3109.7 | 3111.8 |
|                                | 3122.1                      | 3125.0          | 3132.7          | 3146.3          | 3821.1 |        |        |        |
| electronic state               | 2-A                         |                 |                 |                 |        |        |        |        |
| point group                    | C1                          |                 |                 |                 |        |        |        |        |

|                                |                             |                 |                 |                 |        |        |        |        |
|--------------------------------|-----------------------------|-----------------|-----------------|-----------------|--------|--------|--------|--------|
| rotational constants           | 1.06876                     | 0.62289         | 0.53373         |                 |        |        |        |        |
| ZPE                            | 0.295951 (Hartree/Particle) |                 |                 |                 |        |        |        |        |
| TS <sub>c</sub> γ'             |                             |                 |                 |                 |        |        |        |        |
| optimized Cartesian coordinate | C                           | -1.700328000000 | -0.233173000000 | 1.075515000000  |        |        |        |        |
|                                | C                           | -0.188744000000 | -0.162873000000 | 1.087982000000  |        |        |        |        |
|                                | C                           | 0.421662000000  | -0.461161000000 | -0.289717000000 |        |        |        |        |
|                                | H                           | -2.057739000000 | 0.751470000000  | 0.301845000000  |        |        |        |        |
|                                | O                           | -2.288649000000 | 1.693728000000  | -0.434431000000 |        |        |        |        |
|                                | O                           | -1.346449000000 | 2.642667000000  | -0.064100000000 |        |        |        |        |
|                                | H                           | -1.826098000000 | 3.213057000000  | 0.550585000000  |        |        |        |        |
|                                | C                           | -1.684494000000 | -1.697375000000 | -0.963930000000 |        |        |        |        |
|                                | C                           | -2.307505000000 | -1.448713000000 | 0.412001000000  |        |        |        |        |
|                                | H                           | -1.966577000000 | -0.882738000000 | -1.639470000000 |        |        |        |        |
|                                | H                           | -2.078461000000 | -2.623777000000 | -1.389327000000 |        |        |        |        |
|                                | H                           | 0.179235000000  | -0.894852000000 | 1.823926000000  |        |        |        |        |
|                                | H                           | 0.126903000000  | 0.823162000000  | 1.441954000000  |        |        |        |        |
|                                | H                           | -2.167429000000 | 0.046145000000  | 2.022456000000  |        |        |        |        |
|                                | H                           | -2.120736000000 | -2.322652000000 | 1.054812000000  |        |        |        |        |
|                                | H                           | -3.392971000000 | -1.340425000000 | 0.340025000000  |        |        |        |        |
|                                | H                           | 0.098482000000  | 0.346845000000  | -0.959191000000 |        |        |        |        |
|                                | C                           | -0.161094000000 | -1.763992000000 | -0.852031000000 |        |        |        |        |
|                                | H                           | 0.103303000000  | -2.601329000000 | -0.194805000000 |        |        |        |        |
|                                | H                           | 0.286223000000  | -1.972830000000 | -1.829500000000 |        |        |        |        |
|                                | C                           | 1.965747000000  | -0.467529000000 | -0.292372000000 |        |        |        |        |
|                                | H                           | 2.263222000000  | -0.554054000000 | -1.346834000000 |        |        |        |        |
|                                | C                           | 2.574802000000  | 0.838043000000  | 0.238722000000  |        |        |        |        |
|                                | H                           | 2.383228000000  | 0.917180000000  | 1.315475000000  |        |        |        |        |
|                                | H                           | 3.662493000000  | 0.764011000000  | 0.135448000000  |        |        |        |        |
|                                | C                           | 2.085719000000  | 2.097400000000  | -0.473309000000 |        |        |        |        |
|                                | H                           | 1.026358000000  | 2.286704000000  | -0.291875000000 |        |        |        |        |
|                                | H                           | 2.645081000000  | 2.974083000000  | -0.139504000000 |        |        |        |        |
|                                | H                           | 2.225459000000  | 2.006652000000  | -1.554751000000 |        |        |        |        |
|                                | C                           | 2.572526000000  | -1.658625000000 | 0.455848000000  |        |        |        |        |
|                                | H                           | 2.286344000000  | -2.614849000000 | 0.014983000000  |        |        |        |        |
|                                | H                           | 3.663465000000  | -1.599226000000 | 0.432102000000  |        |        |        |        |
|                                | H                           | 2.271248000000  | -1.665745000000 | 1.507647000000  |        |        |        |        |
| frequencies                    | -1738.4                     | 29.3            | 52.2            | 85.8            | 98.1   | 117.9  | 154.7  | 196.4  |
|                                | 204.7                       | 211.7           | 238.5           | 262.2           | 280.9  | 310.8  | 336.5  | 399.9  |
|                                | 403.3                       | 429.6           | 469.2           | 479.8           | 519.9  | 577.7  | 605.2  | 765.1  |
|                                | 801.3                       | 804.6           | 836.8           | 864.5           | 895.4  | 905.4  | 937.4  | 949.5  |
|                                | 978.1                       | 1007.8          | 1031.0          | 1057.7          | 1061.8 | 1075.7 | 1081.9 | 1089.6 |
|                                | 1112.3                      | 1135.9          | 1154.1          | 1170.9          | 1201.2 | 1207.5 | 1232.2 | 1267.8 |
|                                | 1292.1                      | 1293.5          | 1314.9          | 1334.0          | 1337.9 | 1357.5 | 1366.1 | 1376.0 |
|                                | 1387.5                      | 1391.1          | 1404.0          | 1408.4          | 1409.9 | 1417.6 | 1423.6 | 1459.3 |
|                                | 1463.0                      | 1472.9          | 1491.4          | 1497.1          | 1500.7 | 1506.3 | 1508.1 | 1513.8 |
|                                | 1523.1                      | 2998.9          | 3003.0          | 3016.6          | 3035.5 | 3044.2 | 3046.2 | 3057.3 |
|                                | 3057.8                      | 3058.7          | 3077.8          | 3087.0          | 3091.5 | 3094.1 | 3107.5 | 3108.2 |
|                                | 3120.9                      | 3123.0          | 3140.5          | 3148.9          | 3818.0 |        |        |        |
| electronic state               | 2-A                         |                 |                 |                 |        |        |        |        |
| point group                    | C1                          |                 |                 |                 |        |        |        |        |
| rotational constants           | 0.98211                     | 0.72789         | 0.49094         |                 |        |        |        |        |
| ZPE                            | 0.295650 (Hartree/Particle) |                 |                 |                 |        |        |        |        |
| TS <sub>c</sub> δ'             |                             |                 |                 |                 |        |        |        |        |
| optimized Cartesian coordinate | C                           | 2.016754000000  | -1.279456000000 | 0.012527000000  |        |        |        |        |
|                                | C                           | 1.126904000000  | -1.083093000000 | -1.192429000000 |        |        |        |        |
|                                | C                           | 0.006100000000  | -0.073688000000 | -0.920183000000 |        |        |        |        |
|                                | C                           | -0.775753000000 | -0.435541000000 | 0.349131000000  |        |        |        |        |
|                                | C                           | -1.984174000000 | 0.483078000000  | 0.621904000000  |        |        |        |        |
|                                | C                           | -2.986508000000 | 0.514213000000  | -0.541961000000 |        |        |        |        |
|                                | C                           | -3.445289000000 | -0.860794000000 | -1.023906000000 |        |        |        |        |
|                                | H                           | 2.572375000000  | -0.105963000000 | 0.173196000000  |        |        |        |        |
|                                | O                           | 2.985675000000  | 1.035728000000  | 0.225786000000  |        |        |        |        |
|                                | O                           | 2.955026000000  | 1.469901000000  | -1.092133000000 |        |        |        |        |

|                                |                             |                 |                 |                 |        |        |        |        |
|--------------------------------|-----------------------------|-----------------|-----------------|-----------------|--------|--------|--------|--------|
|                                | H                           | 3.863888000000  | 1.341937000000  | -1.392813000000 |        |        |        |        |
|                                | H                           | -3.805691000000 | -1.466634000000 | -0.187199000000 |        |        |        |        |
|                                | C                           | 0.185529000000  | -0.495335000000 | 1.542741000000  |        |        |        |        |
|                                | C                           | 1.291751000000  | -1.529499000000 | 1.316213000000  |        |        |        |        |
|                                | H                           | -0.658550000000 | -0.036876000000 | -1.787569000000 |        |        |        |        |
|                                | H                           | -1.172385000000 | -1.451878000000 | 0.211957000000  |        |        |        |        |
|                                | H                           | 0.652708000000  | 0.484321000000  | 1.685565000000  |        |        |        |        |
|                                | H                           | -0.366944000000 | -0.730344000000 | 2.458384000000  |        |        |        |        |
|                                | H                           | 0.683411000000  | -2.057343000000 | -1.451820000000 |        |        |        |        |
|                                | H                           | 1.718726000000  | -0.768331000000 | -2.055935000000 |        |        |        |        |
|                                | H                           | 2.880737000000  | -1.924513000000 | -0.159819000000 |        |        |        |        |
|                                | H                           | 0.848007000000  | -2.536050000000 | 1.275586000000  |        |        |        |        |
|                                | H                           | 1.997601000000  | -1.533713000000 | 2.151076000000  |        |        |        |        |
|                                | H                           | 0.451076000000  | 0.920964000000  | -0.811938000000 |        |        |        |        |
|                                | H                           | -2.507838000000 | 0.048467000000  | 1.485282000000  |        |        |        |        |
|                                | H                           | -2.555630000000 | 1.076303000000  | -1.378167000000 |        |        |        |        |
|                                | H                           | -3.859269000000 | 1.088923000000  | -0.215295000000 |        |        |        |        |
|                                | H                           | -4.259605000000 | -0.770074000000 | -1.745479000000 |        |        |        |        |
|                                | H                           | -2.636152000000 | -1.412589000000 | -1.508490000000 |        |        |        |        |
|                                | C                           | -1.585026000000 | 1.914509000000  | 0.991815000000  |        |        |        |        |
|                                | H                           | -0.995142000000 | 1.954955000000  | 1.908763000000  |        |        |        |        |
|                                | H                           | -1.000792000000 | 2.381366000000  | 0.194093000000  |        |        |        |        |
|                                | H                           | -2.477881000000 | 2.525678000000  | 1.146287000000  |        |        |        |        |
| frequencies                    | -1759.6                     | 48.8            | 49.2            | 70.3            | 107.8  | 117.2  | 160.8  | 205.4  |
|                                | 209.0                       | 226.1           | 238.3           | 272.4           | 291.8  | 295.5  | 325.9  | 387.0  |
|                                | 414.1                       | 431.6           | 460.1           | 483.8           | 525.1  | 575.9  | 614.5  | 769.7  |
|                                | 789.0                       | 805.4           | 838.3           | 856.5           | 900.5  | 920.3  | 937.0  | 946.1  |
|                                | 977.6                       | 1005.3          | 1028.3          | 1055.5          | 1062.6 | 1073.3 | 1079.0 | 1098.8 |
|                                | 1104.8                      | 1137.0          | 1156.3          | 1173.3          | 1197.1 | 1207.9 | 1225.9 | 1266.9 |
|                                | 1289.7                      | 1305.3          | 1320.0          | 1325.8          | 1342.6 | 1351.7 | 1361.4 | 1375.5 |
|                                | 1385.2                      | 1390.5          | 1404.3          | 1407.0          | 1411.2 | 1416.6 | 1421.3 | 1458.8 |
|                                | 1464.1                      | 1478.1          | 1489.2          | 1496.7          | 1500.1 | 1507.2 | 1509.7 | 1511.9 |
|                                | 1515.5                      | 2994.9          | 3002.4          | 3009.3          | 3019.3 | 3049.4 | 3053.7 | 3055.0 |
|                                | 3059.9                      | 3068.1          | 3082.7          | 3092.1          | 3095.1 | 3101.6 | 3110.8 | 3111.2 |
|                                | 3122.8                      | 3125.8          | 3132.6          | 3143.2          | 3821.0 |        |        |        |
| electronic state               | 2-A                         |                 |                 |                 |        |        |        |        |
| point group                    | C1                          |                 |                 |                 |        |        |        |        |
| rotational constants           | 1.27548                     | 0.51065         | 0.48543         |                 |        |        |        |        |
| ZPE                            | 0.295736 (Hartree/Particle) |                 |                 |                 |        |        |        |        |
| <i>i</i> BCH                   |                             |                 |                 |                 |        |        |        |        |
| optimized Cartesian coordinate | C                           | -0.684308000000 | -0.944049000000 | -0.600034000000 |        |        |        |        |
|                                | C                           | -0.222712000000 | 0.268536000000  | 0.216424000000  |        |        |        |        |
|                                | C                           | -1.262956000000 | 1.391626000000  | 0.123724000000  |        |        |        |        |
|                                | C                           | -2.656912000000 | 0.925315000000  | 0.546627000000  |        |        |        |        |
|                                | C                           | -3.103844000000 | -0.279125000000 | -0.283704000000 |        |        |        |        |
|                                | C                           | -2.082069000000 | -1.413110000000 | -0.187803000000 |        |        |        |        |
|                                | H                           | -0.942373000000 | 2.241427000000  | 0.734938000000  |        |        |        |        |
|                                | H                           | -0.164079000000 | -0.037228000000 | 1.270542000000  |        |        |        |        |
|                                | H                           | -0.689476000000 | -0.667913000000 | -1.663839000000 |        |        |        |        |
|                                | H                           | 0.026595000000  | -1.768528000000 | -0.492511000000 |        |        |        |        |
|                                | H                           | -2.637232000000 | 0.644166000000  | 1.606699000000  |        |        |        |        |
|                                | H                           | -3.375381000000 | 1.743813000000  | 0.449361000000  |        |        |        |        |
|                                | H                           | -4.088351000000 | -0.624947000000 | 0.042880000000  |        |        |        |        |
|                                | H                           | -3.204728000000 | 0.026078000000  | -1.332583000000 |        |        |        |        |
|                                | H                           | -2.045674000000 | -1.774956000000 | 0.847308000000  |        |        |        |        |
|                                | H                           | -2.392350000000 | -2.259367000000 | -0.806832000000 |        |        |        |        |
|                                | H                           | -1.302567000000 | 1.746900000000  | -0.914938000000 |        |        |        |        |
|                                | C                           | 1.151355000000  | 0.782760000000  | -0.222702000000 |        |        |        |        |
|                                | H                           | 1.431138000000  | 1.625922000000  | 0.423714000000  |        |        |        |        |
|                                | H                           | 1.060523000000  | 1.191701000000  | -1.237789000000 |        |        |        |        |
|                                | C                           | 2.298656000000  | -0.235093000000 | -0.206749000000 |        |        |        |        |
|                                | H                           | 2.084728000000  | -1.011674000000 | -0.950163000000 |        |        |        |        |
|                                | C                           | 3.604919000000  | 0.449951000000  | -0.610304000000 |        |        |        |        |
|                                | H                           | 4.428123000000  | -0.266621000000 | -0.664681000000 |        |        |        |        |
|                                | H                           | 3.513036000000  | 0.936465000000  | -1.584704000000 |        |        |        |        |
|                                | H                           | 3.875621000000  | 1.216501000000  | 0.122897000000  |        |        |        |        |

|                                |                             |                 |                 |                 |        |        |        |        |
|--------------------------------|-----------------------------|-----------------|-----------------|-----------------|--------|--------|--------|--------|
|                                | C                           | 2.448667000000  | -0.904625000000 | 1.159687000000  |        |        |        |        |
|                                | H                           | 2.587267000000  | -0.148640000000 | 1.940128000000  |        |        |        |        |
|                                | H                           | 1.571688000000  | -1.500524000000 | 1.422577000000  |        |        |        |        |
|                                | H                           | 3.318709000000  | -1.565699000000 | 1.175995000000  |        |        |        |        |
| frequencies                    | 72.1                        | 81.8            | 132.6           | 174.9           | 233.9  | 239.0  | 264.6  | 294.1  |
|                                | 313.0                       | 338.6           | 405.1           | 430.2           | 445.0  | 457.4  | 481.9  | 577.9  |
|                                | 791.8                       | 798.8           | 829.5           | 850.3           | 865.2  | 908.5  | 922.0  | 935.0  |
|                                | 942.0                       | 963.8           | 979.2           | 1001.8          | 1054.2 | 1061.1 | 1079.5 | 1100.4 |
|                                | 1119.3                      | 1132.5          | 1154.2          | 1187.4          | 1202.1 | 1222.7 | 1248.0 | 1289.2 |
|                                | 1292.1                      | 1305.0          | 1312.6          | 1334.9          | 1353.6 | 1367.0 | 1372.1 | 1381.8 |
|                                | 1386.3                      | 1388.5          | 1400.2          | 1404.9          | 1411.7 | 1421.9 | 1477.4 | 1481.9 |
|                                | 1488.7                      | 1489.2          | 1493.5          | 1494.7          | 1498.2 | 1508.1 | 1509.8 | 1516.3 |
|                                | 3015.9                      | 3017.1          | 3023.9          | 3032.2          | 3036.2 | 3040.4 | 3043.0 | 3044.8 |
|                                | 3045.4                      | 3049.7          | 3064.0          | 3083.8          | 3092.7 | 3093.8 | 3095.1 | 3099.1 |
|                                | 3113.4                      | 3119.1          | 3127.7          | 3130.2          |        |        |        |        |
| electronic state               | 1-A                         |                 |                 |                 |        |        |        |        |
| point group                    | C1                          |                 |                 |                 |        |        |        |        |
| rotational constants           | 2.75943                     | 0.65169         | 0.59780         |                 |        |        |        |        |
| ZPE                            | 0.284858 (Hartree/Particle) |                 |                 |                 |        |        |        |        |
| <i>i</i> BPI                   |                             |                 |                 |                 |        |        |        |        |
| optimized Cartesian coordinate | C                           | 0.650542000000  | 0.978405000000  | -0.546908000000 |        |        |        |        |
|                                | C                           | 0.193344000000  | -0.268530000000 | 0.218266000000  |        |        |        |        |
|                                | C                           | -1.186086000000 | -0.759757000000 | -0.229664000000 |        |        |        |        |
|                                | C                           | -2.319406000000 | 0.272743000000  | -0.147598000000 |        |        |        |        |
|                                | C                           | -2.443972000000 | 0.847773000000  | 1.224650000000  |        |        |        |        |
|                                | C                           | 1.228511000000  | -1.389932000000 | 0.071566000000  |        |        |        |        |
|                                | C                           | 2.627688000000  | -0.945973000000 | 0.501240000000  |        |        |        |        |
|                                | C                           | 3.070983000000  | 0.289916000000  | -0.283483000000 |        |        |        |        |
|                                | C                           | 2.054712000000  | 1.422203000000  | -0.128557000000 |        |        |        |        |
|                                | H                           | 0.910306000000  | -2.263505000000 | 0.649782000000  |        |        |        |        |
|                                | H                           | 0.136109000000  | 0.000772000000  | 1.282576000000  |        |        |        |        |
|                                | H                           | 0.641623000000  | 0.755523000000  | -1.623281000000 |        |        |        |        |
|                                | H                           | -0.055063000000 | 1.798018000000  | -0.383079000000 |        |        |        |        |
|                                | H                           | 2.617944000000  | -0.707752000000 | 1.571872000000  |        |        |        |        |
|                                | H                           | 3.342142000000  | -1.762344000000 | 0.364502000000  |        |        |        |        |
|                                | H                           | 4.060288000000  | 0.618275000000  | 0.046650000000  |        |        |        |        |
|                                | H                           | 3.159578000000  | 0.027898000000  | -1.345112000000 |        |        |        |        |
|                                | H                           | 2.028748000000  | 1.738012000000  | 0.921629000000  |        |        |        |        |
|                                | H                           | 2.362519000000  | 2.293878000000  | -0.712560000000 |        |        |        |        |
|                                | H                           | 1.259324000000  | -1.702511000000 | -0.981172000000 |        |        |        |        |
|                                | H                           | -1.466463000000 | -1.627924000000 | 0.381909000000  |        |        |        |        |
|                                | H                           | -1.115205000000 | -1.120835000000 | -1.263786000000 |        |        |        |        |
|                                | H                           | -2.107336000000 | 1.085804000000  | -0.850794000000 |        |        |        |        |
|                                | H                           | -2.872412000000 | 1.829417000000  | 1.381553000000  |        |        |        |        |
|                                | H                           | -2.334209000000 | 0.203355000000  | 2.089963000000  |        |        |        |        |
|                                | C                           | -3.647836000000 | -0.372383000000 | -0.587096000000 |        |        |        |        |
|                                | H                           | -3.911723000000 | -1.192625000000 | 0.086107000000  |        |        |        |        |
|                                | H                           | -4.462509000000 | 0.354368000000  | -0.570529000000 |        |        |        |        |
|                                | H                           | -3.564542000000 | -0.774614000000 | -1.600727000000 |        |        |        |        |
| frequencies                    | 56.7                        | 80.7            | 133.4           | 176.9           | 183.9  | 233.8  | 249.3  | 278.1  |
|                                | 309.4                       | 336.6           | 377.5           | 422.8           | 443.8  | 450.5  | 475.8  | 549.3  |
|                                | 582.3                       | 791.2           | 799.0           | 842.6           | 852.6  | 871.4  | 908.7  | 914.0  |
|                                | 940.4                       | 948.6           | 966.5           | 997.9           | 1053.2 | 1056.1 | 1059.5 | 1084.7 |
|                                | 1103.5                      | 1125.0          | 1140.2          | 1165.0          | 1185.9 | 1220.9 | 1246.1 | 1284.9 |
|                                | 1292.2                      | 1304.5          | 1309.5          | 1325.5          | 1346.9 | 1366.7 | 1370.6 | 1380.4 |
|                                | 1386.0                      | 1388.3          | 1392.6          | 1401.8          | 1411.5 | 1462.7 | 1479.1 | 1483.4 |
|                                | 1488.4                      | 1488.8          | 1494.0          | 1498.2          | 1502.5 | 1508.3 | 3014.3 | 3021.4 |
|                                | 3021.7                      | 3031.4          | 3036.8          | 3041.2          | 3045.2 | 3048.9 | 3051.5 | 3068.7 |
|                                | 3083.1                      | 3093.7          | 3094.3          | 3095.3          | 3099.4 | 3122.8 | 3134.3 | 3155.0 |
|                                | 3259.8                      |                 |                 |                 |        |        |        |        |
| electronic state               | 2-A                         |                 |                 |                 |        |        |        |        |
| point group                    | C1                          |                 |                 |                 |        |        |        |        |
| rotational constants           | 2.81588                     | 0.66026         | 0.60506         |                 |        |        |        |        |
| ZPE                            | 0.269962 (Hartree/Particle) |                 |                 |                 |        |        |        |        |

|                                |                             |                 |                 |                 |        |        |        |        |
|--------------------------------|-----------------------------|-----------------|-----------------|-----------------|--------|--------|--------|--------|
| <i>i</i> BP2                   |                             |                 |                 |                 |        |        |        |        |
| optimized Cartesian coordinate | C                           | -1.359072000000 | -1.321002000000 | -0.407578000000 |        |        |        |        |
|                                | C                           | -0.176800000000 | -0.491044000000 | 0.101683000000  |        |        |        |        |
|                                | C                           | 1.142718000000  | -0.974090000000 | -0.535550000000 |        |        |        |        |
|                                | C                           | 2.359509000000  | -0.235340000000 | -0.073930000000 |        |        |        |        |
|                                | C                           | 2.987857000000  | 0.822848000000  | -0.920268000000 |        |        |        |        |
|                                | C                           | -0.419373000000 | 0.999316000000  | -0.155626000000 |        |        |        |        |
|                                | C                           | -1.750818000000 | 1.472012000000  | 0.433071000000  |        |        |        |        |
|                                | C                           | -2.918864000000 | 0.633775000000  | -0.089545000000 |        |        |        |        |
|                                | C                           | -2.688323000000 | -0.853025000000 | 0.188259000000  |        |        |        |        |
|                                | H                           | 0.403872000000  | 1.588796000000  | 0.259473000000  |        |        |        |        |
|                                | H                           | -0.104089000000 | -0.637424000000 | 1.189304000000  |        |        |        |        |
|                                | H                           | -1.403507000000 | -1.230423000000 | -1.501460000000 |        |        |        |        |
|                                | H                           | -1.191489000000 | -2.379707000000 | -0.185361000000 |        |        |        |        |
|                                | H                           | -1.709133000000 | 1.384754000000  | 1.525838000000  |        |        |        |        |
|                                | H                           | -1.908900000000 | 2.529918000000  | 0.206516000000  |        |        |        |        |
|                                | H                           | -3.857628000000 | 0.965218000000  | 0.362432000000  |        |        |        |        |
|                                | H                           | -3.014836000000 | 0.785842000000  | -1.171708000000 |        |        |        |        |
|                                | H                           | -2.675375000000 | -1.018051000000 | 1.272571000000  |        |        |        |        |
|                                | H                           | -3.513008000000 | -1.448542000000 | -0.212819000000 |        |        |        |        |
|                                | H                           | -0.416259000000 | 1.172702000000  | -1.241036000000 |        |        |        |        |
|                                | H                           | 1.048194000000  | -0.896973000000 | -1.625195000000 |        |        |        |        |
|                                | H                           | 1.250703000000  | -2.042951000000 | -0.301178000000 |        |        |        |        |
|                                | H                           | 2.801484000000  | 0.652489000000  | -1.982966000000 |        |        |        |        |
|                                | H                           | 2.602732000000  | 1.826953000000  | -0.680986000000 |        |        |        |        |
|                                | H                           | 4.071147000000  | 0.863817000000  | -0.764360000000 |        |        |        |        |
|                                | C                           | 2.699160000000  | -0.270067000000 | 1.380639000000  |        |        |        |        |
|                                | H                           | 2.163624000000  | 0.510852000000  | 1.944641000000  |        |        |        |        |
|                                | H                           | 2.429685000000  | -1.228814000000 | 1.833001000000  |        |        |        |        |
|                                | H                           | 3.766827000000  | -0.098761000000 | 1.546364000000  |        |        |        |        |
| frequencies                    | 54.0                        | 68.6            | 109.2           | 119.5           | 151.0  | 163.9  | 235.8  | 255.8  |
|                                | 309.1                       | 330.3           | 385.6           | 408.9           | 439.0  | 446.8  | 486.8  | 556.5  |
|                                | 781.5                       | 793.9           | 800.8           | 849.7           | 865.1  | 910.3  | 931.8  | 943.8  |
|                                | 949.1                       | 974.3           | 987.8           | 1019.1          | 1038.5 | 1056.2 | 1074.7 | 1087.0 |
|                                | 1098.3                      | 1124.6          | 1131.7          | 1194.1          | 1212.4 | 1275.9 | 1286.1 | 1294.1 |
|                                | 1297.5                      | 1319.2          | 1324.5          | 1340.4          | 1367.5 | 1373.1 | 1385.2 | 1387.7 |
|                                | 1390.8                      | 1402.4          | 1406.5          | 1417.7          | 1472.5 | 1474.1 | 1478.2 | 1484.1 |
|                                | 1487.5                      | 1488.7          | 1490.1          | 1494.3          | 1502.1 | 1508.7 | 2977.3 | 2981.5 |
|                                | 3006.3                      | 3012.1          | 3022.1          | 3030.3          | 3037.0 | 3040.3 | 3045.3 | 3063.1 |
|                                | 3068.3                      | 3069.2          | 3084.5          | 3090.1          | 3093.8 | 3095.3 | 3099.5 | 3115.8 |
|                                | 3122.7                      |                 |                 |                 |        |        |        |        |
| electronic state               | 2-A                         |                 |                 |                 |        |        |        |        |
| point group                    | C1                          |                 |                 |                 |        |        |        |        |
| rotational constants           | 2.49628                     | 0.71104         | 0.65365         |                 |        |        |        |        |
| ZPE                            | 0.270075 (Hartree/Particle) |                 |                 |                 |        |        |        |        |
| <i>i</i> BP3                   |                             |                 |                 |                 |        |        |        |        |
| optimized Cartesian coordinate | C                           | -0.864312000000 | 1.045901000000  | 0.604827000000  |        |        |        |        |
|                                | C                           | -0.204487000000 | -0.151190000000 | -0.110002000000 |        |        |        |        |
|                                | C                           | 1.151950000000  | -0.446188000000 | 0.440354000000  |        |        |        |        |
|                                | C                           | 2.406100000000  | -0.177536000000 | -0.329051000000 |        |        |        |        |
|                                | C                           | 3.631595000000  | -0.759213000000 | 0.374648000000  |        |        |        |        |
|                                | H                           | 3.522966000000  | -1.835124000000 | 0.528226000000  |        |        |        |        |
|                                | C                           | -1.127487000000 | -1.380373000000 | -0.017627000000 |        |        |        |        |
|                                | C                           | -2.526564000000 | -1.089124000000 | -0.564335000000 |        |        |        |        |
|                                | C                           | -3.162135000000 | 0.105269000000  | 0.149616000000  |        |        |        |        |
|                                | C                           | -2.262313000000 | 1.338779000000  | 0.055575000000  |        |        |        |        |
|                                | H                           | -0.671824000000 | -2.219479000000 | -0.551182000000 |        |        |        |        |
|                                | H                           | -0.101095000000 | 0.110574000000  | -1.173572000000 |        |        |        |        |
|                                | H                           | -0.933159000000 | 0.811378000000  | 1.674966000000  |        |        |        |        |
|                                | H                           | -0.221690000000 | 1.926649000000  | 0.515799000000  |        |        |        |        |
|                                | H                           | -2.454378000000 | -0.869772000000 | -1.636712000000 |        |        |        |        |
|                                | H                           | -3.160643000000 | -1.974403000000 | -0.464852000000 |        |        |        |        |
|                                | H                           | -4.148131000000 | 0.319981000000  | -0.271254000000 |        |        |        |        |
|                                | H                           | -3.314683000000 | -0.147585000000 | 1.206054000000  |        |        |        |        |



|                                |                             |                 |                 |                 |        |        |        |        |
|--------------------------------|-----------------------------|-----------------|-----------------|-----------------|--------|--------|--------|--------|
|                                | H                           | -2.178941000000 | 1.643837000000  | -0.994891000000 |        |        |        |        |
|                                | H                           | -2.709150000000 | 2.178949000000  | 0.594253000000  |        |        |        |        |
|                                | H                           | -1.201070000000 | -1.677416000000 | 1.036719000000  |        |        |        |        |
|                                | H                           | 1.223417000000  | -0.764421000000 | 1.477972000000  |        |        |        |        |
|                                | H                           | 2.309622000000  | -0.657690000000 | -1.314601000000 |        |        |        |        |
|                                | H                           | 4.540225000000  | -0.584358000000 | -0.206061000000 |        |        |        |        |
|                                | H                           | 3.762268000000  | -0.288484000000 | 1.353859000000  |        |        |        |        |
|                                | C                           | 2.592985000000  | 1.330138000000  | -0.580202000000 |        |        |        |        |
|                                | H                           | 1.730608000000  | 1.756736000000  | -1.098119000000 |        |        |        |        |
|                                | H                           | 2.712227000000  | 1.857206000000  | 0.370991000000  |        |        |        |        |
|                                | H                           | 3.481441000000  | 1.514647000000  | -1.190414000000 |        |        |        |        |
| frequencies                    | 41.7                        | 51.7            | 92.8            | 209.3           | 234.9  | 238.1  | 247.8  | 264.9  |
|                                | 287.0                       | 314.5           | 362.8           | 394.8           | 437.7  | 461.0  | 484.1  | 522.6  |
|                                | 568.9                       | 795.6           | 807.5           | 840.5           | 864.1  | 899.1  | 907.3  | 928.3  |
|                                | 936.5                       | 954.9           | 972.9           | 1007.4          | 1052.5 | 1061.1 | 1091.6 | 1109.8 |
|                                | 1115.1                      | 1116.7          | 1151.9          | 1187.8          | 1200.8 | 1203.2 | 1243.8 | 1288.7 |
|                                | 1291.6                      | 1298.6          | 1321.8          | 1325.7          | 1345.2 | 1357.9 | 1371.2 | 1383.8 |
|                                | 1384.8                      | 1386.7          | 1396.5          | 1414.7          | 1439.8 | 1480.8 | 1485.7 | 1488.5 |
|                                | 1491.0                      | 1492.7          | 1494.6          | 1506.0          | 1507.7 | 1515.0 | 2994.4 | 3010.2 |
|                                | 3032.1                      | 3036.0          | 3039.4          | 3041.4          | 3045.8 | 3046.6 | 3052.4 | 3091.6 |
|                                | 3093.6                      | 3094.3          | 3095.2          | 3099.9          | 3119.1 | 3123.6 | 3127.6 | 3134.4 |
|                                | 3157.9                      |                 |                 |                 |        |        |        |        |
| electronic state               | 2-A                         |                 |                 |                 |        |        |        |        |
| point group                    | C1                          |                 |                 |                 |        |        |        |        |
| rotational constants           | 2.80875                     | 0.64603         | 0.57102         |                 |        |        |        |        |
| ZPE                            | 0.270117 (Hartree/Particle) |                 |                 |                 |        |        |        |        |
|                                |                             |                 |                 |                 |        |        |        |        |
| <i>i</i> BP4                   |                             |                 |                 |                 |        |        |        |        |
| optimized Cartesian coordinate | C                           | 1.031858000000  | 1.002786000000  | -0.966614000000 |        |        |        |        |
|                                | C                           | 0.220698000000  | -0.192408000000 | -0.574317000000 |        |        |        |        |
|                                | C                           | -1.234587000000 | -0.287529000000 | -0.903249000000 |        |        |        |        |
|                                | C                           | -2.152005000000 | -0.181153000000 | 0.334551000000  |        |        |        |        |
|                                | C                           | -1.996249000000 | 1.180016000000  | 1.011018000000  |        |        |        |        |
|                                | H                           | -2.289989000000 | 1.980712000000  | 0.323436000000  |        |        |        |        |
|                                | C                           | 0.965957000000  | -1.423796000000 | -0.162511000000 |        |        |        |        |
|                                | C                           | 2.099936000000  | -1.110872000000 | 0.823054000000  |        |        |        |        |
|                                | C                           | 2.988369000000  | 0.015118000000  | 0.291406000000  |        |        |        |        |
|                                | C                           | 2.169064000000  | 1.279602000000  | 0.027270000000  |        |        |        |        |
|                                | H                           | 0.277257000000  | -2.159273000000 | 0.265499000000  |        |        |        |        |
|                                | H                           | 1.479593000000  | 0.835492000000  | -1.962848000000 |        |        |        |        |
|                                | H                           | 0.387070000000  | 1.881632000000  | -1.064891000000 |        |        |        |        |
|                                | H                           | 1.663687000000  | -0.800872000000 | 1.779745000000  |        |        |        |        |
|                                | H                           | 2.692619000000  | -2.009882000000 | 1.012766000000  |        |        |        |        |
|                                | H                           | 3.794073000000  | 0.227930000000  | 0.999107000000  |        |        |        |        |
|                                | H                           | 3.462607000000  | -0.310115000000 | -0.643342000000 |        |        |        |        |
|                                | H                           | 1.738324000000  | 1.629296000000  | 0.972778000000  |        |        |        |        |
|                                | H                           | 2.810564000000  | 2.080142000000  | -0.350922000000 |        |        |        |        |
|                                | H                           | 1.407128000000  | -1.900346000000 | -1.056521000000 |        |        |        |        |
|                                | H                           | -1.444453000000 | -1.244004000000 | -1.402490000000 |        |        |        |        |
|                                | H                           | -1.519846000000 | 0.505753000000  | -1.606430000000 |        |        |        |        |
|                                | H                           | -1.840722000000 | -0.957401000000 | 1.044884000000  |        |        |        |        |
|                                | H                           | -2.628702000000 | 1.253403000000  | 1.899169000000  |        |        |        |        |
|                                | H                           | -0.960891000000 | 1.356132000000  | 1.313513000000  |        |        |        |        |
|                                | C                           | -3.607473000000 | -0.431538000000 | -0.055282000000 |        |        |        |        |
|                                | H                           | -4.265567000000 | -0.375898000000 | 0.815325000000  |        |        |        |        |
|                                | H                           | -3.942706000000 | 0.321160000000  | -0.776224000000 |        |        |        |        |
|                                | H                           | -3.733449000000 | -1.415204000000 | -0.514504000000 |        |        |        |        |
| frequencies                    | 35.9                        | 45.6            | 67.8            | 169.9           | 216.0  | 225.7  | 256.4  | 279.0  |
|                                | 323.1                       | 349.7           | 373.0           | 409.4           | 423.8  | 445.2  | 478.0  | 567.2  |
|                                | 767.2                       | 792.1           | 821.3           | 852.8           | 859.1  | 872.7  | 925.3  | 930.5  |
|                                | 932.6                       | 957.4           | 973.0           | 995.1           | 1047.2 | 1076.8 | 1088.8 | 1098.7 |
|                                | 1111.3                      | 1141.0          | 1173.9          | 1193.9          | 1195.6 | 1236.2 | 1255.9 | 1285.5 |
|                                | 1295.2                      | 1319.5          | 1327.2          | 1357.1          | 1360.8 | 1365.8 | 1372.8 | 1379.4 |
|                                | 1387.2                      | 1402.8          | 1411.0          | 1418.1          | 1468.2 | 1475.1 | 1479.4 | 1487.6 |
|                                | 1490.4                      | 1491.8          | 1496.7          | 1503.9          | 1506.3 | 1513.6 | 2946.6 | 2949.5 |
|                                | 3007.5                      | 3033.6          | 3035.1          | 3043.6          | 3044.9 | 3047.5 | 3048.0 | 3059.9 |
|                                | 3076.2                      | 3079.9          | 3096.3          | 3096.8          | 3100.3 | 3112.3 | 3118.0 | 3127.4 |

|                                |                               |                 |                 |                 |        |        |        |        |
|--------------------------------|-------------------------------|-----------------|-----------------|-----------------|--------|--------|--------|--------|
|                                | 3128.9                        |                 |                 |                 |        |        |        |        |
| electronic state               | 2-A                           |                 |                 |                 |        |        |        |        |
| point group                    | C1                            |                 |                 |                 |        |        |        |        |
| rotational constants           | 2.49867    0.70800    0.65751 |                 |                 |                 |        |        |        |        |
| ZPE                            | 0.270446 (Hartree/Particle)   |                 |                 |                 |        |        |        |        |
| <i>i</i> BP5                   |                               |                 |                 |                 |        |        |        |        |
| optimized Cartesian coordinate | C                             | 0.695336000000  | 0.913114000000  | -0.567789000000 |        |        |        |        |
|                                | C                             | 2.047344000000  | 1.447522000000  | -0.226834000000 |        |        |        |        |
|                                | C                             | 3.099519000000  | 0.320749000000  | -0.304710000000 |        |        |        |        |
|                                | C                             | 1.284609000000  | -1.392712000000 | 0.116393000000  |        |        |        |        |
|                                | C                             | 0.219478000000  | -0.276702000000 | 0.202836000000  |        |        |        |        |
|                                | H                             | 4.072750000000  | 0.691271000000  | 0.029454000000  |        |        |        |        |
|                                | H                             | 1.327867000000  | -1.756037000000 | -0.918006000000 |        |        |        |        |
|                                | H                             | 0.980883000000  | -2.237304000000 | 0.743720000000  |        |        |        |        |
|                                | H                             | 2.042231000000  | 1.832062000000  | 0.803506000000  |        |        |        |        |
|                                | H                             | 2.324860000000  | 2.277947000000  | -0.878918000000 |        |        |        |        |
|                                | H                             | 0.243260000000  | 1.147368000000  | -1.525719000000 |        |        |        |        |
|                                | H                             | 0.161889000000  | 0.003973000000  | 1.266728000000  |        |        |        |        |
|                                | H                             | 3.210471000000  | 0.010090000000  | -1.349621000000 |        |        |        |        |
|                                | C                             | 2.665111000000  | -0.882004000000 | 0.536233000000  |        |        |        |        |
|                                | H                             | 3.403305000000  | -1.684434000000 | 0.453725000000  |        |        |        |        |
|                                | H                             | 2.632836000000  | -0.588714000000 | 1.592895000000  |        |        |        |        |
|                                | C                             | -1.151790000000 | -0.780114000000 | -0.248170000000 |        |        |        |        |
|                                | H                             | -1.436294000000 | -1.636854000000 | 0.377072000000  |        |        |        |        |
|                                | H                             | -1.063158000000 | -1.160577000000 | -1.274092000000 |        |        |        |        |
|                                | C                             | -2.282197000000 | 0.255664000000  | -0.199883000000 |        |        |        |        |
|                                | H                             | -2.044995000000 | 1.056194000000  | -0.910175000000 |        |        |        |        |
|                                | C                             | -2.422016000000 | 0.884266000000  | 1.186783000000  |        |        |        |        |
|                                | H                             | -2.561023000000 | 0.108530000000  | 1.947699000000  |        |        |        |        |
|                                | H                             | -1.539848000000 | 1.470419000000  | 1.453921000000  |        |        |        |        |
|                                | H                             | -3.288244000000 | 1.549357000000  | 1.225045000000  |        |        |        |        |
|                                | C                             | -3.598639000000 | -0.390544000000 | -0.632121000000 |        |        |        |        |
|                                | H                             | -3.511490000000 | -0.846885000000 | -1.621522000000 |        |        |        |        |
|                                | H                             | -3.888237000000 | -1.175024000000 | 0.074543000000  |        |        |        |        |
|                                | H                             | -4.407596000000 | 0.343173000000  | -0.666685000000 |        |        |        |        |
| frequencies                    | 55.7                          | 89.8            | 107.0           | 166.4           | 203.1  | 237.5  | 264.5  | 291.6  |
|                                | 312.9                         | 316.8           | 340.8           | 407.3           | 437.3  | 452.4  | 475.6  | 532.2  |
|                                | 596.2                         | 802.3           | 821.9           | 846.4           | 856.2  | 879.1  | 929.0  | 934.2  |
|                                | 937.7                         | 964.3           | 978.3           | 985.7           | 1042.8 | 1068.4 | 1076.3 | 1103.4 |
|                                | 1116.2                        | 1145.8          | 1161.7          | 1167.0          | 1203.4 | 1218.6 | 1245.8 | 1266.2 |
|                                | 1291.7                        | 1304.8          | 1316.6          | 1341.8          | 1343.4 | 1351.9 | 1368.3 | 1371.5 |
|                                | 1384.7                        | 1395.5          | 1403.9          | 1420.4          | 1427.3 | 1477.4 | 1482.4 | 1487.3 |
|                                | 1490.4                        | 1493.5          | 1498.3          | 1502.0          | 1508.0 | 1518.0 | 2987.3 | 3008.6 |
|                                | 3022.6                        | 3035.9          | 3040.0          | 3043.0          | 3045.3 | 3048.5 | 3050.3 | 3067.3 |
|                                | 3085.2                        | 3094.3          | 3099.1          | 3110.1          | 3113.4 | 3118.7 | 3127.8 | 3131.2 |
|                                | 3187.8                        |                 |                 |                 |        |        |        |        |
| electronic state               | 2-A                           |                 |                 |                 |        |        |        |        |
| point group                    | C1                            |                 |                 |                 |        |        |        |        |
| rotational constants           | 2.80423    0.65537    0.60380 |                 |                 |                 |        |        |        |        |
| ZPE                            | 0.270267 (Hartree/Particle)   |                 |                 |                 |        |        |        |        |
| <i>i</i> BP6                   |                               |                 |                 |                 |        |        |        |        |
| optimized Cartesian coordinate | C                             | 2.088685000000  | 1.404674000000  | -0.240071000000 |        |        |        |        |
|                                | C                             | 0.686695000000  | 1.002811000000  | -0.560807000000 |        |        |        |        |
|                                | C                             | 0.249378000000  | -0.253007000000 | 0.215303000000  |        |        |        |        |
|                                | C                             | 2.686071000000  | -0.885089000000 | 0.554628000000  |        |        |        |        |
|                                | C                             | 3.147374000000  | 0.352499000000  | -0.229749000000 |        |        |        |        |
|                                | H                             | 2.628790000000  | -0.633061000000 | 1.619242000000  |        |        |        |        |
|                                | H                             | 3.418855000000  | -1.689836000000 | 0.451126000000  |        |        |        |        |
|                                | H                             | 0.597555000000  | 0.771505000000  | -1.638840000000 |        |        |        |        |
|                                | H                             | 0.001080000000  | 1.832591000000  | -0.369879000000 |        |        |        |        |
|                                | H                             | 2.366253000000  | 2.451154000000  | -0.266432000000 |        |        |        |        |
|                                | H                             | 3.366326000000  | 0.036799000000  | -1.264535000000 |        |        |        |        |

|                                |                             |                 |                 |                 |        |        |        |        |  |
|--------------------------------|-----------------------------|-----------------|-----------------|-----------------|--------|--------|--------|--------|--|
|                                | H                           | 4.082647000000  | 0.743807000000  | 0.177271000000  |        |        |        |        |  |
|                                | H                           | 0.194022000000  | 0.013824000000  | 1.278755000000  |        |        |        |        |  |
|                                | C                           | 1.311290000000  | -1.349136000000 | 0.073225000000  |        |        |        |        |  |
|                                | H                           | 1.376864000000  | -1.641843000000 | -0.983870000000 |        |        |        |        |  |
|                                | H                           | 0.995260000000  | -2.238518000000 | -2.237670000000 |        |        |        |        |  |
|                                | C                           | -1.117800000000 | -0.767974000000 | -0.241111000000 |        |        |        |        |  |
|                                | H                           | -1.022901000000 | -1.142117000000 | -1.269198000000 |        |        |        |        |  |
|                                | H                           | -1.388646000000 | -1.634155000000 | 0.377804000000  |        |        |        |        |  |
|                                | C                           | -2.273582000000 | 0.238967000000  | -0.191018000000 |        |        |        |        |  |
|                                | H                           | -2.060512000000 | 1.047537000000  | -0.900064000000 |        |        |        |        |  |
|                                | C                           | -2.437945000000 | 0.849436000000  | 1.201306000000  |        |        |        |        |  |
|                                | H                           | -1.566176000000 | 1.437242000000  | 1.497393000000  |        |        |        |        |  |
|                                | H                           | -3.311250000000 | 1.505321000000  | 1.237947000000  |        |        |        |        |  |
|                                | H                           | -2.579872000000 | 0.060368000000  | 1.947582000000  |        |        |        |        |  |
|                                | C                           | -3.571514000000 | -0.438729000000 | -0.631984000000 |        |        |        |        |  |
|                                | H                           | -3.470030000000 | -0.881576000000 | -1.626031000000 |        |        |        |        |  |
|                                | H                           | -3.839763000000 | -1.238483000000 | 0.065763000000  |        |        |        |        |  |
|                                | H                           | -4.400404000000 | 0.272727000000  | -0.660040000000 |        |        |        |        |  |
| frequencies                    | 72.6                        | 84.0            | 133.8           | 166.3           | 190.9  | 235.3  | 262.0  | 287.7  |  |
|                                | 300.7                       | 317.4           | 379.4           | 405.5           | 425.5  | 448.2  | 468.2  | 516.0  |  |
|                                | 631.2                       | 792.2           | 823.5           | 849.0           | 854.7  | 868.4  | 920.8  | 936.1  |  |
|                                | 942.7                       | 958.7           | 977.8           | 991.3           | 1043.6 | 1070.4 | 1096.4 | 1110.5 |  |
|                                | 1125.9                      | 1136.2          | 1137.3          | 1172.7          | 1201.8 | 1222.9 | 1245.2 | 1274.1 |  |
|                                | 1300.1                      | 1306.9          | 1330.2          | 1342.9          | 1362.7 | 1366.8 | 1367.8 | 1378.5 |  |
|                                | 1391.2                      | 1403.5          | 1406.9          | 1411.2          | 1422.5 | 1468.4 | 1473.4 | 1478.5 |  |
|                                | 1490.8                      | 1493.5          | 1497.8          | 1499.0          | 1508.8 | 1516.4 | 2939.4 | 2959.4 |  |
|                                | 3018.2                      | 3023.0          | 3035.5          | 3044.1          | 3046.2 | 3050.4 | 3051.9 | 3065.3 |  |
|                                | 3085.4                      | 3095.4          | 3098.8          | 3101.2          | 3114.3 | 3119.9 | 3128.2 | 3131.2 |  |
|                                | 3204.5                      |                 |                 |                 |        |        |        |        |  |
| electronic state               | 2-A                         |                 |                 |                 |        |        |        |        |  |
| point group                    | C1                          |                 |                 |                 |        |        |        |        |  |
| rotational constants           | 2.84080                     | 0.65427         | 0.60339         |                 |        |        |        |        |  |
| ZPE                            | 0.270206 (Hartree/Particle) |                 |                 |                 |        |        |        |        |  |
|                                |                             |                 |                 |                 |        |        |        |        |  |
| <i>i</i> BP7                   |                             |                 |                 |                 |        |        |        |        |  |
| optimized Cartesian coordinate | C                           | -3.103977000000 | 0.318673000000  | -0.185230000000 |        |        |        |        |  |
|                                | C                           | -2.112055000000 | 1.432781000000  | -0.231295000000 |        |        |        |        |  |
|                                | C                           | -0.718456000000 | 0.937689000000  | -0.649257000000 |        |        |        |        |  |
|                                | C                           | -0.271907000000 | -0.272025000000 | 0.178532000000  |        |        |        |        |  |
|                                | C                           | 1.111496000000  | -0.784239000000 | -0.234118000000 |        |        |        |        |  |
|                                | C                           | 2.257677000000  | 0.234356000000  | -0.195160000000 |        |        |        |        |  |
|                                | C                           | 2.375536000000  | 0.908950000000  | 1.171938000000  |        |        |        |        |  |
|                                | H                           | 2.494173000000  | 0.155833000000  | 1.958413000000  |        |        |        |        |  |
|                                | C                           | -1.306305000000 | -1.397223000000 | 0.059790000000  |        |        |        |        |  |
|                                | C                           | -2.704052000000 | -0.943465000000 | 0.504197000000  |        |        |        |        |  |
|                                | H                           | -0.000111000000 | 1.756596000000  | -0.552005000000 |        |        |        |        |  |
|                                | H                           | -0.235046000000 | 0.032809000000  | 1.234323000000  |        |        |        |        |  |
|                                | H                           | -1.351496000000 | -1.721658000000 | -0.987195000000 |        |        |        |        |  |
|                                | H                           | -0.985588000000 | -2.260690000000 | 0.651181000000  |        |        |        |        |  |
|                                | H                           | -2.022116000000 | 1.886750000000  | 0.771215000000  |        |        |        |        |  |
|                                | H                           | -2.450094000000 | 2.229783000000  | -0.897832000000 |        |        |        |        |  |
|                                | H                           | -4.148599000000 | 0.515705000000  | -0.392417000000 |        |        |        |        |  |
|                                | H                           | -2.679769000000 | -0.778272000000 | 1.595256000000  |        |        |        |        |  |
|                                | H                           | -3.438190000000 | -1.733656000000 | 0.329803000000  |        |        |        |        |  |
|                                | H                           | -0.736947000000 | 0.648459000000  | -1.707967000000 |        |        |        |        |  |
|                                | H                           | 1.040817000000  | -1.193767000000 | -1.250470000000 |        |        |        |        |  |
|                                | H                           | 1.378998000000  | -1.626678000000 | 0.418217000000  |        |        |        |        |  |
|                                | H                           | 2.061801000000  | 1.007964000000  | -0.946506000000 |        |        |        |        |  |
|                                | H                           | 3.245928000000  | 1.568807000000  | 1.206649000000  |        |        |        |        |  |
|                                | H                           | 1.493438000000  | 1.507224000000  | 1.411501000000  |        |        |        |        |  |
|                                | C                           | 3.572939000000  | -0.452316000000 | -0.565392000000 |        |        |        |        |  |
|                                | H                           | 3.827343000000  | -1.214777000000 | 0.177817000000  |        |        |        |        |  |
|                                | H                           | 3.503308000000  | -0.943967000000 | -1.539037000000 |        |        |        |        |  |
|                                | H                           | 4.396776000000  | 0.264449000000  | -0.604971000000 |        |        |        |        |  |
| frequencies                    | 68.4                        | 80.3            | 130.7           | 153.9           | 215.7  | 231.0  | 247.1  | 267.6  |  |
|                                | 294.5                       | 312.8           | 360.0           | 407.9           | 430.9  | 449.3  | 459.8  | 527.1  |  |
|                                | 640.0                       | 782.0           | 798.1           | 838.1           | 863.4  | 904.7  | 918.7  | 933.3  |  |

|                                |                             |                 |         |                 |        |                 |        |        |
|--------------------------------|-----------------------------|-----------------|---------|-----------------|--------|-----------------|--------|--------|
|                                | 950.5                       | 963.5           | 977.5   | 992.9           | 1042.3 | 1056.8          | 1085.2 | 1103.2 |
|                                | 1118.0                      | 1135.7          | 1153.0  | 1173.2          | 1201.8 | 1231.3          | 1233.0 | 1283.3 |
|                                | 1291.2                      | 1306.9          | 1321.4  | 1342.8          | 1351.0 | 1370.0          | 1370.5 | 1379.4 |
|                                | 1399.6                      | 1400.7          | 1405.0  | 1411.3          | 1421.9 | 1469.1          | 1477.0 | 1479.0 |
|                                | 1483.2                      | 1493.2          | 1497.8  | 1498.6          | 1509.2 | 1515.9          | 2954.2 | 2960.6 |
|                                | 3015.1                      | 3018.6          | 3036.2  | 3041.8          | 3043.6 | 3045.5          | 3050.0 | 3065.1 |
|                                | 3089.1                      | 3096.9          | 3097.1  | 3098.5          | 3113.6 | 3119.4          | 3127.9 | 3129.7 |
|                                | 3203.0                      |                 |         |                 |        |                 |        |        |
| electronic state               | 2-A                         |                 |         |                 |        |                 |        |        |
| point group                    | C1                          |                 |         |                 |        |                 |        |        |
| rotational constants           | 2.76774                     | 0.66629         | 0.60695 |                 |        |                 |        |        |
| ZPE                            | 0.270001 (Hartree/Particle) |                 |         |                 |        |                 |        |        |
| TS <sub>f</sub> '              |                             |                 |         |                 |        |                 |        |        |
| optimized Cartesian coordinate | C                           | 0.865919000000  |         | 0.314486000000  |        | -0.967439000000 |        |        |
|                                | C                           | 0.540892000000  |         | -0.654474000000 |        | 0.174850000000  |        |        |
|                                | C                           | -0.684629000000 |         | -1.518302000000 |        | -0.129689000000 |        |        |
|                                | C                           | -2.011647000000 |         | -0.765735000000 |        | -0.280444000000 |        |        |
|                                | C                           | -2.379807000000 |         | -0.009562000000 |        | 0.973157000000  |        |        |
|                                | H                           | -1.638052000000 |         | 1.093456000000  |        | 0.996702000000  |        |        |
|                                | O                           | -1.076561000000 |         | 2.132214000000  |        | 0.872236000000  |        |        |
|                                | O                           | -1.521441000000 |         | 2.613281000000  |        | -0.351717000000 |        |        |
|                                | H                           | -2.213704000000 |         | 3.241793000000  |        | -0.109152000000 |        |        |
|                                | C                           | 1.761031000000  |         | -1.532743000000 |        | 0.475267000000  |        |        |
|                                | C                           | 2.998595000000  |         | -0.692800000000 |        | 0.799327000000  |        |        |
|                                | C                           | 3.309797000000  |         | 0.290805000000  |        | -0.330781000000 |        |        |
|                                | C                           | 2.094851000000  |         | 1.165853000000  |        | -0.644614000000 |        |        |
|                                | H                           | 1.535803000000  |         | -2.211442000000 |        | 1.304618000000  |        |        |
|                                | H                           | 0.339079000000  |         | -0.054309000000 |        | 1.072944000000  |        |        |
|                                | H                           | 1.055701000000  |         | -0.273811000000 |        | -1.876829000000 |        |        |
|                                | H                           | 0.016856000000  |         | 0.968058000000  |        | -1.176018000000 |        |        |
|                                | H                           | 2.816013000000  |         | -0.130526000000 |        | 1.723173000000  |        |        |
|                                | H                           | 3.857912000000  |         | -1.342457000000 |        | 0.987867000000  |        |        |
|                                | H                           | 4.170858000000  |         | 0.911243000000  |        | -0.067144000000 |        |        |
|                                | H                           | 3.587523000000  |         | -0.273614000000 |        | -1.229794000000 |        |        |
|                                | H                           | 1.861568000000  |         | 1.797732000000  |        | 0.220703000000  |        |        |
|                                | H                           | 2.315222000000  |         | 1.838473000000  |        | -1.477976000000 |        |        |
|                                | H                           | 1.967967000000  |         | -2.161550000000 |        | -0.401620000000 |        |        |
|                                | H                           | -0.806957000000 |         | -2.263014000000 |        | 0.668825000000  |        |        |
|                                | H                           | -0.494447000000 |         | -2.083498000000 |        | -1.051047000000 |        |        |
|                                | H                           | -1.931876000000 |         | -0.045779000000 |        | -1.104129000000 |        |        |
|                                | H                           | -3.380546000000 |         | 0.425270000000  |        | 0.978267000000  |        |        |
|                                | H                           | -2.127637000000 |         | -0.498470000000 |        | 1.916396000000  |        |        |
|                                | C                           | -3.141665000000 |         | -1.748093000000 |        | -0.632507000000 |        |        |
|                                | H                           | -3.279016000000 |         | -2.477921000000 |        | 0.170530000000  |        |        |
|                                | H                           | -4.089235000000 |         | -1.227133000000 |        | -0.785129000000 |        |        |
|                                | H                           | -2.899037000000 |         | -2.293066000000 |        | -1.548100000000 |        |        |
| frequencies                    | -1828.2                     | 43.3            | 62.3    | 77.3            | 93.7   | 118.1           | 135.5  | 180.8  |
|                                | 203.2                       | 244.1           | 250.2   | 279.4           | 321.7  | 334.4           | 378.2  | 406.3  |
|                                | 419.0                       | 448.2           | 462.6   | 481.6           | 576.8  | 579.4           | 595.1  | 794.9  |
|                                | 801.9                       | 841.2           | 857.3   | 871.5           | 909.8  | 925.7           | 940.0  | 954.6  |
|                                | 964.1                       | 979.3           | 1004.2  | 1056.2          | 1061.9 | 1068.2          | 1076.2 | 1097.3 |
|                                | 1108.0                      | 1130.3          | 1141.3  | 1164.2          | 1183.9 | 1194.5          | 1222.4 | 1248.0 |
|                                | 1289.1                      | 1292.2          | 1305.6  | 1309.3          | 1332.1 | 1345.8          | 1366.0 | 1370.8 |
|                                | 1378.2                      | 1386.5          | 1389.1  | 1396.8          | 1402.5 | 1405.9          | 1418.0 | 1452.8 |
|                                | 1471.9                      | 1481.1          | 1487.1  | 1489.8          | 1490.5 | 1496.3          | 1500.1 | 1503.4 |
|                                | 1510.1                      | 3016.0          | 3019.4  | 3022.1          | 3033.8 | 3035.8          | 3041.9 | 3044.6 |
|                                | 3048.1                      | 3051.9          | 3065.8  | 3080.1          | 3083.3 | 3091.5          | 3093.7 | 3098.7 |
|                                | 3124.8                      | 3127.5          | 3133.6  | 3167.0          | 3818.5 |                 |        |        |
| electronic state               | 2-A                         |                 |         |                 |        |                 |        |        |
| point group                    | C1                          |                 |         |                 |        |                 |        |        |
| rotational constants           | 1.11751                     | 0.58792         | 0.44416 |                 |        |                 |        |        |
| ZPE                            | 0.295610 (Hartree/Particle) |                 |         |                 |        |                 |        |        |

|                                |                             |                 |                 |                 |        |        |        |        |  |
|--------------------------------|-----------------------------|-----------------|-----------------|-----------------|--------|--------|--------|--------|--|
| TS <sub>rβ</sub>               |                             |                 |                 |                 |        |        |        |        |  |
| optimized Cartesian coordinate | C                           | -1.851573000000 | -1.075935000000 | -0.971849000000 |        |        |        |        |  |
|                                | C                           | -0.716138000000 | -0.657199000000 | -0.029998000000 |        |        |        |        |  |
|                                | C                           | 0.644275000000  | -0.926927000000 | -0.674867000000 |        |        |        |        |  |
|                                | C                           | 1.877755000000  | -0.739511000000 | 0.191396000000  |        |        |        |        |  |
|                                | C                           | 3.156372000000  | -1.113042000000 | -0.527306000000 |        |        |        |        |  |
|                                | H                           | 2.036590000000  | 0.536998000000  | 0.325722000000  |        |        |        |        |  |
|                                | O                           | 2.288062000000  | 1.738402000000  | 0.311412000000  |        |        |        |        |  |
|                                | O                           | 1.967656000000  | 2.124175000000  | -0.979949000000 |        |        |        |        |  |
|                                | H                           | 1.061849000000  | 2.451902000000  | -0.896763000000 |        |        |        |        |  |
|                                | C                           | -0.894182000000 | 0.812142000000  | 0.370570000000  |        |        |        |        |  |
|                                | C                           | -2.264097000000 | 1.066409000000  | 1.003447000000  |        |        |        |        |  |
|                                | C                           | -3.392442000000 | 0.635119000000  | 0.064903000000  |        |        |        |        |  |
|                                | C                           | -3.228071000000 | -0.827894000000 | -0.351484000000 |        |        |        |        |  |
|                                | H                           | -0.094797000000 | 1.131466000000  | 1.045419000000  |        |        |        |        |  |
|                                | H                           | -0.803824000000 | -1.269587000000 | 0.877956000000  |        |        |        |        |  |
|                                | H                           | -1.764099000000 | -0.503291000000 | -1.905166000000 |        |        |        |        |  |
|                                | H                           | -1.741046000000 | -2.131721000000 | -1.238639000000 |        |        |        |        |  |
|                                | H                           | -2.335331000000 | 0.499211000000  | 1.939575000000  |        |        |        |        |  |
|                                | H                           | -2.368229000000 | 2.122454000000  | 1.266193000000  |        |        |        |        |  |
|                                | H                           | -4.364321000000 | 0.788459000000  | 0.541347000000  |        |        |        |        |  |
|                                | H                           | -3.374401000000 | 1.267547000000  | -0.831304000000 |        |        |        |        |  |
|                                | H                           | -3.343065000000 | -1.467603000000 | 0.532022000000  |        |        |        |        |  |
|                                | H                           | -4.015463000000 | -1.114515000000 | -1.053642000000 |        |        |        |        |  |
|                                | H                           | -0.812545000000 | 1.420166000000  | -0.543544000000 |        |        |        |        |  |
|                                | H                           | 0.749575000000  | -0.305288000000 | -1.574512000000 |        |        |        |        |  |
|                                | H                           | 0.659971000000  | -1.969156000000 | -1.032661000000 |        |        |        |        |  |
|                                | H                           | 4.035059000000  | -0.837255000000 | 0.058846000000  |        |        |        |        |  |
|                                | H                           | 3.188975000000  | -2.196525000000 | -0.700446000000 |        |        |        |        |  |
| H                              | 3.218458000000              | -0.612670000000 | -1.496468000000 |                 |        |        |        |        |  |
| C                              | 1.787706000000              | -1.256940000000 | 1.610497000000  |                 |        |        |        |        |  |
| H                              | 0.975771000000              | -0.789263000000 | 2.170971000000  |                 |        |        |        |        |  |
| H                              | 1.606282000000              | -2.340379000000 | 1.603661000000  |                 |        |        |        |        |  |
| H                              | 2.721212000000              | -1.078896000000 | 2.147878000000  |                 |        |        |        |        |  |
| frequencies                    | -1735.0                     | 37.2            | 57.8            | 78.4            | 99.0   | 118.4  | 147.7  | 171.8  |  |
|                                | 211.3                       | 221.5           | 229.1           | 248.1           | 289.4  | 306.3  | 338.6  | 354.1  |  |
|                                | 404.7                       | 431.3           | 450.7           | 457.5           | 487.6  | 576.6  | 581.9  | 792.6  |  |
|                                | 803.4                       | 821.5           | 846.8           | 865.3           | 911.6  | 920.6  | 941.3  | 950.4  |  |
|                                | 970.8                       | 992.8           | 1006.7          | 1057.0          | 1066.7 | 1075.4 | 1083.3 | 1104.4 |  |
|                                | 1125.6                      | 1132.4          | 1153.3          | 1172.6          | 1206.2 | 1225.6 | 1256.3 | 1273.1 |  |
|                                | 1292.2                      | 1293.3          | 1301.4          | 1322.0          | 1340.5 | 1368.3 | 1380.3 | 1384.7 |  |
|                                | 1387.9                      | 1392.1          | 1397.6          | 1408.6          | 1412.3 | 1416.7 | 1460.5 | 1461.5 |  |
|                                | 1477.3                      | 1486.0          | 1487.7          | 1489.1          | 1491.5 | 1494.3 | 1499.4 | 1509.7 |  |
|                                | 1512.8                      | 2990.5          | 3000.3          | 3022.0          | 3024.1 | 3030.3 | 3031.9 | 3037.8 |  |
|                                | 3042.2                      | 3046.7          | 3050.8          | 3085.4          | 3096.7 | 3097.4 | 3099.9 | 3101.8 |  |
|                                | 3107.3                      | 3109.2          | 3140.7          | 3143.1          | 3805.0 |        |        |        |  |
| electronic state               | 2-A                         |                 |                 |                 |        |        |        |        |  |
| point group                    | C1                          |                 |                 |                 |        |        |        |        |  |
| rotational constants           | 1.30820                     | 0.51445         | 0.44640         |                 |        |        |        |        |  |
| ZPE                            | 0.295218 (Hartree/Particle) |                 |                 |                 |        |        |        |        |  |
| TS <sub>rα</sub>               |                             |                 |                 |                 |        |        |        |        |  |
| optimized Cartesian coordinate | C                           | 1.499095000000  | 0.116563000000  | 1.375572000000  |        |        |        |        |  |
|                                | C                           | 0.547919000000  | -0.572049000000 | 0.386781000000  |        |        |        |        |  |
|                                | C                           | -0.894175000000 | -0.274546000000 | 0.737990000000  |        |        |        |        |  |
|                                | C                           | -2.006811000000 | -0.750345000000 | -0.171921000000 |        |        |        |        |  |
|                                | C                           | -3.367566000000 | -0.332020000000 | 0.387434000000  |        |        |        |        |  |
|                                | H                           | -0.976258000000 | 1.033560000000  | 0.654199000000  |        |        |        |        |  |
|                                | H                           | -3.402171000000 | 0.742763000000  | 0.586916000000  |        |        |        |        |  |
|                                | O                           | -1.077540000000 | 2.220731000000  | 0.420677000000  |        |        |        |        |  |
|                                | O                           | -1.489266000000 | 2.285085000000  | -0.903177000000 |        |        |        |        |  |
|                                | H                           | -2.446489000000 | 2.401481000000  | -0.837640000000 |        |        |        |        |  |
|                                | C                           | 0.901368000000  | -0.182738000000 | -1.055079000000 |        |        |        |        |  |
|                                | C                           | 2.369384000000  | -0.477088000000 | -1.371663000000 |        |        |        |        |  |
|                                | C                           | 3.303554000000  | 0.218148000000  | -0.380141000000 |        |        |        |        |  |
|                                | C                           | 2.964521000000  | -0.182746000000 | 1.056614000000  |        |        |        |        |  |

|                                |                             |                 |                 |                 |        |        |        |        |
|--------------------------------|-----------------------------|-----------------|-----------------|-----------------|--------|--------|--------|--------|
|                                | H                           | 0.257021000000  | -0.713697000000 | -1.762046000000 |        |        |        |        |
|                                | H                           | 0.696264000000  | -1.661072000000 | 0.490756000000  |        |        |        |        |
|                                | H                           | 1.328263000000  | 1.198875000000  | 1.321821000000  |        |        |        |        |
|                                | H                           | 1.258028000000  | -0.196575000000 | 2.396535000000  |        |        |        |        |
|                                | H                           | 2.538588000000  | -1.560322000000 | -1.324221000000 |        |        |        |        |
|                                | H                           | 2.599004000000  | -0.165722000000 | -2.394068000000 |        |        |        |        |
|                                | H                           | 4.345941000000  | -0.021307000000 | -0.607000000000 |        |        |        |        |
|                                | H                           | 3.193569000000  | 1.304106000000  | -0.484838000000 |        |        |        |        |
|                                | H                           | 3.151820000000  | -1.256146000000 | 1.184839000000  |        |        |        |        |
|                                | H                           | 3.615926000000  | 0.339155000000  | 1.762570000000  |        |        |        |        |
|                                | H                           | 0.699888000000  | 0.887550000000  | -1.185870000000 |        |        |        |        |
|                                | H                           | -1.116870000000 | -0.434600000000 | 1.799592000000  |        |        |        |        |
|                                | H                           | -1.873985000000 | -0.278368000000 | -1.152180000000 |        |        |        |        |
|                                | H                           | -4.173805000000 | -0.583613000000 | -0.305266000000 |        |        |        |        |
|                                | H                           | -3.564949000000 | -0.845105000000 | 1.333645000000  |        |        |        |        |
|                                | C                           | -1.947430000000 | -2.273425000000 | -0.363799000000 |        |        |        |        |
|                                | H                           | -1.017070000000 | -2.582252000000 | -0.844660000000 |        |        |        |        |
|                                | H                           | -2.017373000000 | -2.782855000000 | 0.602123000000  |        |        |        |        |
|                                | H                           | -2.780054000000 | -2.610905000000 | -0.985930000000 |        |        |        |        |
| frequencies                    | -1761.8                     | 60.3            | 69.3            | 90.9            | 97.9   | 111.2  | 140.3  | 158.6  |
|                                | 224.7                       | 234.0           | 239.6           | 274.8           | 291.5  | 335.9  | 366.6  | 402.2  |
|                                | 408.4                       | 424.0           | 447.1           | 453.3           | 492.1  | 587.9  | 604.1  | 793.3  |
|                                | 800.5                       | 848.5           | 861.6           | 872.3           | 909.6  | 926.5  | 939.4  | 946.7  |
|                                | 965.3                       | 985.2           | 1012.2          | 1058.8          | 1067.1 | 1072.2 | 1083.7 | 1101.4 |
|                                | 1113.4                      | 1128.8          | 1152.4          | 1172.5          | 1194.3 | 1201.1 | 1223.1 | 1261.3 |
|                                | 1286.6                      | 1304.2          | 1309.1          | 1319.7          | 1334.0 | 1348.9 | 1367.2 | 1379.5 |
|                                | 1387.3                      | 1389.9          | 1395.1          | 1404.4          | 1407.3 | 1412.4 | 1418.8 | 1459.8 |
|                                | 1483.4                      | 1488.3          | 1489.9          | 1491.6          | 1494.7 | 1496.9 | 1507.3 | 1509.5 |
|                                | 1515.8                      | 2967.6          | 3035.2          | 3037.1          | 3042.6 | 3047.1 | 3048.9 | 3049.2 |
|                                | 3051.0                      | 3055.6          | 3070.8          | 3088.9          | 3096.0 | 3097.1 | 3098.3 | 3102.4 |
|                                | 3116.2                      | 3123.3          | 3131.3          | 3136.2          | 3810.2 |        |        |        |
| electronic state               | 2-A                         |                 |                 |                 |        |        |        |        |
| point group                    | C1                          |                 |                 |                 |        |        |        |        |
| rotational constants           | 1.20472                     | 0.55437         | 0.47786         |                 |        |        |        |        |
| ZPE                            | 0.295735 (Hartree/Particle) |                 |                 |                 |        |        |        |        |
| TS <sub>f</sub> α'             |                             |                 |                 |                 |        |        |        |        |
| optimized Cartesian coordinate | C                           | -1.305232000000 | -0.095030000000 | 1.407492000000  |        |        |        |        |
|                                | C                           | -0.274063000000 | -0.293523000000 | 0.308971000000  |        |        |        |        |
|                                | C                           | 1.125783000000  | -0.508031000000 | 0.855114000000  |        |        |        |        |
|                                | C                           | 2.242610000000  | -0.816310000000 | -0.147975000000 |        |        |        |        |
|                                | C                           | 2.499799000000  | 0.354700000000  | -1.097547000000 |        |        |        |        |
|                                | H                           | -0.274340000000 | 0.874960000000  | -0.252371000000 |        |        |        |        |
|                                | O                           | -0.308817000000 | 2.037874000000  | -0.652949000000 |        |        |        |        |
|                                | O                           | 0.499419000000  | 2.717449000000  | 0.244914000000  |        |        |        |        |
|                                | H                           | 1.362913000000  | 2.719862000000  | -0.190184000000 |        |        |        |        |
|                                | H                           | 2.896326000000  | 1.205392000000  | -0.529839000000 |        |        |        |        |
|                                | C                           | -0.731066000000 | -1.223554000000 | -0.800070000000 |        |        |        |        |
|                                | C                           | -2.129318000000 | -0.868201000000 | -1.314951000000 |        |        |        |        |
|                                | C                           | -3.142037000000 | -0.788148000000 | -0.172365000000 |        |        |        |        |
|                                | C                           | -2.696806000000 | 0.240431000000  | 0.867397000000  |        |        |        |        |
|                                | H                           | -0.015408000000 | -1.216096000000 | -1.626538000000 |        |        |        |        |
|                                | H                           | -1.357133000000 | -1.028237000000 | 1.990625000000  |        |        |        |        |
|                                | H                           | -0.957631000000 | 0.685289000000  | 2.091944000000  |        |        |        |        |
|                                | H                           | -2.084134000000 | 0.103296000000  | -1.820919000000 |        |        |        |        |
|                                | H                           | -2.444974000000 | -1.602668000000 | -2.060234000000 |        |        |        |        |
|                                | H                           | -4.130363000000 | -0.530874000000 | -0.561811000000 |        |        |        |        |
|                                | H                           | -3.231781000000 | -1.773366000000 | 0.302606000000  |        |        |        |        |
|                                | H                           | -2.667752000000 | 1.232780000000  | 0.405854000000  |        |        |        |        |
|                                | H                           | -3.411541000000 | 0.287361000000  | 1.692855000000  |        |        |        |        |
|                                | H                           | -0.736763000000 | -2.250786000000 | -0.399720000000 |        |        |        |        |
|                                | H                           | 1.065491000000  | -1.340340000000 | 1.574048000000  |        |        |        |        |
|                                | H                           | 1.408203000000  | 0.373048000000  | 1.448365000000  |        |        |        |        |
|                                | H                           | 1.944813000000  | -1.686805000000 | -0.742735000000 |        |        |        |        |
|                                | H                           | 3.250195000000  | 0.092714000000  | -1.847135000000 |        |        |        |        |
|                                | H                           | 1.593990000000  | 0.673576000000  | -1.618803000000 |        |        |        |        |
|                                | C                           | 3.526624000000  | -1.179271000000 | 0.599328000000  |        |        |        |        |

|                                |                             |                 |                 |                 |        |        |        |        |
|--------------------------------|-----------------------------|-----------------|-----------------|-----------------|--------|--------|--------|--------|
|                                | H                           | 4.337075000000  | -1.404991000000 | -0.097666000000 |        |        |        |        |
|                                | H                           | 3.849923000000  | -0.345438000000 | 1.230373000000  |        |        |        |        |
|                                | H                           | 3.380299000000  | -2.049629000000 | 1.243205000000  |        |        |        |        |
| frequencies                    | -1716.8                     | 53.0            | 54.9            | 73.9            | 101.4  | 126.4  | 154.4  | 155.4  |
|                                | 205.4                       | 239.0           | 245.2           | 282.5           | 307.2  | 311.5  | 330.0  | 380.1  |
|                                | 411.9                       | 423.1           | 436.4           | 454.1           | 485.4  | 532.0  | 621.2  | 784.8  |
|                                | 792.3                       | 830.1           | 851.6           | 864.3           | 916.6  | 920.7  | 938.4  | 940.4  |
|                                | 963.5                       | 981.0           | 1001.3          | 1056.8          | 1069.7 | 1080.0 | 1095.2 | 1101.4 |
|                                | 1120.6                      | 1149.4          | 1165.8          | 1177.0          | 1192.1 | 1207.3 | 1246.6 | 1253.8 |
|                                | 1291.4                      | 1300.0          | 1316.3          | 1328.7          | 1354.5 | 1367.9 | 1369.8 | 1385.7 |
|                                | 1388.9                      | 1398.6          | 1401.1          | 1405.7          | 1412.2 | 1421.6 | 1457.6 | 1460.0 |
|                                | 1468.5                      | 1477.0          | 1493.0          | 1493.5          | 1495.7 | 1499.7 | 1509.1 | 1512.5 |
|                                | 1522.6                      | 2987.8          | 2991.8          | 2998.9          | 3033.2 | 3036.2 | 3038.4 | 3049.8 |
|                                | 3050.8                      | 3061.0          | 3062.8          | 3085.5          | 3096.9 | 3100.1 | 3101.9 | 3108.1 |
|                                | 3110.3                      | 3121.4          | 3131.5          | 3134.8          | 3805.5 |        |        |        |
| electronic state               | 2-A                         |                 |                 |                 |        |        |        |        |
| point group                    | C1                          |                 |                 |                 |        |        |        |        |
| rotational constants           | 1.19664                     | 0.58438         | 0.49720         |                 |        |        |        |        |
| ZPE                            | 0.295532 (Hartree/Particle) |                 |                 |                 |        |        |        |        |
| TS <sub>β'</sub>               |                             |                 |                 |                 |        |        |        |        |
| optimized Cartesian coordinate | C                           | 0.935064000000  | 0.152455000000  | 1.081992000000  |        |        |        |        |
|                                | C                           | 2.157848000000  | -0.733618000000 | 1.123033000000  |        |        |        |        |
|                                | C                           | 2.450828000000  | -1.353090000000 | -0.245838000000 |        |        |        |        |
|                                | H                           | 1.278798000000  | 1.120555000000  | 0.273374000000  |        |        |        |        |
|                                | O                           | 1.700618000000  | 1.943304000000  | -0.518673000000 |        |        |        |        |
|                                | O                           | 3.073180000000  | 1.939462000000  | -0.308900000000 |        |        |        |        |
|                                | H                           | 3.213330000000  | 2.694490000000  | 0.276780000000  |        |        |        |        |
|                                | C                           | 0.034624000000  | -1.068515000000 | -0.916525000000 |        |        |        |        |
|                                | C                           | -0.307325000000 | -0.429778000000 | 0.436089000000  |        |        |        |        |
|                                | H                           | 3.280135000000  | -2.060062000000 | -0.163609000000 |        |        |        |        |
|                                | H                           | 0.289797000000  | -0.269465000000 | -1.624037000000 |        |        |        |        |
|                                | H                           | -0.843081000000 | -1.584457000000 | -1.315378000000 |        |        |        |        |
|                                | H                           | 1.977705000000  | -1.534802000000 | 1.856544000000  |        |        |        |        |
|                                | H                           | 3.022505000000  | -0.168572000000 | 1.481222000000  |        |        |        |        |
|                                | H                           | 0.733506000000  | 0.693604000000  | 2.010483000000  |        |        |        |        |
|                                | H                           | -0.658101000000 | -1.231041000000 | 1.108059000000  |        |        |        |        |
|                                | H                           | 2.767743000000  | -0.559576000000 | -0.930460000000 |        |        |        |        |
|                                | C                           | 1.208159000000  | -2.044444000000 | -0.806944000000 |        |        |        |        |
|                                | H                           | 1.426355000000  | -2.475269000000 | -1.787528000000 |        |        |        |        |
|                                | H                           | 0.925883000000  | -2.877164000000 | -0.150013000000 |        |        |        |        |
|                                | C                           | -1.403289000000 | 0.637058000000  | 0.329999000000  |        |        |        |        |
|                                | H                           | -1.007217000000 | 1.482457000000  | -0.246896000000 |        |        |        |        |
|                                | H                           | -1.616556000000 | 1.021032000000  | 1.336977000000  |        |        |        |        |
|                                | C                           | -2.724323000000 | 0.184135000000  | -0.302820000000 |        |        |        |        |
|                                | H                           | -2.533485000000 | -0.082739000000 | -1.348434000000 |        |        |        |        |
|                                | C                           | -3.724674000000 | 1.340662000000  | -0.290334000000 |        |        |        |        |
|                                | H                           | -3.317435000000 | 2.221945000000  | -0.791967000000 |        |        |        |        |
|                                | H                           | -4.655430000000 | 1.063867000000  | -0.791234000000 |        |        |        |        |
|                                | H                           | -3.968818000000 | 1.622550000000  | 0.738944000000  |        |        |        |        |
|                                | C                           | -3.311022000000 | -1.035613000000 | 0.408389000000  |        |        |        |        |
|                                | H                           | -2.669850000000 | -1.915113000000 | 0.313518000000  |        |        |        |        |
|                                | H                           | -3.441595000000 | -0.827683000000 | 1.475899000000  |        |        |        |        |
|                                | H                           | -4.289913000000 | -1.292193000000 | -0.003901000000 |        |        |        |        |
| frequencies                    | -1745.6                     | 50.3            | 54.6            | 75.1            | 97.1   | 100.8  | 134.3  | 163.9  |
|                                | 201.6                       | 237.7           | 253.7           | 265.3           | 300.7  | 317.3  | 343.6  | 403.2  |
|                                | 407.8                       | 427.3           | 455.5           | 481.7           | 492.8  | 577.8  | 603.6  | 790.2  |
|                                | 796.8                       | 829.4           | 849.9           | 871.1           | 906.6  | 922.8  | 933.9  | 942.8  |
|                                | 965.1                       | 980.2           | 999.1           | 1056.0          | 1062.6 | 1070.8 | 1081.5 | 1103.5 |
|                                | 1127.2                      | 1141.1          | 1166.7          | 1172.2          | 1197.4 | 1202.4 | 1230.2 | 1246.0 |
|                                | 1284.4                      | 1292.6          | 1315.0          | 1331.4          | 1337.7 | 1357.1 | 1365.9 | 1373.8 |
|                                | 1384.0                      | 1390.0          | 1398.3          | 1401.6          | 1406.5 | 1409.7 | 1422.7 | 1461.0 |
|                                | 1463.9                      | 1480.8          | 1489.1          | 1493.3          | 1493.5 | 1498.6 | 1506.4 | 1509.5 |
|                                | 1516.5                      | 2977.2          | 2998.8          | 3021.0          | 3033.4 | 3044.7 | 3045.6 | 3046.6 |
|                                | 3053.0                      | 3064.3          | 3069.8          | 3091.5          | 3097.2 | 3099.5 | 3100.9 | 3111.3 |
|                                | 3114.4                      | 3120.1          | 3128.3          | 3130.0          | 3820.2 |        |        |        |

|                                |                             |                 |        |         |                 |        |         |                 |  |  |
|--------------------------------|-----------------------------|-----------------|--------|---------|-----------------|--------|---------|-----------------|--|--|
| electronic state               | 2-A                         |                 |        |         |                 |        |         |                 |  |  |
| point group                    | C1                          |                 |        |         |                 |        |         |                 |  |  |
| rotational constants           | 1.27538                     |                 |        | 0.50605 |                 |        | 0.41510 |                 |  |  |
| ZPE                            | 0.295347 (Hartree/Particle) |                 |        |         |                 |        |         |                 |  |  |
| TS <sub>i</sub> ρ'             |                             |                 |        |         |                 |        |         |                 |  |  |
| optimized Cartesian coordinate | C                           | -1.908144000000 |        |         | 0.073690000000  |        |         | 1.123770000000  |  |  |
|                                | C                           | -0.416593000000 |        |         | -0.172235000000 |        |         | 1.112668000000  |  |  |
|                                | C                           | 0.096903000000  |        |         | -0.640132000000 |        |         | -0.255546000000 |  |  |
|                                | H                           | -2.059610000000 |        |         | 1.076384000000  |        |         | 0.302280000000  |  |  |
|                                | O                           | -2.069363000000 |        |         | 1.996875000000  |        |         | -0.494581000000 |  |  |
|                                | O                           | -0.855364000000 |        |         | 2.635891000000  |        |         | -0.285124000000 |  |  |
|                                | H                           | -1.082461000000 |        |         | 3.368912000000  |        |         | 0.301721000000  |  |  |
|                                | C                           | -2.237988000000 |        |         | -1.449581000000 |        |         | -0.845157000000 |  |  |
|                                | C                           | -2.762092000000 |        |         | -1.022734000000 |        |         | 0.528355000000  |  |  |
|                                | H                           | -2.375515000000 |        |         | -0.624702000000 |        |         | -1.552300000000 |  |  |
|                                | H                           | -2.817863000000 |        |         | -2.297320000000 |        |         | -1.218556000000 |  |  |
|                                | H                           | -0.184485000000 |        |         | -0.947032000000 |        |         | 1.863009000000  |  |  |
|                                | H                           | 0.108906000000  |        |         | 0.733833000000  |        |         | 1.428120000000  |  |  |
|                                | H                           | -2.288112000000 |        |         | 0.487692000000  |        |         | 2.060076000000  |  |  |
|                                | H                           | -2.734946000000 |        |         | -1.887142000000 |        |         | 1.209591000000  |  |  |
|                                | H                           | -3.806251000000 |        |         | -0.704633000000 |        |         | 0.469163000000  |  |  |
|                                | H                           | -0.024250000000 |        |         | 0.194960000000  |        |         | -0.957213000000 |  |  |
|                                | C                           | -0.753596000000 |        |         | -1.807351000000 |        |         | -0.770172000000 |  |  |
|                                | H                           | -0.620071000000 |        |         | -2.667281000000 |        |         | -0.099128000000 |  |  |
|                                | H                           | -0.388878000000 |        |         | -2.116344000000 |        |         | -1.754554000000 |  |  |
|                                | C                           | 1.573508000000  |        |         | -1.042720000000 |        |         | -0.205109000000 |  |  |
|                                | H                           | 1.666492000000  |        |         | -1.945592000000 |        |         | 0.413724000000  |  |  |
|                                | H                           | 1.889033000000  |        |         | -1.330417000000 |        |         | -1.217048000000 |  |  |
|                                | C                           | 2.551432000000  |        |         | 0.015524000000  |        |         | 0.319407000000  |  |  |
|                                | H                           | 2.305053000000  |        |         | 0.228061000000  |        |         | 1.366676000000  |  |  |
|                                | C                           | 2.455514000000  |        |         | 1.318742000000  |        |         | -0.474328000000 |  |  |
|                                | H                           | 1.468144000000  |        |         | 1.777972000000  |        |         | -0.394242000000 |  |  |
|                                | H                           | 3.197746000000  |        |         | 2.040951000000  |        |         | -0.124269000000 |  |  |
|                                | H                           | 2.650803000000  |        |         | 1.128570000000  |        |         | -1.535404000000 |  |  |
|                                | C                           | 3.978319000000  |        |         | -0.533122000000 |        |         | 0.280211000000  |  |  |
|                                | H                           | 4.277644000000  |        |         | -0.740159000000 |        |         | -0.752096000000 |  |  |
|                                | H                           | 4.689415000000  |        |         | 0.184480000000  |        |         | 0.696483000000  |  |  |
|                                | H                           | 4.063444000000  |        |         | -1.463801000000 |        |         | 0.847013000000  |  |  |
| frequencies                    | -1741.1                     | 53.1            | 68.9   | 88.9    | 94.8            | 105.1  | 140.6   | 176.7           |  |  |
|                                | 203.3                       | 233.0           | 259.9  | 276.4   | 304.2           | 316.2  | 324.4   | 401.8           |  |  |
|                                | 409.2                       | 426.2           | 450.0  | 470.9   | 498.6           | 571.9  | 615.1   | 788.8           |  |  |
|                                | 799.1                       | 827.3           | 850.3  | 866.1   | 903.8           | 920.7  | 935.7   | 945.0           |  |  |
|                                | 963.9                       | 981.6           | 1000.0 | 1054.0  | 1065.1          | 1075.4 | 1082.9  | 1111.6          |  |  |
|                                | 1128.4                      | 1136.6          | 1160.3 | 1172.4  | 1202.6          | 1205.0 | 1232.4  | 1250.0          |  |  |
|                                | 1285.0                      | 1301.4          | 1308.1 | 1333.1  | 1339.5          | 1361.7 | 1369.6  | 1376.1          |  |  |
|                                | 1385.9                      | 1389.6          | 1401.2 | 1406.0  | 1408.5          | 1414.2 | 1424.2  | 1459.5          |  |  |
|                                | 1462.5                      | 1472.4          | 1478.9 | 1491.6  | 1495.8          | 1498.5 | 1500.7  | 1510.0          |  |  |
|                                | 1521.5                      | 2979.1          | 3001.3 | 3017.3  | 3022.3          | 3037.4 | 3045.6  | 3048.1          |  |  |
|                                | 3050.1                      | 3059.1          | 3065.5 | 3088.7  | 3092.0          | 3094.3 | 3107.4  | 3110.6          |  |  |
|                                | 3112.0                      | 3118.9          | 3127.1 | 3142.0  | 3818.2          |        |         |                 |  |  |
| electronic state               | 2-A                         |                 |        |         |                 |        |         |                 |  |  |
| point group                    | C1                          |                 |        |         |                 |        |         |                 |  |  |
| rotational constants           | 1.16184                     |                 |        | 0.57553 |                 |        | 0.44435 |                 |  |  |
| ZPE                            | 0.295433 (Hartree/Particle) |                 |        |         |                 |        |         |                 |  |  |
| TS <sub>i</sub> ρ'             |                             |                 |        |         |                 |        |         |                 |  |  |
| optimized Cartesian coordinate | C                           | -2.377723000000 |        |         | -0.947422000000 |        |         | 0.455992000000  |  |  |
|                                | C                           | -1.448991000000 |        |         | -0.325462000000 |        |         | 1.471652000000  |  |  |
|                                | C                           | -0.213581000000 |        |         | 0.298845000000  |        |         | 0.815763000000  |  |  |
|                                | C                           | 0.499888000000  |        |         | -0.682783000000 |        |         | -0.119953000000 |  |  |
|                                | C                           | 1.716688000000  |        |         | -0.053409000000 |        |         | -0.804617000000 |  |  |
|                                | C                           | 2.781542000000  |        |         | 0.552158000000  |        |         | 0.118155000000  |  |  |
|                                | C                           | 3.277168000000  |        |         | -0.454621000000 |        |         | 1.156861000000  |  |  |



|                      |                             |                 |                 |                 |        |        |        |        |
|----------------------|-----------------------------|-----------------|-----------------|-----------------|--------|--------|--------|--------|
|                      | H                           | -2.778056000000 | 0.074930000000  | -0.256234000000 |        |        |        |        |
|                      | O                           | -3.045350000000 | 1.102440000000  | -0.846024000000 |        |        |        |        |
|                      | O                           | -2.948763000000 | 2.087648000000  | 0.126964000000  |        |        |        |        |
|                      | H                           | -3.863320000000 | 2.215548000000  | 0.409845000000  |        |        |        |        |
|                      | H                           | 3.656652000000  | -1.355407000000 | 0.662432000000  |        |        |        |        |
|                      | C                           | -0.482630000000 | -1.203908000000 | -1.175505000000 |        |        |        |        |
|                      | C                           | -1.710568000000 | -1.864574000000 | -0.544097000000 |        |        |        |        |
|                      | H                           | 0.466996000000  | 0.647469000000  | 1.597196000000  |        |        |        |        |
|                      | H                           | 0.835652000000  | -1.543799000000 | 0.475832000000  |        |        |        |        |
|                      | H                           | -0.810529000000 | -0.360676000000 | -1.795188000000 |        |        |        |        |
|                      | H                           | 0.023506000000  | -1.913084000000 | -1.837464000000 |        |        |        |        |
|                      | H                           | -1.129842000000 | -1.114971000000 | 2.170106000000  |        |        |        |        |
|                      | H                           | -1.979421000000 | 0.422714000000  | 2.066406000000  |        |        |        |        |
|                      | H                           | -3.315877000000 | -1.325497000000 | 0.867199000000  |        |        |        |        |
|                      | H                           | -1.399706000000 | -2.778891000000 | -0.015622000000 |        |        |        |        |
|                      | H                           | -2.422294000000 | -2.176627000000 | -1.312934000000 |        |        |        |        |
|                      | H                           | -0.520563000000 | 1.180590000000  | 0.3240131000000 |        |        |        |        |
|                      | H                           | 1.361669000000  | 0.727180000000  | -1.489858000000 |        |        |        |        |
|                      | H                           | 2.198413000000  | -0.817206000000 | -1.430323000000 |        |        |        |        |
|                      | H                           | 2.339493000000  | 1.404774000000  | 0.646109000000  |        |        |        |        |
|                      | H                           | 4.090655000000  | -0.031828000000 | 1.751612000000  |        |        |        |        |
|                      | H                           | 2.484535000000  | -0.758718000000 | 1.844497000000  |        |        |        |        |
|                      | C                           | 3.951447000000  | 1.075979000000  | -0.715713000000 |        |        |        |        |
|                      | H                           | 4.445162000000  | 0.251549000000  | -1.240166000000 |        |        |        |        |
|                      | H                           | 3.612672000000  | 1.795075000000  | -1.465716000000 |        |        |        |        |
|                      | H                           | 4.697671000000  | 1.567350000000  | -0.086611000000 |        |        |        |        |
| frequencies          | -1753.3                     | 44.3            | 58.7            | 67.3            | 97.6   | 119.5  | 134.6  | 178.0  |
|                      | 224.2                       | 236.5           | 259.2           | 275.4           | 296.3  | 310.5  | 318.3  | 401.4  |
|                      | 419.7                       | 429.8           | 450.7           | 463.9           | 507.9  | 565.9  | 618.3  | 784.5  |
|                      | 797.1                       | 830.9           | 853.7           | 859.5           | 919.5  | 923.1  | 934.2  | 943.0  |
|                      | 961.6                       | 978.1           | 997.5           | 1054.3          | 1061.1 | 1072.8 | 1093.5 | 1102.0 |
|                      | 1129.8                      | 1140.3          | 1162.8          | 1172.1          | 1200.1 | 1202.8 | 1227.5 | 1247.8 |
|                      | 1291.3                      | 1298.8          | 1312.1          | 1328.8          | 1348.0 | 1358.5 | 1367.6 | 1374.9 |
|                      | 1384.5                      | 1387.7          | 1403.2          | 1405.0          | 1407.4 | 1414.3 | 1421.8 | 1459.2 |
|                      | 1464.4                      | 1476.7          | 1479.1          | 1487.4          | 1494.1 | 1498.5 | 1503.1 | 1509.5 |
|                      | 1516.8                      | 2995.5          | 3002.1          | 3015.0          | 3019.8 | 3044.2 | 3046.0 | 3047.2 |
|                      | 3051.4                      | 3055.7          | 3068.1          | 3092.8          | 3095.5 | 3095.9 | 3105.8 | 3111.9 |
|                      | 3113.7                      | 3119.8          | 3127.7          | 3129.4          | 3820.3 |        |        |        |
| electronic state     | 2-A                         |                 |                 |                 |        |        |        |        |
| point group          | C1                          |                 |                 |                 |        |        |        |        |
| rotational constants | 1.39548                     | 0.43790         | 0.40569         |                 |        |        |        |        |
| ZPE                  | 0.295428 (Hartree/Particle) |                 |                 |                 |        |        |        |        |

## References

- 1 T. Bissoonauth, Z. Wang, S. Y. Mohamed, J. Wang, B. Chen, A. Rodriguez, O. Frottier, X. Zhang, Y. Zhang, C. Cao, J. Yang, O. Herbinet, F. Battin-Leclerc and S. M. Sarathy, *Proc. Combust. Inst.*, 2019, **37**, 409-417.
- 2 B. Husson, O. Herbinet, P. A. Glaude, S. S. Ahmed and F. Battin-Leclerc, *J. Phys. Chem. A*, 2012, **116**, 5100-5111.
- 3 J. Zou, X. Zhang, Y. Li, L. Ye, L. Xing, W. Li, C. Cao, Y. Zhai, F. Qi and J. Yang, *Combust. Flame*, 2020, **214**, 211-223.
- 4 A. Ristori, P. Dagaut, A. E. Bakali and M. Cathonnet, *Combust. Sci. Technol.*, 2001, **165**, 197-228.
- 5 M. Liu, R. Fang, C.-J. Sung, K. Aljohani, A. Farooq, Y. Almarzooq, O. Mathieu, E. L. Petersen, P. Dagaut, J. Zhao, Z. Tao, L. Yang and C.-W. Zhou, *Combust. Flame*, 2022, **238**, 111944.
